# Supplementary material for: Assessment of human plasma and urine sample preparation for reproducible and high-throughput UHPLC-MS clinical metabolic phenotyping
Source: Royal Society of Chemistry journal article supplement (doi:10.1039/d0an01319f), 2020-01-01
Supplement: d0an01319f2.xlsx [file d0an01319f2.xlsx]

## Sheet: PLASMA_C18_RP_LIPIDS_POS
TABLE S1A: PLASMA UHPLC-MS C18 LIPID POSITIVE ION ASSAY: COMPOUNDS IDENTIFIED USING MS/MS DATABASE MATCHES
INITIAL FILTERING - peaks retained:
- where present in <70% QC samples; - where QC RSD<30%, - where blank filter >5%
- XCMS minfrac =0.2
- peaks with a putative ID
- the highest peak intensity ionform for each putative ID
MS/MS Identification
- QC MS/MS files were submitted to Thermo Fisher Lipid Search to annotate lipid compounds based on MS/MS spectral matches to databases.																	100% ACN; no incubation							100% ACN; 60 min, -20oC incubation							100% ACN; 60 min, 4oC incubation							CHCl3; 1 min partition time							CHCl3; 20 min partition time
					LIPID SEARCH ID (MS/MS)												Sample prep replicates	UHPLC-MS injection replicates	Sample prep replicates	UHPLC-MS injection replicates	Sample prep replicates	Sample prep replicates		Sample prep replicates	UHPLC-MS injection replicates	Sample prep replicates	UHPLC-MS injection replicates	Sample prep replicates	Sample prep replicates		Sample prep replicates	UHPLC-MS injection replicates	Sample prep replicates	UHPLC-MS injection replicates	Sample prep replicates	Sample prep replicates		Sample prep replicates	UHPLC-MS injection replicates	Sample prep replicates	UHPLC-MS injection replicates	Sample prep replicates	Sample prep replicates		Sample prep replicates	UHPLC-MS injection replicates	Sample prep replicates	UHPLC-MS injection replicates	Sample prep replicates
IDX	name	MZ	RT	MPA	LipidIon	LipidGroup	Class	IonFormula	theor_mass	Grade	XCMS_mz	XCMS_mz_ppm	XCMS_rt	lipidsearch_mz	lipidsearch_mz_ppm	lipidsearch_rt	# reps a peak is present in	# reps a peak is present in	RSD (%)	RSD (%)	Mean	Standard deviation		# reps a peak is present in	# reps a peak is present in	RSD (%)	RSD (%)	Mean	Standard deviation		# reps a peak is present in	# reps a peak is present in	RSD (%)	RSD (%)	Mean	Standard deviation		# reps a peak is present in	# reps a peak is present in	RSD (%)	RSD (%)	Mean	Standard deviation		# reps a peak is present in	# reps a peak is present in	RSD (%)	RSD (%)	Mean
2266	M316T46	316.248	45.9596	2.94513e+07	AcCa(10:0)+H	AcCa(10:0)+H	AcCa	C17 H34 O4 N1	316.248	A	316.248	-1.15	45.9596	316.248	-0.11	45.6	3	3	5.65286	2.48586	3.05777e+07	1.72851e+06		3	3	2.95769	2.54705	3.14515e+07	930237		3	3	2.61718	3.5828	3.10956e+07	813828		3	3	14.9761	1.10864	1.01938e+07	1.52664e+06		3	3	6.18462	3.00528	1.0893e+07
2232	M314T42	314.232	42.2104	3.11477e+07	AcCa(10:1)+H	AcCa(10:1)+H	AcCa	C17 H32 O4 N1	314.233	A	314.232	-1.38	42.2104	314.233	-0.15	41.85	3	3	2.68606	0.127942	3.07765e+07	826674		3	3	3.57646	0.62665	3.32042e+07	1.18753e+06		3	3	2.68483	1.55562	3.09956e+07	832179		3	3	15.4014	1.84311	7.72891e+06	1.19036e+06		3	3	5.22855	2.62128	8.14946e+06
2670	M344T60	344.279	59.545	1.08078e+07	AcCa(12:0)+H	AcCa(12:0)+H	AcCa	C19 H38 O4 N1	344.28	A	344.279	-0.81	59.545	344.279	-0.12	59.31	3	3	3.66388	8.28111	1.14313e+07	418829		3	3	2.96385	8.90921	1.21086e+07	358882		3	3	2.24722	1.15529	1.15496e+07	259546		3	3	22.1339	9.04917	5.19535e+06	1.14993e+06		3	3	9.73652	5.68064	5.81991e+06
2640	M342T51	342.264	51.1201	1.22559e+07	AcCa(12:1)+H	AcCa(12:1)+H	AcCa	C19 H36 O4 N1	342.264	A	342.264	-0.99	51.1201	342.264	-0.12	50.13	3	3	2.81121	1.90795	1.23507e+07	347204		3	3	4.06575	0.343218	1.31733e+07	535595		3	3	2.88954	1.31977	1.26842e+07	366516		3	3	22.4018	3.11595	5.56795e+06	1.24732e+06		3	3	9.50483	1.52489	6.20981e+06
3056	M370T68	370.295	67.9938	9.0752e+06	AcCa(14:1)+H	AcCa(14:1)+H	AcCa	C21 H40 O4 N1	370.295	A	370.295	-1.17	67.9938	370.295	0.05	67.8	3	3	3.64183	1.00669	9.59481e+06	349426		3	3	2.53904	5.53814	1.00464e+07	255081		3	3	3.69406	5.68401	9.68823e+06	357889		3	3	24.0656	5.33342	5.53119e+06	1.33112e+06		3	3	16.0761	3.38507	6.31268e+06
3016	M368T56	368.279	56.0916	7.4524e+06	AcCa(14:2)+H	AcCa(14:2)+H	AcCa	C21 H38 O4 N1	368.28	B	368.279	-0.78	56.0916	368.279	-0.15	55.53	3	3	2.28156	3.03232	7.73099e+06	176387		3	3	3.87759	1.38863	8.02075e+06	311012		3	3	2.14995	0.968988	7.84043e+06	168565		3	3	23.5162	3.24231	4.21301e+06	990742		3	3	12.0032	0.990227	4.80479e+06
3537	M400T135	400.341	135.425	9.17494e+06	AcCa(16:0)+H	AcCa(16:0)+H	AcCa	C23 H46 O4 N1	400.342	A	400.341	-1.92	135.425	400.342	-0.27	134.4	3	3	3.19721	1.93438	8.86508e+06	283435		3	3	1.6899	2.17618	9.40096e+06	158867		3	3	1.76297	2.102	9.01836e+06	158991		3	3	20.9564	1.10193	7.04968e+06	1.47736e+06		3	3	14.2922	3.03379	8.06501e+06
4021	M428T213	428.373	213.214	3.68346e+06	AcCa(18:0)+H	AcCa(18:0)+H	AcCa	C25 H50 O4 N1	428.373	B	428.373	-1.46	213.214	428.373	-0.08	213.51	3	3	9.35446	2.66287	3.2307e+06	302215		3	3	5.18834	1.78683	3.30527e+06	171489		3	3	2.1295	0.747391	3.21445e+06	68451.8		3	3	21.8562	3.47994	2.7052e+06	591253		3	3	16.3106	2.29511	3.27098e+06
3982	M426T149	426.357	149.451	1.29129e+07	AcCa(18:1)+H	AcCa(18:1)+H	AcCa	C25 H48 O4 N1	426.358	B	426.357	-1.53	149.451	426.358	-0.24	149.67	3	3	3.75245	1.04895	1.30646e+07	490241		3	3	6.79566	1.19033	1.39814e+07	950129		3	3	1.9803	1.4062	1.31855e+07	261111		3	3	27.681	2.0212	9.02506e+06	2.49823e+06		3	3	19.5205	0.446906	1.02556e+07
3931	M424T107	424.341	106.952	1.09648e+07	AcCa(18:2)+H	AcCa(18:2)+H	AcCa	C25 H46 O4 N1	424.342	B	424.341	-1.76	106.952	424.342	-0.2	106.8	3	3	2.63047	1.28407	1.1154e+07	293403		3	3	3.52431	1.25754	1.18227e+07	416667		3	3	1.80201	0.713907	1.13203e+07	203993		3	3	23.5303	2.80993	7.73605e+06	1.82032e+06		3	3	16.7827	1.68726	8.78246e+06
1881	M288T39	288.217	39.4576	2.45116e+07	AcCa(8:0)+H	AcCa(8:0)+H	AcCa	C15 H30 O4 N1	288.217	A	288.217	-1.31	39.4576	288.217	-0.07	39.21	3	3	1.20888	1.84048	2.44732e+07	295851		3	3	3.08016	1.56575	2.57639e+07	793569		3	3	1.47351	1.27391	2.45897e+07	362331		3	3	5.60735	2.03616	3.82188e+06	214307		3	3	5.33781	1.5182	3.65187e+06
5542	M539T480	538.519	479.844	2.29396e+06	Cer(d18:1_16:0)+H	Cer(d34:1)+H	Cer	C34 H68 O3 N1	538.519	B	538.519	-1.28	479.844	538.519	-0.08	479.88	0	0	NaN	NaN	NaN	NaN		0	0	NaN	NaN	NaN	NaN		0	0	NaN	NaN	NaN	NaN		3	3	15.139	2.89987	2.3967e+06	362836		3	3	6.21767	5.84319	2.59787e+06
5919	M567T502	566.55	502.159	1.64105e+06	Cer(d18:1_18:0)+H	Cer(d36:1)+H	Cer	C36 H72 O3 N1	566.551	B	566.55	-1.17	502.159	566.551	0.02	502.23	0	0	NaN	NaN	NaN	NaN		0	0	NaN	NaN	NaN	NaN		0	0	NaN	NaN	NaN	NaN		3	3	24.9265	2.6698	1.53255e+06	382012		3	3	13.5956	1.36508	1.79866e+06
6303	M595T522	594.581	521.76	2.0047e+06	Cer(d18:1_20:0)+H	Cer(d38:1)+H	Cer	C38 H76 O3 N1	594.582	B	594.581	-0.92	521.76	594.582	-0.04	521.67	0	0	NaN	NaN	NaN	NaN		0	0	NaN	NaN	NaN	NaN		0	0	NaN	NaN	NaN	NaN		3	3	17.3966	5.43972	1.9426e+06	337946		3	3	16.2105	0.644759	2.30026e+06
6713	M623T539	622.613	538.954	1.4299e+07	Cer(d18:1_22:0)+H	Cer(d40:1)+H	Cer	C40 H80 O3 N1	622.613	B	622.613	-0.68	538.954	622.613	-0.03	538.77	2	2	62.8816	3.46074	57351.8	36063.7		3	3	21.0544	6.03163	84057.2	17697.7		2	1	19.838	NaN	80104.7	15891.2		3	3	22.6064	3.10758	1.65499e+07	3.74133e+06		3	3	19.9301	1.47209	1.94537e+07
6689	M621T523	620.597	522.793	2.33778e+06	Cer(d18:2_22:0)+H	Cer(d40:2)+H	Cer	C40 H78 O3 N1	620.598	B	620.597	-0.54	522.793	620.598	-0.02	522.63	3	2	57.7852	16.2743	90788.9	52462.6		3	3	35.4423	17.923	97989.5	34729.7		3	3	30.6734	1.35678	80131.4	24579		3	3	15.3382	7.23646	2.32716e+06	356945		3	3	19.489	2.06863	2.73589e+06
7061	M649T539	648.628	539.295	1.9528e+07	Cer(d18:1_24:1)+H	Cer(d42:2)+H	Cer	C42 H82 O3 N1	648.629	B	648.628	-0.77	539.295	648.629	-0.05	538.83	3	3	48.2619	0.927092	328707	158640		3	3	27.0463	5.44276	400274	108259		3	3	46.7921	4.88745	292324	136784		3	3	24.4391	2.85028	2.40411e+07	5.87542e+06		3	3	19.1283	2.90083	2.79951e+07
7038	M647T523	646.613	523.052	2.66965e+06	Cer(d18:2_24:1)+H	Cer(d42:3)+H	Cer	C42 H80 O3 N1	646.613	B	646.613	-0.74	523.052	646.613	-0.05	522.9	3	3	52.7372	9.86677	124360	65583.8		3	3	26.8702	1.71819	153475	41239.1		3	3	41.8055	9.94694	108787	45479		3	3	17.5212	3.02559	2.5967e+06	454972		3	3	12.4932	4.52517	2.85e+06
3037	M369T428	369.351	428.103	9.05244e+07	ChE()+H-H2O	ChE()+H-H2O	ChE	C27 H45 O0	369.352	C	369.351	-1.42	428.103	369.352	-0.09	428.37	3	3	7.18856	2.71802	5.3216e+07	3.82547e+06		3	3	1.21758	5.87613	5.32683e+07	648582		3	3	6.21849	1.80938	5.30602e+07	3.29954e+06		3	3	7.03187	7.05783	8.52553e+07	5.99504e+06		3	3	8.72697	0.519971	8.74978e+07
7649	M693T599	692.633	599.227	3.6146e+06	ChE(20:3)+NH4	ChE(20:3)+NH4	ChE	C47 H82 O2 N1	692.634	B	692.633	-1.6	599.227	692.634	-0.18	599.37	3	3	10.5746	4.8524	289946	30660.8		3	3	9.22563	7.4232	284097	26209.8		3	3	21.6134	4.6016	264422	57150.7		3	3	11.1626	4.15732	1.04425e+07	1.16566e+06		3	3	6.57159	2.37585	1.01927e+07
7383	M674T591	673.591	591.023	1.4888e+06	ChE(20:4)+H	ChE(20:4)+H	ChE	C47 H77 O2	673.592	B	673.591	-1.21	591.023	673.592	-0.1	591.24	0	0	NaN	NaN	NaN	NaN		2	3	4.92701	13.374	104556	5151.5		1	0	NaN	NaN	128467	NaN		3	3	4.99392	8.75987	3.14518e+06	157068		3	3	7.24008	4.07728	3.35646e+06
7942	M715T585	714.617	584.627	1.43591e+07	ChE(22:6)+NH4	ChE(22:6)+NH4	ChE	C49 H80 O2 N1	714.618	B	714.617	-1.33	584.627	714.618	-0.11	584.52	3	3	30.8006	3.85051	880326	271146		3	3	8.30384	0.869447	904561	75113.4		3	3	36.4495	1.76689	686891	250368		3	3	6.66539	1.02304	3.64083e+07	2.42675e+06		3	3	8.10933	3.72512	3.90987e+07
10448	M881T573	880.717	572.67	9.48286e+06	Co(Q10)+NH4	Co(Q10)+NH4	Co	C59 H94 O4 N1	880.718	A	880.717	-1.34	572.67	880.718	-0.1	572.67	3	3	46.0873	5.54243	292975	135024		2	3	20.1319	5.47554	242496	48819		3	3	44.6004	2.93303	208077	92803.3		3	3	10.1918	12.4794	2.07354e+07	2.1133e+06		3	3	8.20931	1.94891	2.12186e+07
6130	M583T477	582.509	476.58	4.72112e+06	DG(14:0_18:2)+NH4	DG(32:2)+NH4	DG	C35 H68 O5 N1	582.509	B	582.509	-0.97	476.58	582.509	-0.03	476.25	3	3	28.7865	3.40074	1.36584e+06	393178		3	3	20.5607	5.46571	1.74439e+06	358658		3	3	14.8209	3.32155	1.51078e+06	223911		3	3	17.8801	1.73139	4.13967e+06	740178		3	3	13.9594	0.844589	4.5641e+06
6607	M615T531	614.571	531.257	2.95702e+06	DG(18:0_16:0)+NH4	DG(34:0)+NH4	DG	C37 H76 O5 N1	614.572	B	614.571	-0.62	531.257	614.572	-0.01	531.48	3	3	38.6903	4.54238	214675	83058.5		3	3	15.6497	5.51119	211904	33162.3		3	3	33.5581	5.07333	161666	54252		3	3	21.2584	2.05752	3.80373e+06	808611		3	3	17.4708	0.940475	4.45421e+06
6512	M609T479	608.524	479.093	9.10908e+06	DG(16:0_18:3)+NH4	DG(34:3)+NH4	DG	C37 H70 O5 N1	608.525	B	608.524	-0.94	479.093	608.525	-0.06	478.5	3	3	18.8585	1.82087	3.47226e+06	654815		3	3	10.4148	3.38417	4.30356e+06	448208		3	3	8.24124	0.416592	3.70589e+06	305412		3	3	13.0088	10.05	8.34022e+06	1.08497e+06		3	3	6.23197	2.45607	9.53507e+06
6870	M635T483	634.54	482.824	2.23718e+07	DG(18:2_18:2)+NH4	DG(36:4)+NH4	DG	C39 H72 O5 N1	634.541	A	634.54	-1.48	482.824	634.54	-0.05	482.7	3	3	16.6384	1.93537	8.91283e+06	1.48296e+06		3	3	12.2914	1.31394	1.15959e+07	1.4253e+06		3	3	9.13653	1.31958	9.92766e+06	907044		3	3	12.5749	6.23252	1.84953e+07	2.32577e+06		3	3	10.5254	2.39264	2.03327e+07
6830	M633T469	632.525	468.714	9.6384e+06	DG(18:3_18:2)+NH4	DG(36:5)+NH4	DG	C39 H70 O5 N1	632.525	B	632.525	-0.36	468.714	632.525	-0.12	464.64	3	3	19.5289	3.45648	3.80495e+06	743065		3	3	15.6431	2.97381	4.81763e+06	753627		3	3	8.14982	4.82727	4.23659e+06	345274		3	3	16.072	3.09383	8.2142e+06	1.32019e+06		3	3	14.9327	1.30675	8.84822e+06
7200	M661T495	660.555	494.675	2.06285e+07	DG(20:3_18:2)+NH4	DG(38:5)+NH4	DG	C41 H74 O5 N1	660.556	B	660.555	-1.29	494.675	660.556	-0.11	494.46	3	3	21.6891	6.51647	3.96703e+06	860412		3	3	19.9574	3.02067	5.05132e+06	1.00811e+06		3	3	15.3194	0.743898	4.14307e+06	634693		3	3	23.0642	1.58976	1.76762e+07	4.07686e+06		3	3	18.8712	5.19696	1.93856e+07
7166	M659T477	658.54	476.833	1.67073e+07	DG(18:2_20:4)+NH4	DG(38:6)+NH4	DG	C41 H72 O5 N1	658.541	B	658.54	-1.21	476.833	658.54	-0.06	476.58	3	3	20.593	2.16252	5.04396e+06	1.0387e+06		3	3	17.386	3.83124	6.54928e+06	1.13866e+06		3	3	8.25891	1.25751	5.65835e+06	467318		3	3	20.6371	1.32955	1.4223e+07	2.93521e+06		3	3	13.6402	0.400068	1.57368e+07
7138	M657T459	656.523	458.944	1.96234e+06	DG(20:5_18:2)+NH4	DG(38:7)+NH4	DG	C41 H70 O5 N1	656.525	B	656.523	-2.73	458.944	656.525	-0.11	458.82	3	3	1.06582	1.79612	903836	9633.27		3	3	11.067	3.02637	1.2555e+06	138946		3	3	10.4601	4.84839	1.13933e+06	119176		3	3	16.0273	11.2827	1.54693e+06	247932		3	3	15.6158	1.37459	1.85436e+06
7593	M689T510	688.587	509.948	1.56844e+06	DG(18:1_22:4)+NH4	DG(40:5)+NH4	DG	C43 H78 O5 N1	688.587	B	688.587	-0.75	509.948	688.587	-0.1	509.37	3	3	42.1261	7.45611	150929	63580.4		3	3	22.5586	1.57794	216883	48925.8		3	3	20.2521	6.28367	151389	30659.5		3	3	29.1527	3.66373	1.39973e+06	408060		3	3	18.6254	1.53963	1.63425e+06
7565	M687T494	686.571	494.291	2.99444e+06	DG(18:1_22:5)+NH4	DG(40:6)+NH4	DG	C43 H76 O5 N1	686.572	B	686.571	-1.03	494.291	686.572	-0.23	494.76	3	3	26.8118	4.15569	514076	137833		3	3	32.4504	4.56686	757980	245967		3	3	15.1775	13.2271	578815	87849.4		3	3	25.382	5.27782	2.64462e+06	671258		3	3	14.9854	4.81316	2.89214e+06
7533	M685T477	684.555	476.924	1.35054e+06	DG(22:5_18:2)+NH4	DG(40:7)+NH4	DG	C43 H74 O5 N1	684.556	B	684.555	-1.03	476.924	684.556	-0.13	476.61	1	2	NaN	8.47509	283602	NaN		1	2	NaN	18.9239	462985	NaN		3	2	3.12245	5.54897	398216	12434.1		3	3	27.6785	22.2159	1.08766e+06	301049		2	2	8.28096	4.28254	1.31549e+06
8890	M785T525	784.665	524.524	6.63516e+06	Hex1Cer(d18:1_22:0)+H	Hex1Cer(d40:1)+H	Hex1Cer	C46 H90 O8 N1	784.666	A	784.665	-0.8	524.524	784.666	-0.1	524.16	0	0	NaN	NaN	NaN	NaN		0	0	NaN	NaN	NaN	NaN		0	0	NaN	NaN	NaN	NaN		3	3	19.456	2.41041	6.16288e+06	1.19905e+06		3	3	9.99821	3.09883	7.2968e+06
9094	M799T533	798.681	532.803	3.97403e+06	Hex1Cer(d18:1_23:0)+H	Hex1Cer(d41:1)+H	Hex1Cer	C47 H92 O8 N1	798.682	A	798.681	-0.84	532.803	798.682	-0.04	532.62	0	0	NaN	NaN	NaN	NaN		0	0	NaN	NaN	NaN	NaN		0	0	NaN	NaN	NaN	NaN		3	3	19.4131	2.62776	4.3082e+06	836357		3	3	20.2041	2.98662	5.13217e+06
10170	M863T452	862.623	452.359	9.34297e+06	Hex2Cer(d18:1_16:0)+H	Hex2Cer(d34:1)+H	Hex2Cer	C46 H88 O13 N1	862.625	A	862.623	-1.97	452.359	862.625	-0.22	452.4	2	1	15.5489	NaN	200744	31213.6		2	2	2.58467	7.14163	182681	4721.7		1	1	NaN	NaN	261420	NaN		3	3	25.1652	2.00702	9.60504e+06	2.41713e+06		3	3	17.5243	1.58901	1.12468e+07
11543	M973T518	972.733	517.589	2.89281e+06	Hex2Cer(d18:1_24:1)+H	Hex2Cer(d42:2)+H	Hex2Cer	C54 H102 O13 N1	972.735	A	972.733	-1.31	517.589	972.734	-0.15	517.38	0	0	NaN	NaN	NaN	NaN		0	0	NaN	NaN	NaN	NaN		0	0	NaN	NaN	NaN	NaN		3	3	32.8915	3.4493	2.61687e+06	860729		3	3	27.4535	1.75176	3.20376e+06
4623	M468T86	468.308	86.175	3.29793e+07	LPC(14:0)+H	LPC(14:0)+H	LPC	C22 H47 O7 N1 P1	468.308	B	468.308	-0.47	86.175	468.308	0	85.6749	3	3	4.18158	6.76937	3.18047e+07	1.32994e+06		3	3	4.28051	7.43356	3.41124e+07	1.46019e+06		3	3	3.26119	6.59777	3.22171e+07	1.05066e+06		3	3	23.4199	1.5046	1.79274e+07	4.19857e+06		3	3	11.0841	1.75165	2.0128e+07
4813	M482T107	482.324	106.684	2.21827e+07	LPC(15:0)+H	LPC(15:0)+H	LPC	C23 H49 O7 N1 P1	482.324	B	482.324	-0.98	106.684	482.324	0	106.65	3	3	8.16139	0.862538	2.22715e+07	1.81766e+06		3	3	10.5771	0.604346	2.34653e+07	2.48196e+06		3	3	7.78555	7.83571	2.23554e+07	1.74049e+06		3	3	32.1691	7.56335	1.40678e+07	4.52548e+06		3	3	15.1532	9.299	1.46056e+07
4989	M496T135	496.339	134.849	3049629256	LPC(16:0)+H	LPC(16:0)+H	LPC	C24 H51 O7 N1 P1	496.34	B	496.339	-0.8	134.849	496.34	-0.06	134.55	3	3	9.63786	9.10742	2.94478e+09	2.83814e+08		3	3	13.854	10.3083	3.14171e+09	4.35253e+08		3	3	9.75009	11.0263	3.04448e+09	2.96839e+08		3	3	23.37	1.82048	2.16564e+09	5.06111e+08		3	3	12.8108	1.72665	2.3996e+09
4818	M482T165	482.36	165.285	2.82402e+07	LPC(16:0e)+H	LPC(16:0e)+H	LPC	C24 H53 O6 N1 P1	482.361	B	482.36	-0.31	165.285	482.361	0.01	164.91	3	3	6.96203	0.835707	2.60935e+07	1.81664e+06		3	3	4.33857	0.629684	2.72015e+07	1.18015e+06		3	3	1.53034	0.886263	2.67753e+07	409752		3	3	25.6861	2.40435	1.94101e+07	4.9857e+06		3	3	16.2408	0.717823	2.20093e+07
5168	M510T173	510.355	172.611	5.30724e+07	LPC(17:0)+H	LPC(17:0)+H	LPC	C25 H53 O7 N1 P1	510.355	B	510.355	-0.05	172.611	510.355	0	172.56	3	3	22.3363	14.8714	4.10345e+07	9.1656e+06		3	3	14.995	26.9274	4.71404e+07	7.06871e+06		3	3	1.4488	0.222481	4.94417e+07	716312		3	3	24.7707	2.04424	3.90424e+07	9.67106e+06		3	3	16.3634	0.53725	4.439e+07
5138	M508T118	508.34	118.103	5.05573e+06	LPC(17:1)+H	LPC(17:1)+H	LPC	C25 H51 O7 N1 P1	508.34	B	508.34	-0.23	118.103	508.34	-0.01	118.02	3	3	2.43886	2.4438	5.01243e+06	122246		3	3	3.1596	0.800716	5.35469e+06	169187		3	3	2.88362	1.29558	5.08662e+06	146679		3	3	25.5659	0.728371	3.43047e+06	877031		3	3	16.1742	0.823084	3.85685e+06
5351	M524T214	524.371	214.461	1084560870	LPC(18:0)+H	LPC(18:0)+H	LPC	C26 H55 O7 N1 P1	524.371	B	524.371	-0.41	214.461	524.371	0	214.23	3	3	9.85335	2.38238	8.74438e+08	8.61615e+07		3	3	5.7375	2.11648	9.13232e+08	5.23967e+07		3	3	3.14313	1.17594	8.90963e+08	2.80042e+07		3	3	22.5606	2.61715	8.11679e+08	1.8312e+08		3	3	17.6843	1.11567	9.43186e+08
5174	M510T251	510.392	251.156	7.68058e+06	LPC(18:0e)+H	LPC(18:0e)+H	LPC	C26 H57 O6 N1 P1	510.392	B	510.392	0.09	251.156	510.392	-0.01	250.41	3	3	14.1844	1.40889	5.69778e+06	808195		3	3	7.38368	1.05909	5.599e+06	413412		3	3	5.4788	1.43427	5.6461e+06	309338		3	3	22.257	3.26088	5.37476e+06	1.19626e+06		3	3	18.8371	1.58261	6.23673e+06
5318	M522T150	522.355	149.608	4.98198e+08	LPC(18:1)+H	LPC(18:1)+H	LPC	C26 H53 O7 N1 P1	522.355	B	522.355	-0.47	149.608	522.355	0	149.7	3	3	3.96084	3.66674	4.95619e+08	1.96307e+07		3	3	3.49529	1.07413	5.09165e+08	1.77968e+07		3	3	4.33452	1.00422	5.02703e+08	2.17898e+07		3	3	26.3317	1.69332	3.49244e+08	9.19618e+07		3	3	16.5897	1.29533	3.96946e+08
5140	M508T244	508.376	244.228	4.64006e+06	LPC(18:1e)+H	LPC(18:1e)+H	LPC	C26 H55 O6 N1 P1	508.376	B	508.376	0.26	244.228	508.376	-0.13	244.05	3	3	10.4196	0.327285	3.5165e+06	366406		3	3	4.59188	2.67409	3.71363e+06	170525		3	3	4.90823	0.071289	3.62465e+06	177906		3	3	24.9873	2.94545	3.26405e+06	815598		3	3	18.6977	2.62517	3.77271e+06
5141	M508T181	508.376	181.318	1.58105e+07	LPC(18:1e)+H	LPC(18:1e)+H	LPC	C26 H55 O6 N1 P1	508.376	B	508.376	0.03	181.318	508.376	-0.09	180.63	3	3	3.64204	1.15274	1.54967e+07	564397		3	3	3.81829	1.04077	1.63932e+07	625939		3	3	0.227722	0.894894	1.56726e+07	35690.1		3	3	27.2615	0.417338	1.08205e+07	2.94983e+06		3	3	18.2471	4.19492	1.23083e+07
5260	M518T83	518.324	82.6819	1.47982e+07	LPC(18:3)+H	LPC(18:3)+H	LPC	C26 H49 O7 N1 P1	518.324	B	518.324	-0.15	82.6819	518.324	-0.07	85.68	3	3	1.15974	1.86952	1.49716e+07	173632		3	3	4.40963	2.06502	1.56792e+07	691394		3	3	0.743316	1.44222	1.50594e+07	111939		3	3	24.5211	1.56401	9.66238e+06	2.36932e+06		3	3	15.1478	1.87296	1.10605e+07
5536	M538T256	538.387	256.455	3.15428e+06	LPC(19:0)+H	LPC(19:0)+H	LPC	C27 H57 O7 N1 P1	538.387	B	538.387	0.04	256.455	538.387	-0.05	256.35	3	3	40.1677	26.5488	2.08531e+06	837622		3	3	23.9614	23.8646	2.4607e+06	589620		3	3	5.21549	22.3529	2.73585e+06	142688		3	3	34.852	27.5981	2.3325e+06	812924		3	3	17.4632	0.498362	3.40152e+06
5748	M552T294	552.402	293.956	4.00857e+06	LPC(20:0)+H	LPC(20:0)+H	LPC	C28 H59 O7 N1 P1	552.402	B	552.402	0.07	293.956	552.402	0.06	294	3	3	16.5786	0.324815	2.298e+06	380977		3	3	9.34212	0.953095	2.37379e+06	221762		3	3	7.66124	2.70791	2.33177e+06	178643		3	3	25.3963	1.51173	3.22177e+06	818211		3	3	18.1974	1.30762	3.6812e+06
5715	M550T229	550.387	228.812	7.66741e+06	LPC(20:1)+H	LPC(20:1)+H	LPC	C28 H57 O7 N1 P1	550.387	B	550.387	-0.18	228.812	550.387	-0.06	228.66	3	3	5.72853	0.784223	6.81175e+06	390213		3	3	5.76142	0.594058	7.31905e+06	421681		3	3	3.28177	2.17407	7.05076e+06	231390		3	3	23.952	2.93234	5.67014e+06	1.35811e+06		3	3	19.2669	0.663235	6.63457e+06
5680	M548T168	548.371	167.538	8.43938e+06	LPC(20:2)+H	LPC(20:2)+H	LPC	C28 H55 O7 N1 P1	548.371	B	548.371	-0.24	167.538	548.371	-0.06	167.28	3	3	5.06721	1.02417	8.25316e+06	418205		3	3	4.10166	1.16808	8.7884e+06	360470		3	3	1.79669	0.945493	8.50426e+06	152796		3	3	26.8349	1.80131	6.08459e+06	1.6328e+06		3	3	17.6095	0.880001	7.01896e+06
5645	M546T125	546.355	124.693	5.98148e+07	LPC(20:3)+H	LPC(20:3)+H	LPC	C28 H53 O7 N1 P1	546.355	B	546.355	-0.66	124.693	546.355	-0.09	124.62	3	3	2.88419	1.0067	5.89717e+07	1.70086e+06		3	3	4.50962	1.41896	6.26334e+07	2.82452e+06		3	3	0.0556699	0.629455	6.0987e+07	33951.4		3	3	25.5221	1.75952	4.18521e+07	1.06815e+07		3	3	18.6468	0.316498	4.72811e+07
5646	M546T113	546.355	113.454	6.34891e+06	LPC(20:3)+H	LPC(20:3)+H	LPC	C28 H53 O7 N1 P1	546.355	B	546.355	0	113.454	546.355	-0.12	114.6	3	3	3.64645	1.77039	5.9373e+06	216501		3	3	3.97602	1.26201	6.39974e+06	254455		3	3	1.08313	2.22789	6.04187e+06	65441.4		2	3	35.8618	0.90183	3.4001e+06	1.21933e+06		3	3	17.8635	1.13165	3.95192e+06
5624	M544T102	544.339	102.489	2.48524e+08	LPC(20:4)+H	LPC(20:4)+H	LPC	C28 H51 O7 N1 P1	544.34	B	544.339	-0.56	102.489	544.34	-0.01	102.145	3	3	6.62682	6.37618	2.44449e+08	1.61992e+07		3	3	11.0877	7.3379	2.6463e+08	2.93414e+07		3	3	4.75716	5.34063	2.60779e+08	1.24057e+07		3	3	24.3548	2.24587	1.65251e+08	4.02467e+07		3	3	15.6979	0.871727	1.86721e+08
5598	M542T79	542.324	79.3799	1.53222e+07	LPC(20:5)+H	LPC(20:5)+H	LPC	C28 H49 O7 N1 P1	542.324	B	542.324	-0.27	79.3799	542.324	-0.02	74.25	3	3	1.74563	1.3678	1.54675e+07	270005		3	3	4.25011	1.31251	1.62851e+07	692135		3	3	2.3031	1.13466	1.57756e+07	363328		3	3	24.4697	3.80235	1.01632e+07	2.48689e+06		3	3	14.9998	0.840724	1.18429e+07
5997	M572T148	572.371	148.111	5.25968e+06	LPC(22:4)+H	LPC(22:4)+H	LPC	C30 H55 O7 N1 P1	572.371	B	572.371	-0.92	148.111	572.371	-0.12	147.99	3	3	2.613	1.13225	5.2544e+06	137298		3	3	12.3525	1.86103	6.14057e+06	758516		3	3	7.32215	1.31413	5.57469e+06	408187		3	3	25.5651	2.58136	3.76245e+06	961874		3	3	18.5851	0.750205	4.27168e+06
6507	M608T403	608.465	403.372	2.34902e+06	LPC(24:0)+H	LPC(24:0)+H	LPC	C32 H67 O7 N1 P1	608.465	B	608.465	-0.28	403.372	608.465	0.01	403.11	3	3	26.2601	2.52477	658123	172824		3	3	10.4021	0.384053	676883	70410.1		3	3	14.159	2.04824	660067	93458.9		3	3	24.2109	0.79447	2.15018e+06	520579		3	3	18.6124	0.421958	2.48169e+06
5995	M572T109	572.334	108.772	1.7588e+06	PC(21:4)+H	PC(21:4)+H	PC	C29 H51 O8 N1 P1	572.335	C	572.334	-1.11	108.772	572.334	-0.33	108.09	0	0	NaN	NaN	NaN	NaN		0	0	NaN	NaN	NaN	NaN		0	0	NaN	NaN	NaN	NaN		3	3	31.8747	2.49463	7.28398e+06	2.32175e+06		3	3	27.6139	0.491991	1.12908e+07
7445	M679T426	678.506	426.175	6.43674e+06	PC(28:0)+H	PC(28:0)+H	PC	C36 H73 O8 N1 P1	678.507	C	678.506	-1.47	426.175	678.507	-0.06	426.12	3	3	33.2241	2.37429	1.70922e+06	567871		3	3	11.746	3.31357	1.95195e+06	229275		3	3	13.3047	2.95317	1.76008e+06	234173		3	3	21.5181	2.36531	5.96457e+06	1.28346e+06		3	3	14.9595	1.59207	6.62949e+06
7835	M707T455_1	706.536	454.797	3.75901e+07	PC(30:0)+H	PC(30:0)+H	PC	C38 H77 O8 N1 P1	706.538	C	706.536	-2.34	454.797	706.538	-0.16	454.65	3	3	35.5151	0.773683	1.27154e+07	4.51588e+06		3	3	13.9906	2.9069	1.3148e+07	1.83949e+06		3	3	13.799	1.40373	1.19058e+07	1.64289e+06		3	3	14.0868	1.62763	3.39575e+07	4.78353e+06		3	3	4.58094	0.80041	3.62801e+07
7802	M705T429	704.521	429.169	1.16685e+07	PC(30:1)+H	PC(30:1)+H	PC	C38 H75 O8 N1 P1	704.522	C	704.521	-1.59	429.169	704.522	-0.08	428.97	3	3	25.9997	2.73763	5.5379e+06	1.43984e+06		3	3	12.6344	0.392101	6.35565e+06	802996		3	3	11.3553	0.516808	5.96924e+06	677824		3	3	22.9309	2.69349	8.4539e+06	1.93855e+06		3	3	20.3035	1.09927	9.46433e+06
7620	M691T469	690.542	468.85	1.83574e+06	PC(30:1e)+H	PC(30:1e)+H	PC	C38 H77 O7 N1 P1	690.543	C	690.542	-1.05	468.85	690.543	-0.01	468.36	3	2	23.5528	3.4525	350022	82439.9		0	0	NaN	NaN	NaN	NaN		1	0	NaN	NaN	475204	NaN		3	3	22.2594	6.45262	1.61222e+06	358869		3	3	14.5052	2.25433	1.95254e+06
7957	M717T465	716.522	465.304	1.82252e+07	PC(31:2)+H	PC(31:2)+H	PC	C39 H75 O8 N1 P1	716.522	C	716.522	-1.27	465.304	716.522	-0.08	465.36	3	3	20.9808	1.93661	3.8032e+06	797943		3	3	16.7055	2.76693	4.41064e+06	736819		3	3	13.3641	5.26442	3.95841e+06	529007		3	3	23.1312	0.449827	1.62061e+07	3.74867e+06		3	3	16.3205	2.3335	1.76714e+07
8210	M735T480	734.569	479.785	1.9195e+08	PC(32:0)+H	PC(32:0)+H	PC	C40 H81 O8 N1 P1	734.569	C	734.569	-1.26	479.785	734.569	-0.11	479.49	3	3	32.2004	0.795882	3.99641e+07	1.28686e+07		3	3	10.0706	0.647972	3.85034e+07	3.87755e+06		3	3	15.7591	2.00679	3.59124e+07	5.65947e+06		3	3	13.5952	1.19877	1.8263e+08	2.48289e+07		3	3	7.3308	0.903352	1.95677e+08
8029	M721T497	720.589	496.517	6.01757e+07	PC(32:0e)+H	PC(32:0e)+H	PC	C40 H83 O7 N1 P1	720.59	C	720.589	-1.31	496.517	720.59	-0.15	496.02	3	3	36.0424	0.877718	5.24261e+06	1.88956e+06		3	3	12.1143	2.17422	5.09522e+06	617253		3	3	19.4312	1.07361	4.87925e+06	948098		3	3	21.4971	1.7256	5.94349e+07	1.27768e+07		3	3	16.0861	0.0759605	6.64867e+07
8181	M733T458	732.552	457.698	1.63802e+08	PC(32:1)+H	PC(32:1)+H	PC	C40 H79 O8 N1 P1	732.554	C	732.552	-1.77	457.698	732.554	-0.18	457.41	3	3	15.9504	1.69115	7.75107e+07	1.23633e+07		3	3	8.22229	1.45517	8.71521e+07	7.1659e+06		3	3	8.09165	2.59318	8.15894e+07	6.60193e+06		3	3	14.4435	2.49093	1.46369e+08	2.11408e+07		3	3	8.42249	0.874611	1.56754e+08
7998	M719T476	718.573	475.569	1.17208e+07	PC(32:1e)+H	PC(32:1e)+H	PC	C40 H81 O7 N1 P1	718.575	C	718.573	-2.29	475.569	718.574	-0.2	475.95	2	3	31.6734	0.368957	3.94416e+06	1.24925e+06		3	3	12.8322	1.80587	4.12563e+06	529407		1	1	NaN	NaN	4.31294e+06	NaN		3	3	22.5627	2.91139	1.04151e+07	2.34992e+06		3	3	13.1857	1.84609	1.12646e+07
7999	M719T493	718.574	493.112	5.15021e+07	PC(32:1e)+H	PC(32:1e)+H	PC	C40 H81 O7 N1 P1	718.575	C	718.574	-1.32	493.112	718.574	-0.03	492.75	3	3	34.2848	2.3166	7.23378e+06	2.48009e+06		3	3	12.1464	1.76051	6.12937e+06	744499		3	3	17.0168	27.3113	7.81831e+06	1.33043e+06		3	3	20.9315	1.38271	4.97725e+07	1.04181e+07		3	3	14.3524	1.79558	5.49519e+07
8157	M731T435	730.537	435.105	1.04937e+08	PC(32:2)+H	PC(32:2)+H	PC	C40 H77 O8 N1 P1	730.538	C	730.537	-1.26	435.105	730.538	-0.14	434.82	3	3	17.6583	1.86338	4.77842e+07	8.4379e+06		3	3	12.2951	0.641263	5.59911e+07	6.88414e+06		3	3	8.50752	1.21387	5.23564e+07	4.45423e+06		3	3	23.3148	3.13568	8.29351e+07	1.93361e+07		3	3	18.655	1.04127	9.44169e+07
8136	M729T412	728.522	411.568	2.33737e+06	PC(32:3)+H	PC(32:3)+H	PC	C40 H75 O8 N1 P1	728.522	C	728.522	-0.72	411.568	728.523	0.05	411.57	3	3	13.0511	0.972831	1.35071e+06	176282		3	3	10.1806	0.948662	1.55185e+06	157987		3	3	6.56204	0.478773	1.46713e+06	96273.3		2	3	31.5223	2.28824	1.76399e+06	556049		3	1	17.0697	NaN	2.07995e+06
8391	M749T489	748.585	488.578	1.5831e+07	PC(33:0)+H	PC(33:0)+H	PC	C41 H83 O8 N1 P1	748.585	C	748.585	-0.53	488.578	748.585	-0.17	487.44	3	3	35.4992	4.21188	2.30634e+06	818733		3	3	12.3134	3.00595	2.48188e+06	305604		3	3	16.1491	2.49052	2.20602e+06	356253		3	3	16.3663	1.08693	1.52383e+07	2.49395e+06		3	3	13.6359	0.718813	1.6695e+07
8364	M747T470	746.568	470.436	5.37513e+07	PC(33:1)+H	PC(33:1)+H	PC	C41 H81 O8 N1 P1	746.569	C	746.568	-1.55	470.436	746.569	-0.12	470.34	3	3	23.1595	0.861371	1.78081e+07	4.12427e+06		3	3	13.1444	2.60937	2.05574e+07	2.70215e+06		3	3	13.4015	1.38305	1.89007e+07	2.53297e+06		3	3	17.3496	4.07343	4.86366e+07	8.43825e+06		3	3	13.3679	0.902454	5.33784e+07
8336	M745T449	744.553	449.319	7.81355e+07	PC(33:2)+H	PC(33:2)+H	PC	C41 H79 O8 N1 P1	744.554	C	744.553	-1.42	449.319	744.554	-0.04	449.04	3	3	17.7145	1.46165	3.09137e+07	5.47621e+06		3	3	9.51266	0.225816	3.66122e+07	3.48279e+06		3	3	9.78873	2.04589	3.37914e+07	3.30775e+06		3	3	23.3847	2.96603	6.44394e+07	1.5069e+07		3	3	16.2913	2.46524	7.42301e+07
8531	M761T482	760.584	481.782	2699691018	PC(34:1)+H	PC(34:1)+H	PC	C42 H83 O8 N1 P1	760.585	C	760.584	-1.48	481.782	760.585	-0.15	481.68	3	3	4.46329	23.4771	1.2909e+09	5.76167e+07		3	3	9.24046	21.0074	1.67328e+09	1.54619e+08		3	3	11.639	22.8127	1.03361e+09	1.20302e+08		3	3	11.9522	2.78024	2.45679e+09	2.93641e+08		3	3	7.85985	1.61016	2.65664e+09
8366	M747T498	746.605	498.055	1.3989e+08	PC(34:1e)+H	PC(34:1e)+H	PC	C42 H85 O7 N1 P1	746.606	C	746.605	-1.28	498.055	746.606	-0.15	497.58	3	3	27.8675	1.04024	2.3811e+07	6.63552e+06		3	3	14.4842	1.33873	2.84558e+07	4.12159e+06		3	3	16.4061	0.788453	2.48395e+07	4.07519e+06		3	3	23.6031	1.81477	1.261e+08	2.97634e+07		3	3	15.3142	0.450549	1.41311e+08
8499	M759T462	758.568	461.788	5933761824	PC(34:2)+H	PC(34:2)+H	PC	C42 H81 O8 N1 P1	758.569	C	758.568	-1.33	461.788	758.569	-0.11	461.34	3	3	9.10419	0.703526	3.01183e+09	2.74203e+08		3	3	8.3754	2.33311	3.4007e+09	2.84823e+08		3	3	7.70247	1.67418	3.18767e+09	2.45529e+08		3	3	13.6867	0.122598	5.4849e+09	7.507e+08		3	3	7.60581	1.63836	5.84816e+09
8342	M745T478	744.589	478.295	1.57109e+08	PC(34:2e)+H	PC(34:2e)+H	PC	C42 H83 O7 N1 P1	744.59	C	744.589	-2.15	478.295	744.59	-0.13	478.29	3	3	37.086	0.167957	6.48622e+07	2.40548e+07		3	3	27.0722	1.65201	7.25698e+07	1.96462e+07		3	3	10.7535	0.699805	6.00031e+07	6.4524e+06		3	3	23.449	4.8733	1.3185e+08	3.09175e+07		3	3	10.2522	1.19295	1.36287e+08
8474	M757T442	756.553	441.617	4.77338e+08	PC(34:3)+H	PC(34:3)+H	PC	C42 H79 O8 N1 P1	756.554	C	756.553	-1.18	441.617	756.554	-0.06	442.05	3	3	15.4301	2.20799	2.21236e+08	3.41371e+07		3	3	10.8128	1.28196	2.59907e+08	2.81034e+07		3	3	7.72285	0.442952	2.4356e+08	1.88098e+07		3	3	23.1634	1.69288	3.91861e+08	9.07684e+07		3	3	17.1859	0.632899	4.41874e+08
8451	M755T429	754.537	428.841	1.05094e+08	PC(34:4)+H	PC(34:4)+H	PC	C42 H77 O8 N1 P1	754.538	C	754.537	-1.56	428.841	754.538	-0.13	428.88	3	3	22.2171	2.01548	5.32842e+07	1.18382e+07		3	3	13.3825	1.33865	6.43096e+07	8.60621e+06		3	3	10.1479	0.476509	5.91465e+07	6.00212e+06		3	3	21.8703	2.03776	7.71157e+07	1.68654e+07		3	3	15.9553	0.636964	8.46745e+07
8730	M775T493	774.6	493.029	9.58905e+07	PC(35:1)+H	PC(35:1)+H	PC	C43 H85 O8 N1 P1	774.601	C	774.6	-1.47	493.029	774.601	-0.05	493.14	3	3	29.2105	2.86807	1.80966e+07	5.28611e+06		3	3	16.3855	2.01891	2.2275e+07	3.64986e+06		3	3	18.1944	2.45841	1.9001e+07	3.45711e+06		3	3	21.2196	2.47861	8.54154e+07	1.81248e+07		3	3	16.6326	1.85418	9.72034e+07
8698	M773T474	772.584	474.191	2.32112e+08	PC(35:2)+H	PC(35:2)+H	PC	C43 H83 O8 N1 P1	772.585	C	772.584	-1.66	474.191	772.585	-0.08	470.64	3	3	21.9371	2.83506	7.67513e+07	1.6837e+07		3	3	13.3537	2.42749	8.7541e+07	1.169e+07		3	3	11.2078	0.379798	8.05485e+07	9.02769e+06		3	3	19.507	3.23473	2.07969e+08	4.05685e+07		3	3	9.482	1.37595	2.29916e+08
8667	M771T452	770.568	452.417	2.59564e+07	PC(35:3)+H	PC(35:3)+H	PC	C43 H81 O8 N1 P1	770.569	C	770.568	-1.73	452.417	770.569	-0.13	451.47	3	3	14.4118	2.26236	1.23388e+07	1.77824e+06		3	3	12.2476	1.71305	1.46847e+07	1.79853e+06		3	3	9.53221	2.49603	1.37251e+07	1.30831e+06		3	3	18.804	1.83606	2.11999e+07	3.98644e+06		3	3	12.6326	1.19624	2.37994e+07
8634	M769T444	768.553	443.509	3.78664e+07	PC(35:4)+H	PC(35:4)+H	PC	C43 H79 O8 N1 P1	768.554	C	768.553	-1.21	443.509	768.554	-0.26	443.34	3	3	14.3539	2.38394	1.75078e+07	2.51306e+06		3	3	12.1716	0.95483	2.04385e+07	2.48769e+06		3	3	6.63239	1.12154	1.9126e+07	1.26851e+06		3	3	19.6438	6.18561	3.19224e+07	6.27079e+06		3	3	14.9445	5.78447	3.51569e+07
8765	M777T537	776.652	536.756	1.27124e+06	PC(36:0e)+H	PC(36:0e)+H	PC	C44 H91 O7 N1 P1	776.653	C	776.652	-1.45	536.756	776.653	-0.03	533.79	0	0	NaN	NaN	NaN	NaN		0	0	NaN	NaN	NaN	NaN		0	0	NaN	NaN	NaN	NaN		3	3	24.0716	3.78139	1.16933e+06	281476		3	3	19.0433	4.19365	1.3546e+06
8933	M789T504	788.615	503.507	8.85669e+08	PC(36:1)+H	PC(36:1)+H	PC	C44 H87 O8 N1 P1	788.616	C	788.615	-1.32	503.507	788.616	-0.1	503.04	3	3	31.3232	1.10605	1.37768e+08	4.31535e+07		3	3	16.4443	1.82152	1.62243e+08	2.66797e+07		3	3	16.4982	1.07946	1.3752e+08	2.26883e+07		3	3	19.3292	2.83877	7.76476e+08	1.50087e+08		3	3	11.5325	1.04002	8.60027e+08
8913	M787T486	786.6	485.764	4085935064	PC(36:2)+H	PC(36:2)+H	PC	C44 H85 O8 N1 P1	786.601	C	786.6	-1.31	485.764	786.601	-0.13	485.37	3	3	21.2729	1.29327	1.40808e+09	2.99539e+08		3	3	9.50135	1.20197	1.64038e+09	1.55858e+08		3	3	11.7887	0.717603	1.48438e+09	1.7499e+08		3	3	14.8264	0.925247	3.86761e+09	5.73426e+08		3	3	8.06998	0.829522	4.09397e+09
8701	M773T501	772.62	500.796	7.51705e+07	PC(36:2e)+H	PC(36:2e)+H	PC	C44 H87 O7 N1 P1	772.621	C	772.62	-1.78	500.796	772.621	-0.15	500.91	3	3	26.6711	0.938536	1.48872e+07	3.97057e+06		3	3	14.0433	1.53975	1.85416e+07	2.60385e+06		3	3	13.6585	0.292045	1.5778e+07	2.15504e+06		3	3	21.9666	3.7246	6.5419e+07	1.43703e+07		3	3	14.442	0.340228	7.29704e+07
8884	M785T468	784.584	467.508	3023604961	PC(36:3)+H	PC(36:3)+H	PC	C44 H83 O8 N1 P1	784.585	C	784.584	-1.51	467.508	784.585	-0.14	467.76	3	3	13.5106	1.02024	1.30057e+09	1.75715e+08		3	3	11.0813	2.16262	1.52643e+09	1.69149e+08		3	3	8.9406	1.93997	1.44177e+09	1.28903e+08		3	3	18.5176	0.951617	2.70615e+09	5.01114e+08		3	3	12.2267	0.13426	2.87539e+09
8670	M771T498	770.605	497.925	8.07219e+07	PC(36:3e)+H	PC(36:3e)+H	PC	C44 H85 O7 N1 P1	770.606	C	770.605	-1.41	497.925	770.606	0	497.7	0	1	NaN	NaN	NaN	NaN		1	2	NaN	2.10417	1.59789e+07	NaN		0	0	NaN	NaN	NaN	NaN		3	3	23.137	0.964402	6.85601e+07	1.58628e+07		3	3	16.4794	0.286277	7.62051e+07
8852	M783T457	782.568	456.547	3862946008	PC(36:4)+H	PC(36:4)+H	PC	C44 H81 O8 N1 P1	782.569	C	782.568	-1.53	456.547	782.567	-2.93	456.39	3	3	8.81911	12.0009	2.24705e+09	1.9817e+08		3	3	7.90993	12.894	2.45821e+09	1.94442e+08		3	3	6.87826	2.3133	2.28918e+09	1.57456e+08		3	3	13.13	14.1698	3.33005e+09	4.37236e+08		3	3	8.85383	11.6875	4.42375e+09
8853	M783T443	782.568	442.947	7.69563e+08	PC(36:4)+H	PC(36:4)+H	PC	C44 H81 O8 N1 P1	782.569	C	782.568	-1.55	442.947	782.567	-2.91	442.83	2	2	10.5785	1.42228	3.99079e+08	4.22167e+07		2	2	7.77499	0.847229	4.27853e+08	3.32656e+07		3	3	6.53657	0.540727	4.17229e+08	2.72724e+07		3	1	23.5718	NaN	6.17716e+08	1.45606e+08		0	1	NaN	NaN	NaN
8638	M769T473	768.589	473.38	4.98392e+08	PC(36:4e)+H	PC(36:4e)+H	PC	C44 H83 O7 N1 P1	768.59	C	768.589	-1.38	473.38	768.59	-0.05	472.98	3	3	18.391	1.30998	1.95799e+08	3.60094e+07		3	3	11.5754	2.66335	2.28203e+08	2.64155e+07		3	3	10.9193	2.21762	2.13185e+08	2.32783e+07		3	3	19.3047	2.54878	4.32018e+08	8.33997e+07		3	3	11.9794	1.60383	4.6907e+08
8821	M781T437	780.553	437.172	5.51011e+08	PC(36:5)+H	PC(36:5)+H	PC	C44 H79 O8 N1 P1	780.554	C	780.553	-1.41	437.172	780.554	-0.06	431.315	3	3	14.4635	2.37385	2.50878e+08	3.62857e+07		3	3	8.20413	5.57091	3.1128e+08	2.55378e+07		3	3	7.30919	0.318133	2.81873e+08	2.06026e+07		3	3	24.475	1.06923	4.67936e+08	1.14527e+08		3	3	25.3916	7.64284	5.09731e+08
8609	M767T469	766.574	468.865	3.28571e+08	PC(36:5e)+H	PC(36:5e)+H	PC	C44 H81 O7 N1 P1	766.575	C	766.574	-1.14	468.865	766.575	0.28	468.75	3	3	13.2497	0.665184	1.49333e+08	1.97861e+07		3	3	11.0325	1.74571	1.76178e+08	1.94368e+07		3	3	9.10436	2.34809	1.68803e+08	1.53684e+07		3	3	17.2832	2.29514	2.8905e+08	4.9957e+07		3	3	13.0187	0.165955	3.14558e+08
8796	M779T419	778.538	419.134	1.04374e+07	PC(36:6)+H	PC(36:6)+H	PC	C44 H77 O8 N1 P1	778.538	C	778.538	-0.75	419.134	778.536	-2.83	419.31	2	2	6.18602	7.49707	5.34035e+06	330355		3	3	10.1458	1.78141	6.46204e+06	655625		2	2	2.01684	10.0279	6.44035e+06	129891		2	2	26.5332	1.05844	6.85787e+06	1.81961e+06		3	3	19.7365	13.818	8.71989e+06
8579	M765T450	764.557	449.789	2.42932e+07	PC(36:6e)+H	PC(36:6e)+H	PC	C44 H79 O7 N1 P1	764.559	C	764.557	-1.82	449.789	764.559	0.17	449.52	3	3	14.2713	2.6366	1.06417e+07	1.51871e+06		3	3	9.51777	0.830923	1.29796e+07	1.23537e+06		3	3	7.68086	1.08152	1.21168e+07	930676		3	3	22.9917	2.70128	1.96882e+07	4.52664e+06		3	3	17.9151	5.73174	2.23343e+07
9162	M803T513	802.631	513.354	7.58945e+06	PC(37:1)+H	PC(37:1)+H	PC	C45 H89 O8 N1 P1	802.632	C	802.631	-1.08	513.354	802.632	-0.17	512.61	3	3	35.802	3.60758	775744	277732		3	3	19.0589	4.54132	901944	171901		3	3	24.3726	2.92653	786318	191646		3	3	23.3683	1.72927	6.91924e+06	1.61691e+06		3	3	17.8811	0.688148	7.93874e+06
9128	M801T497	800.615	496.739	3.22519e+07	PC(37:2)+H	PC(37:2)+H	PC	C45 H87 O8 N1 P1	800.616	C	800.615	-2.05	496.739	800.616	-0.12	496.62	3	3	28.4694	3.38647	5.68914e+06	1.61966e+06		3	3	16.7263	1.71195	7.0068e+06	1.17198e+06		3	3	16.5716	2.44905	6.03217e+06	999630		3	3	22.2187	3.16717	2.89398e+07	6.43004e+06		3	3	12.8992	2.28884	3.27514e+07
9044	M797T469	796.583	468.809	1.09899e+08	PC(37:4)+H	PC(37:4)+H	PC	C45 H83 O8 N1 P1	796.585	C	796.583	-2.78	468.809	796.585	-0.31	469.65	3	3	13.2379	6.45537	4.79443e+07	6.3468e+06		3	3	15.1655	6.57442	5.92687e+07	8.98841e+06		3	3	9.41933	6.2437	5.10387e+07	4.8075e+06		3	3	16.7218	2.97423	9.59141e+07	1.60385e+07		3	3	12.3372	0.856438	1.05032e+08
8827	M781T478	780.589	477.73	2.48965e+07	PC(37:5e)+H	PC(37:5e)+H	PC	C45 H83 O7 N1 P1	780.59	C	780.589	-1.51	477.73	780.59	0.33	477	3	3	14.8823	1.48515	9.48357e+06	1.41137e+06		3	3	15.4073	2.22283	1.17426e+07	1.80922e+06		3	3	8.19589	0.714679	1.05427e+07	864072		3	3	20.1667	2.849	2.074e+07	4.18257e+06		3	3	12.5926	0.849838	2.32569e+07
8981	M793T434	792.552	434.353	9.5787e+06	PC(37:6)+H	PC(37:6)+H	PC	C45 H79 O8 N1 P1	792.554	C	792.552	-1.87	434.353	792.554	-0.17	434.16	3	3	16.0656	11.1519	4.63035e+06	743896		3	3	12.9968	1.44983	5.7663e+06	749434		3	3	8.639	0.71927	5.24544e+06	453154		2	3	8.41669	4.0787	8.05867e+06	678273		3	3	18.2514	1.07077	8.22352e+06
9341	M813T491	812.615	491.172	1364929077	PC(38:3)+H	PC(38:3)+H	PC	C46 H87 O8 N1 P1	812.616	C	812.615	-1.68	491.172	812.616	-0.18	490.74	3	3	56.9032	3.09011	3.22569e+08	1.83552e+08		3	3	13.6982	0.236546	3.17607e+08	4.35066e+07		3	3	33.066	0.462789	3.30006e+08	1.0912e+08		3	3	13.4433	19.1182	1.26187e+09	1.69637e+08		3	3	6.16159	18.2817	1.3958e+09
9088	M799T507	798.635	506.642	2.32426e+07	PC(38:3e)+H	PC(38:3e)+H	PC	C46 H89 O7 N1 P1	798.637	C	798.635	-2.11	506.642	798.637	-0.13	504.9	3	3	27.4913	2.09707	4.39839e+06	1.20918e+06		3	3	14.7131	2.05266	5.29687e+06	779331		3	2	13.9732	0.0197412	4.57099e+06	638712		3	3	20.6142	3.20756	2.0616e+07	4.24983e+06		3	3	14.4556	2.3413	2.33528e+07
9686	M833T480	832.581	479.705	102082953	PC(38:4)+Na	PC(38:4)+Na	PC	C46 H84 O8 N1 P1 Na1	832.583	C	832.581	-2.41	479.705	832.583	-0.07	474.957	3	3	8.7004	8.09749	1.05132e+08	9.1469e+06		3	3	8.88845	1.1942	1.17284e+08	1.04247e+07		3	3	9.94195	13.3799	1.11991e+08	1.11341e+07		3	3	3.43339	0.77124	9.5354e+07	3.27387e+06		3	3	21.3531	16.8381	1.06554e+08
9047	M797T496	796.62	496.248	2.77626e+08	PC(38:4e)+H	PC(38:4e)+H	PC	C46 H87 O7 N1 P1	796.621	C	796.62	-1.67	496.248	796.621	-0.04	490.11	3	3	11.6766	17.2452	5.92075e+07	6.91341e+06		3	3	23.2456	17.5319	7.28387e+07	1.69318e+07		3	3	16.6895	16.7019	6.82142e+07	1.13846e+07		3	3	22.6073	3.27105	2.6912e+08	6.08408e+07		3	3	14.2008	11.2824	2.95826e+08
9274	M809T458	808.583	457.951	7.7303e+08	PC(38:5)+H	PC(38:5)+H	PC	C46 H83 O8 N1 P1	808.585	C	808.583	-2.25	457.951	808.585	-0.21	458.73	3	3	8.52709	16.7995	4.44743e+08	3.79237e+07		3	3	6.67184	4.44628	5.2026e+08	3.47109e+07		3	3	2.53874	5.7083	5.04137e+08	1.27987e+07		3	3	13.3321	1.37807	6.75995e+08	9.01243e+07		3	3	7.93811	1.08992	7.23909e+08
9013	M795T475_2	794.604	474.809	3.67065e+08	PC(38:5e)+H	PC(38:5e)+H	PC	C46 H85 O7 N1 P1	794.606	C	794.604	-1.87	474.809	794.606	-0.04	474.27	3	3	15.5122	0.709177	1.59648e+08	2.4765e+07		3	3	10.7537	1.75601	1.87617e+08	2.01758e+07		3	3	8.43749	0.989784	1.74282e+08	1.4705e+07		3	3	19.9579	1.95598	3.11265e+08	6.21221e+07		3	3	11.4616	0.60779	3.41295e+08
9237	M807T448	806.568	448.016	1502281620	PC(38:6)+H	PC(38:6)+H	PC	C46 H81 O8 N1 P1	806.569	C	806.568	-1.39	448.016	806.569	-0.08	447.87	3	3	16.2163	16.5808	6.68304e+08	1.08374e+08		3	3	17.955	16.3449	8.19258e+08	1.47097e+08		3	3	8.8845	1.9693	6.81438e+08	6.05423e+07		3	3	26.3763	3.14084	1.27794e+09	3.37072e+08		3	3	15.7549	9.14079	1.36281e+09
9194	M805T429	804.552	428.596	3.77661e+07	PC(38:7)+H	PC(38:7)+H	PC	C46 H79 O8 N1 P1	804.554	C	804.552	-1.79	428.596	804.554	-0.24	429.54	3	3	16.9496	15.5982	1.81987e+07	3.0846e+06		0	1	NaN	NaN	NaN	NaN		2	2	28.0944	21.3931	1.73831e+07	4.88369e+06		3	3	21.4677	2.70512	2.94498e+07	6.32219e+06		3	2	16.1885	0.293191	3.30694e+07
9504	M823T470	822.599	469.544	1.6452e+07	PC(39:5)+H	PC(39:5)+H	PC	C47 H85 O8 N1 P1	822.601	C	822.599	-2.52	469.544	822.601	-0.08	469.71	3	3	9.97701	4.22124	7.48098e+06	746379		3	3	8.21302	2.85666	8.7968e+06	722483		3	3	6.59226	1.77144	7.98707e+06	526529		3	2	18.8417	1.08415	1.39918e+07	2.63629e+06		3	3	14.1602	1.53383	1.53766e+07
9460	M821T459	820.582	459.182	1.21356e+07	PC(39:6)+H	PC(39:6)+H	PC	C47 H83 O8 N1 P1	820.585	C	820.582	-3.38	459.182	820.585	-0.29	460.05	3	3	6.59039	2.4576	6.57716e+06	433460		3	3	10.0628	2.53339	7.69294e+06	774127		3	3	6.21696	1.46136	7.06983e+06	439529		3	3	15.1322	3.8618	1.04025e+07	1.57413e+06		3	3	8.52541	1.59948	1.10595e+07
9871	M843T526	842.662	525.9	4.40479e+06	PC(40:2)+H	PC(40:2)+H	PC	C48 H93 O8 N1 P1	842.663	C	842.662	-1.48	525.9	842.663	-0.21	525.9	2	3	50.2998	34.3403	344084	173073		3	3	17.6281	0.747037	377763	66592.3		3	3	17.9584	1.4506	300224	53915.4		3	3	18.2372	3.87399	3.96231e+06	722614		3	3	16.8191	3.13548	4.53826e+06
9805	M839T497	838.631	496.908	1.82819e+08	PC(40:4)+H	PC(40:4)+H	PC	C48 H89 O8 N1 P1	838.632	C	838.631	-1.71	496.908	838.632	-0.21	496.62	3	3	25.5984	31.0208	2.97161e+07	7.60685e+06		3	3	15.8305	0.786992	3.8094e+07	6.03048e+06		3	3	15.9674	1.15066	3.23482e+07	5.16515e+06		3	3	26.2617	14.7765	1.757e+08	4.61416e+07		3	3	34.0447	16.0514	1.82229e+08
9932	M847T517	846.633	516.82	8.95523e+06	PC(40:4e)+Na	PC(40:4e)+Na	PC	C48 H90 O7 N1 P1 Na1	846.635	C	846.633	-1.48	516.82	846.635	-0.15	511.14	0	0	NaN	NaN	NaN	NaN		0	0	NaN	NaN	NaN	NaN		0	0	NaN	NaN	NaN	NaN		3	3	14.6512	15.0536	6.86076e+06	1.00518e+06		2	3	44.9738	15.5089	8.65503e+06
9506	M823T496	822.635	496.344	6.914e+07	PC(40:5e)+H	PC(40:5e)+H	PC	C48 H89 O7 N1 P1	822.637	C	822.635	-2.24	496.344	822.637	0.03	490.98	3	3	19.9897	1.20057	1.69581e+07	3.38987e+06		3	3	16.7107	1.31446	2.30195e+07	3.84671e+06		3	3	11.2357	0.714432	1.9044e+07	2.13973e+06		3	3	22.739	0.638655	5.95308e+07	1.35367e+07		3	3	14.5924	9.83114	7.08455e+07
9724	M835T473	834.599	472.898	476666185	PC(40:6)+H	PC(40:6)+H	PC	C48 H85 O8 N1 P1	834.601	C	834.599	-1.77	472.898	834.601	-0.16	472.95	3	3	19.738	0.78984	1.59115e+08	3.14061e+07		3	3	13.2357	3.22207	1.92023e+08	2.54156e+07		3	3	11.7586	3.59216	1.73415e+08	2.03911e+07		3	3	19.0044	2.78698	4.14168e+08	7.87104e+07		3	3	10.8348	3.30637	4.62357e+08
9725	M835T459	834.598	459.373	4.33457e+07	PC(40:6)+H	PC(40:6)+H	PC	C48 H85 O8 N1 P1	834.601	C	834.598	-2.79	459.373	834.601	-0.27	458.85	3	3	6.60961	0.890505	2.44178e+07	1.61392e+06		3	3	8.12132	0.868143	2.95281e+07	2.39807e+06		3	3	7.76436	3.23813	2.72254e+07	2.11388e+06		3	3	13.8292	1.22054	3.71078e+07	5.1317e+06		1	1	NaN	NaN	4.42773e+07
9462	M821T476	820.619	476.387	4.00273e+07	PC(40:6e)+H	PC(40:6e)+H	PC	C48 H87 O7 N1 P1	820.621	C	820.619	-2.78	476.387	820.621	-0.14	476.94	3	3	13.55	12.613	1.47988e+07	2.00524e+06		3	3	15.8379	2.68508	1.83225e+07	2.9019e+06		3	3	7.85023	1.33495	1.64234e+07	1.28927e+06		3	3	28.5161	4.15989	3.38144e+07	9.64253e+06		3	3	21.8588	6.08473	3.39581e+07
10036	M855T451	854.565	450.938	1.27247e+07	PC(18:1_22:6)+Na	PC(40:7)+Na	PC	C48 H82 O8 N1 P1 Na1	854.567	B	854.565	-2	450.938	854.567	-0.21	450.69	3	3	11.1692	7.20565	6.76639e+06	755750		3	3	14.4335	6.71792	8.22753e+06	1.18752e+06		3	3	7.35538	7.06552	8.49453e+06	624805		3	3	18.9641	5.02859	1.02353e+07	1.94104e+06		3	3	6.81106	2.89227	1.06974e+07
9644	M831T429	830.568	428.799	7.52889e+07	PC(40:8)+H	PC(40:8)+H	PC	C48 H81 O8 N1 P1	830.569	C	830.568	-1.68	428.799	830.569	-0.19	429.51	3	3	16.5125	5.89264	4.11725e+07	6.79861e+06		3	3	7.03206	4.60607	5.16983e+07	3.63546e+06		3	3	7.61907	5.431	4.48759e+07	3.41912e+06		3	3	22.6242	2.49825	5.37877e+07	1.2169e+07		3	3	20.2485	4.39904	6.41861e+07
10306	M871T544	870.693	543.624	2.77215e+06	PC(42:2)+H	PC(42:2)+H	PC	C50 H97 O8 N1 P1	870.695	C	870.693	-1.32	543.624	870.695	0	543.03	3	3	70.8647	34.1605	104139	73797.5		3	3	43.677	27.9191	112992	49351.6		3	3	44.2138	11.6329	69008.3	30511.2		3	3	26.1382	3.84565	2.63162e+06	687858		3	3	17.2386	3.60959	3.16635e+06
10075	M857T556	856.714	556.062	4.55208e+06	PC(42:2e)+H	PC(42:2e)+H	PC	C50 H99 O7 N1 P1	856.715	C	856.714	-1.1	556.062	856.715	-0.13	556.11	2	0	52.3005	NaN	177777	92977.9		2	3	31.3913	6.25214	160434	50362.3		3	3	70.0894	33.1117	101844	71382		3	3	23.1011	7.31801	4.68444e+06	1.08216e+06		3	3	16.5015	8.95048	5.56101e+06
10242	M867T513	866.663	513.043	3.94898e+06	PC(42:4)+H	PC(42:4)+H	PC	C50 H93 O8 N1 P1	866.663	C	866.663	-0.77	513.043	866.663	-0.09	512.7	2	2	26.1969	15.7952	473089	123935		3	3	15.4604	16.3244	643537	99493.6		3	2	27.2656	13.9631	472954	128954		3	3	22.3554	2.52917	3.45385e+06	772122		3	3	20.1692	1.81462	3.94022e+06
10013	M853T535	852.683	535.229	2.52168e+07	PC(42:4e)+H	PC(42:4e)+H	PC	C50 H95 O7 N1 P1	852.684	C	852.683	-1.14	535.229	852.684	-0.12	534.87	3	3	29.7512	10.6016	1.77965e+06	529466		3	3	27.8933	0.735643	2.26593e+06	632044		3	3	21.9421	0.287394	1.65335e+06	362778		3	3	50.3552	11.3501	2.46824e+07	1.24289e+07		3	3	26.2462	14.4057	2.6672e+07
10204	M865T498	864.646	498.495	8.43029e+06	PC(42:5)+H	PC(42:5)+H	PC	C50 H91 O8 N1 P1	864.648	C	864.646	-1.39	498.495	864.648	-0.15	497.64	3	3	26.426	1.58923	1.54075e+06	407159		3	3	17.4028	1.82714	2.04966e+06	356699		3	3	15.8996	1.31749	1.7087e+06	271676		3	3	25.6116	0.863049	7.60257e+06	1.94714e+06		3	3	15.3282	0.785413	8.22749e+06
9960	M849T499	848.651	498.751	2.5106e+07	PC(42:6e)+H	PC(42:6e)+H	PC	C50 H91 O7 N1 P1	848.653	C	848.651	-1.95	498.751	848.653	-0.11	498.18	3	3	21.0368	1.09628	5.30164e+06	1.11529e+06		3	3	14.854	0.562017	7.059e+06	1.04854e+06		3	3	15.9166	1.53408	6.2935e+06	1.00171e+06		3	3	22.0754	3.39367	2.10822e+07	4.65399e+06		3	3	16.553	2.31845	2.43151e+07
10103	M859T451	858.599	451.14	6.25054e+06	PC(42:8)+H	PC(42:8)+H	PC	C50 H85 O8 N1 P1	858.601	C	858.599	-1.79	451.14	858.601	-0.21	450.63	3	3	15.0494	5.62992	3.07354e+06	462550		3	3	11.6358	1.22561	3.82517e+06	445091		3	3	2.02163	1.51402	3.4859e+06	70472		2	3	7.83018	2.96089	5.15608e+06	403730		2	2	16.2588	3.42239	5.37787e+06
10660	M895T539	894.693	539.259	1.79644e+06	PC(44:4)+H	PC(44:4)+H	PC	C52 H97 O8 N1 P1	894.695	C	894.693	-2.22	539.259	894.695	-0.14	538.92	2	1	53.6154	NaN	80496.7	43158.6		3	3	38.6548	12.6533	79942.1	30901.4		2	2	37.0679	0.654728	53878	19971.5		3	3	26.6776	3.96153	1.52619e+06	407151		3	3	38.6996	5.97002	1.59479e+06
10416	M879T535	878.699	534.694	4.71853e+07	PC(44:5e)+H	PC(44:5e)+H	PC	C52 H97 O7 N1 P1	878.7	C	878.699	-1.14	534.694	878.7	-0.09	534.3	3	3	47.9733	15.6108	5.02397e+06	2.41016e+06		3	3	18.9371	19.2405	4.8115e+06	911159		3	3	21.3412	1.68347	3.938e+06	840418		3	3	22.8672	1.23817	4.08534e+07	9.34205e+06		3	3	18.6065	2.1299	4.64592e+07
10389	M877T518	876.683	518.19	3.80112e+07	PC(44:6e)+H	PC(44:6e)+H	PC	C52 H95 O7 N1 P1	876.684	C	876.683	-1.34	518.19	876.684	-0.19	517.62	3	3	31.6099	0.62111	4.87884e+06	1.5422e+06		3	3	17.5635	0.406966	6.22129e+06	1.09268e+06		3	3	17.7158	1.76764	5.10956e+06	905199		3	3	24.5405	0.85801	3.2733e+07	8.03285e+06		3	3	19.7193	0.23637	3.70979e+07
7993	M719T484	718.537	484.39	7.91656e+06	PE(34:1)+H	PE(34:1)+H	PE	C39 H77 O8 N1 P1	718.538	C	718.537	-1.53	484.39	718.538	-0.35	484.29	3	3	35.8565	2.64078	1.30883e+06	469299		3	3	18.6822	9.18448	1.33271e+06	248980		3	3	24.4953	0.592993	1.13906e+06	279017		3	3	17.016	3.56432	7.45976e+06	1.26936e+06		3	3	12.8257	2.87931	7.86502e+06
7775	M703T496	702.542	496.368	8.34918e+06	PE(16:0p_18:1)+H	PE(34:1p)+H	PE	C39 H77 O7 N1 P1	702.543	A	702.542	-1.47	496.368	702.543	-0.15	496.26	3	3	29.946	8.47476	610978	182964		3	3	14.4796	1.07076	676119	97899.1		3	3	20.565	2.11867	565416	116278		3	3	28.4149	1.24812	7.50837e+06	2.1335e+06		3	3	19.8614	1.36482	8.42694e+06
7738	M701T478	700.527	477.735	1.90238e+07	PE(16:0p_18:2)+H	PE(34:2p)+H	PE	C39 H75 O7 N1 P1	700.528	A	700.527	-1.44	477.735	700.527	-0.14	477.66	3	3	33.7032	1.54247	2.93457e+06	989044		3	3	17.4093	4.17839	3.18425e+06	554356		3	3	14.575	1.83462	2.85744e+06	416471		3	3	22.7544	3.42373	1.695e+07	3.85687e+06		3	3	15.9427	1.90197	1.91616e+07
8633	M769T484	768.553	483.685	6.32752e+07	PE(18:0_18:1)+Na	PE(36:1)+Na	PE	C41 H80 O8 N1 P1 Na1	768.551	B	768.553	1.77	483.685	768.551	-0.17	483.57	3	3	32.5842	5.52001	1.24773e+07	4.06563e+06		3	3	16.4779	0.756285	1.46615e+07	2.41591e+06		3	3	18.3556	2.79803	1.2504e+07	2.29519e+06		3	3	16.551	4.28849	5.68162e+07	9.40365e+06		3	3	13.1956	2.81782	6.22282e+07
8162	M731T515	730.573	515.487	8.69686e+06	PE(18:0p_18:1)+H	PE(36:1p)+H	PE	C41 H81 O7 N1 P1	730.575	A	730.573	-1.4	515.487	730.574	-0.12	515.43	3	3	41.508	3.14136	314886	130703		3	3	18.0263	13.3156	364553	65715.4		3	2	35.2452	0.584867	300290	105838		3	3	32.3106	1.81054	8.76341e+06	2.83151e+06		3	3	23.6279	7.14964	9.68765e+06
8337	M745T488	744.553	488.006	4.63734e+07	PE(18:0_18:2)+H	PE(36:2)+H	PE	C41 H79 O8 N1 P1	744.554	B	744.553	-1.19	488.006	744.554	-0.21	488.07	3	1	39.0829	NaN	6.02354e+06	2.35417e+06		3	3	17.6684	0.2568	6.7926e+06	1.20014e+06		2	3	28.51	2.60018	5.82212e+06	1.65989e+06		3	3	22.2947	2.54341	4.09936e+07	9.13939e+06		3	3	16.2198	1.2402	4.49664e+07
8604	M767T463	766.537	462.722	1.4006e+07	PE(18:1_18:1)+Na	PE(36:2)+Na	PE	C41 H78 O8 N1 P1 Na1	766.536	A	766.537	1.04	462.722	766.535	-0.31	462.96	2	3	5.45725	6.71218	3.62945e+06	198068		3	3	8.15215	8.89378	5.12398e+06	417714		2	0	0.632942	NaN	4.86932e+06	30820		3	3	19.1977	1.63807	1.2317e+07	2.36459e+06		3	3	12.0932	4.70988	1.37928e+07
8138	M729T499	728.558	499.213	3.97992e+07	PE(18:0p_18:2)+H	PE(36:2p)+H	PE	C41 H79 O7 N1 P1	728.559	A	728.558	-1.09	499.213	728.559	-0.11	499.26	3	3	36.5975	2.97445	2.6831e+06	981947		3	3	16.4634	0.605604	3.30627e+06	544323		3	3	22.4927	2.04214	2.69027e+06	605115		3	3	28.8571	1.28829	3.46192e+07	9.99009e+06		3	3	20.9338	0.354162	3.98953e+07
8316	M743T468	742.537	468.127	1.51283e+07	PE(36:3)+H	PE(36:3)+H	PE	C41 H77 O8 N1 P1	742.538	C	742.537	-1.83	468.127	742.538	-0.15	467.49	3	3	23.2933	3.17079	3.52202e+06	820397		3	3	16.0417	4.36595	4.33555e+06	695496		3	3	14.496	4.48232	3.91149e+06	567010		3	3	18.0276	1.63197	1.38396e+07	2.49495e+06		3	3	15.4953	2.83035	1.50684e+07
8280	M741T460	740.522	460.123	1.91344e+07	PE(16:0_20:4)+H	PE(36:4)+H	PE	C41 H75 O8 N1 P1	740.522	B	740.522	-0.72	460.123	740.522	-0.12	460.14	3	3	25.2627	3.26149	6.10336e+06	1.54187e+06		3	3	10.0589	7.05449	6.73113e+06	677077		3	3	9.11699	6.84001	6.90301e+06	629347		3	3	22.816	8.26362	1.96888e+07	4.49219e+06		3	3	8.2513	8.56273	2.00256e+07
8080	M725T473	724.527	472.537	7.04552e+07	PE(16:0p_20:4)+H	PE(36:4p)+H	PE	C41 H75 O7 N1 P1	724.528	A	724.527	-1.42	472.537	724.527	-0.14	472.53	3	3	27.7536	1.79469	1.47031e+07	4.08065e+06		3	3	16.8617	4.73186	1.72925e+07	2.9158e+06		3	3	16.5452	4.409	1.54751e+07	2.56038e+06		3	3	21.3494	3.88887	6.14735e+07	1.31242e+07		3	3	16.2364	2.51232	6.73767e+07
8410	M751T475	750.542	474.625	8.12717e+07	PE(16:0p_22:5)+H	PE(38:5p)+H	PE	C43 H77 O7 N1 P1	750.543	A	750.542	-1.36	474.625	750.543	-0.06	474.78	3	3	25.436	1.12487	1.75525e+07	4.46465e+06		3	3	15.4962	3.36737	2.11478e+07	3.2771e+06		3	3	13.3681	6.79869	1.86164e+07	2.48867e+06		3	3	22.073	3.56561	7.13283e+07	1.57443e+07		3	3	21.6369	1.57613	8.15156e+07
8386	M749T464	748.526	463.825	2.09442e+07	PE(16:0p_22:6)+H	PE(38:6p)+H	PE	C43 H75 O7 N1 P1	748.528	A	748.526	-1.7	463.825	748.527	-0.15	463.83	3	3	22.2965	11.6351	7.13834e+06	1.5916e+06		3	3	10.5444	4.87383	8.06645e+06	850560		3	3	26.4646	8.60436	6.86404e+06	1.81654e+06		3	3	24.0494	4.71765	1.82821e+07	4.39673e+06		3	3	13.3805	4.17551	1.94311e+07
8798	M779T494	778.574	493.881	1.95658e+07	PE(18:0p_22:5)+H	PE(40:5p)+H	PE	C45 H81 O7 N1 P1	778.575	A	778.574	-1.23	493.881	778.574	-0.16	493.89	1	1	NaN	NaN	3.18318e+06	NaN		2	3	49.2834	19.671	2.5636e+06	1.26343e+06		1	2	NaN	18.4848	2.67045e+06	NaN		3	3	24.0846	0.907721	1.65368e+07	3.98282e+06		3	3	16.7709	2.04457	1.85873e+07
8755	M777T487	776.558	486.842	1.79875e+07	PE(18:0p_22:6)+H	PE(40:6p)+H	PE	C45 H79 O7 N1 P1	776.559	A	776.558	-0.62	486.842	776.559	0.11	486.69	3	3	33.473	2.10319	3.36062e+06	1.1249e+06		3	3	12.5687	6.01939	4.08225e+06	513087		3	3	20.3011	3.77308	3.24877e+06	659536		3	3	16.4453	16.1831	1.59649e+07	2.62547e+06		3	3	12.5816	3.9145	1.66082e+07
8725	M775T466	774.543	466.087	1.15164e+07	PE(18:1p_22:6)+H	PE(40:7p)+H	PE	C45 H77 O7 N1 P1	774.543	A	774.543	-0.64	466.087	774.543	-0.07	466.14	3	3	12.895	5.13212	2.95158e+06	380607		3	3	10.306	6.96042	3.64449e+06	375602		3	3	12.455	0.305668	3.42526e+06	426615		3	3	26.9138	8.13359	9.48586e+06	2.553e+06		3	3	20.9693	4.04943	1.0623e+07
10008	M853T439	852.558	438.584	6.28084e+06	PI(16:0_18:2)+NH4	PI(34:2)+NH4	PI	C43 H83 O13 N1 P1	852.56	B	852.558	-2.32	438.584	852.559	-0.25	438.18	3	3	28.7325	5.36046	978632	281186		3	3	9.21674	6.4178	1.10261e+06	101625		3	3	16.4513	6.97447	1.03987e+06	171072		3	3	24.7075	4.56029	6.02865e+06	1.48953e+06		3	3	20.7368	1.80382	6.79667e+06
10409	M879T442	878.573	442.181	3.75053e+06	PI(36:3)+NH4	PI(36:3)+NH4	PI	C45 H85 O13 N1 P1	878.575	C	878.573	-2.75	442.181	878.575	-0.35	441.21	2	1	15.0148	NaN	768980	115461		3	3	13.312	5.93347	750696	99932.8		3	3	18.1261	12.5067	717615	130076		3	3	25.679	0.821464	3.5747e+06	917947		3	3	22.7207	1.70474	4.00629e+06
10384	M877T434	876.559	433.59	5.99869e+06	PI(16:0_20:4)+NH4	PI(36:4)+NH4	PI	C45 H83 O13 N1 P1	876.56	B	876.559	-1.3	433.59	876.56	-0.16	433.658	0	0	NaN	NaN	NaN	NaN		1	0	NaN	NaN	1.43528e+06	NaN		0	0	NaN	NaN	NaN	NaN		3	3	26.3286	2.49075	5.18672e+06	1.36559e+06		3	3	22.7937	0.837709	5.8164e+06
10802	M905T459	904.589	459.047	6.54701e+07	PI(18:0_20:4)+NH4	PI(38:4)+NH4	PI	C47 H87 O13 N1 P1	904.591	B	904.589	-2.14	459.047	904.591	-0.07	459	3	3	24.445	1.09782	1.02519e+07	2.50608e+06		3	3	12.6032	2.3975	1.21467e+07	1.53088e+06		3	3	17.8658	3.69074	1.05835e+07	1.89083e+06		3	3	19.0347	2.28075	6.68619e+07	1.2727e+07		3	3	18.1763	3.07688	7.36023e+07
10772	M903T438	902.573	437.707	4.22934e+06	PI(18:1_20:4)+NH4	PI(38:5)+NH4	PI	C47 H85 O13 N1 P1	902.575	B	902.573	-2.4	437.707	902.575	-0.17	436.8	0	0	NaN	NaN	NaN	NaN		0	0	NaN	NaN	NaN	NaN		0	0	NaN	NaN	NaN	NaN		3	3	28.7957	1.23375	3.69085e+06	1.06281e+06		3	3	24.5244	1.28252	4.24861e+06
10741	M901T425	900.559	424.946	1.51682e+06	PI(38:6)+NH4	PI(38:6)+NH4	PI	C47 H83 O13 N1 P1	900.56	C	900.559	-1.06	424.946	900.559	-0.19	425.01	2	1	12.2358	NaN	180064	22032.3		2	2	30.7086	6.4387	298040	91523.6		3	1	19.8731	NaN	254193	50516		3	3	23.8102	3.64289	1.44324e+06	343639		3	3	18.5799	2.82863	1.61217e+06
7047	M648T383	647.512	383.432	5.30131e+06	SM(d30:1)+H	SM(d30:1)+H	SM	C35 H72 O6 N2 P1	647.512	C	647.512	-0.5	383.432	647.512	-0.06	383.16	3	3	27.0766	1.62881	2.01819e+06	546456		3	3	11.5387	0.778377	1.9865e+06	229216		3	3	12.1022	2.39845	1.90847e+06	230966		3	3	24.6126	0.262621	4.34022e+06	1.06824e+06		3	3	16.7108	2.06248	5.02339e+06
7217	M662T405	661.528	405.064	2.26578e+06	SM(d31:1)+H	SM(d31:1)+H	SM	C36 H74 O6 N2 P1	661.528	C	661.528	-0.52	405.064	661.528	-0.06	404.97	3	3	37.1713	3.48305	617352	229477		3	3	12.3295	1.52656	579817	71488.3		3	3	11.9496	0.974658	558659	66757.6		3	3	23.0422	1.98986	2.005e+06	461995		3	3	18.5478	0.618761	2.34566e+06
7437	M678T437	677.558	436.6	5.79861e+06	SM(d32:0)+H	SM(d32:0)+H	SM	C37 H78 O6 N2 P1	677.559	C	677.558	-1.22	436.6	677.559	-0.12	436.11	3	3	41.5819	8.67902	670272	278712		2	2	3.67342	61.3806	574828	21115.9		3	3	22.8665	4.01678	563626	128882		3	3	23.3028	2.59984	5.3199e+06	1.23968e+06		3	3	19.5281	1.54734	6.10353e+06
7411	M676T424	675.543	423.957	2.48281e+08	SM(d32:1)+H	SM(d32:1)+H	SM	C37 H76 O6 N2 P1	675.544	C	675.543	-0.93	423.957	675.544	0.02	423.66	3	3	40.0093	0.608467	3.42922e+07	1.37201e+07		3	3	10.1946	1.12295	3.30742e+07	3.37178e+06		3	3	15.8217	0.685027	3.12506e+07	4.94437e+06		3	3	21.1428	2.38212	2.39695e+08	5.06782e+07		3	3	14.8901	0.369362	2.72922e+08
7379	M674T389	673.528	389.153	1.14276e+07	SM(d32:2)+H	SM(d32:2)+H	SM	C37 H74 O6 N2 P1	673.528	C	673.528	-0.59	389.153	673.528	-0.07	388.8	3	3	19.7779	1.84127	5.18609e+06	1.0257e+06		3	3	10.5413	0.238477	5.47759e+06	577407		3	3	8.54506	0.712211	5.29977e+06	452868		3	3	23.1432	1.9822	8.95037e+06	2.0714e+06		3	3	18.9859	0.651073	1.02624e+07
7606	M690T440	689.558	440.304	8.6377e+07	SM(d33:1)+H	SM(d33:1)+H	SM	C38 H78 O6 N2 P1	689.559	C	689.558	-1.27	440.304	689.559	-0.06	440.25	3	3	38.3923	1.33226	1.12499e+07	4.31911e+06		3	3	7.98953	1.26035	9.7753e+06	781001		3	3	17.0064	0.451903	9.97742e+06	1.6968e+06		3	3	23.54	1.028	8.20923e+07	1.93245e+07		3	3	16.7639	1.50118	9.15151e+07
7577	M688T410	687.543	409.806	1.91468e+06	SM(d33:2)+H	SM(d33:2)+H	SM	C38 H76 O6 N2 P1	687.544	C	687.543	-0.66	409.806	687.544	-0.04	409.5	3	3	26.302	4.86606	627048	164926		3	3	11.7367	2.4564	641800	75325.9		3	3	10.5519	2.51643	609315	64294.3		3	3	21.4629	1.29802	1.65112e+06	354377		3	3	14.7129	4.13243	1.93223e+06
7793	M704T455	703.574	454.654	1420876927	SM(d34:1)+H	SM(d34:1)+H	SM	C39 H80 O6 N2 P1	703.575	C	703.574	-1.42	454.654	703.575	-0.09	454.5	3	3	35.6357	1.56998	1.74137e+08	6.2055e+07		3	3	6.71788	1.14473	1.43083e+08	9.61211e+06		3	3	13.3906	1.03871	1.53763e+08	2.05898e+07		3	3	14.7977	1.38165	1.40995e+09	2.0864e+08		3	3	7.21183	0.521741	1.51479e+09
7761	M702T427	701.558	427.278	8.08866e+08	SM(d18:1_16:1)+H	SM(d34:2)+H	SM	C39 H78 O6 N2 P1	701.559	B	701.558	-1.22	427.278	701.559	-0.06	427.38	3	3	37.4328	2.64667	1.76991e+08	6.62526e+07		3	3	12.0711	0.695086	1.94395e+08	2.34656e+07		3	3	15.7519	2.75306	1.73465e+08	2.73241e+07		3	3	18.0282	3.57432	7.53229e+08	1.35793e+08		3	3	11.1808	0.700834	8.35572e+08
7951	M716T443	715.574	443.267	7.82977e+06	SM(d35:2)+H	SM(d35:2)+H	SM	C40 H80 O6 N2 P1	715.575	C	715.574	-1.07	443.267	715.575	-0.15	442.8	3	3	32.6289	1.53812	1.69539e+06	553189		3	3	15.3018	1.01306	1.75677e+06	268817		3	3	11.6721	2.14019	1.64541e+06	192054		3	3	22.6578	3.05909	7.26879e+06	1.64695e+06		3	3	16.9972	0.970178	8.18971e+06
8200	M734T490	733.621	489.832	1.87719e+07	SM(d36:0)+H	SM(d36:0)+H	SM	C41 H86 O6 N2 P1	733.622	C	733.621	-1.11	489.832	733.622	-0.13	489.54	3	3	16.887	4.98221	304806	51472.7		2	3	23.7359	16.5078	281191	66743.1		3	3	18.4029	7.7468	416955	76731.6		3	3	18.9959	1.53972	2.32395e+07	4.41456e+06		3	3	13.0694	2.51255	2.58917e+07
8173	M732T481	731.605	480.776	2.18455e+08	SM(d36:1)+H	SM(d36:1)+H	SM	C41 H84 O6 N2 P1	731.606	C	731.605	-1.4	480.776	731.606	-0.07	480.36	3	3	22.3672	0.86079	1.64881e+07	3.68792e+06		3	3	6.24144	0.541523	1.41383e+07	882431		3	3	10.4773	2.44789	1.61639e+07	1.69355e+06		3	3	11.6909	2.56744	2.48035e+08	2.89976e+07		3	3	7.54229	0.882815	2.69285e+08
8152	M730T457	729.589	457.299	1.33193e+08	SM(d36:2)+H	SM(d36:2)+H	SM	C41 H82 O6 N2 P1	729.591	C	729.589	-1.86	457.299	729.59	-0.18	457.32	3	3	25.7738	0.730807	3.121e+07	8.04399e+06		3	3	7.10386	1.51086	3.03671e+07	2.15724e+06		3	3	11.2818	2.92606	2.96208e+07	3.34177e+06		3	3	14.9211	2.67113	1.2765e+08	1.90467e+07		3	3	9.55361	0.651285	1.38093e+08
8127	M728T434	727.574	433.935	2.65973e+07	SM(d36:3)+H	SM(d36:3)+H	SM	C41 H80 O6 N2 P1	727.575	C	727.574	-1.32	433.935	727.575	-0.28	430.17	3	3	24.7425	1.67417	8.63457e+06	2.13641e+06		3	3	12.5701	1.18487	9.62393e+06	1.20974e+06		3	3	12.1849	0.611685	8.99877e+06	1.09649e+06		3	3	24.1822	2.52053	2.18544e+07	5.28487e+06		3	3	19.5244	0.690153	2.45426e+07
8356	M746T492	745.621	492.344	2.16144e+07	SM(d37:1)+H	SM(d37:1)+H	SM	C42 H86 O6 N2 P1	745.622	C	745.621	-0.6	492.344	745.622	0.23	492.24	3	3	29.0005	8.73611	757570	219699		3	3	18.3239	11.9465	577481	105817		3	3	21.9686	4.97376	791432	173866		3	3	21.8982	3.21648	2.40221e+07	5.2604e+06		3	3	14.1153	2.85283	2.64688e+07
8544	M762T513	761.652	512.667	1.19992e+07	SM(d38:0)+H	SM(d38:0)+H	SM	C43 H90 O6 N2 P1	761.653	C	761.652	-1.38	512.667	761.653	-0.29	511.32	0	2	NaN	12.8027	NaN	NaN		3	3	10.9601	1.56425	73400.6	8044.81		3	2	9.36192	55.2214	97938.9	9168.96		3	3	21.8782	3.24567	1.20003e+07	2.62545e+06		3	3	17.0046	0.681816	1.39284e+07
8518	M760T504	759.637	503.505	2.50359e+08	SM(d38:1)+H	SM(d38:1)+H	SM	C43 H88 O6 N2 P1	759.637	C	759.637	-0.96	503.505	759.637	-0.16	503.04	3	3	17.8282	0.87123	8.68515e+06	1.54841e+06		3	3	9.67368	0.727704	8.47327e+06	819677		3	3	14.5734	1.45422	9.27994e+06	1.35241e+06		3	3	17.5837	3.2851	2.86633e+08	5.04009e+07		3	3	10.4574	1.11641	3.20198e+08
8491	M758T482	757.621	482.489	6.93701e+07	SM(d38:2)+H	SM(d38:2)+H	SM	C43 H86 O6 N2 P1	757.622	C	757.621	-0.89	482.489	757.622	-0.05	482.4	3	3	23.4349	2.47494	1.13554e+07	2.66112e+06		3	3	4.73087	2.34003	1.14238e+07	540444		3	3	16.3286	1.45956	1.08199e+07	1.76673e+06		3	3	13.8728	3.70409	6.62171e+07	9.18617e+06		3	3	9.37275	2.92523	7.23894e+07
8469	M756T460	755.606	459.935	3.75455e+06	SM(d38:3)+H	SM(d38:3)+H	SM	C43 H84 O6 N2 P1	755.606	C	755.606	-0.65	459.935	755.606	-0.16	460.68	3	3	26.0201	7.64932	768903	200069		3	3	12.0241	9.56852	887589	106724		3	2	20.1	9.04465	754291	151612		3	3	18.271	0.563026	3.22077e+06	588468		3	3	7.51665	4.47846	3.91743e+06
8717	M774T514	773.653	514.225	9.66804e+07	SM(d39:1)+H	SM(d39:1)+H	SM	C44 H90 O6 N2 P1	773.653	C	773.653	-0.52	514.225	773.653	-0.03	513.96	3	3	14.4592	2.75422	1.99884e+06	289017		3	3	6.5073	3.1978	2.04236e+06	132902		3	3	19.266	2.23088	2.19325e+06	422552		3	3	24.1125	2.42619	1.16269e+08	2.80354e+07		3	3	19.4566	1.68228	1.33755e+08
8688	M772T494	771.637	494.115	1.29003e+07	SM(d39:2)+H	SM(d39:2)+H	SM	C44 H88 O6 N2 P1	771.637	C	771.637	-0.57	494.115	771.637	-0.32	493.71	3	3	28.5161	5.87305	894583	255100		3	3	11.159	2.39275	841470	93899.3		3	3	20.6215	4.16606	850228	175330		3	3	23.542	2.65276	1.25058e+07	2.94411e+06		3	3	16.7951	4.86025	1.37319e+07
8925	M788T523	787.668	523.01	5.43723e+08	SM(d40:1)+H	SM(d40:1)+H	SM	C45 H92 O6 N2 P1	787.669	C	787.668	-0.85	523.01	787.669	-0.12	522.51	3	3	7.90475	0.621733	6.89831e+06	545294		3	3	8.52873	1.96904	8.08266e+06	689349		3	3	19.3334	2.7218	8.89262e+06	1.71925e+06		3	3	15.8033	4.60025	6.6858e+08	1.05658e+08		3	3	12.6993	1.49911	7.64257e+08
8904	M786T505	785.652	504.623	4.2222e+08	SM(d40:2)+H	SM(d40:2)+H	SM	C45 H90 O6 N2 P1	785.653	C	785.652	-0.86	504.623	785.653	-0.09	504.27	3	3	26.3828	1.40855	3.10904e+07	8.20251e+06		3	3	11.8487	2.73833	3.05925e+07	3.6248e+06		3	3	16.5687	0.871313	2.92584e+07	4.84774e+06		3	3	20.1261	4.03309	4.05323e+08	8.15758e+07		3	3	11.3671	0.975725	4.53493e+08
9151	M802T532	801.684	532.333	272843888	SM(d41:1)+H	SM(d41:1)+H	SM	C46 H94 O6 N2 P1	801.684	C	801.684	-0.65	532.333	801.684	-0.07	531.75	3	3	7.89516	1.08775	2.09638e+06	165513		3	3	8.03679	3.04935	2.75367e+06	221306		3	3	22.3946	1.88655	2.95496e+06	661752		3	3	19.8995	2.52122	3.64148e+08	7.24636e+07		3	3	16.5556	2.41098	4.18911e+08
9110	M800T515	799.668	514.984	2.33015e+08	SM(d41:2)+H	SM(d41:2)+H	SM	C46 H92 O6 N2 P1	799.669	C	799.668	-0.98	514.984	799.669	-0.03	514.68	3	3	27.4668	1.77937	9.68033e+06	2.65888e+06		3	3	10.9797	0.756426	9.65267e+06	1.05983e+06		3	3	20.877	0.539938	9.2305e+06	1.92705e+06		3	3	25.9515	2.02256	2.23634e+08	5.80363e+07		3	3	20.1594	1.73792	2.58706e+08
9384	M816T541	815.699	540.692	589731982	SM(d42:1)+H	SM(d42:1)+H	SM	C47 H96 O6 N2 P1	815.7	C	815.699	-0.76	540.692	815.7	-0.08	540.27	3	3	17.9264	2.37496	2.3462e+06	420590		3	3	6.38411	1.45856	3.26682e+06	208557		3	3	28.5038	5.05283	3.34494e+06	953434		3	3	21.3715	18.2562	8.4236e+08	1.80025e+08		3	3	28.1387	19.534	8.95469e+08
9356	M814T523	813.683	523.239	1124745902	SM(d42:2)+H	SM(d42:2)+H	SM	C47 H94 O6 N2 P1	813.684	C	813.683	-1.26	523.239	813.684	-0.04	522.57	3	3	29.9189	11.2057	4.32664e+07	1.29448e+07		3	3	19.6166	1.02771	4.05168e+07	7.948e+06		3	3	19.1387	13.8198	3.9941e+07	7.64418e+06		3	3	17.9492	4.22312	1.09697e+09	1.96897e+08		3	3	13.8938	1.13302	1.2578e+09
9331	M812T505	811.667	505.015	5.09293e+08	SM(d42:3)+H	SM(d42:3)+H	SM	C47 H92 O6 N2 P1	811.669	C	811.667	-1.61	505.015	811.669	-0.13	504.36	3	3	27.1185	0.602901	4.52063e+07	1.22593e+07		3	3	12.3655	1.82858	4.68999e+07	5.79939e+06		3	3	16.5183	1.59476	4.32982e+07	7.15213e+06		3	3	20.77	4.22839	4.80255e+08	9.97488e+07		3	3	11.7629	1.30185	5.38445e+08
9636	M830T547	829.715	547.03	2.09182e+07	SM(d43:1)+H	SM(d43:1)+H	SM	C48 H98 O6 N2 P1	829.716	C	829.715	-0.28	547.03	829.716	-0.13	545.67	3	3	5.52287	8.67017	81733	4514.01		3	3	12.542	3.26647	124273	15586.4		3	3	34.715	8.04582	121515	42183.9		3	3	22.1114	2.87611	2.46123e+07	5.44213e+06		3	3	17.4364	2.06392	2.92921e+07
9606	M828T530	827.699	529.98	3.88346e+07	SM(d43:2)+H	SM(d43:2)+H	SM	C48 H96 O6 N2 P1	827.7	C	827.699	-0.92	529.98	827.7	-0.14	528.54	3	3	21.5215	2.31496	994706	214076		3	3	11.6873	2.61929	1.06509e+06	124480		3	3	25.1933	2.47371	1.0528e+06	265234		3	3	21.0307	2.66267	4.14623e+07	8.71981e+06		3	3	17.9135	1.69041	4.74523e+07
9567	M826T514	825.684	513.986	6.39954e+06	SM(d43:3)+H	SM(d43:3)+H	SM	C48 H94 O6 N2 P1	825.684	C	825.684	-0.57	513.986	825.684	-0.13	514.11	3	3	28.9645	10.7294	185773	53808.3		3	3	12.6544	15.004	168543	21328		3	3	26.501	10.3833	200678	53181.7		3	3	27.6706	2.34728	6.23106e+06	1.72417e+06		3	3	19.951	3.53519	7.1577e+06
9860	M842T540	841.715	540.415	7.82701e+06	SM(d44:2)+H	SM(d44:2)+H	SM	C49 H98 O6 N2 P1	841.716	C	841.715	-0.67	540.415	841.716	-0.14	539.46	1	1	NaN	NaN	73226.7	NaN		2	3	29.9747	17.0505	67259	20160.7		3	3	36.2317	6.14692	79903.7	28950.4		3	3	23.6187	15.2611	7.80019e+06	1.8423e+06		3	3	23.4929	14.3432	1.0609e+07
8011	M720T446	719.569	445.62	7.24472e+06	SM(t34:1)+H	SM(t34:1)+H	SM	C39 H80 O7 N2 P1	719.57	C	719.569	-1.2	445.62	719.57	0.07	445.41	3	3	34.0414	21.2108	328803	111929		2	2	0.682078	6.5306	247857	1690.57		3	3	17.8682	4.38394	369197	65968.7		3	3	20.8279	3.20426	7.06001e+06	1.47045e+06		3	3	16.3929	2.18961	8.11433e+06
8013	M720T430	719.569	429.582	1.84567e+06	SM(t34:1)+H	SM(t34:1)+H	SM	C39 H80 O7 N2 P1	719.57	C	719.569	-1.52	429.582	719.57	-0.12	429.6	0	1	NaN	NaN	NaN	NaN		1	0	NaN	NaN	123940	NaN		0	1	NaN	NaN	NaN	NaN		1	3	NaN	2.56533	1.78688e+06	NaN		1	0	NaN	NaN	1.38184e+06
7978	M718T416	717.554	416.23	1.82139e+06	SM(t34:2)+H	SM(t34:2)+H	SM	C39 H78 O7 N2 P1	717.554	C	717.554	-0.76	416.23	717.554	-0.02	415.95	3	3	30.1518	2.8435	448655	135277		3	3	10.8835	3.41659	417749	45465.8		3	3	15.6532	4.58956	394616	61769.9		3	3	24.6527	3.57345	1.65188e+06	407232		3	3	19.428	0.972164	1.90579e+06
9675	M832T513	831.694	512.869	7.53104e+06	SM(t42:1)+H	SM(t42:1)+H	SM	C47 H96 O7 N2 P1	831.695	C	831.694	-1.5	512.869	831.695	-0.1	512.58	3	3	5.65501	5.65942	105695	5977.05		3	3	6.02032	3.1544	112559	6776.42		3	3	15.648	3.37421	128950	20178.1		3	3	24.4946	2.33072	9.03734e+06	2.21367e+06		3	3	19.1186	1.07138	1.05357e+07
6161	M585T496	584.524	495.509	9.25671e+06	TG(32:1e)+NH4	TG(32:1e)+NH4	TG	C35 H70 O5 N1	584.525	C	584.524	-0.81	495.509	584.525	-0.09	495.42	3	3	33.2546	3.71704	1.59547e+06	530568		3	3	20.4335	1.88826	2.03794e+06	416422		3	3	18.2248	1.05758	1.59189e+06	290119		3	3	18.3249	1.79459	8.50839e+06	1.55915e+06		3	3	15.5607	1.62588	9.40875e+06
6541	M611T499	610.54	498.567	7.97928e+07	TG(34:2e)+NH4	TG(34:2e)+NH4	TG	C37 H72 O5 N1	610.541	C	610.54	-0.8	498.567	610.54	-0.1	498.39	3	3	35.2588	1.12091	1.13104e+07	3.98791e+06		3	3	20.1988	2.15109	1.4688e+07	2.96679e+06		3	3	18.1546	0.334931	1.15724e+07	2.10092e+06		3	3	23.4742	1.39513	7.09733e+07	1.66604e+07		3	3	16.7018	0.57306	7.88976e+07
6970	M641T533	640.587	532.574	7.87104e+06	TG(36:1e)+NH4	TG(36:1e)+NH4	TG	C39 H78 O5 N1	640.587	C	640.587	-0.65	532.574	640.587	-0.09	532.53	3	3	48.36	4.67065	571883	276563		3	3	31.5062	5.23651	666763	210072		3	3	34.2709	0.715013	479283	164255		3	3	20.7737	2.07096	9.14938e+06	1.90067e+06		3	3	17.6525	3.2061	1.05503e+07
7889	M711T554_1	710.629	553.901	1.1512e+06	TG(40:1)+NH4	TG(40:1)+NH4	TG	C43 H84 O6 N1	710.629	C	710.629	-1.12	553.901	710.629	0.07	553.59	3	3	48.9353	23.5757	66589.9	32586		3	3	32.1841	15.5276	72418.3	23307.2		2	0	50.3903	NaN	55222.7	27826.9		3	3	17.8813	2.90002	1.44567e+06	258504		3	3	13.5701	4.19863	1.79638e+06
8243	M737T558	736.645	557.842	1.58296e+06	TG(6:0_18:1_18:1)+NH4	TG(42:2)+NH4	TG	C45 H86 O6 N1	736.645	B	736.645	-0.44	557.842	736.645	-0.02	559.44	2	0	48.8731	NaN	77517.9	37885.4		1	2	NaN	2.94951	151943	NaN		1	0	NaN	NaN	97512.8	NaN		3	2	36.8473	49.0496	1.80411e+06	664768		3	3	11.0704	37.3764	2.54253e+06
8587	M765T568	764.676	567.957	3.51667e+06	TG(16:0_10:0_18:2)+NH4	TG(44:2)+NH4	TG	C47 H90 O6 N1	764.676	A	764.676	-0.92	567.957	764.676	-0.02	567.6	3	3	39.6156	9.84336	203012	80424.3		3	3	40.4734	7.82584	226807	91796.6		3	3	70.5198	8.45172	136854	96508.8		3	3	14.5076	1.08685	5.0001e+06	725395		3	3	8.72252	3.91121	5.88461e+06
9019	M795T590	794.722	590.3	5.08895e+07	TG(18:1_14:0_14:0)+NH4	TG(46:1)+NH4	TG	C49 H96 O6 N1	794.723	A	794.722	-1.25	590.3	794.723	-0.11	590.22	3	3	27.3142	3.52425	1.70293e+06	465142		3	3	18.0386	1.17577	1.92065e+06	346458		3	3	40.7162	1.61817	1.32806e+06	540735		3	3	17.0039	5.803	7.55857e+07	1.28525e+07		3	3	1.52107	3.65397	8.53347e+07
8992	M793T580	792.707	580.007	23701478	TG(16:1_12:0_18:1)+NH4	TG(46:2)+NH4	TG	C49 H94 O6 N1	792.708	A	792.707	-1.17	580.007	792.708	-0.06	579.87	3	3	37.0285	1.99197	1.0433e+06	386319		3	3	24.8892	0.675762	1.15991e+06	288692		3	3	52.7925	4.66814	748597	395203		3	3	11.9461	1.02529	4.20413e+07	5.0223e+06		3	3	7.56587	0.753144	4.73429e+07
8959	M791T569	790.691	569.445	5.63316e+06	TG(16:1_12:0_18:2)+NH4	TG(46:3)+NH4	TG	C49 H92 O6 N1	790.692	A	790.691	-0.86	569.445	790.692	-0.08	568.47	3	3	49.9226	13.3834	321145	160324		3	3	37.1016	8.58368	355996	132080		3	3	59.165	14.53	225985	133704		3	3	12.8803	1.61832	8.20871e+06	1.05731e+06		3	3	6.82078	4.52367	9.58107e+06
9244	M807T586	806.722	585.797	3.45479e+06	TG(15:0_14:0_18:2)+NH4	TG(47:2)+NH4	TG	C50 H96 O6 N1	806.723	A	806.722	-1.49	585.797	806.723	-0.16	585.39	3	3	19.3266	11.9241	201262	38897.2		3	3	3.96644	9.14818	194434	7712.13		3	3	32.7862	7.14968	144735	47453		3	3	13.4223	2.63602	6.12806e+06	822530		3	3	12.9649	1.33065	7.20405e+06
9607	M828T600	827.709	600.334	1.58247e+07	TG(16:0_16:0_16:1)+Na	TG(48:1)+Na	TG	C51 H96 O6 Na1	827.71	A	827.709	-1.4	600.334	827.71	-0.1	600.139	3	3	10.3129	1.34425	3.80525e+06	392432		3	3	6.13874	1.15799	4.22579e+06	259410		3	3	13.896	1.94209	3.66658e+06	509509		3	3	17.7365	10.6321	1.5216e+07	2.69878e+06		3	3	11.336	2.41982	1.63862e+07
9472	M821T591	820.738	590.973	1.67103e+08	TG(16:0_14:0_18:2)+NH4	TG(48:2)+NH4	TG	C51 H98 O6 N1	820.739	A	820.738	-1.17	590.973	820.739	-0.13	590.91	3	3	27.6335	2.17473	6.00773e+06	1.66015e+06		3	3	17.4672	0.504957	6.89478e+06	1.20432e+06		3	3	45.3701	1.20722	4.63797e+06	2.10425e+06		3	3	18.2781	5.20202	2.52522e+08	4.61562e+07		3	3	3.15279	2.74114	2.71137e+08
9439	M819T581	818.722	580.82	5.51065e+07	TG(16:0_14:0_18:3)+NH4	TG(48:3)+NH4	TG	C51 H96 O6 N1	818.723	A	818.722	-1.08	580.82	818.723	-0.19	580.5	3	3	39.303	4.64787	2.27407e+06	893777		3	3	28.5355	1.85212	2.61827e+06	747136		3	3	52.4931	0.896171	1.60214e+06	841010		3	3	11.8858	0.297788	9.50643e+07	1.12992e+07		3	3	6.52676	0.787817	1.06609e+08
9400	M817T570	816.707	570.492	1.38991e+07	TG(48:4)+NH4	TG(48:4)+NH4	TG	C51 H94 O6 N1	816.708	C	816.707	-1.14	570.492	816.707	-0.1	573.69	2	2	32.537	0.912937	863332	280902		3	3	33.4659	2.19595	769026	257361		2	2	61.2685	3.28756	574149	351772		3	3	11.5599	2.01342	2.08487e+07	2.41008e+06		3	3	7.53672	2.63947	2.40373e+07
9735	M835T596	834.754	596.268	1.99872e+07	TG(16:0_16:1_17:1)+NH4	TG(49:2)+NH4	TG	C52 H100 O6 N1	834.755	A	834.754	-1.2	596.268	834.754	-0.1	596.25	3	3	16.2291	1.57974	722475	117251		3	3	9.451	2.79198	783730	74070.3		3	3	36.3129	5.16016	604542	219526		3	3	18.7073	3.0929	3.10614e+07	5.81076e+06		3	3	6.99225	3.25399	3.73589e+07
9697	M833T587	832.738	586.663	7.62861e+06	TG(14:0_17:1_18:2)+NH4	TG(49:3)+NH4	TG	C52 H98 O6 N1	832.739	A	832.738	-1.26	586.663	832.739	-0.02	585.99	3	3	38.7524	3.61961	263248	102015		3	3	15.9136	2.36064	300385	47802.1		3	3	48.5345	5.7344	188638	91554.4		3	3	11.9173	1.00947	1.34683e+07	1.60506e+06		3	3	4.95952	1.15664	1.5148e+07
10062	M856T610	855.74	610.111	3.63018e+07	TG(16:0_16:0_18:1)+Na	TG(50:1)+Na	TG	C53 H100 O6 Na1	855.741	A	855.74	-1.42	610.111	855.741	-0.14	609.78	3	3	16.1949	1.46082	8.67828e+06	1.40544e+06		3	3	12.0197	3.63694	9.00391e+06	1.08224e+06		3	3	8.60233	16.555	8.34238e+06	717639		3	3	33.6713	0.920234	4.25325e+07	1.43212e+07		3	3	9.17997	5.34249	4.43669e+07
9967	M849T601	848.769	601.178	4.85577e+08	TG(16:0_16:1_18:1)+NH4	TG(50:2)+NH4	TG	C53 H102 O6 N1	848.77	A	848.769	-1.07	601.178	848.77	-0.12	601.05	3	3	21.8816	1.84439	1.83967e+07	4.0255e+06		3	3	7.52328	7.44939	2.09259e+07	1.57431e+06		3	3	27.9137	1.0328	1.58172e+07	4.41518e+06		3	3	17.0259	8.55887	6.98598e+08	1.18943e+08		3	3	2.92828	1.87977	7.46454e+08
9938	M847T592	846.753	591.678	3.80178e+08	TG(18:1_14:0_18:2)+NH4	TG(50:3)+NH4	TG	C53 H100 O6 N1	846.755	A	846.753	-1.24	591.678	846.754	-0.21	591.39	3	3	30.6248	1.03452	1.53494e+07	4.70072e+06		3	3	17.6931	0.112574	1.70684e+07	3.01994e+06		3	3	47.2328	0.331986	1.13741e+07	5.37229e+06		3	3	10.0394	0.879209	5.58464e+08	5.60663e+07		3	3	1.46351	3.27402	5.94951e+08
9976	M850T582	849.693	581.871	5.13146e+07	TG(16:1_16:1_18:2)+Na	TG(50:4)+Na	TG	C53 H94 O6 Na1	849.694	A	849.693	-1.42	581.871	849.694	-0.16	581.4	3	3	31.0095	0.601634	7.0087e+06	2.17336e+06		3	3	20.1295	0.777798	7.61279e+06	1.53242e+06		3	3	43.3859	2.25581	5.28437e+06	2.29267e+06		3	3	5.68114	1.23951	6.21787e+07	3.53246e+06		3	3	1.36071	0.732652	6.34762e+07
9912	M845T582	844.738	581.946	1.17681e+08	TG(16:1_16:1_18:2)+NH4	TG(50:4)+NH4	TG	C53 H98 O6 N1	844.739	A	844.738	-1.05	581.946	844.739	-0.14	581.52	3	3	39.345	2.05265	5.0548e+06	1.98881e+06		3	3	26.1416	1.60308	5.60151e+06	1.46432e+06		3	3	57.365	0.127699	3.51497e+06	2.01636e+06		3	3	10.8403	1.15183	2.01666e+08	2.18612e+07		3	3	4.81137	1.29831	2.25634e+08
9874	M843T573	842.722	573.237	2.06619e+07	TG(18:2_14:1_18:2)+NH4	TG(50:5)+NH4	TG	C53 H96 O6 N1	842.723	A	842.722	-0.86	573.237	842.723	-0.15	571.5	3	3	48.5942	1.93205	1.25275e+06	608766		3	3	31.0129	3.13154	1.33258e+06	413271		3	3	57.3028	4.03816	818945	469279		3	3	10.9942	1.51791	3.1671e+07	3.48198e+06		3	3	6.55876	2.3887	3.62066e+07
9844	M841T565	840.707	565.301	3.65359e+06	TG(18:2_14:2_18:2)+NH4	TG(50:6)+NH4	TG	C53 H94 O6 N1	840.708	A	840.707	-0.31	565.301	840.708	-0.06	564.9	3	3	70.108	12.0383	223049	156375		3	2	40.417	13.2185	254724	102952		3	1	77.7761	NaN	125077	97280.1		3	3	11.6783	1.79971	5.00923e+06	584994		3	3	6.57044	1.89037	5.80409e+06
10179	M863T606	862.785	605.931	3.65086e+07	TG(16:1_17:0_18:1)+NH4	TG(51:2)+NH4	TG	C54 H104 O6 N1	862.786	A	862.785	-0.83	605.931	862.786	-0.09	606	3	3	10.5023	2.59084	900033	94524.5		3	3	4.36148	2.22404	1.0095e+06	44029		3	3	24.6419	7.06726	858467	211543		3	3	16.4974	5.89459	7.84487e+07	1.2942e+07		3	3	7.8588	2.75507	9.21686e+07
10111	M859T588	858.754	587.57	1.70005e+07	TG(15:0_18:2_18:2)+NH4	TG(51:4)+NH4	TG	C54 H100 O6 N1	858.755	A	858.754	-1.17	587.57	858.754	-0.07	587.355	3	3	39.6989	4.30263	624955	248100		3	3	23.403	2.75362	666376	155952		3	2	54.5405	2.70318	439174	239528		3	3	6.75887	0.766378	2.96657e+07	2.00507e+06		3	3	4.38692	3.52098	3.26228e+07
10465	M882T611	881.755	610.749	1.07925e+08	TG(16:0_18:1_18:1)+Na	TG(52:2)+Na	TG	C55 H102 O6 Na1	881.757	A	881.755	-1.8	610.749	881.757	-0.15	610.56	3	3	14.1223	12.0414	2.4424e+07	3.44925e+06		3	3	4.62512	12.3465	2.94981e+07	1.36432e+06		3	3	22.9757	4.47553	2.3795e+07	5.46707e+06		3	3	0.834336	1.82963	1.23295e+08	1.02869e+06		3	3	14.0223	6.0857	1.31342e+08
10434	M880T602	879.739	602.011	1.2173e+08	TG(16:0_18:1_18:2)+Na	TG(52:3)+Na	TG	C55 H100 O6 Na1	879.741	A	879.739	-2.06	602.011	879.741	-0.22	601.98	3	3	11.5996	8.69113	4.25503e+07	4.93569e+06		3	3	6.08017	10.4074	3.92672e+07	2.38751e+06		3	3	25.642	1.46777	3.69141e+07	9.46553e+06		3	3	12.4357	12.5357	1.52268e+08	1.89356e+07		3	3	13.4471	12.3938	1.37065e+08
10341	M873T593	872.769	592.654	9.53763e+08	TG(16:0_18:2_18:2)+NH4	TG(52:4)+NH4	TG	C55 H102 O6 N1	872.77	A	872.769	-1.31	592.654	872.77	-0.03	592.38	3	3	28.8018	0.176951	4.214e+07	1.21371e+07		3	3	18.4134	0.712742	4.69991e+07	8.65413e+06		3	3	47.4782	1.29923	3.14313e+07	1.4923e+07		3	3	7.13738	1.57051	1.41205e+09	1.00784e+08		3	3	3.94654	2.13202	1.48868e+09
10279	M869T576	868.738	576.256	3.66402e+07	TG(16:0_18:3_18:3)+NH4	TG(52:6)+NH4	TG	C55 H98 O6 N1	868.739	A	868.738	-0.82	576.256	868.739	-0.02	577.02	3	3	47.3071	2.42332	2.29065e+06	1.08364e+06		3	3	32.2395	2.86378	2.43267e+06	784280		3	3	59.5981	1.44153	1.52115e+06	906578		3	3	8.71006	2.81801	5.85597e+07	5.10058e+06		3	3	8.59514	3.06343	6.66163e+07
10679	M896T615	895.772	615.167	1.10953e+07	TG(17:0_18:1_18:1)+Na	TG(53:2)+Na	TG	C56 H104 O6 Na1	895.773	A	895.772	-0.87	615.167	895.772	-0.1	615.403	3	3	19.6577	19.7601	431537	84830.1		3	3	16.4227	3.41935	412298	67710.4		3	3	7.26569	8.04291	408517	29681.6		3	3	4.30749	13.7802	1.84435e+07	794452		3	3	11.9634	3.12294	2.03116e+07
10573	M889T606	888.8	606.304	3.3037e+07	TG(17:0_18:1_18:2)+NH4	TG(53:3)+NH4	TG	C56 H106 O6 N1	888.801	A	888.8	-1.18	606.304	888.801	-0.09	606.214	3	2	14.4169	1.24458	923418	133128		3	3	8.38705	3.72878	1.02732e+06	86162.1		3	3	27.752	5.64802	812845	225581		3	3	9.92182	3.48058	7.21037e+07	7.154e+06		3	3	11.2221	3.58612	8.19687e+07
10616	M892T597	891.74	597.284	4.64768e+06	TG(17:0_18:2_18:2)+Na	TG(53:4)+Na	TG	C56 H100 O6 Na1	891.741	A	891.74	-1.54	597.284	891.741	-0.2	597.06	3	3	17.5366	1.22699	845851	148333		3	3	13.3493	1.94603	965284	128859		3	3	35.0757	1.38439	728425	255500		3	3	6.29223	1.8717	4.4495e+06	279973		3	3	5.65772	1.92543	4.73892e+06
10505	M885T588	884.769	588.363	1.28149e+07	TG(16:0_17:1_20:4)+NH4	TG(53:5)+NH4	TG	C56 H102 O6 N1	884.77	A	884.769	-1.32	588.363	884.77	-0.11	593.67	2	1	58.8963	NaN	479268	282271		3	1	26.1494	NaN	571042	149324		1	2	NaN	0.291906	176910	NaN		3	3	6.53258	1.71231	2.04895e+07	1.33849e+06		3	3	5.03925	3.32407	2.202e+07
10481	M883T583	882.753	583.452	4.99826e+06	TG(15:0_18:1_20:5)+NH4	TG(53:6)+NH4	TG	C56 H100 O6 N1	882.755	A	882.753	-1.96	583.452	882.754	-0.05	583.62	0	0	NaN	NaN	NaN	NaN		0	0	NaN	NaN	NaN	NaN		0	0	NaN	NaN	NaN	NaN		2	3	1.2023	2.11863	6.06167e+06	72879.1		3	2	6.37414	0.534816	6.95223e+06
10876	M910T620	909.787	619.96	3.52659e+07	TG(18:0_18:1_18:1)+Na	TG(54:2)+Na	TG	C57 H106 O6 Na1	909.788	A	909.787	-1.38	619.96	909.788	-0.12	619.981	2	3	9.53375	3.54243	1.22465e+06	116755		3	3	20.2228	3.95215	1.38128e+06	279333		3	3	11.7723	1.97182	1.47082e+06	173149		3	3	7.31658	6.06438	4.9091e+07	3.59178e+06		3	3	15.4386	6.64338	5.28612e+07
10848	M908T612	907.771	611.612	4.0513e+07	TG(18:1_18:1_18:1)+Na	TG(54:3)+Na	TG	C57 H104 O6 Na1	907.773	A	907.771	-1.92	611.612	907.772	-0.24	611.947	3	3	20.6524	16.3423	7.7773e+06	1.6062e+06		3	3	4.95711	2.59251	9.43379e+06	467643		3	3	6.61895	0.913965	6.65283e+06	440348		3	3	11.4593	8.28732	5.19543e+07	5.95359e+06		3	3	10.393	10.162	5.09388e+07
10796	M904T594	903.739	593.878	8.40302e+07	TG(18:1_18:2_18:2)+Na	TG(54:5)+Na	TG	C57 H100 O6 Na1	903.741	B	903.739	-2.08	593.878	903.741	-0.18	599.07	3	3	19.2467	0.669778	2.04916e+07	3.94395e+06		3	3	13.6659	2.28948	2.31155e+07	3.15893e+06		3	3	32.9142	0.538574	1.68993e+07	5.56228e+06		3	3	6.86083	0.459936	8.44359e+07	5.79301e+06		3	3	17.0814	14.2639	9.93005e+07
10695	M897T589	896.769	589.126	2.34631e+08	TG(16:0_18:2_20:4)+NH4	TG(54:6)+NH4	TG	C57 H102 O6 N1	896.77	B	896.769	-1.31	589.126	896.77	-0.17	589.14	0	0	NaN	NaN	NaN	NaN		0	1	NaN	NaN	NaN	NaN		1	0	NaN	NaN	6.88313e+06	NaN		3	3	10.5398	4.72563	2.62956e+08	2.77151e+07		3	3	11.4064	2.90739	2.81928e+08
10632	M893T570	892.739	570.211	8.65397e+06	TG(18:3_18:2_18:3)+NH4	TG(54:8)+NH4	TG	C57 H98 O6 N1	892.739	A	892.739	0.18	570.211	892.739	-0.17	572.37	1	0	NaN	NaN	1.01592e+06	NaN		1	0	NaN	NaN	964053	NaN		1	1	NaN	NaN	201069	NaN		3	3	9.71088	2.04637	1.20221e+07	1.16745e+06		3	3	7.52932	2.21893	1.36769e+07
11110	M927T607	926.816	607.492	7.91181e+07	TG(16:0_18:1_22:4)+NH4	TG(56:5)+NH4	TG	C59 H108 O6 N1	926.817	A	926.816	-1.3	607.492	926.817	-0.15	608.46	2	3	13.9345	1.00083	1.76253e+06	245599		1	3	NaN	4.36084	2.00009e+06	NaN		2	2	17.9247	0.986073	1.38026e+06	247407		3	3	10.3239	1.70959	1.37408e+08	1.41858e+07		3	3	15.1089	0.972956	1.5339e+08
11081	M925T598	924.8	598.353	1.48296e+08	TG(18:1_18:1_20:4)+NH4	TG(56:6)+NH4	TG	C59 H106 O6 N1	924.801	A	924.8	-1.54	598.353	924.801	-0.14	599.22	3	3	23.2346	3.44994	6.58814e+06	1.53073e+06		3	3	14.1678	3.84312	6.94862e+06	984469		3	3	40.1754	4.46408	4.95177e+06	1.98939e+06		3	3	8.76351	1.67316	2.02359e+08	1.77337e+07		3	3	11.8309	2.6473	2.13673e+08
11047	M923T589	922.784	589.445	1.41241e+08	TG(16:0_18:2_22:5)+NH4	TG(56:7)+NH4	TG	C59 H104 O6 N1	922.786	A	922.784	-1.84	589.445	922.786	-0.08	589.56	3	3	38.4739	4.98951	7.21681e+06	2.77659e+06		3	3	28.868	6.538	7.78605e+06	2.24768e+06		3	3	55.1742	6.27123	5.0099e+06	2.76417e+06		3	3	9.16	2.45851	2.33043e+08	2.13468e+07		3	3	9.60301	1.6294	2.4903e+08
11017	M921T582	920.769	582.004	6.25253e+07	TG(18:2_18:2_20:4)+NH4	TG(56:8)+NH4	TG	C59 H102 O6 N1	920.77	A	920.769	-1.34	582.004	920.77	-0.14	579.87	3	3	43.7191	1.62428	3.66194e+06	1.60097e+06		3	3	30.6056	1.56135	3.96088e+06	1.21225e+06		3	3	58.2647	1.41253	2.44563e+06	1.42494e+06		3	3	7.50029	2.10031	1.09667e+08	8.22533e+06		3	3	10.4031	2.08353	1.23048e+08
10991	M919T571	918.754	571.418	1.03555e+07	TG(20:5_18:2_18:2)+NH4	TG(56:9)+NH4	TG	C59 H100 O6 N1	918.755	A	918.754	-0.1	571.418	918.754	-0.19	570.03	3	3	51.7506	1.21624	856048	443010		3	3	35.9598	4.77894	880047	316463		3	2	59.538	1.67676	523206	311506		3	3	9.51804	1.5784	1.6238e+07	1.54554e+06		3	3	8.86642	4.56977	1.85475e+07
11303	M945T576	944.769	575.761	9.74903e+06	TG(18:2_18:2_22:6)+NH4	TG(58:10)+NH4	TG	C61 H102 O6 N1	944.77	A	944.769	-0.81	575.761	944.77	-0.12	575.7	3	3	54.8098	3.28001	748932	410488		3	3	32.8917	3.42509	829319	272777		3	3	65.9915	2.11097	484559	319768		3	3	9.45166	2.95352	1.62e+07	1.53117e+06		3	3	12.3041	3.26317	1.86864e+07
11548	M974T571	973.725	570.811	1.71849e+06	TG(20:4_20:4_20:4)+Na	TG(60:12)+Na	TG	C63 H98 O6 Na1	973.726	A	973.725	-1.03	570.811	973.725	-0.13	570.33	3	3	61.6707	2.44849	222549	137248		3	3	40.9419	4.97859	253394	103745		2	2	72.4339	7.07803	171101	123935		3	3	5.73601	5.67784	2.12043e+06	121628		3	3	9.85136	8.08895	2.26833e+06
[truncated: 97 more columns]

## Sheet: PLASMA_C18_RP_LIPIDS_NEG
TABLE S1B: PLASMA UHPLC-MS C18 LIPID NEGATIVE ION ASSAY: COMPOUNDS IDENTIFIED USING MS/MS DATABASE MATCHES
INITIAL FILTERING - peaks retained:
- where present in <70% QC samples; - where QC RSD<30%, - where blank filter >5%
- XCMS minfrac =0.2
- peaks with a putative ID
- the highest peak intensity ionform for each putative ID
MS/MS Identification
- QC MS/MS files were submitted to Thermo Fisher Lipid Search to annotate lipid compounds based on MS/MS spectral matches to databases.																	100% ACN; no incubation							100% ACN; 60 min, -20oC incubation							100% ACN; 60 min, 4oC incubation							CHCl3; 1 min partition time							CHCl3; 20 min partition time
					LIPID SEARCH ID (MS/MS)												Sample prep replicates	UHPLC-MS injection replicates	Sample prep replicates	UHPLC-MS injection replicates	Sample prep replicates	Sample prep replicates		Sample prep replicates	UHPLC-MS injection replicates	Sample prep replicates	UHPLC-MS injection replicates	Sample prep replicates	Sample prep replicates		Sample prep replicates	UHPLC-MS injection replicates	Sample prep replicates	UHPLC-MS injection replicates	Sample prep replicates	Sample prep replicates		Sample prep replicates	UHPLC-MS injection replicates	Sample prep replicates	UHPLC-MS injection replicates	Sample prep replicates	Sample prep replicates		Sample prep replicates	UHPLC-MS injection replicates	Sample prep replicates	UHPLC-MS injection replicates	Sample prep replicates
IDX	name	MZ	RT	MPA	LipidIon	LipidGroup	Class	IonFormula	theor_mass	Grade	XCMS_mz	XCMS_mz_ppm	XCMS_rt	lipidsearch_mz	lipidsearch_mz_ppm	lipidsearch_rt	# reps a peak is present in	# reps a peak is present in	RSD (%)	RSD (%)	Mean	Standard deviation		# reps a peak is present in	# reps a peak is present in	RSD (%)	RSD (%)	Mean	Standard deviation		# reps a peak is present in	# reps a peak is present in	RSD (%)	RSD (%)	Mean	Standard deviation		# reps a peak is present in	# reps a peak is present in	RSD (%)	RSD (%)	Mean	Standard deviation		# reps a peak is present in	# reps a peak is present in	RSD (%)	RSD (%)	Mean
2265	M611T505	610.543	504.58	1.65143e+06	Cer(d36:1)+HCOO	Cer(d36:1)+HCOO	Cer	C37 H72 O5 N1	610.542	C	610.543	1.65	504.58	610.542	0.13	503.91	0	0	NaN	NaN	NaN	NaN		0	0	NaN	NaN	NaN	NaN		0	0	NaN	NaN	NaN	NaN		3	3	33.5893	0.662206	1.62461e+06	545694		3	3	24.762	1.12253	1.91532e+06
2367	M639T524	638.574	523.882	2.61172e+06	Cer(d38:1)+HCOO	Cer(d38:1)+HCOO	Cer	C39 H76 O5 N1	638.573	C	638.574	1.7	523.882	638.573	0.01	523.47	0	0	NaN	NaN	NaN	NaN		0	0	NaN	NaN	NaN	NaN		0	0	NaN	NaN	NaN	NaN		3	3	35.6679	1.8437	2.58012e+06	920274		3	3	30.6866	2.58251	3.16464e+06
2470	M667T541	666.606	540.502	9.44373e+06	Cer(d40:1)+HCOO	Cer(d40:1)+HCOO	Cer	C41 H80 O5 N1	666.604	C	666.606	2.37	540.502	666.604	0.1	539.97	2	0	68.5954	NaN	24251.9	16635.7		2	1	10.2356	NaN	43057.5	4407.17		1	2	NaN	9.55363	37924.3	NaN		3	3	29.9462	0.7239	1.10903e+07	3.32112e+06		3	3	22.6721	0.479803	1.34444e+07
2461	M665T525	664.59	524.678	3.61716e+06	Cer(d40:2)+HCOO	Cer(d40:2)+HCOO	Cer	C41 H78 O5 N1	664.589	C	664.59	2.17	524.678	664.589	0.15	521.91	2	1	61.4716	NaN	53098.4	32640.5		3	3	22.7213	4.02512	48928.8	11117.3		2	3	57.7111	7.49428	34323.4	19808.4		3	3	35.9625	0.709289	4.10073e+06	1.47472e+06		3	3	29.7821	3.25064	4.97101e+06
2538	M681T548	680.622	547.877	7.65526e+06	Cer(d41:1)+HCOO	Cer(d41:1)+HCOO	Cer	C42 H82 O5 N1	680.62	C	680.622	2.54	547.877	680.62	0.1	544.62	1	0	NaN	NaN	12321.8	NaN		0	0	NaN	NaN	NaN	NaN		0	0	NaN	NaN	NaN	NaN		3	3	27.8582	0.324166	1.00191e+07	2.79114e+06		3	3	20.7743	0.954229	1.21251e+07
2616	M695T555	694.637	555.414	7.23804e+06	Cer(d42:1)+HCOO	Cer(d42:1)+HCOO	Cer	C43 H84 O5 N1	694.635	C	694.637	2.62	555.414	694.636	0.13	553.14	2	0	60.5463	NaN	29789.4	18036.4		3	3	24.1544	2.74488	59253.5	14312.3		2	3	57.4243	6.86816	48507.1	27854.9		3	3	27.4183	1.44381	2.71068e+07	7.43223e+06		3	3	15.4665	1.99056	3.20506e+07
2603	M693T541	692.621	540.943	1.12737e+07	Cer(d42:2)+HCOO	Cer(d42:2)+HCOO	Cer	C43 H82 O5 N1	692.62	C	692.621	2.38	540.943	692.62	-0.01	539.46	3	3	50.2986	2.71131	151552	76228.7		3	3	27.681	2.6184	179805	49771.7		3	3	38.3256	3.68753	135141	51793.8		3	3	31.9342	0.900913	1.67537e+07	5.35015e+06		3	3	24.1847	1.09971	2.02006e+07
2926	M745T463	744.565	463.402	2.63085e+06	Hex1Cer(d34:1)+HCOO	Hex1Cer(d34:1)+HCOO	Hex1Cer	C41 H78 O10 N1	744.563	C	744.565	2.52	463.402	744.563	0.23	462.15	2	1	66.5888	NaN	132696	88361		1	2	NaN	21.4249	98009.1	NaN		3	3	21.6518	6.35794	86040.5	18629.3		3	3	14.8117	6.72309	3.05487e+06	452478		3	3	12.589	5.27479	3.16921e+06
3303	M801T508	800.628	507.964	973030	Hex1Cer(d38:1)+HCOO	Hex1Cer(d38:1)+HCOO	Hex1Cer	C45 H86 O10 N1	800.626	C	800.628	2.61	507.964	800.626	0.1	507.54	0	0	NaN	NaN	NaN	NaN		0	0	NaN	NaN	NaN	NaN		0	0	NaN	NaN	NaN	NaN		3	3	35.1008	2.79464	829453	291144		3	3	22.9651	5.10303	1.01908e+06
3472	M829T526	828.659	526.08	6.49508e+06	Hex1Cer(d40:1)+HCOO	Hex1Cer(d40:1)+HCOO	Hex1Cer	C47 H90 O10 N1	828.657	C	828.659	2.3	526.08	828.657	-0.05	525.03	0	0	NaN	NaN	NaN	NaN		0	0	NaN	NaN	NaN	NaN		0	0	NaN	NaN	NaN	NaN		3	3	33.321	3.33049	6.07536e+06	2.02437e+06		3	3	26.4226	1.71613	7.27583e+06
3575	M843T534	842.675	534.329	1.9155e+06	Hex1Cer(d41:1)+HCOO	Hex1Cer(d41:1)+HCOO	Hex1Cer	C48 H92 O10 N1	842.673	C	842.675	2.52	534.329	842.673	-0.01	533.79	0	0	NaN	NaN	NaN	NaN		0	0	NaN	NaN	NaN	NaN		0	0	NaN	NaN	NaN	NaN		3	3	24.1302	3.61146	1.9235e+06	464144		3	3	19.3732	3.90326	2.14506e+06
3685	M857T542	856.691	542.322	4.84014e+06	Hex1Cer(d42:1)+HCOO	Hex1Cer(d42:1)+HCOO	Hex1Cer	C49 H94 O10 N1	856.688	C	856.691	2.76	542.322	856.688	0.11	541.26	0	0	NaN	NaN	NaN	NaN		0	0	NaN	NaN	NaN	NaN		0	0	NaN	NaN	NaN	NaN		3	3	22.6309	2.23558	5.19166e+06	1.17492e+06		3	3	17.3947	0.910264	6.05678e+06
4032	M907T455	906.618	454.879	2.07905e+06	Hex2Cer(d34:1)+HCOO	Hex2Cer(d34:1)+HCOO	Hex2Cer	C47 H88 O15 N1	906.616	C	906.618	1.84	454.879	906.616	0.18	453.42	3	3	25.3701	8.41389	71943	18252		3	3	18.0349	12.6467	54814.8	9885.79		3	3	6.03793	4.59669	77947.2	4706.4		3	3	22.4987	2.35628	2.45059e+06	551353		3	3	12.928	6.84981	2.66619e+06
1865	M540T141	540.332	140.601	1.91826e+08	LPC(16:0)+HCOO	LPC(16:0)+HCOO	LPC	C25 H51 O9 N1 P1	540.331	A	540.332	1.53	140.601	540.331	0.06	140.25	3	3	6.47032	0.903631	1.77136e+08	1.14613e+07		3	3	3.90901	0.440286	1.8852e+08	7.36927e+06		3	3	0.579077	2.10777	1.82981e+08	1.0596e+06		3	3	26.9756	0.747762	1.44475e+08	3.8973e+07		3	3	12.6524	0.197931	1.61341e+08
1856	M538T99	538.316	99.1359	3.30202e+06	LPC(16:1)+HCOO	LPC(16:1)+HCOO	LPC	C25 H49 O9 N1 P1	538.315	A	538.316	1.78	99.1359	538.315	0.11	99.3	3	3	3.61663	0.653888	3.19422e+06	115523		3	3	4.53474	1.70843	3.46363e+06	157067		3	3	2.52036	1.03436	3.28651e+06	82831.8		3	3	27.7315	1.17476	2.2191e+06	615390		3	3	13.8996	1.37273	2.50373e+06
1997	M568T223	568.363	222.918	6.56774e+07	LPC(18:0)+HCOO	LPC(18:0)+HCOO	LPC	C27 H55 O9 N1 P1	568.362	A	568.363	1.79	222.918	568.362	0.17	222.48	3	3	9.32477	0.899848	4.93226e+07	4.59922e+06		3	3	7.18885	1.31056	5.30417e+07	3.81309e+06		3	3	3.08052	1.9781	5.14936e+07	1.58627e+06		3	3	27.8031	1.07545	5.25912e+07	1.4622e+07		3	3	16.8124	0.208624	5.97884e+07
1987	M566T157	566.347	156.557	2.84965e+07	LPC(18:1)+HCOO	LPC(18:1)+HCOO	LPC	C27 H53 O9 N1 P1	566.346	A	566.347	1.82	156.557	566.346	0	156.27	3	3	3.24513	1.19523	2.72351e+07	883814		3	3	4.22878	2.11925	2.98116e+07	1.26067e+06		3	3	1.72968	2.01267	2.79926e+07	484182		3	3	27.9388	0.893744	2.17246e+07	6.06958e+06		3	3	16.4973	1.00334	2.47486e+07
1975	M564T112	564.332	111.542	4.56458e+07	LPC(18:2)+HCOO	LPC(18:2)+HCOO	LPC	C27 H51 O9 N1 P1	564.331	A	564.332	1.82	111.542	564.331	0.02	110.64	3	3	2.23355	1.13427	4.44694e+07	993246		3	3	4.5578	0.783441	4.85659e+07	2.21353e+06		3	3	2.08981	1.56785	4.54941e+07	950740		3	3	28.8307	2.1926	3.31404e+07	9.55462e+06		3	3	14.8533	1.31044	3.74907e+07
2116	M590T130	590.348	130.376	3.26384e+06	LPC(20:3)+HCOO	LPC(20:3)+HCOO	LPC	C29 H53 O9 N1 P1	590.346	A	590.348	2.06	130.376	590.346	0.07	129.9	3	3	3.89943	1.61306	3.21287e+06	125284		3	3	3.3508	0.930283	3.38837e+06	113538		3	3	2.44601	1.51567	3.20905e+06	78493.7		3	3	29.5365	1.09145	2.45458e+06	724999		3	3	15.4441	0.72383	2.74652e+06
2098	M588T107	588.332	106.851	1.36681e+07	LPC(20:4)+HCOO	LPC(20:4)+HCOO	LPC	C29 H51 O9 N1 P1	588.331	A	588.332	1.96	106.851	588.331	0.06	105.98	3	3	4.12185	0.442734	1.33338e+07	549600		3	3	4.66468	1.03693	1.4429e+07	673064		3	3	3.20003	2.0439	1.35897e+07	434874		3	3	28.4936	0.804072	1.01367e+07	2.88831e+06		3	3	15.4534	2.13119	1.13528e+07
1607	M478T158	478.295	157.783	2.75265e+06	LPE(18:1)-H	LPE(18:1)-H	LPE	C23 H45 O7 N1 P1	478.294	A	478.295	1.57	157.783	478.294	0.01	157.53	3	3	4.55332	1.45452	2.49514e+06	113612		3	3	3.54037	2.8268	2.73226e+06	96732.3		3	3	1.03671	1.21838	2.57054e+06	26649.1		3	3	27.76	2.18991	2.0598e+06	571801		3	3	15.5965	1.89871	2.33755e+06
1599	M476T112	476.279	112.029	4.74431e+06	LPE(18:2)-H	LPE(18:2)-H	LPE	C23 H43 O7 N1 P1	476.278	A	476.279	1.47	112.029	476.278	-0.01	111.78	3	3	6.66535	0.74452	4.60993e+06	307268		3	3	10.7469	0.958768	5.07052e+06	544923		3	3	6.58418	8.33018	4.72511e+06	311110		3	3	29.4304	0.479831	3.17114e+06	933279		3	3	14.8114	1.15425	3.5945e+06
1686	M500T108	500.279	107.524	3.9444e+06	LPE(20:4)-H	LPE(20:4)-H	LPE	C25 H43 O7 N1 P1	500.278	A	500.279	1.88	107.524	500.278	0.02	107.1	3	3	5.53543	4.89538	3.76356e+06	208329		3	3	2.73189	0.760463	4.01775e+06	109761		3	3	8.58588	7.11806	3.9832e+06	341993		3	3	23.3396	7.85975	2.80291e+06	654188		3	3	14.5911	7.26504	3.11886e+06
1803	M524T100	524.279	100.317	1.75693e+06	LPE(22:6)-H	LPE(22:6)-H	LPE	C27 H43 O7 N1 P1	524.278	A	524.279	1.69	100.317	524.278	-0.01	99.63	3	3	4.14564	4.63975	1.69181e+06	70136.3		3	3	4.56592	4.12948	1.84067e+06	84043.5		3	3	1.65563	1.96946	1.72449e+06	28551.1		3	3	28.3283	1.3779	1.26268e+06	357695		3	3	15.2807	3.94388	1.45408e+06
3156	M779T483	778.562	483.469	7.85349e+06	PC(16:0_16:0)+HCOO	PC(32:0)+HCOO	PC	C41 H81 O10 N1 P1	778.56	A	778.562	2.1	483.469	778.56	0.09	481.26	3	3	31.0123	2.93254	1.06332e+06	329759		3	3	9.94618	1.68481	1.07347e+06	106769		3	3	15.4093	0.769588	984573	151716		3	3	21.5213	0.379604	7.59418e+06	1.63437e+06		3	3	11.9563	1.25865	8.50424e+06
3140	M777T461	776.546	461.084	6.1957e+06	PC(16:0_16:1)+HCOO	PC(32:1)+HCOO	PC	C41 H79 O10 N1 P1	776.545	A	776.546	2.14	461.084	776.545	0.19	458.73	3	3	20.0226	0.708232	2.29567e+06	459653		3	3	10.7028	1.85225	2.68604e+06	287481		3	3	8.38949	2.16624	2.43591e+06	204360		3	3	20.3054	0.591864	5.61502e+06	1.14015e+06		3	3	11.6339	0.676602	6.20381e+06
3125	M775T439	774.531	439.377	2.87846e+06	PC(14:0_18:2)+HCOO	PC(32:2)+HCOO	PC	C41 H77 O10 N1 P1	774.529	A	774.531	2.28	439.377	774.529	0.04	438.84	3	3	19.6933	4.00879	1.2951e+06	255048		3	3	9.84755	0.385692	1.56513e+06	154127		3	3	10.0479	2.34369	1.43415e+06	144102		3	3	25.1945	1.33128	2.45711e+06	619058		3	3	17.2025	2.40106	2.74115e+06
3210	M789T453	788.547	453.022	1.75615e+06	PC(15:0_18:2)+HCOO	PC(33:2)+HCOO	PC	C42 H79 O10 N1 P1	788.545	A	788.547	2.91	453.022	788.545	0.04	452.46	3	3	16.5626	2.08247	736203	121935		3	3	10.3169	0.798147	842711	86941.4		3	3	10.1271	2.41124	779724	78963.1		3	3	22.0814	0.779201	1.53067e+06	337992		3	3	18.082	3.68282	1.67457e+06
3336	M807T506	806.593	506.012	2.38125e+06	PC(18:0_16:0)+HCOO	PC(34:0)+HCOO	PC	C43 H85 O10 N1 P1	806.592	A	806.593	1.74	506.012	806.592	-0.07	503.76	3	1	26.1578	NaN	548984	143602		3	2	15.1965	6.42312	569126	86487.3		3	2	17.7786	2.14451	528732	94001.2		3	3	21.5215	3.03922	2.39434e+06	515298		3	3	13.1017	2.00633	2.70107e+06
3310	M803T465	802.562	465.095	2.74512e+08	PC(16:0_18:2)+HCOO	PC(34:2)+HCOO	PC	C43 H81 O10 N1 P1	802.56	A	802.562	2.1	465.095	802.56	0.08	464.31	3	3	17.7408	1.10439	1.04241e+08	1.84933e+07		3	3	9.97281	0.972735	1.23099e+08	1.22765e+07		3	3	11.4716	1.38027	1.12115e+08	1.28614e+07		3	3	20.9287	2.67656	2.5805e+08	5.40064e+07		3	3	10.9823	0.691328	2.76904e+08
3211	M789T482	788.582	482.429	4.13287e+06	PC(16:0e_18:2)+HCOO	PC(34:2e)+HCOO	PC	C43 H83 O9 N1 P1	788.581	B	788.582	1.4	482.429	788.581	-0.05	482.64	3	3	22.4237	2.49513	1.25784e+06	282053		3	3	11.2713	4.04519	1.42339e+06	160435		3	3	9.49576	2.11989	1.3254e+06	125857		3	3	25.0118	1.84103	3.85422e+06	964011		3	3	15.0177	1.81008	4.31957e+06
3300	M801T445	800.546	445.472	1.32903e+07	PC(16:0_18:3)+HCOO	PC(34:3)+HCOO	PC	C43 H79 O10 N1 P1	800.545	A	800.546	2.22	445.472	800.545	0.11	449.82	3	3	14.3758	1.12328	5.95886e+06	856633		3	3	9.92943	0.267718	7.04201e+06	699231		3	3	8.21438	1.22923	6.50654e+06	534472		3	3	24.8808	1.36432	1.14113e+07	2.83921e+06		3	3	15.9137	2.75009	1.26048e+07
3200	M787T479	786.567	478.839	6.30885e+06	PC(16:1e_18:2)+HCOO	PC(34:3e)+HCOO	PC	C43 H81 O9 N1 P1	786.565	B	786.567	2.29	478.839	786.565	0.02	478.08	3	3	20.3236	0.964291	1.97461e+06	401312		3	3	11.3599	0.9772	2.33688e+06	265468		3	3	10.1886	2.3337	2.14097e+06	218135		3	3	22.9179	1.0412	5.86932e+06	1.34512e+06		3	3	15.2501	2.07719	6.35968e+06
3416	M819T496	818.593	496.495	2.49658e+06	PC(17:0_18:1)+HCOO	PC(35:1)+HCOO	PC	C44 H85 O10 N1 P1	818.592	A	818.593	2.14	496.495	818.592	0.28	495.48	3	3	28.5599	1.92495	479704	137003		3	3	17.2062	5.6242	557997	96010.3		3	3	16.2958	3.66265	491449	80085.7		3	3	24.3357	2.17128	2.42006e+06	588937		3	3	13.3905	3.55921	2.6802e+06
3399	M817T478	816.578	477.677	6.34258e+06	PC(17:0_18:2)+HCOO	PC(35:2)+HCOO	PC	C44 H83 O10 N1 P1	816.576	A	816.578	1.91	477.677	816.576	0.11	477.3	3	3	19.5981	0.54473	1.84063e+06	360728		3	3	9.76976	2.77319	2.24576e+06	219406		3	3	11.131	0.771255	2.01182e+06	223935		3	3	22.7173	0.734626	5.93234e+06	1.34767e+06		3	3	13.9901	0.898458	6.55912e+06
3372	M813T447	812.546	447.325	1.0677e+06	PC(15:0_20:4)+HCOO	PC(35:4)+HCOO	PC	C44 H79 O10 N1 P1	812.545	A	812.546	2.16	447.325	812.545	0.17	447.75	3	3	15.1247	1.7482	468379	70841.1		3	3	11.2422	0.251623	568599	63923.3		3	3	6.00935	5.68711	512586	30803.1		3	3	23.5816	2.31569	925449	218236		3	3	14.9929	1.35385	1.00921e+06
3495	M833T507	832.609	507.181	2.69554e+07	PC(18:0_18:1)+HCOO	PC(36:1)+HCOO	PC	C45 H87 O10 N1 P1	832.607	A	832.609	2.02	507.181	832.607	0.09	508.2	3	3	32.5768	1.28133	3.90228e+06	1.27124e+06		3	3	14.8333	0.192151	4.58673e+06	680364		3	3	17.8646	0.900128	3.87818e+06	692822		3	3	22.9053	0.812174	2.48183e+07	5.68469e+06		3	3	13.8446	0.955433	2.81716e+07
3481	M831T489	830.593	488.922	1.6359e+08	PC(18:0_18:2)+HCOO	PC(36:2)+HCOO	PC	C45 H85 O10 N1 P1	830.592	A	830.593	1.89	488.922	830.592	0.1	485.73	3	3	21.5258	1.45996	4.09085e+07	8.80587e+06		3	3	10.5099	0.372868	4.82419e+07	5.07016e+06		3	3	11.4047	0.841374	4.28265e+07	4.88422e+06		3	3	23.2989	1.7248	1.56489e+08	3.64602e+07		3	3	15.3101	1.02852	1.72562e+08
3469	M829T471	828.578	471.058	9.96051e+07	PC(16:0_20:3)+HCOO	PC(36:3)+HCOO	PC	C45 H83 O10 N1 P1	828.576	A	828.578	1.81	471.058	828.576	0.09	470.7	3	3	17.4381	1.79473	3.69864e+07	6.44972e+06		3	3	9.50974	15.6133	4.37318e+07	4.15879e+06		3	3	7.12037	16.1555	4.27083e+07	3.04099e+06		3	3	22.3577	1.06076	9.20902e+07	2.05892e+07		3	3	13.0007	2.69767	1.00492e+08
3385	M815T502	814.599	501.959	1.89734e+06	PC(18:1e_18:2)+HCOO	PC(36:3e)+HCOO	PC	C45 H85 O9 N1 P1	814.597	B	814.599	2.28	501.959	814.597	0.05	501.21	2	1	29.9027	NaN	474199	141798		3	3	11.4315	0.490652	516201	59009.6		3	2	13.5506	2.50498	450128	60995.1		2	2	18.5671	1.5948	1.58437e+06	294172		2	3	18.2405	0.833	2.05947e+06
3459	M827T460	826.562	459.766	1.61217e+08	PC(16:0_20:4)+HCOO	PC(36:4)+HCOO	PC	C45 H81 O10 N1 P1	826.56	A	826.562	1.87	459.766	826.56	-0.03	460.74	3	3	26.4407	11.5227	7.39957e+07	1.9565e+07		3	3	8.59168	0.959145	8.25286e+07	7.09059e+06		3	3	17.9208	12.4585	8.15799e+07	1.46197e+07		3	3	29.4317	10.4657	1.51792e+08	4.46748e+07		3	3	22.4572	1.15566	1.66316e+08
3460	M827T447	826.562	446.795	2.03733e+07	PC(18:2_18:2)+HCOO	PC(36:4)+HCOO	PC	C45 H81 O10 N1 P1	826.56	A	826.562	2.02	446.795	826.56	-0.06	446.25	2	2	3.34495	1.17542	9.53866e+06	319064		3	3	8.37713	1.9203	1.22207e+07	1.02374e+06		2	2	8.40629	0.0531874	1.09662e+07	921855		2	1	19.9753	NaN	1.56198e+07	3.1201e+06		2	3	1.77841	1.67632	1.81025e+07
3374	M813T477	812.583	477.316	1.2851e+07	PC(16:0e_20:4)+HCOO	PC(36:4e)+HCOO	PC	C45 H83 O9 N1 P1	812.581	A	812.583	1.91	477.316	812.581	0.09	474.84	3	3	15.6408	1.40531	4.55535e+06	712494		3	3	9.64646	1.42853	5.49842e+06	530403		3	3	8.98787	1.43023	5.00893e+06	450196		3	3	23.625	1.19222	1.17012e+07	2.76439e+06		3	3	15.099	0.11832	1.29989e+07
3451	M825T441	824.546	441.143	1.52521e+07	PC(16:0_20:5)+HCOO	PC(36:5)+HCOO	PC	C45 H79 O10 N1 P1	824.545	A	824.546	2.15	441.143	824.545	0.05	440.37	3	3	15.6606	0.950734	7.22687e+06	1.13177e+06		3	3	11.4775	0.3772	8.95111e+06	1.02736e+06		3	3	8.57515	1.25817	8.0484e+06	690163		3	3	25.7668	1.30687	1.30207e+07	3.35503e+06		3	3	15.1768	1.64364	1.46079e+07
3365	M811T472	810.567	472.458	1.04499e+07	PC(16:1e_20:4)+HCOO	PC(36:5e)+HCOO	PC	C45 H81 O9 N1 P1	810.565	A	810.567	2.15	472.458	810.565	0.02	471.45	3	3	13.244	2.08718	3.90889e+06	517693		3	3	10.0247	1.56769	4.69226e+06	470384		3	3	9.23848	1.454	4.2469e+06	392349		3	3	23.7758	1.1852	9.43648e+06	2.2436e+06		3	3	14.8519	0.719063	1.02552e+07
3553	M841T472	840.577	472.141	3.26133e+06	PC(17:0_20:4)+HCOO	PC(37:4)+HCOO	PC	C46 H83 O10 N1 P1	840.576	A	840.577	1.44	472.141	840.576	0.16	468.33	3	3	18.3409	0.932042	1.14096e+06	209263		3	3	9.86814	1.48839	1.39312e+06	137475		3	3	8.71356	3.00044	1.24139e+06	108169		3	3	21.3431	0.704453	3.02217e+06	645024		3	3	12.9799	1.547	3.29015e+06
3555	M841T500	840.614	500.09	7.70258e+06	PC(18:0e_20:4)+HCOO	PC(38:4e)+HCOO	PC	C47 H87 O9 N1 P1	840.612	B	840.614	1.69	500.09	840.613	0.15	499.68	3	3	26.1879	14.193	1.93584e+06	506956		3	3	25.744	4.23066	2.45595e+06	632259		3	3	15.4667	2.61147	2.00896e+06	310719		3	3	13.4562	15.9323	5.91902e+06	796474		3	3	18.5622	15.5185	7.93198e+06
3653	M853T461	852.577	461.068	2.83332e+07	PC(18:1_20:4)+HCOO	PC(38:5)+HCOO	PC	C47 H83 O10 N1 P1	852.576	A	852.577	1.47	461.068	852.576	0.05	461.55	3	3	11.6816	1.16984	1.29582e+07	1.51373e+06		3	3	8.44617	13.5152	1.60366e+07	1.35448e+06		3	3	7.8903	12.9984	1.45907e+07	1.15125e+06		3	3	20.3684	1.11491	2.49639e+07	5.08474e+06		3	3	10.8124	1.39416	2.75614e+07
3545	M839T479	838.598	478.572	9.04367e+06	PC(18:1e_20:4)+HCOO	PC(38:5e)+HCOO	PC	C47 H85 O9 N1 P1	838.597	B	838.598	1.93	478.572	838.597	-0.05	474.54	3	3	13.8516	2.38051	3.52385e+06	488109		3	3	10.1048	2.45286	4.29561e+06	434063		3	3	8.60313	1.81197	4.01501e+06	345417		3	3	23.0388	0.232398	8.08637e+06	1.863e+06		3	3	16.5507	1.36057	8.87666e+06
2744	M717T487	716.525	486.746	2.48174e+06	PE(16:0_18:1)-H	PE(34:1)-H	PE	C39 H75 O8 N1 P1	716.524	A	716.525	2.08	486.746	716.523	-0.14	486.36	3	3	49.9689	1.60057	193774	96826.5		3	3	16.7194	7.25762	196610	32872.1		3	3	29.5188	10.6587	177604	52426.5		3	3	30.4346	2.25773	2.39418e+06	728659		3	3	23.4503	1.57616	2.74489e+06
2731	M715T468	714.509	467.691	5.13664e+06	PE(16:0_18:2)-H	PE(34:2)-H	PE	C39 H73 O8 N1 P1	714.508	B	714.509	1.94	467.691	714.508	0.07	464.79	3	3	33.307	2.5122	653623	217702		3	3	14.3462	3.7067	789655	113285		3	3	21.9518	5.46459	667174	146456		3	3	34.9823	3.62568	5.01029e+06	1.75272e+06		3	3	24.9629	6.54943	5.62023e+06
2641	M699T480	698.515	480.497	3.74528e+06	PE(16:1e_18:2)-H	PE(34:3e)-H	PE	C39 H73 O7 N1 P1	698.513	B	698.515	2.13	480.497	698.513	0.06	479.76	3	3	25.9167	2.60181	506723	131326		3	3	14.5741	2.9669	570383	83128.5		3	3	15.9011	2.38215	525893	83622.7		3	3	32.6436	1.48923	3.42157e+06	1.11692e+06		3	3	19.9117	0.95796	3.87601e+06
2925	M745T507	744.556	506.937	2.08437e+06	PE(18:0_18:1)-H	PE(36:1)-H	PE	C41 H79 O8 N1 P1	744.555	A	744.556	2.12	506.937	744.555	-0.18	506.49	2	3	22.1856	0.816223	89582.7	19874.5		3	3	19.389	2.53708	117552	22792.2		3	3	22.7435	3.76508	98908.3	22495.2		3	3	35.047	2.29694	1.90248e+06	666763		3	3	24.8657	1.81099	2.2842e+06
2913	M743T490	742.541	490.085	1.05808e+07	PE(18:1_18:1)-H	PE(36:2)-H	PE	C41 H77 O8 N1 P1	742.539	A	742.541	2.01	490.085	742.539	-0.07	488.34	3	3	32.4623	3.55622	932795	302807		3	3	15.8397	2.31115	1.07653e+06	170519		3	3	19.2375	0.167407	878138	168931		3	3	33.396	3.02134	1.0137e+07	3.38537e+06		3	3	22.7831	2.0442	1.13701e+07
2821	M729T518	728.562	517.738	1.30341e+06	PE(18:1e_18:1)-H	PE(36:2e)-H	PE	C41 H79 O7 N1 P1	728.56	B	728.562	2.37	517.738	728.56	0.16	516.36	2	3	12.8309	2.70113	47979.2	6156.17		3	3	24.3203	9.75921	71250.6	17328.4		3	3	38.3378	5.83502	60821	23317.4		3	3	25.5179	0.723295	1.29829e+06	331296		3	3	19.1288	2.22361	1.43826e+06
2903	M741T470	740.525	470.333	4.39909e+06	PE(18:1_18:2)-H	PE(36:3)-H	PE	C41 H75 O8 N1 P1	740.524	B	740.525	1.53	470.333	740.524	-0.08	469.8	3	3	24.5364	5.0307	505832	124113		3	3	15.6801	4.54271	629327	98679		3	3	14.8479	1.42897	529236	78580.3		3	3	44.6091	1.20463	3.90718e+06	1.74296e+06		3	3	22.2895	2.36013	4.7759e+06
2810	M727T502	726.546	501.599	5.86549e+06	PE(18:2e_18:1)-H	PE(36:3e)-H	PE	C41 H77 O7 N1 P1	726.544	B	726.546	2.27	501.599	726.544	0.04	498.15	3	3	37.4349	1.63069	620298	232208		3	3	13.4945	2.26434	692424	93438.9		3	3	19.8135	4.04126	607631	120393		3	3	23.9746	0.42791	5.54718e+06	1.32991e+06		3	3	18.2851	2.70755	6.18306e+06
2889	M739T463	738.509	463.039	8.44789e+06	PE(16:0_20:4)-H	PE(36:4)-H	PE	C41 H73 O8 N1 P1	738.508	A	738.509	1.95	463.039	738.508	0.27	461.43	3	3	38.3646	6.18901	1.23779e+06	474873		3	3	17.6902	0.156837	1.5892e+06	281133		3	3	16.4863	4.18914	1.34547e+06	221818		3	3	31.589	5.63957	7.81804e+06	2.46964e+06		3	3	23.8023	3.51774	8.77479e+06
2795	M725T483	724.53	483.148	7.85098e+06	PE(18:2e_18:2)-H	PE(36:4e)-H	PE	C41 H75 O7 N1 P1	724.529	A	724.53	1.9	483.148	724.529	0.15	477.84	3	3	26.681	2.19772	745292	198851		3	3	14.9751	18.6449	1.24099e+06	185840		3	3	19.5899	8.84722	901723	176647		3	3	22.9181	16.6264	6.43799e+06	1.47547e+06		3	3	23.3564	1.63451	8.53159e+06
3087	M769T496	768.556	495.569	1.23908e+06	PE(18:0_20:3)-H	PE(38:3)-H	PE	C43 H79 O8 N1 P1	768.555	A	768.556	2.01	495.569	768.555	-0.04	493.98	3	3	34.3779	9.77933	122229	42019.9		3	2	14.9064	4.30654	133647	19921.9		3	3	30.6882	7.57334	103879	31878.7		1	2	NaN	1.49	1.44725e+06	NaN		2	3	28.1709	0.310312	1.34201e+06
3072	M767T486	766.541	486.023	2.14502e+07	PE(18:0_20:4)-H	PE(38:4)-H	PE	C43 H77 O8 N1 P1	766.539	A	766.541	2.08	486.023	766.539	-0.05	482.13	3	3	37.7648	1.06647	2.11436e+06	798482		3	3	17.2741	3.6425	2.52948e+06	436947		3	3	17.6788	3.31748	2.02027e+06	357161		3	3	32.3371	0.509869	1.9949e+07	6.45095e+06		3	3	18.5359	1.81664	2.2861e+07
3051	M765T465	764.525	464.814	6.69052e+06	PE(16:0_22:5)-H	PE(38:5)-H	PE	C43 H75 O8 N1 P1	764.524	A	764.525	1.86	464.814	764.524	0.11	464.7	3	3	31.4902	2.56033	1.10462e+06	347847		3	3	17.2153	2.108	1.39149e+06	239548		3	3	19.8964	4.39313	1.15718e+06	230237		3	3	39.9402	9.02903	5.96874e+06	2.38393e+06		3	3	14.2586	5.59325	6.87427e+06
2969	M751T497	750.546	496.964	2.0833e+07	PE(18:1e_20:4)-H	PE(38:5e)-H	PE	C43 H77 O7 N1 P1	750.544	A	750.546	2.25	496.964	750.544	0.02	496.47	3	3	30.3183	0.935001	2.60232e+06	788980		3	3	12.6455	1.77183	2.98275e+06	377184		3	3	19.1573	0.775844	2.56672e+06	491713		3	3	30.4464	1.54922	1.95761e+07	5.96021e+06		3	3	22.4834	1.30235	2.24361e+07
3029	M763T455	762.509	454.526	4.67821e+06	PE(16:0_22:6)-H	PE(38:6)-H	PE	C43 H73 O8 N1 P1	762.508	A	762.509	2.04	454.526	762.508	-0.04	453	3	3	21.079	0.326395	1.18385e+06	249545		3	3	11.2362	2.1426	1.43673e+06	161435		3	3	10.3091	1.51398	1.28711e+06	132688		3	3	27.833	1.02542	4.28092e+06	1.19151e+06		3	3	20.8946	4.62984	4.8084e+06
2937	M747T466	746.515	466.238	1.05919e+07	PE(16:1e_22:6)-H	PE(38:7e)-H	PE	C43 H73 O7 N1 P1	746.513	A	746.515	2.02	466.238	746.513	0.11	465.15	3	3	29.6634	0.837142	1.72618e+06	512044		3	3	17.7083	6.62006	2.32552e+06	411810		3	3	21.4322	9.81758	1.89415e+06	405958		3	3	35.0777	4.78278	9.95624e+06	3.49242e+06		3	3	26.4984	5.59719	1.09869e+07
3245	M793T485	792.555	485.274	1.66369e+06	PE(18:0_22:5)-H	PE(40:5)-H	PE	C45 H79 O8 N1 P1	792.555	B	792.555	0.75	485.274	792.555	-0.16	485.19	3	3	35.0071	8.54379	120362	42135.1		3	3	15.9264	7.47893	134066	21351.9		3	3	27.7786	4.88266	127927	35536.3		3	3	59.9774	25.6303	1.56532e+06	938837		3	3	38.3409	0.853716	2.13009e+06
3158	M779T516	778.578	516.178	1.1825e+06	PE(20:1e_20:4)-H	PE(40:5e)-H	PE	C45 H81 O7 N1 P1	778.576	B	778.578	2.72	516.178	778.576	0.01	515.58	0	2	NaN	37.1571	NaN	NaN		2	2	43.5776	8.40721	115844	50482.1		2	3	36.6277	9.37763	67306.9	24652.9		2	2	11.5913	0.630943	1.13439e+06	131490		3	2	8.79023	2.82848	1.43944e+06
3127	M775T489	774.546	489.03	6.96875e+06	PE(18:1e_22:6)-H	PE(40:7e)-H	PE	C45 H77 O7 N1 P1	774.544	A	774.546	1.85	489.03	774.544	0.12	488.67	3	3	37.9661	3.7349	606414	230231		3	3	21.2982	0.723921	762329	162362		3	3	22.5523	9.816	627297	141470		3	3	34.8318	2.84749	6.56196e+06	2.28565e+06		3	3	24.4663	4.3695	7.38177e+06
3113	M773T469	772.53	468.759	3.94775e+06	PE(18:2e_22:6)-H	PE(40:8e)-H	PE	C45 H75 O7 N1 P1	772.529	A	772.53	1.97	468.759	772.529	0.06	468.36	3	3	27.1758	1.32912	580242	157685		3	3	18.1975	4.34781	817319	148732		3	3	16.4034	1.47284	668502	109657		3	3	35.0405	2.30432	3.61948e+06	1.26828e+06		3	3	22.6192	6.12232	4.09403e+06
3518	M836T461	835.535	460.765	2.80878e+06	PI(16:0_18:1)-H	PI(34:1)-H	PI	C43 H80 O13 N0 P1	835.534	A	835.535	1.17	460.765	835.534	0.01	460.41	3	3	34.766	3.03136	196634	68361.6		3	3	13.9309	6.02876	208184	29001.9		3	3	21.3334	9.68611	202853	43275.6		3	3	24.6943	3.0741	3.11724e+06	769779		3	3	23.2166	2.79721	3.71334e+06
3497	M834T441	833.52	440.519	2.76485e+06	PI(16:0_18:2)-H	PI(34:2)-H	PI	C43 H78 O13 N0 P1	833.519	A	833.52	1.91	440.519	833.519	-0.04	438.15	3	3	25.3566	2.69925	547139	138736		3	3	13.6643	0.46084	589742	80584		3	3	18.7843	3.46379	549991	103312		3	3	21.6952	0.986223	2.80778e+06	609153		3	3	14.6168	1.82323	3.12304e+06
3749	M864T483	863.567	482.701	1.96779e+06	PI(18:0_18:1)-H	PI(36:1)-H	PI	C45 H84 O13 N0 P1	863.566	A	863.567	1.54	482.701	863.565	-0.04	482.4	3	3	27.9836	6.22697	100434	28105		3	3	8.86522	2.78629	92908.8	8236.57		3	3	24.5602	12.4957	101772	24995.4		3	3	25.4337	4.48897	2.29786e+06	584430		3	3	18.6382	0.735723	2.68755e+06
3730	M862T465	861.551	465.032	1.00166e+07	PI(18:1_18:1)-H	PI(36:2)-H	PI	C45 H82 O13 N0 P1	861.55	A	861.551	1.55	465.032	861.55	-0.13	461.73	3	3	36.3258	2.42301	915137	332430		3	3	12.4454	5.75965	973518	121159		3	3	24.2729	4.08727	931374	226072		3	3	26.9815	2.49498	1.10246e+07	2.97461e+06		3	3	16.6875	2.36715	1.23976e+07
3709	M860T444	859.535	444.303	2.16497e+06	PI(18:1_18:2)-H	PI(36:3)-H	PI	C45 H80 O13 N0 P1	859.534	A	859.535	0.83	444.303	859.534	-0.04	443.01	3	3	26.0593	3.08328	354263	92318.7		3	3	11.9024	0.431291	389817	46397.6		3	3	14.3201	4.54352	372567	53351.9		3	3	20.6256	1.65328	2.24125e+06	462272		3	3	13.97	1.00326	2.45686e+06
3686	M858T436	857.52	436.165	2.57748e+06	PI(16:0_20:4)-H	PI(36:4)-H	PI	C45 H78 O13 N0 P1	857.519	A	857.52	2.11	436.165	857.519	0.02	434.73	3	3	22.1496	1.28219	619730	137268		3	3	8.48277	4.09692	736927	62511.8		3	3	16.2482	0.371725	689792	112079		3	3	23.0088	1.05149	2.60617e+06	599650		3	3	16.0798	1.6854	2.80871e+06
3924	M888T471	887.568	470.886	3.04911e+06	PI(18:0_20:3)-H	PI(38:3)-H	PI	C47 H84 O13 N0 P1	887.566	A	887.568	2.28	470.886	887.565	-0.01	470.34	3	3	32.6385	3.78491	250644	81806.5		3	3	9.79781	1.79148	265220	25985.7		3	3	23.8499	5.3875	238262	56825.3		2	2	20.6683	1.34212	3.16149e+06	653425		3	3	17.8023	5.33423	4.00754e+06
3893	M884T440	883.536	440.276	1.79166e+06	PI(18:1_20:4)-H	PI(38:5)-H	PI	C47 H80 O13 N0 P1	883.534	A	883.536	2.13	440.276	883.534	0.08	435.57	3	3	19.2414	2.71631	422301	81256.8		3	3	13.3819	1.95954	501056	67050.6		3	3	13.514	2.55684	453243	61251.4		3	3	22.0063	2.36526	1.80749e+06	397762		3	3	16.8598	3.65578	2.02512e+06
2759	M720T427	719.536	427.287	6.08601e+06	SM(d32:1)+HCOO	SM(d32:1)+HCOO	SM	C38 H76 O8 N2 P1	719.534	C	719.536	2.4	427.287	719.535	0.07	426.69	3	3	34.0714	1.95164	1.27784e+06	435377		3	3	10.667	0.525747	1.19755e+06	127742		3	3	12.1054	1.07823	1.17212e+06	141890		3	3	25.9997	1.64823	6.04066e+06	1.57055e+06		3	3	17.2677	0.224603	6.71981e+06
2853	M734T444	733.552	444.29	4.47982e+06	SM(d33:1)+HCOO	SM(d33:1)+HCOO	SM	C39 H78 O8 N2 P1	733.55	C	733.552	2.25	444.29	733.55	0.12	446.64	3	3	39.6588	1.27893	554704	219989		3	3	8.40348	2.62313	475464	39955.5		3	3	12.3844	2.72032	494488	61239.4		3	3	23.0213	0.158777	4.31164e+06	992593		3	3	16.2379	1.64107	4.86997e+06
2947	M748T458	747.567	458.095	8.24711e+07	SM(d34:1)+HCOO	SM(d34:1)+HCOO	SM	C40 H80 O8 N2 P1	747.566	C	747.567	1.99	458.095	747.566	0.16	457.38	3	3	32.3863	0.486852	7.69864e+06	2.4933e+06		3	3	5.7098	1.32261	6.35334e+06	362762		3	3	11.2782	1.34257	6.9333e+06	781949		3	3	18.211	0.309935	8.56563e+07	1.55988e+07		3	3	11.4475	0.708257	9.42383e+07
2933	M746T431	745.552	431.06	8.89412e+06	SM(d34:2)+HCOO	SM(d34:2)+HCOO	SM	C40 H78 O8 N2 P1	745.55	C	745.552	2.39	431.06	745.55	0.15	428.91	3	3	24.9572	0.90755	2.81157e+06	701688		3	3	9.13001	1.55973	2.8943e+06	264250		3	3	10.4318	0.556467	2.74512e+06	286365		3	3	27.0712	3.12035	8.6682e+06	2.34659e+06		3	3	17.8742	0.591341	9.70984e+06
3025	M762T472	761.583	471.594	1.88294e+06	SM(d35:1)+HCOO	SM(d35:1)+HCOO	SM	C41 H82 O8 N2 P1	761.581	C	761.583	2.25	471.594	761.581	0.08	471.12	3	3	40.2594	10.6128	105546	42492.4		3	3	13.2604	7.18021	91004.2	12067.5		3	3	45.8565	40.6267	75221	34493.7		3	3	22.0268	0.539215	2.10417e+06	463479		3	3	12.7154	2.44979	2.26396e+06
3135	M776T484	775.599	483.976	1.38191e+07	SM(d36:1)+HCOO	SM(d36:1)+HCOO	SM	C42 H84 O8 N2 P1	775.597	C	775.599	2.11	483.976	775.597	0.01	482.31	3	3	20.5322	1.3819	735487	151012		3	3	4.17503	2.94474	581892	24294.2		3	3	5.68598	2.14787	709892	40364.3		3	3	19.1261	1.16177	1.60751e+07	3.07454e+06		3	3	11.838	1.31805	1.78827e+07
3122	M774T461	773.583	460.536	7.72261e+06	SM(d36:2)+HCOO	SM(d36:2)+HCOO	SM	C42 H82 O8 N2 P1	773.581	C	773.583	1.99	460.536	773.582	0.19	458.88	3	3	27.6923	1.69242	1.47558e+06	408623		3	3	9.50576	0.770363	1.49962e+06	142550		3	3	13.7363	3.71527	1.42019e+06	195081		3	3	19.9664	0.179898	7.44066e+06	1.48563e+06		3	3	11.0191	0.971145	8.07767e+06
3319	M804T507	803.63	506.779	1.22554e+07	SM(d38:1)+HCOO	SM(d38:1)+HCOO	SM	C44 H88 O8 N2 P1	803.628	C	803.63	2.31	506.779	803.629	0.25	505.32	3	3	19.4958	3.25202	410538	80037.5		3	3	8.01796	2.20665	367218	29443.4		3	3	8.52791	2.81808	413651	35275.8		3	3	21.5981	0.444931	1.47668e+07	3.18936e+06		3	3	12.9021	0.885469	1.65729e+07
3307	M802T485	801.615	485.488	4.30361e+06	SM(d38:2)+HCOO	SM(d38:2)+HCOO	SM	C44 H86 O8 N2 P1	801.613	C	801.615	2.53	485.488	801.613	0.16	484.83	3	3	24.094	3.52091	499733	120405		3	3	7.49592	1.55356	490886	36796.4		3	3	13.8859	1.57723	477643	66325.1		3	3	22.0545	3.85081	4.0674e+06	897043		3	3	12.9732	0.785812	4.59771e+06
3410	M818T518	817.646	517.682	4.07453e+06	SM(d39:1)+HCOO	SM(d39:1)+HCOO	SM	C45 H90 O8 N2 P1	817.644	C	817.646	2.91	517.682	817.644	0.09	516.15	3	3	18.305	15.9795	73031	13368.3		3	3	6.16432	5.81456	74506.7	4592.83		3	3	19.4429	4.45329	78980.5	15356.1		3	3	20.8954	1.3459	4.94213e+06	1.03268e+06		3	3	15.0436	0.908267	5.54239e+06
3489	M832T526	831.662	526.132	2.6529e+07	SM(d40:1)+HCOO	SM(d40:1)+HCOO	SM	C46 H92 O8 N2 P1	831.66	C	831.662	2.23	526.132	831.66	0.13	524.07	3	3	14.7966	0.802723	333631	49366.1		3	3	5.79829	1.526	364322	21124.4		3	3	17.2293	1.77938	431770	74390.9		3	3	21.4753	0.399642	3.43104e+07	7.36826e+06		3	3	12.7334	0.823402	3.82298e+07
3476	M830T508	829.646	507.769	2.08297e+07	SM(d40:2)+HCOO	SM(d40:2)+HCOO	SM	C46 H90 O8 N2 P1	829.644	C	829.646	2.26	507.769	829.644	0.22	506.73	3	3	28.9	2.12847	1.46584e+06	423627		3	3	7.18981	0.769253	1.45111e+06	104332		3	3	16.2052	2.68488	1.39166e+06	225521		3	3	23.1201	0.763414	2.0647e+07	4.7736e+06		3	3	14.1647	0.73206	2.32625e+07
3601	M846T536	845.677	535.781	1.23231e+07	SM(d41:1)+HCOO	SM(d41:1)+HCOO	SM	C47 H94 O8 N2 P1	845.675	C	845.677	2.39	535.781	845.675	0.03	535.71	3	3	19.4925	12.4923	72076.9	14049.6		3	3	5.21001	3.826	89891.9	4683.37		3	3	25.2329	2.46128	106923	26979.8		3	3	21.3338	1.10923	1.59629e+07	3.40548e+06		3	3	12.9368	0.898279	1.80707e+07
3583	M844T518	843.662	518.397	9.34237e+06	SM(d41:2)+HCOO	SM(d41:2)+HCOO	SM	C47 H92 O8 N2 P1	843.66	C	843.662	2.49	518.397	843.66	0	516.33	3	3	26.2082	0.827812	437441	114645		3	3	8.22692	1.22967	434127	35715.3		3	3	20.6048	1.79066	424024	87369.2		3	3	23.1482	0.761063	9.48159e+06	2.19481e+06		3	3	15.4914	0.716172	1.06551e+07
3691	M858T526	857.677	526.343	5.31813e+07	SM(d42:2)+HCOO	SM(d42:2)+HCOO	SM	C48 H94 O8 N2 P1	857.675	C	857.677	2.07	526.343	857.675	0.16	524.28	3	3	23.0962	1.51689	1.78095e+06	411332		3	3	7.8809	0.589153	1.78914e+06	141000		3	3	19.7616	1.16984	1.80537e+06	356769		3	3	22.7131	0.735729	5.51861e+07	1.25345e+07		3	3	14.03	0.914308	6.11141e+07
3676	M856T508	855.661	508.184	2.46929e+07	SM(d42:3)+HCOO	SM(d42:3)+HCOO	SM	C48 H92 O8 N2 P1	855.66	C	855.661	1.92	508.184	855.66	0.08	505.95	3	3	29.5379	0.681839	2.11084e+06	623497		3	3	9.22478	1.44822	2.20593e+06	203492		3	3	16.9829	0.870529	2.05582e+06	349139		3	3	22.1069	1.36188	2.35757e+07	5.21185e+06		3	3	14.7208	0.550531	2.65e+07
3809	M872T533	871.693	533.373	1.8994e+06	SM(d43:2)+HCOO	SM(d43:2)+HCOO	SM	C49 H96 O8 N2 P1	871.691	C	871.693	2.64	533.373	871.691	0.08	531.66	0	0	NaN	NaN	NaN	NaN		0	0	NaN	NaN	NaN	NaN		0	0	NaN	NaN	NaN	NaN		3	3	21.5332	0.822869	1.88034e+06	404899		3	3	15.6863	1.4286	2.09321e+06
[truncated: 97 more columns]

## Sheet: PLASMA_HILIC_POS
TABLE S1C: PLASMA UHPLC-MS HILIC POSITIVE ION ASSAY: COMPOUNDS IDENTIFIED USING MS/MS DATABASE MATCHES
INITIAL FILTERING - peaks retained:
- where present in <70% QC samples; - where QC RSD<30%, - where blank filter >5%
- XCMS minfrac =0.2
- peaks with a putative ID
- the highest peak intensity ionform for each putative ID
MS/MS Identification
- QC MS/MS files were submitted to both Thermo Fisher Compound Discoverer and Thermo Fisher Lipid Search to annotate polar and lipid compounds based on MS/MS spectral matches to databases.																									100% ACN; 60 min, -20oC incubation							100% ACN; no incubation							100% ACN; 60 min, 4oC incubation							CHCl3; 1 min partition
					COMPOUND DISCOVERER MS/MS ID								LIPID SEARCH ID (MS/MS)												Sample prep replicates	UHPLC-MS injection replicates	Sample prep replicates	UHPLC-MS injection replicates	Sample prep replicates	Sample prep replicates		Sample prep replicates	UHPLC-MS injection replicates	Sample prep replicates	UHPLC-MS injection replicates	Sample prep replicates	Sample prep replicates		Sample prep replicates	UHPLC-MS injection replicates	Sample prep replicates	UHPLC-MS injection replicates	Sample prep replicates	Sample prep replicates		Sample prep replicates	UHPLC-MS injection replicates	Sample prep replicates	UHPLC-MS injection replicates
IDX	galaxyIDX	MZ	RT	MPA	XCMS_index	Compound	Formula	RT	mz	Ion	Charge	mzcloud_score	LipidIon	LipidGroup	Class	IonFormula	theor_mass	Grade	XCMS_mz	XCMS_mz_ppm	XCMS_rt	lipidsearch_mz	lipidsearch_mz_ppm	lipidsearch_rt	# reps a peak is present in	# reps a peak is present in	RSD (%)	RSD (%)	Mean	Standard deviation		# reps a peak is present in	# reps a peak is present in	RSD (%)	RSD (%)	Mean	Standard deviation		# reps a peak is present in	# reps a peak is present in	RSD (%)	RSD (%)	Mean	Standard deviation		# reps a peak is present in	# reps a peak is present in	RSD (%)	RSD (%)
4063	M218T383_2	218.139	383.337	7.74996e+07	4063	Propionylcarnitine	C10H19NO4	383.16	218.139	[M+H]+1	1	80.3													3	3	6.29989	6.21181	7.97703e+07	5.02544e+06		3	3	11.6537	6.14925	7.64864e+07	8.9135e+06		3	3	6.41291	5.78779	8.66965e+07	5.55977e+06		3	3	2.34927	4.14161
7941	M316T264	316.248	263.543	1.37448e+07	7941	Decanoylcarnitine	C17H33NO4	263.88	316.248	[M+H]+1	1	89.3	AcCa(10:0)+H	AcCa(10:0)+H	AcCa	C17 H34 O4 N1	316.248	A	316.248	-0.34	263.543	316.248	0.1	263.31	3	3	2.88634	2.05942	1.3085e+07	377679		3	3	8.03276	5.01732	1.51366e+07	1.21589e+06		3	3	11.6839	8.21559	1.40516e+07	1.64177e+06		3	3	3.2249	2.94456
7794	M312T272	312.217	272.496	5.01098e+06									AcCa(10:2)+H	AcCa(10:2)+H	AcCa	C17 H30 O4 N1	312.217	A	312.217	0.04	272.496	312.217	0.1	271.68	3	3	4.55515	0.600146	6.75244e+06	307584		3	3	4.60382	2.02832	6.3329e+06	291556		3	3	9.40381	0.428763	6.5422e+06	615216		3	3	3.21697	0.766151
7661	M308T281	308.186	281.41	889973									AcCa(10:4)+H	AcCa(10:4)+H	AcCa	C17 H26 O4 N1	308.186	B	308.186	0.17	281.41	308.186	0.13	281.25	3	3	6.52106	8.45363	1.21487e+06	79222.4		3	3	7.26385	10.3939	1.17055e+06	85026.6		3	3	9.17637	0.26683	1.25519e+06	115181		3	3	6.46386	3.69997
8930	M344T243	344.28	242.982	1.06516e+06									AcCa(12:0)+H	AcCa(12:0)+H	AcCa	C19 H38 O4 N1	344.28	A	344.28	0.04	242.982	344.28	-0.01	242.85	0	0	NaN	NaN	NaN	NaN		0	0	NaN	NaN	NaN	NaN		0	0	NaN	NaN	NaN	NaN		1	0	NaN	NaN
8797	M342T254	342.264	254.16	8.54428e+06									AcCa(12:1)+H	AcCa(12:1)+H	AcCa	C19 H36 O4 N1	342.264	A	342.264	-0.42	254.16	342.264	0.09	253.89	3	3	29.4516	0.458002	1.26089e+07	3.71352e+06		3	3	5.93965	34.771	1.39823e+07	830502		3	3	46.7182	3.22381	1.19696e+07	5.59196e+06		3	3	31.3354	29.2347
9362	M358T242	358.295	241.86	1.55142e+06									AcCa(13:0)+H	AcCa(13:0)+H	AcCa	C20 H40 O4 N1	358.295	A	358.295	0.35	241.86	358.295	0.04	236.7	3	3	9.1817	12.6952	2.38869e+06	219323		3	3	14.3093	2.11518	1.99065e+06	284847		3	3	9.22058	2.86464	1.81789e+06	167620		0	0	NaN	NaN
10565	M400T239	400.342	238.609	1.19607e+07									AcCa(16:0)+H	AcCa(16:0)+H	AcCa	C23 H46 O4 N1	400.342	A	400.342	-0.26	238.609	400.342	0.15	232.71	3	3	4.55484	2.32292	1.49107e+07	679160		3	3	5.52384	3.81941	1.36259e+07	752671		3	3	8.27272	3.14564	1.49055e+07	1.23309e+06		2	2	1.67446	12.2
10515	M398T237	398.326	236.684	2.86914e+06									AcCa(16:1)+H	AcCa(16:1)+H	AcCa	C23 H44 O4 N1	398.326	A	398.326	-0.07	236.684	398.327	0.13	233.16	3	3	3.82043	4.80408	3.73205e+06	142581		3	3	5.16626	3.74361	3.47596e+06	179577		3	3	8.53421	3.2376	3.76864e+06	321624		3	3	17.2356	49.149
11132	M426T232	426.358	231.741	1.36807e+07									AcCa(18:1)+H	AcCa(18:1)+H	AcCa	C25 H48 O4 N1	426.358	A	426.358	-0.38	231.741	426.358	0.04	231.42	3	3	3.24818	1.32356	1.96423e+07	638018		3	3	7.52101	2.30655	1.83411e+07	1.37944e+06		3	3	8.36697	2.58283	1.96745e+07	1.64616e+06		3	1	36.5038	NaN
5778	M260T299	260.186	299.008	1.00481e+07	5778	Hexanoylcarnitine	C13H25NO4	298.92	260.186	[M+H]+1	1	77.9	AcCa(6:0)+H	AcCa(6:0)+H	AcCa	C13 H26 O4 N1	260.186	A	260.186	0.17	299.008	260.186	0.03	298.74	3	3	6.66056	11.0103	1.36098e+07	906488		3	3	5.68268	9.44943	1.26677e+07	719863		3	3	5.89574	6.48602	1.35687e+07	799976		3	3	2.84064	1.81962
6953	M288T277	288.217	277.002	2.73914e+07									AcCa(8:0)+H	AcCa(8:0)+H	AcCa	C15 H30 O4 N1	288.217	A	288.217	0.33	277.002	288.217	0.13	277.08	3	3	10.4158	5.36492	3.48491e+07	3.62983e+06		3	3	10.3826	12.0179	2.97706e+07	3.09096e+06		3	3	10.4938	4.28663	3.4699e+07	3.64123e+06		3	3	5.07012	1.70176
7465	M302T258	302.233	258.289	1.42117e+06									AcCa(9:0)+H	AcCa(9:0)+H	AcCa	C16 H32 O4 N1	302.233	A	302.233	-0.1	258.289	302.233	0.07	257.07	3	3	6.48224	10.2095	1.35014e+06	87519.6		3	3	4.54626	13.9293	1.41104e+06	64149.6		3	3	11.8909	2.7946	1.47614e+06	175526		3	3	17.4488	23.1462
11931	M468T316	468.308	316.402	1.44587e+07									LPC(14:0)+H	LPC(14:0)+H	LPC	C22 H47 O7 N1 P1	468.308	B	468.308	-0.18	316.402	468.309	0.21	316.047	3	3	14.5375	2.37774	2.09519e+07	3.04589e+06		3	3	4.70726	12.5251	1.87946e+07	884709		3	3	10.2317	8.30988	1.82126e+07	1.86345e+06		3	3	14.7681	4.4547
11679	M454T319	454.329	319.339	206561									LPC(14:0e)+H	LPC(14:0e)+H	LPC	C22 H49 O6 N1 P1	454.329	B	454.329	-0.4	319.339	454.329	0.08	319.23	3	3	2.71915	2.99672	243711	6626.86		3	3	3.24155	3.47983	232426	7534.19		3	3	11.8103	2.22772	239268	28258.1		3	3	11.5057	7.97189
12171	M482T315	482.324	314.963	1.05469e+07									LPC(15:0)+H	LPC(15:0)+H	LPC	C23 H49 O7 N1 P1	482.324	B	482.324	0.51	314.963	482.324	0.33	314.477	3	3	5.06593	5.85461	1.4205e+07	719614		3	3	9.97397	13.3732	1.41351e+07	1.40983e+06		3	3	7.12432	11.9635	1.3476e+07	960076		3	3	10.5858	5.46761
12366	M496T314_2	496.339	313.612	1368414156									LPC(16:0)+H	LPC(16:0)+H	LPC	C24 H51 O7 N1 P1	496.34	B	496.339	-1.11	313.612	496.34	-0.04	312.948	3	3	5.0969	5.44096	1.70979e+09	8.71461e+07		3	3	3.36343	11.9402	1.60659e+09	5.40366e+07		3	3	0.714939	7.42113	1.72058e+09	1.23011e+07		3	3	15.3189	1.78627
12367	M496T307	496.339	307.388	2.65231e+08									LPC(16:0)+H	LPC(16:0)+H	LPC	C24 H51 O7 N1 P1	496.34	B	496.339	-0.75	307.388	496.34	-0.04	312.948	3	3	8.2117	5.4555	2.91349e+08	2.39247e+07		3	2	3.29647	8.15344	2.64585e+08	8.72195e+06		3	3	2.37683	3.39498	2.99224e+08	7.11206e+06		3	3	12.1235	4.63673
12175	M482T317	482.36	316.529	1.27704e+07									LPC(16:0e)+H	LPC(16:0e)+H	LPC	C24 H53 O6 N1 P1	482.361	B	482.36	-0.41	316.529	482.36	-0.05	316.38	3	3	8.24305	8.91473	1.70777e+07	1.40773e+06		3	3	3.02124	5.87752	1.45357e+07	439158		3	3	10.0319	8.401	1.53624e+07	1.54114e+06		3	3	18.7218	3.59775
12337	M494T314	494.324	314.295	2.93488e+07									LPC(16:1)+H	LPC(16:1)+H	LPC	C24 H49 O7 N1 P1	494.324	B	494.324	0.01	314.295	494.324	0.27	314.251	3	3	8.53458	10.8575	4.07096e+07	3.47439e+06		3	3	10.644	11.5455	3.7995e+07	4.04417e+06		3	3	11.3552	15.3498	3.8872e+07	4.41399e+06		3	3	15.4469	7.74321
12144	M480T306	480.345	306.259	1.96324e+07									LPC(16:1e)+H	LPC(16:1e)+H	LPC	C24 H51 O6 N1 P1	480.345	B	480.345	0	306.259	480.345	0.04	306.06	3	3	8.48709	3.22135	2.43301e+07	2.06492e+06		3	3	5.19205	4.42719	2.19161e+07	1.13789e+06		3	3	3.80687	3.46175	2.47101e+07	940680		3	3	19.3191	2.32058
12527	M508T313	508.34	312.918	2.44806e+06									LPC(17:1)+H	LPC(17:1)+H	LPC	C25 H51 O7 N1 P1	508.34	B	508.34	-0.33	312.918	508.34	0.25	312.6	3	3	7.21611	16.0255	3.7943e+06	273801		3	3	13.8991	6.2844	3.28677e+06	456831		3	3	12.8587	2.20054	3.88894e+06	500068		3	3	16.9001	3.56371
12762	M524T311	524.37	311.112	4.52082e+08									LPC(18:0)+H	LPC(18:0)+H	LPC	C26 H55 O7 N1 P1	524.371	B	524.37	-1.56	311.112	524.371	0.12	310.918	3	3	4.41873	6.19152	5.18479e+08	2.29102e+07		3	3	3.7765	11.117	4.79921e+08	1.81242e+07		3	3	6.30296	7.56842	5.32048e+08	3.35347e+07		3	3	22.0895	0.957407
12530	M508T314	508.375	314.47	9.65483e+06									LPC(18:1e)+H	LPC(18:1e)+H	LPC	C26 H55 O6 N1 P1	508.376	B	508.375	-1.51	314.47	508.376	-0.26	314.4	3	3	9.93336	3.67593	1.22518e+07	1.21701e+06		3	3	0.0650356	3.23569	1.09269e+07	7106.34		3	3	12.9526	12.2081	1.28797e+07	1.66825e+06		3	3	18.4154	5.10673
12702	M520T313	520.339	312.666	3.50087e+08									LPC(18:2)+H	LPC(18:2)+H	LPC	C26 H51 O7 N1 P1	520.34	B	520.339	-1.35	312.666	520.34	0.02	311.949	3	3	6.22036	5.45593	4.84291e+08	3.01247e+07		3	3	7.57216	14.6417	4.36e+08	3.30146e+07		3	3	2.95029	13.2649	4.83012e+08	1.42502e+07		3	3	15.8864	2.09095
12504	M506T304	506.36	304.458	1.67683e+06									LPC(18:2e)+H	LPC(18:2e)+H	LPC	C26 H53 O6 N1 P1	506.361	B	506.36	-0.09	304.458	506.361	0.09	304.26	3	3	6.84276	8.04383	1.97987e+06	135478		3	3	6.53358	3.80394	1.80644e+06	118025		3	3	12.2125	0.946989	1.99231e+06	243311		3	3	16.6021	13.3168
12966	M538T310	538.386	310.139	1.15366e+06									LPC(19:0)+H	LPC(19:0)+H	LPC	C27 H57 O7 N1 P1	538.387	B	538.386	-1.14	310.139	538.387	-0.02	309.9	3	3	10.108	6.56716	1.22951e+06	124279		3	3	5.79535	6.41923	1.15208e+06	66766.9		3	3	6.92047	5.03865	1.2679e+06	87744.9		3	3	46.421	13.1217
13132	M550T310	550.386	309.537	3.41283e+06									LPC(20:1)+H	LPC(20:1)+H	LPC	C28 H57 O7 N1 P1	550.387	B	550.386	-0.68	309.537	550.387	-0.05	309.18	3	3	14.1451	11.7069	4.19225e+06	592998		3	3	6.19087	1.07231	3.89089e+06	240880		3	3	5.97501	0.524195	4.40587e+06	263251		3	3	25.9685	3.09661
13385	M570T310	570.355	309.709	8.5478e+06									LPC(22:5)+H	LPC(22:5)+H	LPC	C30 H53 O7 N1 P1	570.355	B	570.355	-0.39	309.709	570.355	-0.13	309.57	3	3	12.6533	10.8548	1.05113e+07	1.33003e+06		3	3	3.5375	3.01575	1.0011e+07	354139		3	3	7.20493	3.08645	1.10668e+07	797359		3	3	49.5159	11.2159
13988	M614T346	614.33	345.512	123049									LPI(18:2)+NH4	LPI(18:2)+NH4	LPI	C27 H53 O12 N1 P1	614.33	B	614.33	-0.72	345.512	614.33	0.11	345.3	3	3	3.43974	3.51509	127874	4398.52		3	3	6.78813	7.04331	133811	9083.3		3	3	6.75516	2.17779	138579	9361.26		3	3	5.90682	7.16018
14520	M679T272	678.507	272.253	341166									PC(28:0)+H	PC(28:0)+H	PC	C36 H73 O8 N1 P1	678.507	C	678.507	-0.39	272.253	678.507	0.35	271.89	3	3	8.31327	0.892823	351738	29240.9		3	3	10.2725	3.05662	258476	26551.9		3	3	16.471	5.32121	295138	48612.1		0	0	NaN	NaN
14749	M707T271	706.538	270.56	2.85136e+06									PC(30:0)+H	PC(30:0)+H	PC	C38 H77 O8 N1 P1	706.538	C	706.538	-0.02	270.56	706.538	0.05	270.03	3	3	8.59865	1.75784	3.43571e+06	295425		3	3	12.0628	2.74643	2.38978e+06	288274		3	3	16.8651	2.61914	3.29682e+06	556012		0	0	NaN	NaN
14730	M705T270	704.522	269.864	1.0301e+06									PC(30:1)+H	PC(30:1)+H	PC	C38 H75 O8 N1 P1	704.522	C	704.522	-0.16	269.864	704.522	-0.03	269.4	3	3	5.70122	2.65169	1.0078e+06	57457		3	3	6.07863	2.72201	792867	48195.4		3	3	9.82194	1.64364	959289	94220.8		0	0	NaN	NaN
14877	M721T270	720.554	269.773	578665									PC(31:0)+H	PC(31:0)+H	PC	C39 H79 O8 N1 P1	720.554	C	720.554	-0.28	269.773	720.554	-0.33	269.4	3	3	9.23988	5.00322	571359	52792.9		3	3	8.87643	3.9552	419068	37198.3		3	3	15.2225	3.16736	550946	83867.8		0	0	NaN	NaN
14977	M733T268	732.554	268.32	2.43543e+07									PC(32:1)+H	PC(32:1)+H	PC	C40 H79 O8 N1 P1	732.554	C	732.554	0.23	268.32	732.554	-0.31	268.02	3	3	9.61154	3.85701	2.59826e+07	2.49733e+06		3	3	8.98218	5.17341	2.1115e+07	1.89659e+06		3	3	12.278	2.69618	2.45208e+07	3.01066e+06		0	0	NaN	NaN
14956	M731T269	730.538	268.517	1.26936e+07									PC(32:2)+H	PC(32:2)+H	PC	C40 H77 O8 N1 P1	730.538	C	730.538	0.35	268.517	730.538	0.05	268.2	3	3	8.93807	7.89787	1.31401e+07	1.17447e+06		3	3	6.64245	3.83099	1.12463e+07	747030		3	3	10.5102	2.84476	1.27587e+07	1.34096e+06		0	0	NaN	NaN
15046	M745T268	744.554	267.657	6.0691e+06									PC(33:2)+H	PC(33:2)+H	PC	C41 H79 O8 N1 P1	744.554	C	744.554	0.07	267.657	744.554	0.28	267.45	3	3	8.73011	5.47484	6.48535e+06	566178		3	3	9.59007	9.70194	5.65087e+06	541922		3	3	9.10707	4.32213	6.25489e+06	569637		2	0	42.9007	NaN
15170	M759T267_1	758.569	266.623	795741912									PC(34:2)+H	PC(34:2)+H	PC	C42 H81 O8 N1 P1	758.569	C	758.569	-1.05	266.623	758.569	-0.01	266.28	3	3	10.0583	4.95102	9.07168e+08	9.12461e+07		3	3	9.65085	9.35511	7.64071e+08	7.37393e+07		3	3	7.00382	1.49417	8.6466e+08	6.05592e+07		3	3	30.7687	4.14658
15444	M797T268	796.524	267.775	471331									PC(34:2)+K	PC(34:2)+K	PC	C42 H80 O8 N1 P1 K1	796.525	C	796.524	-1.83	267.775	796.525	-0.12	267.54	3	3	2.0247	5.90492	525247	10634.7		3	3	1.43036	3.42673	668847	9566.92		3	3	2.93129	10.3188	542837	15912.1		0	0	NaN	NaN
15156	M757T267	756.554	266.562	3.56853e+07									PC(34:3)+H	PC(34:3)+H	PC	C42 H79 O8 N1 P1	756.554	C	756.554	-0.19	266.562	756.554	0.12	266.37	3	3	9.33991	4.24059	4.04427e+07	3.77731e+06		3	3	5.33394	8.88845	3.68568e+07	1.96592e+06		3	3	5.39916	5.30973	3.91729e+07	2.11501e+06		3	3	39.4739	15.6559
15034	M743T263	742.575	263.167	1.19839e+07									PC(34:3e)+H	PC(34:3e)+H	PC	C42 H81 O7 N1 P1	742.575	C	742.575	0	263.167	742.575	0.11	263.01	3	3	7.13602	2.77131	1.43595e+07	1.0247e+06		3	3	11.2785	7.87044	1.22887e+07	1.38598e+06		3	3	3.65212	9.39089	1.35816e+07	496017		2	1	1.35392	NaN
15142	M755T264	754.539	263.803	4.42873e+06									PC(34:4)+H	PC(34:4)+H	PC	C42 H77 O8 N1 P1	754.538	C	754.539	0.72	263.803	754.538	-0.12	263.61	3	3	5.80695	3.56244	5.40419e+06	313819		3	3	10.379	5.00856	5.0009e+06	519045		3	3	4.97371	9.92913	5.43043e+06	270094		0	0	NaN	NaN
15377	M787T265	786.599	264.801	2.03738e+08									PC(36:2)+H	PC(36:2)+H	PC	C44 H85 O8 N1 P1	786.601	C	786.599	-2.51	264.801	786.601	-0.13	264.21	3	3	6.15108	3.69857	2.73146e+08	1.68014e+07		3	3	10.0881	5.33415	2.14819e+08	2.16711e+07		3	3	3.04863	6.75779	2.56292e+08	7.81338e+06		3	3	27.3957	1.21537
15366	M785T264	784.583	264.372	2.8969e+08									PC(36:3)+H	PC(36:3)+H	PC	C44 H83 O8 N1 P1	784.585	C	784.583	-2.38	264.372	784.585	-0.17	263.94	3	3	6.69554	2.16363	3.36834e+08	2.25529e+07		3	3	17.6699	10.5189	2.95242e+08	5.21689e+07		3	3	5.96746	5.2913	3.45814e+08	2.06363e+07		3	3	28.2987	1.38634
15358	M783T262	782.569	262.134	5.71285e+08									PC(36:4)+H	PC(36:4)+H	PC	C44 H81 O8 N1 P1	782.569	C	782.569	-1.04	262.134	782.567	-2.84	261.45	3	3	9.08332	0.941206	6.4806e+08	5.88653e+07		3	3	11.5225	6.82859	5.70529e+08	6.57393e+07		3	3	3.73838	5.8669	6.19096e+08	2.31442e+07		3	3	28.5155	2.32629
15242	M769T262	768.59	262.123	3.18815e+07									PC(36:4e)+H	PC(36:4e)+H	PC	C44 H83 O7 N1 P1	768.59	C	768.59	-0.44	262.123	768.59	0.24	261.51	3	3	11.1191	2.39895	3.53604e+07	3.93174e+06		3	3	9.3909	4.87804	3.03875e+07	2.85366e+06		3	3	5.04642	10.3607	3.41512e+07	1.72342e+06		3	3	25.1951	12.8933
15348	M781T262	780.554	262.476	4.57274e+07									PC(36:5)+H	PC(36:5)+H	PC	C44 H79 O8 N1 P1	780.554	C	780.554	-0.2	262.476	780.554	-0.02	262.29	3	3	7.07826	0.397322	5.48064e+07	3.87934e+06		3	3	11.1886	7.68029	5.09046e+07	5.69551e+06		3	3	2.66291	7.53557	5.35437e+07	1.42582e+06		3	1	66.5518	NaN
15228	M767T259	766.574	258.601	3.5725e+07									PC(36:5e)+H	PC(36:5e)+H	PC	C44 H81 O7 N1 P1	766.575	C	766.574	-0.47	258.601	766.575	0.25	258.33	3	3	8.03433	6.68173	4.89996e+07	3.93679e+06		3	3	6.87612	3.65346	3.63872e+07	2.50203e+06		3	3	6.98297	3.65869	4.41255e+07	3.08127e+06		2	2	3.41215	21.6252
15216	M765T259	764.559	258.936	2.59312e+06									PC(36:6e)+H	PC(36:6e)+H	PC	C44 H79 O7 N1 P1	764.559	C	764.559	-0.06	258.936	764.559	0.23	258.9	3	3	9.42003	7.14277	3.2387e+06	305086		3	3	6.4713	3.87555	2.60094e+06	168314		3	3	6.42517	2.81853	3.01414e+06	193664		0	0	NaN	NaN
15349	M781T258	780.59	257.992	2.19268e+06									PC(37:5e)+H	PC(37:5e)+H	PC	C45 H83 O7 N1 P1	780.59	C	780.59	-0.58	257.992	780.59	0.07	257.73	3	3	8.25653	6.59021	2.91096e+06	240344		3	3	6.45102	3.85386	2.07955e+06	134152		3	3	8.89434	2.14963	2.58062e+06	229529		0	0	NaN	NaN
15534	M811T260	810.599	260.41	2.10458e+08									PC(38:4)+H	PC(38:4)+H	PC	C46 H85 O8 N1 P1	810.601	C	810.599	-2.07	260.41	810.6	-0.32	259.65	3	3	11.5551	0.995092	2.67693e+08	3.09323e+07		3	3	6.38692	1.64238	2.08366e+08	1.33082e+07		3	3	6.87027	2.71968	2.47679e+08	1.70163e+07		3	3	27.5517	2.88103
15438	M795T260	794.605	259.903	3.39549e+07									PC(38:5e)+H	PC(38:5e)+H	PC	C46 H85 O7 N1 P1	794.606	C	794.605	-0.97	259.903	794.606	0.04	259.32	3	3	8.61357	2.90004	4.25318e+07	3.6635e+06		3	3	6.37318	2.69136	3.33588e+07	2.12602e+06		3	3	4.92684	3.83312	4.02378e+07	1.98245e+06		3	3	42.3807	5.85099
15519	M807T261	806.568	260.83	1.23635e+08									PC(38:6)+H	PC(38:6)+H	PC	C46 H81 O8 N1 P1	806.569	C	806.568	-1.28	260.83	806.567	-2.72	260.43	3	3	8.8214	1.47335	1.72658e+08	1.52308e+07		3	3	6.84815	1.28567	1.49073e+08	1.02087e+07		3	3	8.38535	5.88751	1.68305e+08	1.4113e+07		3	3	30.2226	5.20278
15420	M793T258	792.589	257.662	1.50414e+07									PC(38:6e)+H	PC(38:6e)+H	PC	C46 H83 O7 N1 P1	792.59	C	792.589	-0.95	257.662	792.59	0.18	258.45	3	3	8.36351	3.01788	2.04179e+07	1.70765e+06		3	3	7.46129	2.80308	1.57159e+07	1.17261e+06		3	3	9.50393	3.13319	1.88784e+07	1.79419e+06		0	0	NaN	NaN
15504	M805T262	804.552	261.638	4.38189e+06									PC(38:7)+H	PC(38:7)+H	PC	C46 H79 O8 N1 P1	804.554	C	804.552	-2.03	261.638	804.554	-0.18	260.91	3	3	7.97175	1.69264	5.99794e+06	478141		3	3	7.13656	4.85582	6.04138e+06	431147		3	3	4.04214	5.73738	5.85366e+06	236613		2	0	4.18453	NaN
15399	M791T257	790.574	257.372	4.3055e+06									PC(38:7e)+H	PC(38:7e)+H	PC	C46 H81 O7 N1 P1	790.575	C	790.574	-0.7	257.372	790.575	0.17	257.28	3	3	5.31671	6.67433	6.15885e+06	327448		3	3	7.85197	0.944135	4.52606e+06	355385		3	3	9.57116	1.21337	5.56149e+06	532299		0	0	NaN	NaN
15673	M837T260	836.613	260.171	1.68068e+07									PC(40:5)+H	PC(40:5)+H	PC	C48 H87 O8 N1 P1	836.616	C	836.613	-3.83	260.171	836.616	-0.37	259.65	3	3	8.65219	1.33013	2.36916e+07	2.04984e+06		3	3	7.63815	1.52798	1.775e+07	1.35577e+06		3	3	9.51143	3.65797	2.16045e+07	2.0549e+06		3	1	50.8281	NaN
15658	M835T259	834.599	259.266	3.04302e+07									PC(40:6)+H	PC(40:6)+H	PC	C48 H85 O8 N1 P1	834.601	C	834.599	-1.67	259.266	834.601	-0.09	258.96	3	3	10.0621	5.17011	4.60693e+07	4.63555e+06		3	3	5.0765	4.52317	3.42727e+07	1.73985e+06		3	3	7.52795	1.91908	4.17127e+07	3.14011e+06		3	3	21.6893	21.7207
15590	M821T259	820.62	259.375	4.6811e+06									PC(40:6e)+H	PC(40:6e)+H	PC	C48 H87 O7 N1 P1	820.621	C	820.62	-1.72	259.375	820.622	0.11	259.02	3	3	6.73928	1.30654	5.64486e+06	380423		3	3	6.58729	4.80876	4.24307e+06	279504		3	3	5.44718	1.41383	5.2082e+06	283700		0	0	NaN	NaN
15640	M831T258	830.568	257.879	5.40031e+06									PC(40:8)+H	PC(40:8)+H	PC	C48 H81 O8 N1 P1	830.569	C	830.568	-1.21	257.879	830.569	-0.06	258.24	3	3	4.12769	4.64432	6.92101e+06	285678		3	3	7.37959	3.93096	5.74062e+06	423634		3	3	8.11224	2.06407	6.49346e+06	526765		0	0	NaN	NaN
15563	M817T256	816.589	255.794	1.18714e+06									PC(40:8e)+H	PC(40:8e)+H	PC	C48 H83 O7 N1 P1	816.59	C	816.589	-1.66	255.794	816.59	0.15	255.45	3	3	2.05862	5.18468	1.69598e+06	34913.6		3	3	3.52652	0.508698	1.29479e+06	45661.1		3	3	9.03476	2.20217	1.5145e+06	136831		0	0	NaN	NaN
15757	M855T255	854.568	255.315	778082									PC(42:10)+H	PC(42:10)+H	PC	C50 H81 O8 N1 P1	854.569	C	854.568	-1.98	255.315	854.57	0.08	254.85	3	3	4.68137	3.77422	1.19845e+06	56103.8		3	3	7.79991	7.82149	959424	74834.2		3	3	10.034	0.693105	1.09295e+06	109667		0	0	NaN	NaN
15722	M849T259	848.652	258.559	895913									PC(42:6e)+H	PC(42:6e)+H	PC	C50 H91 O7 N1 P1	848.653	C	848.652	-1.07	258.559	848.653	-0.27	258.57	3	3	12.7905	5.27074	1.28664e+06	164568		3	3	7.43559	3.60745	874307	65009.9		3	3	4.553	4.68654	1.08758e+06	49517.5		0	0	NaN	NaN
15785	M859T257	858.599	257.045	763305									PC(42:8)+H	PC(42:8)+H	PC	C50 H85 O8 N1 P1	858.601	C	858.599	-2.55	257.045	858.601	-0.21	256.83	3	3	4.38728	3.50924	1.14482e+06	50226.5		3	3	11.9288	5.15174	845716	100884		3	3	7.27946	1.43465	1.02352e+06	74506.7		1	1	NaN	NaN
15019	M741T212	740.522	211.848	2.04181e+06									PE(16:0_20:4)+H	PE(36:4)+H	PE	C41 H75 O8 N1 P1	740.522	B	740.522	-0.65	211.848	740.523	0.06	211.59	3	3	4.91149	9.16886	1.83021e+06	89890.6		2	3	7.4324	8.188	1.3808e+06	102626		2	2	5.36225	9.80124	1.61202e+06	86440.5		0	0	NaN	NaN
14674	M701T199	700.527	198.679	363233									PE(16:0p_18:2)+H	PE(34:2p)+H	PE	C39 H75 O7 N1 P1	700.528	A	700.527	-1.17	198.679	700.528	0.03	197.04	0	0	NaN	NaN	NaN	NaN		0	0	NaN	NaN	NaN	NaN		0	0	NaN	NaN	NaN	NaN		0	0	NaN	NaN
14917	M725T181	724.527	181.226	2.25637e+06									PE(16:0p_20:4)+H	PE(36:4p)+H	PE	C41 H75 O7 N1 P1	724.528	A	724.527	-0.81	181.226	724.528	0.06	180.27	0	0	NaN	NaN	NaN	NaN		0	0	NaN	NaN	NaN	NaN		0	0	NaN	NaN	NaN	NaN		0	0	NaN	NaN
15081	M749T196	748.527	196.171	2.85202e+06									PE(16:0p_22:6)+H	PE(38:6p)+H	PE	C43 H75 O7 N1 P1	748.528	A	748.527	-1.13	196.171	748.528	0.34	195.69	2	3	5.22291	0.874129	1.97515e+06	103161		2	3	9.50754	7.30398	1.59798e+06	151928		1	1	NaN	NaN	1.70077e+06	NaN		0	0	NaN	NaN
15239	M769T208	768.553	207.921	2.73596e+06									PE(18:0_20:4)+H	PE(38:4)+H	PE	C43 H79 O8 N1 P1	768.554	B	768.553	-1.2	207.921	768.554	-0.1	207.78	3	2	12.7086	2.13744	2.71079e+06	344503		1	1	NaN	NaN	2.09408e+06	NaN		3	2	29.3006	5.10702	2.15808e+06	632329		0	0	NaN	NaN
15240	M769T193	768.553	192.894	1.23706e+06									PE(18:0_20:4)+H	PE(38:4)+H	PE	C43 H79 O8 N1 P1	768.554	B	768.553	-1.37	192.894	768.554	-0.03	191.01	0	0	NaN	NaN	NaN	NaN		0	0	NaN	NaN	NaN	NaN		0	0	NaN	NaN	NaN	NaN		0	0	NaN	NaN
12170	M482T299	482.324	299.227	4.25048e+06									PE(18:0e)+H	PE(18:0e)+H	PE	C23 H49 O7 N1 P1	482.324	C	482.324	0.23	299.227	482.324	0.01	299.13	3	3	13.0496	7.5326	4.5216e+06	590052		3	2	11.6046	3.96676	3.99546e+06	463657		3	3	7.11979	6.87605	4.60072e+06	327561		2	2	22.0592	0.774887
15215	M765T195	764.521	195.372	1.77412e+06									PE(18:1_20:5)+H	PE(38:6)+H	PE	C43 H75 O8 N1 P1	764.522	B	764.521	-1.4	195.372	764.523	0.06	193.98	0	0	NaN	NaN	NaN	NaN		0	0	NaN	NaN	NaN	NaN		0	0	NaN	NaN	NaN	NaN		0	0	NaN	NaN
15097	M751T194	750.542	193.769	5.49547e+06									PE(18:1p_20:4)+H	PE(38:5p)+H	PE	C43 H77 O7 N1 P1	750.543	A	750.542	-1.12	193.769	750.543	0.03	192.72	1	1	NaN	NaN	5.11453e+06	NaN		3	3	8.91852	8.50045	3.9223e+06	349811		2	3	2.46368	11.3254	5.41336e+06	133368		0	0	NaN	NaN
15098	M751T174	750.542	174.18	2.96428e+06									PE(18:1p_20:4)+H	PE(38:5p)+H	PE	C43 H77 O7 N1 P1	750.543	B	750.542	-1.85	174.18	750.543	0.01	172.86	0	0	NaN	NaN	NaN	NaN		0	0	NaN	NaN	NaN	NaN		0	0	NaN	NaN	NaN	NaN		0	0	NaN	NaN
12110	M478T292	478.293	291.97	640138									PE(18:2e)+H	PE(18:2e)+H	PE	C23 H45 O7 N1 P1	478.293	C	478.293	0.02	291.97	478.293	0.07	291.84	3	1	17.461	NaN	676894	118192		3	3	6.56733	10.4273	580022	38092		2	2	1.66871	3.10429	625940	10445.1		0	0	NaN	NaN
12784	M526T296	526.293	296.174	2.10485e+06									PE(20:3e)+Na	PE(20:3e)+Na	PE	C25 H46 O7 N1 P1 Na1	526.29	C	526.293	4.28	296.174	526.291	0.37	295.83	3	3	10.8166	15.7804	3.06024e+06	331013		3	3	3.42263	11.9295	2.73367e+06	93563.4		3	3	8.83537	3.12712	2.92815e+06	258713		3	3	7.03921	11.793
12444	M502T297	502.293	297.167	5.78262e+06									PE(20:4e)+H	PE(20:4e)+H	PE	C25 H45 O7 N1 P1	502.293	C	502.293	-0.29	297.167	502.293	0.04	296.91	3	3	6.55157	13.9639	7.59417e+06	497538		3	3	1.88536	9.52006	6.95741e+06	131172		3	3	5.68877	4.3212	7.25221e+06	412562		3	3	7.50779	12.3911
14832	M717T221	716.522	221.265	1.45068e+06									PE(34:2)+H	PE(34:2)+H	PE	C39 H75 O8 N1 P1	716.522	C	716.522	-0.85	221.265	716.522	-0.09	221.4	2	2	6.52918	3.38538	966550	63107.8		3	3	31.5269	45.1503	1.13251e+06	357046		3	3	14.4803	7.29054	843071	122080		0	0	NaN	NaN
14834	M717T212	716.522	212.187	536373									PE(34:2)+H	PE(34:2)+H	PE	C39 H75 O8 N1 P1	716.522	C	716.522	-1.09	212.187	716.522	-0.06	210.48	0	0	NaN	NaN	NaN	NaN		0	0	NaN	NaN	NaN	NaN		0	0	NaN	NaN	NaN	NaN		0	0	NaN	NaN
15214	M765T210	764.522	209.538	2.36192e+06									PE(38:6)+H	PE(38:6)+H	PE	C43 H75 O8 N1 P1	764.522	C	764.522	-1.13	209.538	764.523	0.04	209.25	2	1	18.1163	NaN	2.05329e+06	371980		1	2	NaN	1.31977	1.52129e+06	NaN		2	2	3.50119	2.79262	1.76554e+06	61814.7		0	0	NaN	NaN
14319	M648T303	647.512	303.129	632728									SM(d30:1)+H	SM(d30:1)+H	SM	C35 H72 O6 N2 P1	647.512	C	647.512	-0.45	303.129	647.512	0.02	302.73	3	3	8.46087	3.60721	530937	44921.9		3	3	13.4479	5.48797	435015	58500.4		3	3	12.3671	2.71369	570030	70496.4		2	2	0.281947	43.0315
14497	M676T301	675.543	301.489	8.8352e+06									SM(d32:1)+H	SM(d32:1)+H	SM	C37 H76 O6 N2 P1	675.544	C	675.543	-0.39	301.489	675.544	0.1	301.08	3	3	12.2226	13.5503	7.40086e+06	904579		3	3	19.8526	4.05144	5.71087e+06	1.13375e+06		3	3	16.1513	7.33695	7.48724e+06	1.20929e+06		3	3	36.6212	2.26628
14480	M674T302	673.528	301.721	1.56269e+06									SM(d32:2)+H	SM(d32:2)+H	SM	C37 H74 O6 N2 P1	673.528	C	673.528	0.03	301.721	673.528	0.08	301.44	3	3	9.60499	12.3431	1.66216e+06	159650		3	3	16.9796	2.84108	1.33191e+06	226152		3	3	12.4189	6.36431	1.62037e+06	201233		2	3	28.6299	31.4722
14613	M690T301	689.559	300.798	2.65035e+06									SM(d33:1)+H	SM(d33:1)+H	SM	C38 H78 O6 N2 P1	689.559	C	689.559	-0.07	300.798	689.559	0.22	300.36	3	3	15.6977	18.209	2.3874e+06	374768		3	3	18.6174	6.20588	1.86255e+06	346758		3	3	15.6092	9.59235	2.43146e+06	379530		3	3	40.7328	5.1712
14688	M702T300	701.559	300.175	2.54002e+07									SM(d34:2)+H	SM(d34:2)+H	SM	C39 H78 O6 N2 P1	701.559	C	701.559	-0.42	300.175	701.559	0.01	299.91	3	3	17.8468	17.1712	2.5e+07	4.46171e+06		3	3	16.6786	8.90023	1.81329e+07	3.02431e+06		3	3	12.482	9.74554	2.33462e+07	2.91407e+06		3	3	41.992	7.7362
14826	M716T299	715.574	299.233	427797									SM(d35:2)+H	SM(d35:2)+H	SM	C40 H80 O6 N2 P1	715.575	C	715.574	-1.32	299.233	715.575	-0.15	299.13	3	3	19.7378	18.786	391727	77318.3		3	3	16.1193	11.4104	271784	43809.7		3	3	5.47543	11.6037	353804	19372.3		0	0	NaN	NaN
14950	M730T299	729.59	298.766	7.30797e+06									SM(d36:2)+H	SM(d36:2)+H	SM	C41 H82 O6 N2 P1	729.591	C	729.59	-0.87	298.766	729.59	-0.04	298.26	3	3	19.0163	17.3229	7.87993e+06	1.49847e+06		3	3	12.4085	13.6698	5.65171e+06	701290		3	3	4.73758	8.85457	7.26855e+06	344353		3	3	39.3847	28.7725
14937	M728T298	727.575	298.144	1.31783e+06									SM(d36:3)+H	SM(d36:3)+H	SM	C41 H80 O6 N2 P1	727.575	C	727.575	-0.48	298.144	727.575	0.03	297.78	3	3	19.8419	19.9477	1.42575e+06	282896		3	3	10.3403	13.9842	1.04213e+06	107759		3	3	4.27077	7.74043	1.25227e+06	53481.6		0	0	NaN	NaN
15371	M786T296	785.652	296.342	2.89191e+06									SM(d40:2)+H	SM(d40:2)+H	SM	C45 H90 O6 N2 P1	785.653	C	785.652	-1.22	296.342	785.653	-0.21	295.74	3	3	23.3431	24.62	3.03628e+06	708760		3	3	10.9267	19.2587	2.24228e+06	245007		3	3	8.5927	6.66681	2.76299e+06	237415		3	2	35.3516	38.5852
15539	M812T295	811.667	295.443	3.50861e+06									SM(d42:3)+H	SM(d42:3)+H	SM	C47 H92 O6 N2 P1	811.669	C	811.667	-1.59	295.443	811.669	-0.18	294.72	3	3	28.772	33.1995	3.81965e+06	1.09899e+06		3	3	13.1456	24.9401	2.66058e+06	349748		3	3	14.5982	9.02114	3.32485e+06	485367		2	3	30.1115	22.6723
15531	M810T295	809.652	295.459	980188									SM(d42:4)+H	SM(d42:4)+H	SM	C47 H90 O6 N2 P1	809.653	C	809.652	-1.37	295.459	809.653	-0.09	295.11	3	3	30.4028	33.0137	1.00082e+06	304278		3	3	11.7843	26.1968	666181	78505		3	3	15.2368	9.16851	860127	131056		0	0	NaN	NaN
3248	M195T33	195.088	33.1752	5.30125e+06	3248	Caffeine	C8H10N4O2	31.62	195.088	[M+H]+1	1	92													3	3	2.07571	1.82206	9.48438e+06	196868		3	3	3.28712	3.0543	1.01574e+07	333885		3	3	3.5635	4.9537	1.01274e+07	360889		3	3	8.48627	7.45781
359	M104T292_2	104.107	292.376	3.56259e+08	359	Choline	C5H13NO	292.32	104.107	[M+H]+1	1	79.7													3	3	8.3852	14.9171	3.73209e+08	3.12943e+07		3	3	3.10271	11.1794	3.5715e+08	1.10813e+07		3	3	6.82995	1.42726	3.78571e+08	2.58562e+07		3	3	1.39794	9.06488
949	M132T432_2	132.066	431.709	2.97092e+07	949	Hydroxy-D-proline	C5H9NO3	431.46	132.066	[M+H]+1	1	84.8													3	3	4.65657	6.37308	2.08706e+07	971854		3	3	4.64495	4.81909	1.83705e+07	853302		3	3	12.7833	3.69074	2.25944e+07	2.88831e+06		3	3	5.52579	1.29518
491	M112T225	112.051	225.478	3.94712e+06	491	Cytosine	C4H5N3O	225.36	112.051	[M+H]+1	1	81.4													3	3	5.61955	0.210828	3.83772e+06	215662		3	3	5.88177	2.87895	3.79966e+06	223487		3	3	2.56472	0.407431	4.12879e+06	105892		3	3	1.4345	3.10029
3603	M205T333_2	205.097	333.345	1.50221e+08	3603	DL-Tryptophan	C11H12N2O2	333.06	205.097	[M+H]+1	1	86													3	3	5.35508	1.30446	1.57058e+08	8.41059e+06		3	3	7.45283	4.54524	1.49539e+08	1.11449e+07		3	3	2.86054	2.70037	1.67788e+08	4.79964e+06		3	3	3.69931	1.28271
1132	M137T128	137.046	128.43	136173996	1132	Hypoxanthine	C5H4N4O	127.56	137.046	[M+H]+1	1	90.9													3	3	4.63928	8.40915	1.35708e+08	6.29588e+06		3	3	4.55417	2.50255	1.34997e+08	6.14801e+06		3	3	4.28887	2.64541	1.42762e+08	6.12288e+06		3	3	2.26348	3.32358
967	M132T357_2	132.102	357.193	1.69456e+08	967	L-Isoleucine or L-leucine	C6H13NO2	357	132.102	[M+H]+1	1	75													3	3	2.78251	5.89125	1.78794e+08	4.97495e+06		3	3	3.28523	1.01661	1.62663e+08	5.34385e+06		3	3	1.40593	5.10513	1.75871e+08	2.47262e+06		3	3	4.03962	7.24449
3741	M209T338	209.092	338.004	8.04085e+06	3741	L-Kynurenine	C10H12N2O3	336.06	209.092	[M+H]+1	1	78.7													3	3	5.87521	3.69643	8.02888e+06	471713		3	3	2.49302	1.19802	7.73639e+06	192870		3	3	9.6605	0.933997	8.86458e+06	856363		3	3	1.30979	4.71373
665	M120T439	120.065	438.728	2.40129e+07	665	Threonine	C4H9NO3	438.54	120.065	[M+H]+1	1	91.2													3	3	4.14364	2.36898	2.18093e+07	903696		3	3	1.52778	7.02724	1.89698e+07	289817		3	3	7.62106	6.2215	2.06153e+07	1.5711e+06		3	3	5.44516	1.22461
[truncated: 68 more columns]

## Sheet: PLASMA_HILIC_NEG
TABLE S1D: PLASMA UHPLC-MS HILIC NEGATIVE ION ASSAY: COMPOUNDS IDENTIFIED USING MS/MS DATABASE MATCHES
INITIAL FILTERING - peaks retained:
- where present in <70% QC samples; - where QC RSD<30%, - where blank filter >5%
- XCMS minfrac =0.2
- peaks with a putative ID
- the highest peak intensity ionform for each putative ID
MS/MS Identification
- QC MS/MS files were submitted to both Thermo Fisher Compound Discoverer and Thermo Fisher Lipid Search to annotate polar and lipid compounds based on MS/MS spectral matches to databases.																									100% ACN; 60 min, -20oC incubation							100% ACN; no incubation							100% ACN; 60 min, 4oC incubation							CHCl3; 1 min partition
					COMPOUND DISCOVERER MS/MS ID								LIPID SEARCH ID												Sample prep replicates	UHPLC-MS injection replicates	Sample prep replicates	UHPLC-MS injection replicates	Sample prep replicates	Sample prep replicates		Sample prep replicates	UHPLC-MS injection replicates	Sample prep replicates	UHPLC-MS injection replicates	Sample prep replicates	Sample prep replicates		Sample prep replicates	UHPLC-MS injection replicates	Sample prep replicates	UHPLC-MS injection replicates	Sample prep replicates	Sample prep replicates		Sample prep replicates	UHPLC-MS injection replicates	Sample prep replicates	UHPLC-MS injection replicates
IDX	MZ	name	RT	MPA	XCMS_index	Compound	Formula	RT	mz	Ion	Charge	mzcloud_score	LipidIon	LipidGroup	Class	IonFormula	theor_mass	Grade	XCMS_mz	XCMS_mz_ppm	XCMS_rt	lipidsearch_mz	lipidsearch_mz_ppm	lipidsearch_rt	# reps a peak is present in	# reps a peak is present in	RSD (%)	RSD (%)	Mean	Standard deviation		# reps a peak is present in	# reps a peak is present in	RSD (%)	RSD (%)	Mean	Standard deviation		# reps a peak is present in	# reps a peak is present in	RSD (%)	RSD (%)	Mean	Standard deviation		# reps a peak is present in	# reps a peak is present in	RSD (%)	RSD (%)
8069	409.236	M409T295	294.9	30495.4									LPA(16:0)-H	LPA(16:0)-H	LPA	C19 H38 O7 N0 P1	409.236	B	409.236	-0.24	294.9	409.237	1.16	294.84	3	3	1.78899	17.1659	13752.5	246.032		2	2	25.1197	12.7937	11713.3	2942.33		2	2	15.3665	5.56113	18835.9	2894.41		1	3	NaN	4.06624
8490	457.236	M457T287	286.593	44682									LPA(20:4)-H	LPA(20:4)-H	LPA	C23 H38 O7 N0 P1	457.236	A	457.236	0.22	286.593	457.238	3.79	282.36	3	3	12.7061	11.4243	126270	16044.1		3	3	6.37836	3.42906	161049	10272.3		3	3	13.6958	11.4388	151205	20708.7		3	3	6.82365	7.9059
8859	540.33	M540T314	313.597	4.11841e+06									LPC(16:0)+HCOO	LPC(16:0)+HCOO	LPC	C25 H51 O9 N1 P1	540.331	A	540.33	-0.43	313.597	540.331	1.38	312.908	3	3	5.88612	10.5512	4.92513e+06	289899		3	3	3.15253	1.22486	6.22895e+06	196370		3	3	5.2722	2.02892	5.79568e+06	305560		3	3	14.0794	2.41306
8950	566.347	M566T312	311.574	721882									LPC(18:1)+HCOO	LPC(18:1)+HCOO	LPC	C27 H53 O9 N1 P1	566.346	A	566.347	0.47	311.574	566.347	1.64	310.957	3	3	4.95249	1.71269	883644	43762.4		3	3	3.31101	4.85128	1.09072e+06	36113.8		3	3	4.26635	8.41652	1.13613e+06	48471.4		3	3	20.978	4.89857
8946	564.331	M564T313	312.594	1.09977e+06									LPC(18:2)+HCOO	LPC(18:2)+HCOO	LPC	C27 H51 O9 N1 P1	564.331	A	564.331	0.09	312.594	564.332	1.61	312.63	3	3	4.29324	3.25466	1.29043e+06	55401.1		3	3	8.42609	6.83879	1.72297e+06	145179		3	3	12.3945	7.19105	1.64453e+06	203832		3	3	11.5791	4.59022
9414	776.546	M777T269	268.562	80298									PC(16:0_16:1)+HCOO	PC(32:1)+HCOO	PC	C41 H79 O10 N1 P1	776.545	A	776.546	1.53	268.562	776.547	3.17	268.2	3	3	7.93272	4.02561	73719	5847.93		3	3	2.3362	6.0239	72059.8	1683.46		3	3	7.02455	5.63067	76098.7	5345.59		0	0	NaN	NaN
9494	802.561	M803T267	266.881	2.50442e+06									PC(16:0_18:2)+HCOO	PC(34:2)+HCOO	PC	C43 H81 O10 N1 P1	802.56	A	802.561	1.27	266.881	802.563	2.82	266.851	3	3	3.26336	2.67684	2.55205e+06	83282.5		3	3	6.693	1.84128	2.59089e+06	173408		3	3	10.3208	9.38804	2.7747e+06	286370		3	3	38.7349	23.5033
9547	826.561	M827T262	262.378	1.9282e+06									PC(16:0_20:4)+HCOO	PC(36:4)+HCOO	PC	C45 H81 O10 N1 P1	826.56	A	826.561	1.31	262.378	826.562	1.8	261.63	3	3	8.86879	3.65816	2.09223e+06	185556		3	3	9.61565	4.40525	2.14128e+06	205898		3	3	5.60161	3.36776	2.26337e+06	126785		2	1	48.1643	NaN
9543	824.546	M825T263	262.902	143028									PC(16:0_20:5)+HCOO	PC(36:5)+HCOO	PC	C45 H79 O10 N1 P1	824.545	B	824.546	1.44	262.902	824.547	3.22	262.62	3	3	12.3834	6.40861	176846	21899.5		3	3	5.1604	6.66995	182771	9431.7		3	3	5.20221	5.09357	186160	9684.46		0	0	NaN	NaN
9644	850.562	M851T261	261.137	477607									PC(16:0_22:6)+HCOO	PC(38:6)+HCOO	PC	C47 H81 O10 N1 P1	850.56	A	850.562	1.43	261.137	850.562	2.3	260.76	3	3	4.77831	0.763334	518210	24761.7		3	3	7.12791	4.02671	544488	38810.6		3	3	4.3541	0.936777	565108	24605.4		0	0	NaN	NaN
9509	810.567	M811T258	258.492	135091									PC(16:1e_20:4)+HCOO	PC(36:5e)+HCOO	PC	C45 H81 O9 N1 P1	810.565	B	810.567	1.63	258.492	810.567	2.33	258.21	3	3	7.83032	6.14831	135509	10610.8		3	3	4.47757	3.26988	132008	5910.75		3	3	6.78017	1.62823	149155	10113		0	0	NaN	NaN
9521	816.576	M817T266	265.79	31357.1									PC(17:0_18:2)+HCOO	PC(35:2)+HCOO	PC	C44 H83 O10 N1 P1	816.576	A	816.576	0.55	265.79	816.578	2.53	265.5	3	3	4.2329	7.26877	28986.3	1226.96		3	3	10.5081	10.4056	30846.8	3241.43		3	3	19.24	13.4545	31992.4	6155.32		0	0	NaN	NaN
9653	854.593	M855T260	260.432	783814									PC(18:0_20:4)+HCOO	PC(38:4)+HCOO	PC	C47 H85 O10 N1 P1	854.592	A	854.593	1.14	260.432	854.593	1.84	260.04	3	3	5.9657	0.26904	801727	47828.7		3	3	9.72618	4.3033	767216	74620.7		3	3	4.36344	0.653739	840584	36678.4		0	0	NaN	NaN
9650	852.576	M853T261	261.051	509230									PC(18:1_20:4)+HCOO	PC(38:5)+HCOO	PC	C47 H83 O10 N1 P1	852.576	A	852.576	0.55	261.051	852.578	1.76	260.1	3	3	5.87024	0.65407	519428	30491.7		3	3	8.24185	3.09665	517699	42668		3	3	5.12085	2.01071	558230	28586.1		0	0	NaN	NaN
9582	836.582	M837T257	257.217	61254.1									PC(18:2e_20:4)+HCOO	PC(38:6e)+HCOO	PC	C47 H83 O9 N1 P1	836.581	B	836.582	1.57	257.217	836.582	1.5	256.44	3	3	10.219	7.10013	67990.2	6947.93		3	3	4.31722	1.21869	65861.9	2843.41		3	3	11.1616	5.0078	74756	8343.95		0	0	NaN	NaN
9559	833.519	M834T306	305.534	37201.3									PI(16:0_18:2)-H	PI(34:2)-H	PI	C43 H78 O13 N0 P1	833.519	A	833.519	0.99	305.534	833.52	1.23	305.04	3	3	2.04826	9.58387	24924.2	510.511		3	3	27.7999	17.9064	17210.8	4784.57		3	3	30.8548	8.75414	25715.3	7934.42		0	0	NaN	NaN
9656	857.519	M858T302	301.654	50521.2									PI(16:0_20:4)-H	PI(36:4)-H	PI	C45 H78 O13 N0 P1	857.519	A	857.519	0.95	301.654	857.52	2.14	301.23	3	3	12.5418	24.8036	40312.3	5055.88		3	3	10.455	6.18235	37643.6	3935.65		3	3	21.5327	20.0907	42908.8	9239.43		0	0	NaN	NaN
9743	885.551	M886T300	300.075	314747									PI(18:0_20:4)-H	PI(38:4)-H	PI	C47 H82 O13 N0 P1	885.55	B	885.551	1.35	300.075	885.552	2.3	299.91	3	3	13.619	5.09098	277851	37840.5		3	3	11.7124	6.87863	250434	29331.8		3	3	5.71674	2.02575	311954	17833.6		3	3	16.4228	16.5042
9097	619.289	M619T343	342.776	37817.3									PI(20:4e)-H	PI(20:4e)-H	PI	C29 H48 O12 N0 P1	619.289	C	619.289	0.63	342.776	619.29	2.31	342.63	3	3	16.5046	5.47558	55122.6	9097.78		3	3	5.65764	8.86661	69197.3	3914.94		3	3	3.49448	1.08396	63300.4	2212.02		3	3	4.30248	6.2229
9483	800.546	M801T267	266.817	105377									PS(37:2)-H	PS(37:2)-H	PS	C43 H79 O10 N1 P1	800.545	C	800.546	1.37	266.817	800.547	2.51	266.85	3	3	0.622845	3.43349	112650	701.633		3	3	5.89255	4.64545	119636	7049.63		3	3	9.01812	4.74012	119083	10739.1		0	0	NaN	NaN
9552	828.576	M829T264	264.315	985477									PS(39:2)-H	PS(39:2)-H	PS	C45 H83 O10 N1 P1	828.576	C	828.576	-0.31	264.315	828.577	0.62	264.15	3	3	7.48796	5.88596	1.04836e+06	78501		3	3	7.67876	3.05362	1.02208e+06	78483.2		3	3	8.57099	3.94029	1.0732e+06	91983.7		0	0	NaN	NaN
8998	583.256	M583T27	26.9728	286902	8998	Bilirubin	C33H36N4O6	26.7	583.256	[M-H]-1	-1	76.3													3	3	9.58804	12.5679	332130	31844.7		3	3	15.0114	7.8328	284815	42754.7		3	3	7.76558	0.459906	318044	24697.9		3	3	15.1544	1.84571
8532	464.301	M464T308	308.053	67301.8	8532	Glycocholic acid	C26H43NO6	307.68	464.302	[M-H]-1	-1	77.1													3	3	4.79426	2.24102	71959.1	3449.91		3	3	3.34975	15.2664	73716.1	2469.31		3	3	3.94246	8.51431	84340.2	3325.07		3	3	5.6174	4.39901
[truncated: 68 more columns]

## Sheet: URINE_C18_RP_POS
TABLE S1E: URINE UHPLC-MS C18 (aqueous) REVERSED PHASE ASSAY POSITIVE ION: COMPOUNDS IDENTIFIED USING MS/MS DATABASE MATCHES
INITIAL FILTERING - peaks retained:
- where present in <70% QC samples; - where QC RSD<30%, - where blank filter >5%
- XCMS minfrac =0.2
- peaks with a putative ID
- the highest peak intensity ionform for each putative ID
MS/MS Identification
- QC MS/MS files were submitted to both Thermo Fisher Compound Discoverer and Thermo Fisher Lipid Search to annotate polar and lipid compounds based on MS/MS spectral matches to databases.																									100% ACN; 60 min, -20oC incubation							100% ACN; no incubation							100% ACN; 60 min, 4oC incubation							ACN:H2O 50:50; 60 min, -20oC incubation
					COMPOUND DISCOVERER MS/MS ID								LIPID SEARCH ID												Sample prep replicates	UHPLC-MS injection replicates	Sample prep replicates	UHPLC-MS injection replicates	Sample prep replicates	Sample prep replicates		Sample prep replicates	UHPLC-MS injection replicates	Sample prep replicates	UHPLC-MS injection replicates	Sample prep replicates	Sample prep replicates		Sample prep replicates	UHPLC-MS injection replicates	Sample prep replicates	UHPLC-MS injection replicates	Sample prep replicates	Sample prep replicates		Sample prep replicates	UHPLC-MS injection replicates	Sample prep replicates	UHPLC-MS injection replicates
IDX	XCMS output name	MZ	RT	MPA	XCMS_index	Compound	Formula	RT	mz	Ion	Charge	mzcloud_score	LipidIon	LipidGroup	Class	IonFormula	theor_mass	Grade	XCMS_mz	XCMS_mz_ppm	XCMS_rt	lipidsearch_mz	lipidsearch_mz_ppm	lipidsearch_rt	# reps a peak is present in	# reps a peak is present in	RSD (%)	RSD (%)	Mean	Standard deviation		# reps a peak is present in	# reps a peak is present in	RSD (%)	RSD (%)	Mean	Standard deviation		# reps a peak is present in	# reps a peak is present in	RSD (%)	RSD (%)	Mean	Standard deviation		# reps a peak is present in	# reps a peak is present in	RSD (%)	RSD (%)
7860	M218T108_2	218.139	108.161	207887771	7860	Propionylcarnitine	C10H19NO4	107.04	218.139	[M+H]+1	1	64.2													3	3	3.74276	27.5544	4.95743e+08	1.85545e+07		3	3	7.71952	2.29303	4.53491e+08	3.50073e+07		3	3	72.1536	3.86634	3.78751e+08	2.73283e+08		3	3	5.8675	8.21279
15271	M314T344	314.232	343.762	1068603523									AcCa(10:1)+H	AcCa(10:1)+H	AcCa	C17 H32 O4 N1	314.233	A	314.232	-1.17	343.762	314.233	-0.1	346.14	3	3	1.64541	1.30667	1.15146e+09	1.89463e+07		3	3	9.03976	2.1148	1.17643e+09	1.06346e+08		3	3	3.63062	5.62167	1.16892e+09	4.24393e+07		3	3	2.07472	1.37104
15111	M312T306	312.216	306.403	4.72485e+08									AcCa(10:2)+H	AcCa(10:2)+H	AcCa	C17 H30 O4 N1	312.217	A	312.216	-1.62	306.403	312.217	-0.14	306.27	3	3	4.54729	5.33637	5.97642e+08	2.71765e+07		3	3	1.79033	3.19844	6.23046e+08	1.11546e+07		3	3	10.0528	2.99236	5.73178e+08	5.76204e+07		3	3	2	1.54328
16376	M330T387_2	330.263	387.315	1.62366e+07									AcCa(11:0)+H	AcCa(11:0)+H	AcCa	C18 H36 O4 N1	330.264	A	330.263	-1.26	387.315	330.264	-0.01	386.31	2	3	6.26908	5.92432	1.49819e+07	939229		2	1	8.12805	NaN	1.59595e+07	1.29719e+06		3	3	45.9633	36.1931	1.4167e+07	6.51161e+06		1	2	NaN	1.87463
16241	M328T374_1	328.248	373.905	2.21467e+08									AcCa(11:1)+H	AcCa(11:1)+H	AcCa	C18 H34 O4 N1	328.248	A	328.248	-1.13	373.905	328.248	-0.04	373.56	3	3	3.25809	5.75328	2.11012e+08	6.87496e+06		3	3	4.54762	3.62312	2.24148e+08	1.01934e+07		3	3	15.8979	4.52352	2.26701e+08	3.60407e+07		3	3	2.12744	1.81977
17127	M342T413	342.264	413.089	1.91991e+07									AcCa(12:1)+H	AcCa(12:1)+H	AcCa	C19 H36 O4 N1	342.264	A	342.264	-0.91	413.089	342.264	0	412.65	3	3	7.99506	11.7606	1.391e+07	1.11212e+06		3	3	15.0666	4.30841	1.58958e+07	2.39495e+06		2	0	33.6795	NaN	1.9265e+07	6.48833e+06		2	2	0.180621	3.39646
16886	M338T340	338.232	340.268	9.97534e+07									AcCa(12:3)+H	AcCa(12:3)+H	AcCa	C19 H32 O4 N1	338.233	A	338.232	-1.21	340.268	338.233	0	340.14	3	3	4.23636	1.24125	1.07202e+08	4.54145e+06		3	3	2.37791	0.895228	1.11982e+08	2.66284e+06		3	3	5.1151	5.39913	1.07783e+08	5.51323e+06		3	3	3.78605	0.816341
16777	M336T322	336.217	322.213	1.25696e+08									AcCa(12:4)+H	AcCa(12:4)+H	AcCa	C19 H30 O4 N1	336.217	A	336.217	-1.24	322.213	336.217	-0.09	322.08	3	3	3.47097	2.25096	1.30517e+08	4.5302e+06		3	3	4.35981	1.26324	1.43593e+08	6.26037e+06		3	3	2.93459	4.08682	1.34336e+08	3.9422e+06		3	3	0.883934	0.580594
18091	M358T507	358.295	507.491	2.5347e+06									AcCa(13:0)+H	AcCa(13:0)+H	AcCa	C20 H40 O4 N1	358.295	A	358.295	-1.15	507.491	358.295	-0.03	506.73	3	3	12.5204	28.7192	1.21748e+06	152433		3	3	21.4892	5.9377	1.45382e+06	312415		3	3	72.8794	16.6462	1.87493e+06	1.36644e+06		3	3	8.69052	6.38368
18651	M368T421	368.279	420.954	6.408e+06									AcCa(14:2)+H	AcCa(14:2)+H	AcCa	C21 H38 O4 N1	368.28	B	368.279	-0.9	420.954	368.28	0.02	420.69	3	3	9.80058	16.9814	4.35187e+06	426509		3	3	12.8073	4.9264	4.74906e+06	608228		3	3	47.9593	9.09221	5.55885e+06	2.66599e+06		3	3	2.0169	1.7166
11113	M260T272	260.185	271.687	6.9278e+07	11113	Hexanoylcarnitine	C13H25NO4	271.5	260.185	[M+H]+1	1	79.8	AcCa(6:0)+H	AcCa(6:0)+H	AcCa	C13 H26 O4 N1	260.186	A	260.185	-0.57	271.687	260.186	-0.07	271.287	3	3	1.13505	8.12213	1.13214e+08	1.28503e+06		3	3	0.312364	8.83167	1.13051e+08	353131		3	3	26.6019	2.63652	9.98348e+07	2.6558e+07		3	3	1.53845	1.0251
13305	M288T304_1	288.217	303.996	1.70756e+08									AcCa(8:0)+H	AcCa(8:0)+H	AcCa	C15 H30 O4 N1	288.217	A	288.217	-0.96	303.996	288.217	-0.13	304.17	3	3	4.90055	7.33521	2.22931e+08	1.09249e+07		3	3	3.65225	0.827675	2.36946e+08	8.65386e+06		3	3	12.6738	2.19778	2.07879e+08	2.63462e+07		3	3	0.875784	2.77594
14360	M302T329_1	302.232	329.398	9.85293e+08									AcCa(9:0)+H	AcCa(9:0)+H	AcCa	C16 H32 O4 N1	302.233	A	302.232	-0.92	329.398	302.233	0	329.37	3	3	5.30736	3.98433	1.12082e+09	5.94861e+07		3	3	11.1205	0.224243	1.26866e+09	1.41082e+08		3	3	0.582441	4.84445	1.09699e+09	6.38931e+06		3	3	1.815	2.47036
22275	M454T470	454.292	469.962	1.67009e+06									PE(16:0e)+H	PE(16:0e)+H	PE	C21 H45 O7 N1 P1	454.293	C	454.292	-0.87	469.962	454.293	0.01	469.92	3	3	25.7516	24.2271	816539	210272		3	3	30.1771	0.472922	1.2284e+06	370695		3	3	73.0479	4.32344	1.28895e+06	941552		3	3	7.4484	3.86
22623	M466T442_1	466.293	442.259	2.14797e+06									PE(17:1e)+H	PE(17:1e)+H	PE	C22 H45 O7 N1 P1	466.293	C	466.293	-0.52	442.259	466.293	0.05	442.23	3	3	3.71544	35.3872	1.68214e+06	62498.7		3	3	20.3587	2.49986	2.73185e+06	556170		3	3	74.6909	11.7229	3.14698e+06	2.35051e+06		3	3	3.48131	3.33919
6898	M204T58_1	204.123	58.4404	7.83512e+08	6898	Acetyl-L-carnitine	C9H17NO4	59.04	204.123	[M+H]+1	1	89.7													3	3	4.54257	22.0995	2.11702e+09	9.61672e+07		3	3	7.91359	1.89268	2.07439e+09	1.64159e+08		3	3	52.9726	2.49678	1.63704e+09	8.67181e+08		3	3	1.27295	6.49153
734	M118T47_3	118.086	47.0479	5.54465e+08	734	Betaine	C5H11NO2	46.74	118.086	[M+H]+1	1	83.7													3	3	3.64257	1.91335	7.44371e+08	2.71142e+07		3	3	1.34867	2.97383	7.63442e+08	1.02963e+07		3	3	13.5061	1.62878	6.9047e+08	9.32554e+07		3	3	1.61082	2.45455
1629	M132T48_2	132.077	48.1994	3057638408	1629	Creatine	C4H9N3O2	47.82	132.077	[M+H]+1	1	66.8													3	3	2.16503	1.2555	5.67698e+09	1.22908e+08		3	3	1.4539	1.50013	5.57712e+09	8.10858e+07		3	3	42.0291	1.49029	4.69461e+09	1.9731e+09		3	3	1.39733	1.82107
3765	M162T47_2	162.112	47.4759	1028075533	3765	D-Carnitine	C7H15NO3	47.1	162.112	[M+H]+1	1	85.3													3	3	3.0284	7.06162	2.35115e+09	7.12022e+07		3	3	3.30075	2.39625	2.16724e+09	7.15352e+07		3	3	51.5193	2.24249	1.83961e+09	9.47753e+08		3	3	1.08317	2.89702
5135	M180T258_2	180.065	257.619	1940541239	5135	Hippuric acid	C9H9NO3	257.58	180.065	[M+H]+1	1	88.2													3	3	2.07541	4.1722	2.53893e+09	5.26934e+07		3	3	4.06268	1.05044	2.77772e+09	1.1285e+08		3	3	16.7161	2.43801	2.33057e+09	3.8958e+08		3	3	1.41494	3.46105
1840	M137T58_2	137.046	58.1176	1.63036e+08	1840	Hypoxanthine	C5H4N4O	55.98	137.046	[M+H]+1	1	77.1													3	3	3.40845	6.03893	1.64258e+08	5.59865e+06		3	3	3.00592	2.6978	1.7325e+08	5.20774e+06		3	3	5.94435	8.63311	1.80413e+08	1.07244e+07		3	3	5.15339	4.61411
5845	M190T247_2	190.05	246.998	2.0446e+08	5845	Kynurenic acid	C10H7NO3	246.9	190.05	[M+H]+1	1	80.3													3	3	1.0363	13.3516	3.75508e+08	3.89137e+06		3	3	3.01883	1.16004	4.10105e+08	1.23804e+07		3	3	50.6055	3.6293	2.89178e+08	1.4634e+08		3	3	1.46945	0.92176
7242	M209T134	209.092	133.8	1.47611e+07	7242	L-Kynurenine	C10H12N2O3	134.1	209.092	[M+H]+1	1	75.5													0	0	NaN	NaN	NaN	NaN		0	0	NaN	NaN	NaN	NaN		0	0	NaN	NaN	NaN	NaN		3	3	9.77575	7.75489
4030	M166T162	166.086	161.646	3.43013e+08	4030	L-Phenylalanine	C9H11NO2	159.78	166.086	[M+H]+1	1	84.5													3	3	12.9293	27.8316	8.21792e+08	1.06252e+08		3	3	11.0995	6.24254	8.3137e+08	9.22781e+07		3	3	66.0559	3.73964	5.74946e+08	3.79785e+08		3	3	12.7046	5.14228
5324	M182T58_2	182.081	58.3812	2.03711e+08	5324	L-Tyrosine	C9H11NO3	57.54	182.081	[M+H]+1	1	74.3													3	3	3.61374	13.1516	3.28738e+08	1.18797e+07		3	3	3.07692	4.59991	3.42479e+08	1.05378e+07		3	3	32.3753	3.13041	2.85039e+08	9.22821e+07		3	3	2.28251	3.63219
5772	M188T46_2	188.176	45.8388	1.13468e+08	5772	N8-Acetylspermidine	C9H21N3O	45.84	188.176	[M+H]+1	1	71													3	3	5.08519	9.55508	2.03707e+08	1.03589e+07		3	3	3.74211	5.3975	1.75322e+08	6.56075e+06		3	3	52.0185	4.04785	1.65519e+08	8.61008e+07		3	3	3.50581	7.14814
7005	M206T241_1	206.045	241.244	4.39559e+07	7005	Xanthurenic acid	C10H7NO4	241.08	206.045	[M+H]+1	1	82.7													3	3	31.9226	30.2032	6.03037e+07	1.92505e+07		3	3	6.35323	5.29502	5.24324e+07	3.33115e+06		3	3	62.0499	29.4024	5.06726e+07	3.14423e+07		3	3	0.669009	0.958641
[truncated: 68 more columns]

## Sheet: URINE_C18_RP_NEG
TABLE S1F: URINE UHPLC-MS C18 (aqueous) REVERSED PHASE ASSAY NEGATIVE ION: COMPOUNDS IDENTIFIED USING MS/MS DATABASE MATCHES
INITIAL FILTERING - peaks retained:
- where present in <70% QC samples; - where QC RSD<30%, - where blank filter >5%
- XCMS minfrac =0.2
- peaks with a putative ID
- the highest peak intensity ionform for each putative ID
MS/MS Identification
- QC MS/MS files were submitted to both Thermo Fisher Compound Discoverer and Thermo Fisher Lipid Search to annotate polar and lipid compounds based on MS/MS spectral matches to databases.													100% ACN; 60 min, -20oC incubation							100% ACN; no incubation							100% ACN; 60 min, 4oC incubation							ACN:H2O 50:50; 60 min, -20oC incubation							ACN:H2O 50:50; no incubation							ACN:H2O 50:50; 60 min, 4oC incubation
					COMPOUND DISCOVERER MS/MS ID								Sample prep replicates	UHPLC-MS injection replicates	Sample prep replicates	UHPLC-MS injection replicates	Sample prep replicates	Sample prep replicates		Sample prep replicates	UHPLC-MS injection replicates	Sample prep replicates	UHPLC-MS injection replicates	Sample prep replicates	Sample prep replicates		Sample prep replicates	UHPLC-MS injection replicates	Sample prep replicates	UHPLC-MS injection replicates	Sample prep replicates	Sample prep replicates		Sample prep replicates	UHPLC-MS injection replicates	Sample prep replicates	UHPLC-MS injection replicates	Sample prep replicates	Sample prep replicates		Sample prep replicates	UHPLC-MS injection replicates	Sample prep replicates	UHPLC-MS injection replicates	Sample prep replicates	Sample prep replicates		Sample prep replicates	UHPLC-MS injection replicates
IDX	XCMS output name	MZ	RT	MPA	XCMS_index	Compound	Formula	RT	mz	Ion	Charge	mzcloud_score	# reps a peak is present in	# reps a peak is present in	RSD (%)	RSD (%)	Mean	Standard deviation		# reps a peak is present in	# reps a peak is present in	RSD (%)	RSD (%)	Mean	Standard deviation		# reps a peak is present in	# reps a peak is present in	RSD (%)	RSD (%)	Mean	Standard deviation		# reps a peak is present in	# reps a peak is present in	RSD (%)	RSD (%)	Mean	Standard deviation		# reps a peak is present in	# reps a peak is present in	RSD (%)	RSD (%)	Mean	Standard deviation		# reps a peak is present in	# reps a peak is present in
2459	M175T252_2	175.061	251.657	1.81551e+08	2459	2-Isopropylmalic acid	C7H12O5	251.34	175.061	[M-H]-1	-1	85.4	3	3	53.8331	11.6816	4.39874e+08	2.36798e+08		3	3	35.2673	50.9236	4.70249e+08	1.65844e+08		3	3	56.1116	49.5109	4.31166e+08	2.41934e+08		3	3	1.19701	1.35493	1.78238e+08	2.13352e+06		3	3	4.48687	2.11014	1.80159e+08	8.08351e+06		3	3
1619	M159T256	159.066	256.059	8.93825e+07	1619	3-Methyladipic acid	C7H12O4	255.78	159.066	[M-H]-1	-1	84.5	3	3	47.9909	9.80656	1.57093e+08	7.53903e+07		3	3	36.9092	43.7547	1.55603e+08	5.7432e+07		3	3	48.6029	45.9444	1.49007e+08	7.24216e+07		3	3	3.32378	1.75701	8.28317e+07	2.75315e+06		3	3	5.68497	6.01779	8.63786e+07	4.9106e+06		3	3
50	M103T93	103.04	92.6428	4.85307e+07	50	4-Hydroxybutyric acid	C4H8O3	92.34	103.04	[M-H]-1	-1	61.4	3	3	88.5985	12.7109	7.85204e+07	6.95679e+07		2	3	89.424	97.7214	8.81135e+07	7.87947e+07		3	3	88.3142	90.6872	8.27466e+07	7.30771e+07		1	1	NaN	NaN	3.2063e+07	NaN		1	0	NaN	NaN	3.44109e+07	NaN		1	0
1745	M161T276	161.025	276.419	1.06353e+07	1745	4-Hydroxycoumarin	C9H6O3	276.36	161.025	[M-H]-1	-1	68.7	3	3	117.517	10.1204	3.84302e+06	4.51621e+06		3	3	108.323	96.726	3.41609e+06	3.70041e+06		3	3	122.647	91.3145	4.55669e+06	5.58865e+06		3	3	2.62877	5.84875	9.49549e+06	249615		3	3	6.72663	2.74582	1.00513e+07	676111		3	3
994	M145T236_2	145.051	236.457	94202983	994	Adipic acid	C6H10O4	235.68	145.051	[M-H]-1	-1	79.5	3	3	55.5437	32.3933	2.26113e+08	1.25592e+08		3	3	48.8355	65.1139	2.21594e+08	1.08216e+08		3	3	68.5685	65.4619	2.14619e+08	1.47161e+08		3	3	0.640959	0.586335	8.7771e+07	562576		3	3	3.13468	1.12458	9.02287e+07	2.82838e+06		3	3
20723	M465T323	465.25	322.798	1.42032e+08	20723	Androsterone glucuronide	C25H38O8	319.74	465.25	[M-H]-1	-1	90.7	3	3	22.5955	2.01103	1.90909e+08	4.31369e+07		3	3	18.9227	22.3328	2.06222e+08	3.90228e+07		3	3	24.2536	22.4291	2.06603e+08	5.01087e+07		3	3	1.76587	2.98866	1.38862e+08	2.45212e+06		3	3	1.40598	1.37505	1.40497e+08	1.97536e+06		3	3
2735	M179T49_2	179.056	48.6383	1041739141	2735	Hexose monosaccharide	C6H12O6	48.12	179.056	[M-H]-1	-1	71.1	3	3	18.1749	10.6302	1.28064e+09	2.32754e+08		3	3	6.69719	18.7724	1.40807e+09	9.43014e+07		3	3	25.2699	19.5561	1.27947e+09	3.23321e+08		3	3	2.4287	1.485	1.12085e+09	2.72221e+07		3	3	1.85258	2.34015	1.11349e+09	2.06282e+07		3	3
1183	M149T49_2	149.046	49.059	759132384	1183	D-(+)-Xylose	C5H10O5	48.84	149.046	[M-H]-1	-1	63.1	3	3	22.8407	3.74461	1.01299e+09	2.31374e+08		3	3	14.2159	20.2025	1.09438e+09	1.55577e+08		3	3	23.5821	19.749	1.02853e+09	2.42548e+08		3	3	1.12425	0.505038	8.31173e+08	9.34445e+06		3	3	1.52532	1.38493	8.30058e+08	1.26611e+07		3	3
17471	M391T375	391.286	374.869	957562	17471	Deoxycholic acid	C24H40O4	374.76	391.286	[M-H]-1	-1	84.2	3	3	83.0091	6.54189	507739	421470		3	3	65.3742	57.8	478405	312753		3	3	82.4143	57.6828	517224	426267		3	3	1.17391	3.19207	973247	11425		3	3	3.34872	0.704318	946764	31704.4		3	3
1326	M153T212	153.019	212.072	3.87641e+07	1326	Gentisic acid	C7H6O4	210.66	153.019	[M-H]-1	-1	71.7	3	3	44.0301	4.54747	4.77471e+07	2.10231e+07		3	3	39.5731	41.5647	5.01192e+07	1.98337e+07		3	3	43.2982	41.0629	4.97317e+07	2.1533e+07		3	3	3.2734	2.85351	3.84176e+07	1.25756e+06		3	3	0.921871	4.11155	3.91975e+07	361350		3	3
3678	M195T47_3	195.051	47.4479	1084532672	3678	Gluconic acid	C6H12O7	45.96	195.051	[M-H]-1	-1	84.9	3	3	9.88402	17.7259	1.14103e+09	1.1278e+08		3	3	1.46677	16.9683	1.23939e+09	1.81791e+07		3	3	23.3045	16.5813	1.08172e+09	2.52088e+08		3	3	1.63817	2.46218	1.13766e+09	1.86368e+07		3	3	4.41622	2.23944	1.12388e+09	4.96328e+07		3	3
20684	M464T290	464.302	289.603	6.33802e+06	20684	Glycocholic acid	C26H43NO6	289.56	464.302	[M-H]-1	-1	87.2	3	3	41.3192	3.9744	1.10914e+07	4.58288e+06		3	3	26.4458	36.5783	1.19549e+07	3.16158e+06		3	3	41.1643	38.6233	1.13604e+07	4.6764e+06		3	3	1.65043	1.26795	6.12596e+06	101105		3	3	2.51908	2.18149	6.41205e+06	161525		3	3
231	M117T72_2	117.019	71.7152	4.62996e+08	231	Methylmalonic acid	C4H6O4	71.52	117.019	[M-H]-1	-1	80.1	3	3	71.6597	20.8731	9.06788e+08	6.49802e+08		3	3	50.2252	68.5678	7.80707e+08	3.92112e+08		3	3	73.5977	79.2659	7.9517e+08	5.85227e+08		3	3	0.986682	11.6135	3.05855e+08	3.01781e+06		3	3	7.77635	12.3504	3.4158e+08	2.65625e+07		3	3
745	M137T251	137.024	251.244	1.56534e+07	745	Salicylic acid	C7H6O3	250.98	137.024	[M-H]-1	-1	88.6	3	3	16.205	4.3738	1.36617e+07	2.21387e+06		3	3	8.8739	18.3592	1.3502e+07	1.19815e+06		3	3	16.5989	15.589	1.44932e+07	2.40571e+06		3	3	3.27665	2.13205	1.52752e+07	500513		3	3	4.40845	1.88036	1.52641e+07	672912		3	3
2339	M173T269_2	173.082	269.034	122558020	2339	Suberic acid	C8H14O4	268.92	173.082	[M-H]-1	-1	64.7	3	3	28.9092	2.45348	1.72303e+08	4.98115e+07		3	3	21.9174	24.2888	1.77305e+08	3.88606e+07		3	3	30.1316	25.8021	1.73408e+08	5.22504e+07		3	3	0.898153	0.48878	1.18729e+08	1.06637e+06		3	3	1.94408	0.528751	1.19776e+08	2.32855e+06		3	3
2031	M167T56	167.021	55.5016	4.22741e+08	2031	Uric acid	C5H4N4O3	54.24	167.021	[M-H]-1	-1	88.8	3	3	17.9753	2.63645	4.44705e+08	7.99369e+07		3	3	14.2411	17.8083	5.08237e+08	7.23785e+07		3	3	20.3415	14.9645	4.87887e+08	9.92435e+07		3	3	1.91037	0.404869	6.99756e+08	1.33679e+07		3	3	3.69253	1.27287	7.18499e+08	2.65308e+07		3	3
1266	M151T59	151.026	58.695	1.32607e+07	1266	Xanthine	C5H4N4O2	58.56	151.026	[M-H]-1	-1	71	3	3	13.0233	16.8136	1.04635e+07	1.3627e+06		3	3	21.6979	5.49572	1.11511e+07	2.41955e+06		3	3	16.4688	11.2532	1.14101e+07	1.8791e+06		3	3	3.88783	2.00868	1.08112e+07	420322		3	3	4.3804	4.27685	1.10431e+07	483731		3	3
4336	M204T241	204.03	241.296	1.80604e+07	4336	Xanthurenic acid	C10H7NO4	241.2	204.03	[M-H]-1	-1	86.4	3	3	45.57	6.63607	1.05055e+07	4.78738e+06		3	3	30.3102	42.2336	1.18679e+07	3.59718e+06		3	3	44.9241	44.0534	1.1125e+07	4.99782e+06		3	3	0.542989	0.692975	1.75589e+07	95342.6		3	3	2.72695	2.2419	1.79564e+07	489661		3	3
[truncated: 58 more columns]

## Sheet: URINE_HILIC_POS
TABLE S1G: URINE UHPLC-MS HILIC ASSAY POSITIVE ION: COMPOUNDS IDENTIFIED USING MS/MS DATABASE MATCHES
INITIAL FILTERING - peaks retained:
- where present in <70% QC samples; - where QC RSD<30%, - where blank filter >5%
- XCMS minfrac =0.2
- peaks with a putative ID
- the highest peak intensity ionform for each putative ID
MS/MS Identification
- QC MS/MS files were submitted to both Thermo Fisher Compound Discoverer and Thermo Fisher Lipid Search to annotate polar and lipid compounds based on MS/MS spectral matches to databases.																									100% ACN; 60 min, -20oC incubation							100% ACN; no incubation							100% ACN; 60 min, 4oC incubation							ACN:H2O 50:50; 60 min, -20oC incubation
					COMPOUND DISCOVERER MS/MS ID								LIPID SEARCH ID												Sample prep replicates	UHPLC-MS injection replicates	Sample prep replicates	UHPLC-MS injection replicates	Sample prep replicates	Sample prep replicates		Sample prep replicates	UHPLC-MS injection replicates	Sample prep replicates	UHPLC-MS injection replicates	Sample prep replicates	Sample prep replicates		Sample prep replicates	UHPLC-MS injection replicates	Sample prep replicates	UHPLC-MS injection replicates	Sample prep replicates	Sample prep replicates		Sample prep replicates	UHPLC-MS injection replicates	Sample prep replicates	UHPLC-MS injection replicates
IDX	XCMS output name	MZ	RT	MPA	XCMS_index	Compound	Formula	RT	mz	Ion	Charge	mzcloud_score	LipidIon	LipidGroup	Class	IonFormula	theor_mass	Grade	XCMS_mz	XCMS_mz_ppm	XCMS_rt	lipidsearch_mz	lipidsearch_mz_ppm	lipidsearch_rt	# reps a peak is present in	# reps a peak is present in	RSD (%)	RSD (%)	Mean	Standard deviation		# reps a peak is present in	# reps a peak is present in	RSD (%)	RSD (%)	Mean	Standard deviation		# reps a peak is present in	# reps a peak is present in	RSD (%)	RSD (%)	Mean	Standard deviation		# reps a peak is present in	# reps a peak is present in	RSD (%)	RSD (%)
9142	M218T385_2	218.139	384.859	2.79424e+08	9142	Propionylcarnitine	C10H19NO4	384.78	218.139	[M+H]+1	1	72.1													3	3	5.5257	0.69316	2.58683e+08	1.4294e+07		3	3	3.40979	2.38401	2.8596e+08	9.75064e+06		3	3	2.86211	2.63696	2.62682e+08	7.51824e+06		3	3	2.1637	2.11818
17541	M314T265	314.233	264.522	1.65751e+08									AcCa(10:1)+H	AcCa(10:1)+H	AcCa	C17 H32 O4 N1	314.233	A	314.233	1.21	264.522	314.232	-1.88	266.31	2	3	2.11708	4.73066	7.22362e+07	1.5293e+06		3	2	70.6711	32.528	4.93892e+07	3.49039e+07		2	2	0.160118	6.90846	7.41994e+07	118807		3	3	36.9591	26.4499
17235	M310T281_2	310.202	281.059	6.53661e+08									AcCa(10:3)+H	AcCa(10:3)+H	AcCa	C17 H28 O4 N1	310.201	A	310.202	1.33	281.059	310.201	-1.16	280.02	3	2	3.0994	2.08199	1.51085e+08	4.68271e+06		2	1	1.33755	NaN	1.72197e+08	2.30322e+06		2	1	4.42103	NaN	1.53166e+08	6.77154e+06		0	0	NaN	NaN
17093	M308T286	308.186	285.797	2.30693e+07									AcCa(10:4)+H	AcCa(10:4)+H	AcCa	C17 H26 O4 N1	308.186	A	308.186	1.14	285.797	308.186	0.01	285.75	2	3	3.19535	6.22455	7.25599e+06	231855		2	1	5.76089	NaN	7.82209e+06	450622		1	0	NaN	NaN	6.90595e+06	NaN		2	1	13.8404	NaN
18505	M328T265	328.249	264.716	4.16719e+07									AcCa(11:1)+H	AcCa(11:1)+H	AcCa	C18 H34 O4 N1	328.248	A	328.249	1.08	264.716	328.248	-1.78	263.52	3	3	5.77969	2.41453	8.11547e+06	469049		3	3	2.40592	3.27871	8.46926e+06	203764		3	3	3.84863	2.8681	8.24567e+06	317345		0	2	NaN	0.956168
19381	M342T257	342.264	257.006	6.79466e+06									AcCa(12:1)+H	AcCa(12:1)+H	AcCa	C19 H36 O4 N1	342.264	A	342.264	0.74	257.006	342.264	-0.62	253.05	0	0	NaN	NaN	NaN	NaN		0	0	NaN	NaN	NaN	NaN		0	0	NaN	NaN	NaN	NaN		0	0	NaN	NaN
19009	M336T268	336.217	267.639	2.47629e+07									AcCa(12:4)+H	AcCa(12:4)+H	AcCa	C19 H30 O4 N1	336.217	A	336.217	0.99	267.639	336.216	-1.89	267.66	3	3	31.561	16.465	8.64642e+06	2.7289e+06		3	3	16.1156	8.15311	8.24221e+06	1.32828e+06		2	2	0.948792	0.550231	7.21252e+06	68431.8		2	1	25.4326	NaN
12924	M260T307	260.186	306.599	3.99768e+07	12924	Hexanoylcarnitine	C13H25NO4	306.6	260.186	[M+H]+1	1	76	AcCa(6:0)+H	AcCa(6:0)+H	AcCa	C13 H26 O4 N1	260.186	B	260.186	1.44	306.599	260.186	-0.35	306.6	3	3	2.41925	1.62575	3.73492e+07	903569		3	3	0.991427	1.32977	3.97264e+07	393858		3	3	2.01071	2.03906	3.89448e+07	783068		1	2	NaN	14.7179
16648	M302T263	302.233	262.875	3.49798e+08									AcCa(9:0)+H	AcCa(9:0)+H	AcCa	C16 H32 O4 N1	302.233	A	302.233	1.2	262.875	302.232	-1.25	262.5	3	3	5.53513	21.2765	8.95636e+07	4.95746e+06		3	2	24.3424	5.3051	8.07163e+07	1.96482e+07		2	1	26.542	NaN	7.62975e+07	2.02509e+07		1	2	NaN	1.48844
25419	M704T303	703.576	303.046	380820	25419	Palmitoyl sphingomyelin	C39H79N2O6P	302.82	703.576	[M+H]+1	1	90.3	SM(d34:1)+H	SM(d34:1)+H	SM	C39 H80 O6 N2 P1	703.575	C	703.576	1.35	303.046	703.576	1.36	303.03	2	1	0.00525243	NaN	43651.8	2.29278		0	0	NaN	NaN	NaN	NaN		0	0	NaN	NaN	NaN	NaN		0	0	NaN	NaN
8012	M204T418_3	204.123	418.095	3833940513	8012	Acetyl-L-carnitine	C9H17NO4	417.84	204.123	[M+H]+1	1	88.7													3	3	2.37645	2.68928	3.36533e+09	7.99753e+07		3	3	2.00161	4.92106	3.773e+09	7.55207e+07		3	3	3.50543	4.48454	3.63283e+09	1.27346e+08		3	3	5.4156	2.86437
2350	M136T104_2	136.062	104.339	3.49757e+08	2350	Adenine	C5H5N5	103.68	136.062	[M+H]+1	1	88.2													3	3	4.3204	3.56633	2.06259e+08	8.91121e+06		2	3	3.88364	3.3164	2.25239e+08	8.74746e+06		3	3	1.91936	5.31085	2.00675e+08	3.85167e+06		3	3	38.5682	40.8
13622	M268T119	268.104	118.591	2.62443e+07	13622	Adenosine	C10H13N5O4	118.44	268.104	[M+H]+1	1	78.6													3	3	4.36746	5.90123	2.7639e+07	1.20712e+06		3	3	36.6954	37.3887	2.07518e+07	7.61494e+06		3	3	22.6496	1.25087	2.13743e+07	4.8412e+06		3	3	0.182708	2.23451
719	M104T295_2	104.107	295.032	8.77169e+08	719	Choline	C5H13NO	294.96	104.107	[M+H]+1	1	82.2													3	3	4.09176	3.99233	8.67329e+08	3.54891e+07		3	3	4.09169	4.4025	8.72676e+08	3.57071e+07		3	3	1.76683	0.712874	8.24838e+08	1.45734e+07		3	3	4.75485	1.66603
958	M112T231_2	112.051	230.533	265197129	958	Cytosine	C4H5N3O	230.58	112.051	[M+H]+1	1	92.4													3	3	1.62901	4.44861	2.49356e+08	4.06205e+06		3	3	3.24218	2.06652	2.49734e+08	8.09683e+06		3	3	1.9454	4.58193	2.43105e+08	4.72936e+06		3	3	2.90771	2.37591
3224	M148T416	148.097	415.673	1.00598e+08	3224	D-(+)-Proline	C5H9NO2	415.5	148.097	[M+H+MeOH]+1	1	91.3													3	3	2.76431	16.4054	9.66944e+07	2.67293e+06		3	3	4.13794	3.15574	1.00851e+08	4.17313e+06		3	3	1.55716	0.704801	9.95e+07	1.54937e+06		3	3	35.4644	36.8519
4332	M162T446_3	162.113	446.142	12202371086	4332	D-Carnitine	C7H15NO3	446.16	162.113	[M+H]+1	1	86.9													3	3	3.47616	2.43069	1.14737e+10	3.98843e+08		3	3	3.43384	1.50278	1.20671e+10	4.14365e+08		3	3	3.45486	1.74314	1.1926e+10	4.12027e+08		3	3	3.97616	1.98308
22698	M426T335	426.216	335.073	56169.7	22698	DL-Tryptophan	C11H12N2O2	335.64	426.216	[2M+NH4]+1	1	81.5													1	0	NaN	NaN	54961.8	NaN		1	2	NaN	0.45686	64378.9	NaN		2	1	15.6902	NaN	49061	7697.76		2	3	21.8878	25.0134
3480	M152T277	152.057	276.51	8.53823e+07	3480	Guanine	C5H5N5O	276.06	152.057	[M+H]+1	1	62.3													3	3	4.20032	0.573224	8.64706e+07	3.63204e+06		3	3	2.65163	1.16057	8.83741e+07	2.34335e+06		3	3	1.79763	0.934394	8.7545e+07	1.57374e+06		3	3	0.818256	1.46227
5823	M180T80_2	180.066	80.4269	3.78764e+08	5823	Hippuric acid	C9H9NO3	79.98	180.066	[M+H]+1	1	87.2													3	3	38.2879	6.23379	3.46911e+08	1.32825e+08		3	3	6.46347	5.5458	2.6529e+08	1.71469e+07		3	3	4.56907	1.53199	2.59522e+08	1.18578e+07		3	3	23.2168	5.29717
2395	M137T132_2	137.046	131.704	1760686662	2395	Hypoxanthine	C5H4N4O	131.58	137.046	[M+H]+1	1	95.2													3	3	3.07014	2.78984	1.82304e+09	5.59698e+07		3	3	2.20608	0.898939	1.81068e+09	3.9945e+07		3	3	2.5292	0.195911	1.76681e+09	4.46861e+07		3	3	1.38872	0.171389
6771	M190T255	190.05	255.118	2.41834e+08	6771	Kynurenic acid	C10H7NO3	255	190.05	[M+H]+1	1	81.8													3	3	29.4838	3.87019	2.29066e+08	6.75372e+07		3	3	26.6502	20.6936	2.38154e+08	6.34685e+07		3	3	0.810196	20.5716	2.65231e+08	2.14889e+06		3	3	1.20099	22.5372
5463	M175T514	175.119	514.384	2.37027e+07	5463	L-(+)-Arginine	C6H14N4O2	514.32	175.119	[M+H]+1	1	75.2													3	3	3.52145	0.977235	2.08652e+07	734757		3	3	3.31225	3.33512	2.11549e+07	700703		3	3	3.93161	1.3563	2.07648e+07	816391		3	3	3.60562	4.1267
5538	M176T471_2	176.103	470.849	2.51856e+07	5538	L-(+)-Citrulline	C6H13N3O3	470.76	176.103	[M+H]+1	1	77.5													3	3	4.47219	3.20545	2.51461e+07	1.12458e+06		3	3	1.81069	1.11325	2.40727e+07	435882		3	3	2.4554	3.51021	2.44429e+07	600171		3	3	2.58245	2.16867
3200	M148T474_3	148.061	474.275	2.38349e+08	3200	L-Glutamic acid	C5H9NO4	474.06	148.061	[M+H]+1	1	82.3													3	3	3.96283	1.5417	2.61263e+08	1.03534e+07		3	3	0.70344	1.28652	2.65827e+08	1.86993e+06		3	3	1.67802	1.62684	2.56242e+08	4.29979e+06		3	3	6.30724	2.77775
8398	M209T340_1	209.092	340.155	2.18248e+07	8398	L-Kynurenine	C10H12N2O3	340.74	209.092	[M+H]+1	1	85.1													3	3	6.06043	0.726303	2.32685e+07	1.41017e+06		3	3	2.43707	1.94987	2.23268e+07	544120		3	3	2.11655	2.06324	2.21017e+07	467793		3	3	3.6549	5.75989
642	M102T440	102.055	439.763	4.01285e+06	642	Threonine	C4H9NO3	439.68	102.055	[M+H-H2O]+1	1	83.7													3	3	0.513593	9.2984	3.02502e+06	15536.3		3	3	27.0775	30.663	4.7915e+06	1.29742e+06		3	3	33.1231	32.3292	3.73135e+06	1.23594e+06		3	3	28.2906	4.43402
[truncated: 68 more columns]

## Sheet: URINE_HILIC_NEG
TABLE S1H: URINE UHPLC-MS HILIC ASSAY NEGATIVE ION: COMPOUNDS IDENTIFIED USING MS/MS DATABASE MATCHES
INITIAL FILTERING - peaks retained:
- where present in <70% QC samples; - where QC RSD<30%, - where blank filter >5%
- XCMS minfrac =0.2
- peaks with a putative ID
- the highest peak intensity ionform for each putative ID
MS/MS Identification
- QC MS/MS files were submitted to Thermo Fisher Compound Discovererto annotate polar and lipid compounds based on MS/MS spectral matches to databases.													100% ACN; 60 min, -20oC incubation							100% ACN; no incubation							100% ACN; 60 min, 4oC incubation							ACN:H2O 50:50; 60 min, -20oC incubation							ACN:H2O 50:50; no incubation							ACN:H2O 50:50; 60 min, 4oC incubation
					COMPOUND DISCOVERER MS/MS ID								Sample prep replicates	UHPLC-MS injection replicates	Sample prep replicates	UHPLC-MS injection replicates	Sample prep replicates	Sample prep replicates		Sample prep replicates	UHPLC-MS injection replicates	Sample prep replicates	UHPLC-MS injection replicates	Sample prep replicates	Sample prep replicates		Sample prep replicates	UHPLC-MS injection replicates	Sample prep replicates	UHPLC-MS injection replicates	Sample prep replicates	Sample prep replicates		Sample prep replicates	UHPLC-MS injection replicates	Sample prep replicates	UHPLC-MS injection replicates	Sample prep replicates	Sample prep replicates		Sample prep replicates	UHPLC-MS injection replicates	Sample prep replicates	UHPLC-MS injection replicates	Sample prep replicates	Sample prep replicates		Sample prep replicates	UHPLC-MS injection replicates
IDX	XCMS output name	MZ	RT	MPA	XCMS_index	Compound	Formula	RT	mz	Ion	Charge	mzcloud_score	# reps a peak is present in	# reps a peak is present in	RSD (%)	RSD (%)	Mean	Standard deviation		# reps a peak is present in	# reps a peak is present in	RSD (%)	RSD (%)	Mean	Standard deviation		# reps a peak is present in	# reps a peak is present in	RSD (%)	RSD (%)	Mean	Standard deviation		# reps a peak is present in	# reps a peak is present in	RSD (%)	RSD (%)	Mean	Standard deviation		# reps a peak is present in	# reps a peak is present in	RSD (%)	RSD (%)	Mean	Standard deviation		# reps a peak is present in	# reps a peak is present in
20543	M465T278	465.251	278.229	1.53054e+07	20543	Androsterone glucuronide	C25H38O8	277.38	465.251	[M-H]-1	-1	89.5	3	3	23.0666	8.0795	7.34489e+06	1.69422e+06		3	3	2.635	1.61192	5.52355e+06	145546		3	3	24.1968	20.8893	6.25297e+06	1.51302e+06		3	3	23.1585	28.6502	1.12872e+07	2.61395e+06		3	3	29.6016	2.46699	1.01227e+07	2.99647e+06		3	3
18619	M407T40	407.282	39.9118	610965	18619	Cholic acid	C24H40O5	39.96	407.282	[M-H]-1	-1	78.8	3	3	3.38463	7.01122	497766	16847.6		3	3	2.19227	7.09214	515956	11311.1		3	3	0.548722	5.7428	486517	2669.63		3	3	12.5566	4.28607	433569	54441.6		3	3	53.1032	6.41609	635946	337707		3	3
8833	M243T316_1	243.063	315.957	3.44586e+08	8833	Pseudouridine	C9H12N2O6	316.08	243.063	[M-H]-1	-1	64.8	3	3	2.24949	1.12086	3.23674e+08	7.281e+06		3	3	2.04276	2.34035	3.40144e+08	6.94833e+06		3	3	1.02663	2.04195	3.38749e+08	3.47771e+06		3	3	4.42245	4.856	5.16525e+08	2.28431e+07		3	3	20.2878	5.22344	4.65741e+08	9.44883e+07		3	3
[truncated: 58 more columns]
