# Supplementary material for: Assessment of human plasma and urine sample preparation for reproducible and high-throughput UHPLC-MS clinical metabolic phenotyping
Source: Royal Society of Chemistry journal article supplement (doi:10.1039/d0an01319f), 2020-01-01
Supplement: d0an01319f3.xlsx [file d0an01319f3.xlsx]

## Sheet: Table_S2A_URINE_C18aq_RP
TABLE S2A: URINE UHPLC-MS C18 aqueous REVERSED PHASE ASSAY: COMPOUNDS IDENTIFIED USING MS/MS DATABASE MATCHES: VARIATIONS CAUSED BY INCUBATIONS DURING EXTRACTIONS
INITIAL FILTERING - peaks retained:
- where present in <70% QC samples; - where QC RSD<30%, - where blank filter >5%																										LEGEND
- XCMS minfrac =0.2																										unpaired ttest			fold change >15%
- peaks with a putative ID																										p<0.05			fold change >30%
- the highest peak intensity ionform for each putative ID																										p<0.01			fold change <15%
MS/MS Identification																													fold change <30%
- QC MS/MS files were submitted to both Thermo Fisher Compound Discoverer and Thermo Fisher Lipid Search to annotate polar and lipid compounds based on MS/MS spectral matches to databases.
	XCMS					COMPOUND DISCOVERER MS/MS ID								LIPID SEARCH ID (MS/MS)												100% ACN				50:50 ACN:H2O				100% MeOH				50:50 MeOH:H2O				50:50 MeOH:ACN
Ion mode	IDX	XCMS output name	MZ	RT	MPA	XCMS_index	Compound	Formula	RT	mz	Ion	Charge	mzcloud_score	LipidIon	LipidGroup	Class	IonFormula	theor_mass	Grade	XCMS_mz	XCMS_mz_ppm	XCMS_rt	lipidsearch_mz	lipidsearch_mz_ppm	lipidsearch_rt	60 min at -20oC incubation/no incubation		60 min on ice incubation/no incubation		60 min at -20oC incubation/no incubation		60 min on ice incubation/no incubation		60 min at -20oC incubation/no incubation		60 min on ice incubation/no incubation		60 min at -20oC incubation/no incubation		60 min on ice incubation/no incubation		60 min at -20oC incubation/no incubation		60 min on ice incubation/no incubation
																										p value	fold change	p value	fold change	p value	fold change	p value	fold change	p value	fold change	p value	fold change	p value	fold change	p value	fold change	p value	fold change	p value	fold change
POSITIVE ION C18 (aq) RP	6898	M204T58_1	204.123	58.4404	7.83512e+08	6898	Acetyl-L-carnitine	C9H17NO4	59.04	204.123	[M+H]+1	1	89.7													0.717729	1.02055	0.439112	0.789164	0.946061	1.00217	0.858668	0.992558	NA	NA	NA	NA	NA	NA	NA	NA	NA	0.926003	0.0823592	0.956802
POSITIVE ION C18 (aq) RP	734	M118T47_3	118.086	47.0479	5.54465e+08	734	Betaine	C5H11NO2	46.74	118.086	[M+H]+1	1	83.7													0.318312	0.975019	0.24919	0.904417	0.611022	1.00698	0.799158	0.996014	0.509274	1.01089	0.195723	1.00984	0.548107	1.00936	0.703871	0.993793	0.828891	1.00223	0.0651901	1.03863
POSITIVE ION C18 (aq) RP	1629	M132T48_2	132.077	48.1994	3057638408	1629	Creatine	C4H9N3O2	47.82	132.077	[M+H]+1	1	66.8													0.305264	1.01791	0.482114	0.841763	0.26313	1.01885	0.92092	1.00175	0.67074	0.994155	0.524093	0.990505	0.241903	0.988299	0.449219	0.993651	0.905302	1.00293	0.911388	0.997297
POSITIVE ION C18 (aq) RP	3765	M162T47_2	162.112	47.4759	1028075533	3765	D-Carnitine	C7H15NO3	47.1	162.112	[M+H]+1	1	85.3													0.0343129	1.08486	0.58262	0.848825	0.322414	1.01491	0.769342	0.994861	0.511308	0.99343	0.792126	1.00186	0.66295	0.99226	0.332892	0.981306	0.524994	0.993335	0.822241	0.99439
POSITIVE ION C18 (aq) RP	5135	M180T258_2	180.065	257.619	1940541239	5135	Hippuric acid	C9H9NO3	257.58	180.065	[M+H]+1	1	88.2													0.0293563	0.914035	0.128815	0.83902	0.00101157	0.921552	0.0263493	0.924228	0.435531	0.983609	0.738265	1.00611	0.0380833	0.976808	0.184435	0.975321	0.136638	1.04657	0.0629483	1.03769
POSITIVE ION C18 (aq) RP	1840	M137T58_2	137.046	58.1176	1.63036e+08	1840	Hypoxanthine	C5H4N4O	55.98	137.046	[M+H]+1	1	77.1													0.111349	0.9481	0.356795	1.04135	0.909026	0.994586	0.577671	0.979314	NA	NA	NA	NA	NA	NA	NA	NA	0.866174	1.00573	0.0777509	0.949696
POSITIVE ION C18 (aq) RP	5845	M190T247_2	190.05	246.998	2.0446e+08	5845	Kynurenic acid	C10H7NO3	246.9	190.05	[M+H]+1	1	80.3													0.00990013	0.91564	0.226966	0.705131	0.204817	0.965202	0.651013	0.985102	0.0799262	0.960604	0.247238	0.979778	0.0114712	0.954359	0.450141	0.98831	0.0584838	1.04079	0.261832	1.02473
POSITIVE ION C18 (aq) RP	7242	M209T134	209.092	133.8	1.47611e+07	7242	L-Kynurenine	C10H12N2O3	134.1	209.092	[M+H]+1	1	75.5													NA	NA	NA	NA	0.407151	0.880653	0.845493	1.02558	NA	NA	NA	NA	NA	NA	NA	NA	NA	NA	NA	NA
POSITIVE ION C18 (aq) RP	4030	M166T162	166.086	161.646	3.43013e+08	4030	L-Phenylalanine	C9H11NO2	159.78	166.086	[M+H]+1	1	84.5													0.911849	0.98848	0.319259	0.691565	0.707733	1.05802	0.435727	1.1331	0.948543	1.00287	0.280305	0.979705	0.0316023	0.955841	0.0935734	0.973008	0.359198	1.02592	0.359258	0.902603
POSITIVE ION C18 (aq) RP	5324	M182T58_2	182.081	58.3812	2.03711e+08	5324	L-Tyrosine	C9H11NO3	57.54	182.081	[M+H]+1	1	74.3													0.20832	0.959879	0.344434	0.832281	0.411207	0.963649	0.293493	0.952276	NA	NA	NA	NA	0.183924	0.901132	0.53733	0.971565	0.867386	0.993401	0.0742812	0.95979
POSITIVE ION C18 (aq) RP	5772	M188T46_2	188.176	45.8388	1.13468e+08	5772	N8-Acetylspermidine	C9H21N3O	45.84	188.176	[M+H]+1	1	71													0.0160027	1.1619	0.853701	0.944086	0.699998	0.978768	0.232012	1.08824	0.0534037	1.07742	0.204897	1.07318	0.16046	0.963795	0.2003	0.93159	0.98938	1.00055	0.0319114	1.08853
POSITIVE ION C18 (aq) RP	7005	M206T241_1	206.045	241.244	4.39559e+07	7005	Xanthurenic acid	C10H7NO4	241.08	206.045	[M+H]+1	1	82.7													0.523716	1.15012	0.927837	0.966436	0.164998	0.960039	0.232683	0.958382	0.736923	0.993317	0.35483	1.00906	0.000100194	0.935065	0.000135286	0.949573	0.00756297	1.11145	0.0261848	1.07794
POSITIVE ION C18 (aq) RP	15271	M314T344	314.232	343.762	1068603523									AcCa(10:1)+H	AcCa(10:1)+H	AcCa	C17 H32 O4 N1	314.233	A	314.232	-1.17	343.762	314.233	-0.1	346.14	0.709416	0.978781	0.915108	0.993622	0.97184	0.999276	0.937145	1.00194	0.070325	0.958802	0.896057	0.998116	0.435135	1.00914	0.80566	0.995186	0.942918	1.00546	0.511828	1.05019
POSITIVE ION C18 (aq) RP	15111	M312T306	312.216	306.403	4.72485e+08									AcCa(10:2)+H	AcCa(10:2)+H	AcCa	C17 H30 O4 N1	312.217	A	312.216	-1.62	306.403	312.217	-0.14	306.27	0.208543	0.959227	0.215075	0.919961	0.555171	1.01172	0.919217	0.998374	0.0222022	0.958105	0.295127	1.01793	0.3994	0.977529	0.455117	0.977227	0.0597797	0.94697	0.0169827	0.94645
POSITIVE ION C18 (aq) RP	16376	M330T387_2	330.263	387.315	1.62366e+07									AcCa(11:0)+H	AcCa(11:0)+H	AcCa	C18 H36 O4 N1	330.264	A	330.263	-1.26	387.315	330.264	-0.01	386.31	0.478995	0.938747	0.738846	0.887685	NA	1.50604	0.49776	1.25998	0.206924	0.712947	0.0932666	0.655009	0.306594	0.695268	0.695212	1.02236	0.269031	0.960044	0.246524	0.806714
POSITIVE ION C18 (aq) RP	16241	M328T374_1	328.248	373.905	2.21467e+08									AcCa(11:1)+H	AcCa(11:1)+H	AcCa	C18 H34 O4 N1	328.248	A	328.248	-1.13	373.905	328.248	-0.04	373.56	0.137905	0.941395	0.911703	1.01139	0.683015	0.99279	0.635385	0.982669	0.238161	0.974407	0.692204	0.99202	0.0831518	1.0694	0.457376	1.02649	0.0181562	0.932748	0.086942	0.940528
POSITIVE ION C18 (aq) RP	17127	M342T413	342.264	413.089	1.91991e+07									AcCa(12:1)+H	AcCa(12:1)+H	AcCa	C19 H36 O4 N1	342.264	A	342.264	-0.91	413.089	342.264	0	412.65	0.262674	0.875079	0.446725	1.21196	0.854001	0.990336	0.75998	0.985978	NA	0.962886	0.997436	0.99987	NA	1.12375	NA	1.0747	0.531741	0.989783	0.258043	0.988573
POSITIVE ION C18 (aq) RP	16886	M338T340	338.232	340.268	9.97534e+07									AcCa(12:3)+H	AcCa(12:3)+H	AcCa	C19 H32 O4 N1	338.233	A	338.232	-1.21	340.268	338.233	0	340.14	0.190848	0.957307	0.300587	0.962502	0.880462	0.993328	0.838728	0.99182	0.0456285	0.958211	0.0230783	0.985963	0.647717	0.989266	0.633504	0.984614	0.00126253	0.925589	0.0714269	0.919649
POSITIVE ION C18 (aq) RP	16777	M336T322	336.217	322.213	1.25696e+08									AcCa(12:4)+H	AcCa(12:4)+H	AcCa	C19 H30 O4 N1	336.217	A	336.217	-1.24	322.213	336.217	-0.09	322.08	0.0427797	0.908939	0.0961071	0.935533	0.663751	1.0043	0.462154	1.01614	0.347251	0.974092	0.442675	0.985148	0.0739662	0.972861	0.0627384	0.96866	0.518377	0.983974	0.468449	0.975444
POSITIVE ION C18 (aq) RP	18091	M358T507	358.295	507.491	2.5347e+06									AcCa(13:0)+H	AcCa(13:0)+H	AcCa	C20 H40 O4 N1	358.295	A	358.295	-1.15	507.491	358.295	-0.03	506.73	0.304243	0.837437	0.630287	1.28966	0.68326	1.02259	0.409827	0.9795	0.757006	1.02298	0.503479	1.04672	0.612782	0.966943	0.937975	0.991945	0.188193	0.922745	0.497167	1.08953
POSITIVE ION C18 (aq) RP	18651	M368T421	368.279	420.954	6.408e+06									AcCa(14:2)+H	AcCa(14:2)+H	AcCa	C21 H38 O4 N1	368.28	B	368.279	-0.9	420.954	368.28	0.02	420.69	0.406824	0.916365	0.635031	1.17051	0.745993	0.994882	0.949595	1.00307	0.419505	0.9836	0.672755	1.00852	0.027802	1.05748	0.163243	1.0551	0.136885	0.941095	0.449933	0.97271
POSITIVE ION C18 (aq) RP	13305	M288T304_1	288.217	303.996	1.70756e+08									AcCa(8:0)+H	AcCa(8:0)+H	AcCa	C15 H30 O4 N1	288.217	A	288.217	-0.96	303.996	288.217	-0.13	304.17	0.156518	0.940851	0.143627	0.877326	0.0102228	0.971473	0.993684	0.999857	0.453356	0.985099	0.929275	1.0009	0.838136	0.99602	0.522777	0.986262	0.263878	0.979301	0.312246	0.963603
POSITIVE ION C18 (aq) RP	14360	M302T329_1	302.232	329.398	9.85293e+08									AcCa(9:0)+H	AcCa(9:0)+H	AcCa	C16 H32 O4 N1	302.233	A	302.232	-0.92	329.398	302.233	0	329.37	0.169761	0.88347	0.103018	0.864683	0.133338	0.924233	0.838466	0.983023	0.0774769	0.976225	0.675475	1.00994	0.676258	0.993094	0.243554	0.976962	0.0831757	0.962054	0.0831266	0.951983
POSITIVE ION C18 (aq) RP	22275	M454T470	454.292	469.962	1.67009e+06									PE(16:0e)+H	PE(16:0e)+H	PE	C21 H45 O7 N1 P1	454.293	C	454.292	-0.87	469.962	454.293	0.01	469.92	0.169472	0.664718	0.92244	1.04929	0.215254	0.919473	0.611384	0.957458	0.472215	1.03382	0.748838	0.991484	0.686939	1.02342	0.699697	0.976495	0.795143	1.01204	0.609261	1.02239
POSITIVE ION C18 (aq) RP	22623	M466T442_1	466.293	442.259	2.14797e+06									PE(17:1e)+H	PE(17:1e)+H	PE	C22 H45 O7 N1 P1	466.293	C	466.293	-0.52	442.259	466.293	0.05	442.23	0.0314166	0.61575	0.780767	1.15196	0.0998903	0.937327	0.0853417	0.938403	0.295415	1.05688	0.0638332	1.05698	0.0486271	0.658371	0.00346255	0.73158	0.311804	1.05216	0.200269	1.04452
NEGATIVE ION C18 (aq) RP	2459	M175T252_2	175.061	251.657	1.81551e+08	2459	2-Isopropylmalic acid	C7H12O5	251.34	175.061	[M-H]-1	-1	85.4													0.864448	0.935407	0.828807	0.916889	0.710923	0.989335	0.908108	1.00403	0.430859	0.972223	0.65482	0.980034	0.14035	0.981024	0.377678	1.01122	0.206124	0.978682	0.216774	0.975051
NEGATIVE ION C18 (aq) RP	1619	M159T256	159.066	256.059	8.93825e+07	1619	3-Methyladipic acid	C7H12O4	255.78	159.066	[M-H]-1	-1	84.5													0.979586	1.00957	0.907581	0.957605	0.336494	0.958938	0.926896	0.995368	0.168692	0.959147	0.74854	0.986939	0.564411	0.976565	0.50559	1.02365	0.793683	1.00596	0.730292	1.01312
NEGATIVE ION C18 (aq) RP	50	M103T93	103.04	92.6428	4.85307e+07	50	4-Hydroxybutyric acid (GHB)	C4H8O3	92.34	103.04	[M-H]-1	-1	61.4													0.894337	0.891128	0.942479	0.939091	NA	0.93177	NA	1.02914	0.453639	1.22247	0.466706	1.22063	0.932432	0.970098	0.369405	0.75998	0.0617765	1.04251	0.517247	1.01676
NEGATIVE ION C18 (aq) RP	1745	M161T276	161.025	276.419	1.06353e+07	1745	4-Hydroxycoumarin	C9H6O3	276.36	161.025	[M-H]-1	-1	68.7													0.905327	1.12498	0.782852	1.33389	0.252589	0.944705	0.492929	0.970032	0.149303	1.05754	0.615084	0.980702	0.794259	0.995629	0.635433	0.991672	0.324279	1.02443	0.377071	1.01906
NEGATIVE ION C18 (aq) RP	994	M145T236_2	145.051	236.457	94202983	994	Adipic acid	C6H10O4	235.68	145.051	[M-H]-1	-1	79.5													0.964605	1.02039	0.95044	0.968522	0.213957	0.972762	0.518259	0.98509	0.726212	0.99362	0.784344	0.989759	0.0924983	0.965146	0.00966256	0.978032	0.35091	1.01531	0.865326	0.996193
NEGATIVE ION C18 (aq) RP	20723	M465T323	465.25	322.798	1.42032e+08	20723	Androsterone glucuronide	C25H38O8	319.74	465.25	[M-H]-1	-1	90.7													0.672074	0.925746	0.9922	1.00185	0.419241	0.988361	0.771974	1.0105	0.675616	0.985788	0.271283	0.960254	0.468301	0.985365	0.318388	1.02104	0.735251	0.988298	0.687591	0.982961
NEGATIVE ION C18 (aq) RP	2735	M179T49_2	179.056	48.6383	1041739141	2735	Hexose monosaccharide	C6H12O6	48.12	179.056	[M-H]-1	-1	71.1													0.429063	0.909494	0.544521	0.908667	0.727802	1.00661	0.932865	0.997894	0.489199	0.981841	0.722504	0.987572	0.439788	0.98525	0.0703717	1.01944	0.222239	1.0296	0.204352	1.02101
NEGATIVE ION C18 (aq) RP	1183	M149T49_2	149.046	49.059	759132384	1183	D-(+)-Xylose	C5H10O5	48.84	149.046	[M-H]-1	-1	63.1													0.639705	0.925626	0.712424	0.939824	0.908291	1.00134	0.954501	0.998744	0.385924	0.988215	0.239726	0.975411	0.257699	0.975679	0.0130129	1.02342	0.0605872	1.031	0.548554	1.0124
NEGATIVE ION C18 (aq) RP	17471	M391T375	391.286	374.869	957562	17471	Deoxycholic acid	C24H40O4	374.76	391.286	[M-H]-1	-1	84.2													0.927534	1.06132	0.904938	1.08114	0.245115	1.02797	0.320745	1.02607	0.392361	0.977563	0.259356	0.944233	0.858909	1.00662	0.00091883	1.07261	0.082793	1.09551	0.183506	1.06707
NEGATIVE ION C18 (aq) RP	1326	M153T212	153.019	212.072	3.87641e+07	1326	Gentisic acid	C7H6O4	210.66	153.019	[M-H]-1	-1	71.7													0.893827	0.952669	0.982807	0.992268	0.360223	0.980103	0.0984115	0.978162	0.605281	1.16064	0.67061	1.14676	0.50868	0.975801	0.758223	1.00538	0.679058	1.0125	0.660069	0.983732
NEGATIVE ION C18 (aq) RP	3678	M195T47_3	195.051	47.4479	1084532672	3678	Gluconic acid	C6H12O7	45.96	195.051	[M-H]-1	-1	84.9													0.210138	0.920638	0.340687	0.872778	0.675861	1.01226	0.866559	1.006	0.745468	1.00661	0.903998	0.9989	0.968695	0.999531	0.133101	1.01949	0.0889564	1.03644	0.077686	1.03757
NEGATIVE ION C18 (aq) RP	20684	M464T290	464.302	289.603	6.33802e+06	20684	Glycocholic acid	C26H43NO6	289.56	464.302	[M-H]-1	-1	87.2													0.801493	0.927767	0.864113	0.950266	0.0600234	0.955382	0.190626	0.968253	0.343875	0.975299	0.220826	0.933566	0.245859	0.96423	0.585574	0.978784	0.420061	0.967265	0.348635	0.958726
NEGATIVE ION C18 (aq) RP	231	M117T72_2	117.019	71.7152	4.62996e+08	231	Methylmalonic acid	C4H6O4	71.52	117.019	[M-H]-1	-1	80.1													0.787839	1.1615	0.973337	1.01853	0.0816164	0.895412	0.871351	1.01056	0.741537	0.993899	0.459987	0.980288	0.602937	0.988483	0.86518	1.00269	0.247453	1.06531	0.429698	1.06947
NEGATIVE ION C18 (aq) RP	745	M137T251	137.024	251.244	1.56534e+07	745	Salicylic acid	C7H6O3	250.98	137.024	[M-H]-1	-1	88.6													0.917813	1.01183	0.557693	1.07341	0.982922	1.00072	0.686729	1.01152	0.938495	0.99754	0.832794	1.01023	0.150388	0.955559	0.143811	0.976068	0.635689	0.985838	0.873738	0.995116
NEGATIVE ION C18 (aq) RP	2339	M173T269_2	173.082	269.034	122558020	2339	Suberic acid	C8H14O4	268.92	173.082	[M-H]-1	-1	64.7													0.897548	0.971788	0.922421	0.978018	0.517736	0.991253	0.864794	0.99671	0.82083	1.00518	0.73495	0.989348	0.0713693	0.966138	0.300629	0.984465	0.996298	1.00007	0.289618	0.980918
NEGATIVE ION C18 (aq) RP	2031	M167T56	167.021	55.5016	4.22741e+08	2031	Uric acid	C5H4N4O3	54.24	167.021	[M-H]-1	-1	88.8													0.365211	0.874995	0.788398	0.959959	0.335904	0.973914	0.364231	0.967749	NA	NA	NA	NA	NA	NA	NA	NA	0.222325	1.07488	0.227922	1.11778
NEGATIVE ION C18 (aq) RP	1266	M151T59	151.026	58.695	1.32607e+07	1266	Xanthine	C5H4N4O2	58.56	151.026	[M-H]-1	-1	71													0.6901	0.938338	0.890674	1.02322	0.564903	0.979006	0.680761	1.02597	NA	NA	NA	NA	NA	NA	NA	NA	0.886049	1.01196	0.95732	1.00351
NEGATIVE ION C18 (aq) RP	4336	M204T241	204.03	241.296	1.80604e+07	4336	Xanthurenic acid	C10H7NO4	241.2	204.03	[M-H]-1	-1	86.4													0.713643	0.885205	0.844689	0.937403	0.239657	0.977863	0.819629	0.995175	0.0563485	0.946365	0.512824	0.981622	0.094903	0.963949	0.0103812	0.978227	0.975724	1.00061	0.492467	0.983475

## Sheet: Table_S2B_URINE_HILIC
TABLE S2B: URINE UHPLC-MS HILIC ASSAY: COMPOUNDS IDENTIFIED USING MS/MS DATABASE MATCHES: VARIATIONS CAUSED BY INCUBATIONS DURING EXTRACTIONS
INITIAL FILTERING - peaks retained:
- where present in <70% QC samples; - where QC RSD<30%, - where blank filter >5%																										LEGEND
- XCMS minfrac =0.2																										unpaired ttest			fold change >15%
- peaks with a putative ID																										p<0.05			fold change >30%
- the highest peak intensity ionform for each putative ID																										p<0.01			fold change <15%
MS/MS Identification																													fold change <30%
- QC MS/MS files were submitted to both Thermo Fisher Compound Discoverer and Thermo Fisher Lipid Search to annotate polar and lipid compounds based on MS/MS spectral matches to databases.
	XCMS					COMPOUND DISCOVERER MS/MS ID								LIPID SEARCH ID (MS/MS)												100% ACN				50:50 ACN:H2O				100% MeOH				50:50 MeOH:H2O				50:50 MeOH:ACN
Ion mode	IDX	XCMS output name	MZ	RT	MPA	XCMS_index	Compound	Formula	RT	mz	Ion	Charge	mzcloud_score	LipidIon	LipidGroup	Class	IonFormula	theor_mass	Grade	XCMS_mz	XCMS_mz_ppm	XCMS_rt	lipidsearch_mz	lipidsearch_mz_ppm	lipidsearch_rt	60 min at -20oC incubation/no incubation		60 min on ice incubation/no incubation		60 min at -20oC incubation/no incubation		60 min on ice incubation/no incubation		60 min at -20oC incubation/no incubation		60 min on ice incubation/no incubation		60 min at -20oC incubation/no incubation		60 min on ice incubation/no incubation		60 min at -20oC incubation/no incubation		60 min on ice incubation/no incubation
																										p value	fold change	p value	fold change	p value	fold change	p value	fold change	p value	fold change	p value	fold change	p value	fold change	p value	fold change	p value	fold change	p value	fold change
POSITIVE ION HILIC	8012	M204T418_3	204.123	418.095	3833940513	8012	Acetyl-L-carnitine	C9H17NO4	417.84	204.123	[M+H]+1	1	88.7													0.00302701	0.891951	0.176387	0.962849	0.260169	0.957383	0.493795	0.985288	0.962085	1.00097	0.30891	0.967913	0.970587	0.998682	0.201461	0.956616	0.533169	0.90511	0.213138	0.989601
POSITIVE ION HILIC	2350	M136T104_2	136.062	104.339	3.49757e+08	2350	Adenine	C5H5N5	103.68	136.062	[M+H]+1	1	88.2													0.100542	0.915736	0.020214	0.890944	0.402878	1.27432	0.343678	1.27441	0.780962	1.01123	0.444059	0.969117	0.327021	1.13476	0.914866	0.980386	0.483639	1.13124	0.0147077	1.13779
POSITIVE ION HILIC	13622	M268T119	268.104	118.591	2.62443e+07	13622	Adenosine	C10H13N5O4	118.44	268.104	[M+H]+1	1	78.6													0.196721	1.33189	0.91064	1.03	0.542799	0.971908	0.765113	0.984231	0.559863	0.976762	0.0717745	0.946965	0.151803	0.966159	0.0191498	0.933974	0.803744	1.04944	0.967973	0.998817
POSITIVE ION HILIC	719	M104T295_2	104.107	295.032	8.77169e+08	719	Choline	C5H13NO	294.96	104.107	[M+H]+1	1	82.2													0.863003	0.993873	0.0981547	0.945183	0.602107	1.01911	0.963419	1.00196	0.61913	0.991712	0.415957	0.981999	0.798148	1.00748	0.264321	0.967832	0.4918	0.915068	0.657814	1.0154
POSITIVE ION HILIC	958	M112T231_2	112.051	230.533	265197129	958	Cytosine	C4H5N3O	230.58	112.051	[M+H]+1	1	92.4													0.945949	0.998489	0.287952	0.973456	0.451355	0.979382	0.346564	0.972913	0.585	1.02065	0.675848	1.00732	0.748316	0.991067	0.294998	0.969066	0.954712	0.991233	0.0141175	1.07423
POSITIVE ION HILIC	3224	M148T416	148.097	415.673	1.00598e+08	3224	D-(+)-Proline	C5H9NO2	415.5	148.097	[M+H+MeOH]+1	1	91.3													0.219994	0.958789	0.627023	0.986608	0.344802	1.28243	0.464271	1.26935	0.916285	0.996475	0.343928	0.95024	0.624817	0.992497	0.933523	0.996971	0.380986	0.843603	0.554153	0.978805
POSITIVE ION HILIC	4332	M162T446_3	162.113	446.142	12202371086	4332	D-Carnitine	C7H15NO3	446.16	162.113	[M+H]+1	1	86.9													0.148439	0.950822	0.697295	0.988309	0.894864	0.995187	0.790826	0.992395	0.884402	1.00336	0.768056	0.993528	0.953917	1.00136	0.456269	0.976041	0.388183	0.908741	0.394701	1.02373
POSITIVE ION HILIC	22698	M426T335	426.216	335.073	56169.7	22698	DL-Tryptophan	C11H12N2O2	335.64	426.216	[2M+NH4]+1	1	81.5													NA	0.853724	NA	0.762066	0.626407	1.1447	0.252382	0.755272	0.441043	1.41858	0.747523	1.14727	NA	1.05297	NA	0.926817	0.549335	0.862647	0.675635	1.11917
POSITIVE ION HILIC	3480	M152T277	152.057	276.51	8.53823e+07	3480	Guanine	C5H5N5O	276.06	152.057	[M+H]+1	1	62.3													0.488106	0.978461	0.63771	0.990618	0.402463	1.02998	0.590467	1.02367	0.518487	1.02947	0.675283	0.983971	0.934523	0.998096	0.547604	1.0137	0.261437	1.07398	0.00267853	1.03611
POSITIVE ION HILIC	5823	M180T80_2	180.066	80.4269	3.78764e+08	5823	Hippuric acid	C9H9NO3	79.98	180.066	[M+H]+1	1	87.2													0.350691	1.30767	0.656835	0.97826	0.906005	0.980005	0.0207543	0.657919	0.465055	0.867825	0.687793	1.01564	0.25775	0.767153	0.499851	0.864031	0.782162	1.03698	0.985747	1.00034
POSITIVE ION HILIC	2395	M137T132_2	137.046	131.704	1760686662	2395	Hypoxanthine	C5H4N4O	131.58	137.046	[M+H]+1	1	95.2													0.771057	1.00683	0.27371	0.975774	0.913592	1.0015	0.876313	0.996468	0.708967	1.01152	0.378053	0.982246	0.121068	1.0298	0.714588	0.992195	0.66299	1.07404	0.0829904	1.0837
POSITIVE ION HILIC	6771	M190T255	190.05	255.118	2.41834e+08	6771	Kynurenic acid	C10H7NO3	255	190.05	[M+H]+1	1	81.8													0.873367	0.961836	0.5012	1.11369	0.0830677	1.32145	0.470556	1.1571	0.607643	1.01142	0.238129	0.975861	0.703923	0.916459	0.864381	0.968329	0.664305	0.934276	0.67224	1.0102
POSITIVE ION HILIC	5463	M175T514	175.119	514.384	2.37027e+07	5463	L-(+)-Arginine	C6H14N4O2	514.32	175.119	[M+H]+1	1	75.2													0.64707	0.986306	0.564039	0.981559	0.00147337	1.22022	0.000889154	1.14203	0.471999	0.89897	0.65804	1.05703	0.0165381	0.873253	0.0256834	0.925676	0.355124	0.723539	0.918584	0.98748
POSITIVE ION HILIC	5538	M176T471_2	176.103	470.849	2.51856e+07	5538	L-(+)-Citrulline	C6H13N3O3	470.76	176.103	[M+H]+1	1	77.5													0.198072	1.04459	0.436133	1.01538	0.0945244	0.949161	0.229873	0.971369	0.987046	1.00042	0.868463	0.995908	0.327276	0.97501	0.114813	0.964323	0.556848	0.966583	0.000166346	1.07812
POSITIVE ION HILIC	3200	M148T474_3	148.061	474.275	2.38349e+08	3200	L-Glutamic acid	C5H9NO4	474.06	148.061	[M+H]+1	1	82.3													0.494258	0.982832	0.0239945	0.963941	0.889544	1.01405	0.676476	1.04207	0.545743	0.989952	0.19353	0.981953	0.144501	1.03775	0.830366	0.995441	0.763983	1.01641	0.0581558	1.04354
POSITIVE ION HILIC	8398	M209T340_1	209.092	340.155	2.18248e+07	8398	L-Kynurenine	C10H12N2O3	340.74	209.092	[M+H]+1	1	85.1													0.341264	1.04218	0.615694	0.989916	0.0860242	1.27078	0.560689	1.08036	0.920988	0.996254	0.0603241	0.944014	0.789005	1.00558	0.0427904	0.942186	0.736652	0.957192	0.0639263	1.04631
POSITIVE ION HILIC	642	M102T440	102.055	439.763	4.01285e+06	642	Threonine	C4H9NO3	439.68	102.055	[M+H-H2O]+1	1	83.7													0.077826	0.63133	0.363409	0.778745	0.288381	1.25979	0.581891	1.03315	0.893348	0.970024	0.240297	1.31503	0.829601	0.962335	0.353098	0.813526	0.819271	1.06019	0.0875556	1.33744
POSITIVE ION HILIC	17541	M314T265	314.233	264.522	1.65751e+08									AcCa(10:1)+H	AcCa(10:1)+H	AcCa	C17 H32 O4 N1	314.233	A	314.233	1.21	264.522	314.232	-1.88	266.31	0.444687	1.46259	0.410613	1.50234	0.131541	0.694979	0.502708	0.952092	0.395777	0.982318	0.112597	0.608723	0.0688518	0.787099	0.247237	0.859895	NA	0.89665	NA	0.942717
POSITIVE ION HILIC	17235	M310T281_2	310.202	281.059	6.53661e+08									AcCa(10:3)+H	AcCa(10:3)+H	AcCa	C17 H28 O4 N1	310.201	A	310.202	1.33	281.059	310.201	-1.16	280.02	0.010639	0.877395	0.0639326	0.889485	NA	NA	NA	NA	0.503297	0.965742	0.574562	0.965958	NA	0.972386	NA	0.94992	0.264369	0.827065	0.387855	0.927989
POSITIVE ION HILIC	17093	M308T286	308.186	285.797	2.30693e+07									AcCa(10:4)+H	AcCa(10:4)+H	AcCa	C17 H26 O4 N1	308.186	A	308.186	1.14	285.797	308.186	0.01	285.75	0.25493	0.927628	NA	0.882878	NA	1.06672	NA	1.06493	0.315416	1.02682	0.811629	1.007	0.096434	0.964429	0.0269772	0.939327	0.766728	0.958278	0.280976	1.04355
POSITIVE ION HILIC	18505	M328T265	328.249	264.716	4.16719e+07									AcCa(11:1)+H	AcCa(11:1)+H	AcCa	C18 H34 O4 N1	328.248	A	328.249	1.08	264.716	328.248	-1.78	263.52	0.296951	0.958226	0.362512	0.9736	NA	NA	NA	NA	0.343694	1.07101	0.615957	1.01179	0.646928	0.946257	0.0372579	0.87143	0.68976	0.949599	0.19549	1.10306
POSITIVE ION HILIC	19381	M342T257	342.264	257.006	6.79466e+06									AcCa(12:1)+H	AcCa(12:1)+H	AcCa	C19 H36 O4 N1	342.264	A	342.264	0.74	257.006	342.264	-0.62	253.05	NA	NA	NA	NA	NA	NA	NA	NA	0.479459	1.15772	0.806195	0.959677	0.0365731	0.897301	0.865569	0.993338	0.00127445	0.688392	0.095105	0.930445
POSITIVE ION HILIC	19009	M336T268	336.217	267.639	2.47629e+07									AcCa(12:4)+H	AcCa(12:4)+H	AcCa	C19 H30 O4 N1	336.217	A	336.217	0.99	267.639	336.216	-1.89	267.66	0.828881	1.04904	0.375051	0.875072	0.353623	0.84832	NA	0.945398	0.643167	0.948425	0.928696	0.987076	0.0256588	0.898473	0.00236787	0.885321	0.802004	0.953178	0.00263849	1.18302
POSITIVE ION HILIC	16648	M302T263	302.233	262.875	3.49798e+08									AcCa(9:0)+H	AcCa(9:0)+H	AcCa	C16 H32 O4 N1	302.233	A	302.233	1.2	262.875	302.232	-1.25	262.5	0.491609	1.10961	0.82308	0.945256	NA	0.982394	NA	0.91487	0.483673	1.19014	0.972973	0.990266	0.202742	0.82736	0.162178	0.821239	0.632263	0.926024	0.333251	1.03255
NEGATIVE ION HILIC	20543	M465T278	465.251	278.229	1.53054e+07	20543	Androsterone glucuronide	C25H38O8	277.38	465.251	[M-H]-1	-1	89.5													0.137163	1.32974	0.452606	1.13206	0.638664	1.11504	0.593875	1.1397	0.687449	0.920359	0.307148	1.30775	0.525615	0.964953	0.0877883	0.872058	0.14591	0.873603	0.644731	0.971016
NEGATIVE ION HILIC	18619	M407T40	407.282	39.9118	610965	18619	Cholic acid	C24H40O5	39.96	407.282	[M-H]-1	-1	78.8													0.195484	0.964746	0.0118074	0.942944	0.363414	0.68177	0.283767	0.619434	NA	NA	NA	NA	0.941748	1.00592	0.607728	0.961852	NA	NA	NA	NA
NEGATIVE ION HILIC	8833	M243T316_1	243.063	315.957	3.44586e+08	8833	Pseudouridine	C9H12N2O6	316.08	243.063	[M-H]-1	-1	64.8													0.0471277	0.951578	0.771371	0.995899	0.416711	1.10904	0.324191	1.13788	0.179954	1.32562	0.164911	1.47203	0.202858	0.916545	0.533479	1.13544	0.00197154	0.926922	0.343595	0.985453

## Sheet: Table_S2C_PLASMA_HILIC
TABLE S2C: PLASMA UHPLC-MS HILIC ASSAY: COMPOUNDS IDENTIFIED USING MS/MS DATABASE MATCHES: VARIATIONS CAUSED BY INCUBATIONS DURING EXTRACTIONS
INITIAL FILTERING - peaks retained:
- where present in <70% QC samples; - where QC RSD<30%, - where blank filter >5%																										LEGEND
- XCMS minfrac =0.2																										unpaired ttest			fold change >15%
- peaks with a putative ID																										p<0.05			fold change >30%
- the highest peak intensity ionform for each putative ID																										p<0.01			fold change <15%
MS/MS Identification																													fold change <30%
- QC MS/MS files were submitted to both Thermo Fisher Compound Discoverer and Thermo Fisher Lipid Search to annotate polar and lipid compounds based on MS/MS spectral matches to databases.
	XCMS					COMPOUND DISCOVERER MS/MS ID								LIPID SEARCH ID (MS/MS)												100% ACN				50:50 ACN:MeOH				100% MeOH				CHCl3:MeOH:H2O		DCM:MeOH:H2O		MTBE:MeOH:H2O
Ion mode	IDX	galaxyIDX	MZ	RT	MPA	XCMS_index	Compound	Formula	RT	mz	Ion	Charge	mzcloud_score	LipidIon	LipidGroup	Class	IonFormula	theor_mass	Grade	XCMS_mz	XCMS_mz_ppm	XCMS_rt	lipidsearch_mz	lipidsearch_mz_ppm	lipidsearch_rt	60 min at -20oC incubation/no incubation		60 min on ice incubation/no incubation		60 min at -20oC incubation/no incubation		60 min on ice incubation/no incubation		60 min at -20oC incubation/no incubation		60 min on ice incubation/no incubation		20 min biphase partition/1 min partition		20 min biphase partition/1 min partition		20 min biphase partition/1 min partition
																										p value	fold change	p value	fold change	p value	fold change	p value	fold change	p value	fold change	p value	fold change	p value	fold change	p value	fold change	p value	fold change
HILIC POSITIVE ION	3248	M195T33	195.088	33.1752	5.30125e+06	3248	Caffeine	C8H10N4O2	31.62	195.088	[M+H]+1	1	92													0.0396566	0.933745	0.920929	0.997047	0.108472	0.857681	0.156422	0.864626	0.217441	1.08835	0.97949	1.00161	0.233962	1.23176	0.370097	0.952306	0.927146	0.994093
HILIC POSITIVE ION	359	M104T292_2	104.107	292.376	3.56259e+08	359	Choline	C5H13NO	292.32	104.107	[M+H]+1	1	79.7													0.449273	1.04496	0.257631	1.05998	0.798221	0.988052	0.91374	0.995394	0.872747	0.995195	0.353982	0.970777	7.20836e-05	1.20982	0.00993073	1.08091	0.670314	0.968095
HILIC POSITIVE ION	949	M132T432_2	132.066	431.709	2.97092e+07	949	Hydroxy-D-proline	C5H9NO3	431.46	132.066	[M+H]+1	1	84.8													0.0286156	1.13609	0.0720471	1.22992	0.199418	1.21911	0.0997313	1.23609	0.0945509	1.1188	0.723112	1.01229	0.15493	1.07319	0.270379	1.29405	0.298398	1.05417
HILIC POSITIVE ION	491	M112T225	112.051	225.478	3.94712e+06	491	Cytosine	C4H5N3O	225.36	112.051	[M+H]+1	1	81.4													0.842314	1.01001	0.0824723	1.08662	0.113345	0.89628	0.863795	0.989987	0.141875	0.968955	0.64207	0.991622	0.00909431	1.171	0.17775	1.11031	0.092652	0.920334
HILIC POSITIVE ION	3603	M205T333_2	205.097	333.345	1.50221e+08	3603	DL-Tryptophan	C11H12N2O2	333.06	205.097	[M+H]+1	1	86													0.40376	1.05028	0.0597513	1.12203	0.952435	1.00478	0.31025	1.07303	0.0759442	0.944376	0.335437	0.948053	0.0741972	1.09335	0.105852	1.18982	0.107864	0.916368
HILIC POSITIVE ION	1132	M137T128	137.046	128.43	136173996	1132	Hypoxanthine	C5H4N4O	127.56	137.046	[M+H]+1	1	90.9													0.895493	1.00527	0.196089	1.05752	0.669321	0.966013	0.548144	1.03244	0.257041	1.15911	0.933614	0.983892	0.0189124	1.15557	0.111042	1.16964	0.610055	0.976074
HILIC POSITIVE ION	967	M132T357_2	132.102	357.193	1.69456e+08	967	L-Isoleucine	C6H13NO2	357	132.102	[M+H]+1	1	75													0.0186714	1.09917	0.0177643	1.0812	0.0977964	1.13708	0.089077	1.14509	0.0591219	0.959908	0.637287	0.973852	0.109879	1.0936	0.616753	1.04529	0.682164	1.02294
HILIC POSITIVE ION	3741	M209T338	209.092	338.004	8.04085e+06	3741	L-Kynurenine	C10H12N2O3	336.06	209.092	[M+H]+1	1	78.7													0.376445	1.03781	0.090002	1.14583	0.763427	1.0356	0.401961	1.10345	0.196743	0.968426	0.03578	0.928577	0.136344	1.07998	0.142861	1.20633	0.243061	0.940743
HILIC POSITIVE ION	665	M120T439	120.065	438.728	2.40129e+07	665	Threonine	C4H9NO3	438.54	120.065	[M+H]+1	1	91.2													0.00659594	1.14969	0.148985	1.08675	0.249299	1.26748	0.230437	1.22528	NA	NA	0.0594501	1.10616	0.040514	1.20559	0.286403	1.21214	0.161542	0.926721
HILIC POSITIVE ION	7794	M312T272	312.217	272.496	5.01098e+06									AcCa(10:2)+H	AcCa(10:2)+H	AcCa	C17 H30 O4 N1	312.217	A	312.217	0.04	272.496	312.217	0.1	271.68	0.161569	1.06625	0.622607	1.03305	0.114081	0.886864	0.198515	0.968716	0.211054	0.951276	0.0832052	0.953358	0.00172842	1.24098	0.437405	1.08791	0.0872384	0.913245
HILIC POSITIVE ION	7661	M308T281	308.186	281.41	889973									AcCa(10:4)+H	AcCa(10:4)+H	AcCa	C17 H26 O4 N1	308.186	B	308.186	0.17	281.41	308.186	0.13	281.25	0.544961	1.03787	0.363685	1.07231	0.0908561	0.848297	0.607947	0.969071	0.150125	0.94734	0.695911	0.991685	0.00341958	1.26783	0.617847	1.04422	0.949852	0.994152
HILIC POSITIVE ION	8930	M344T243	344.28	242.982	1.06516e+06									AcCa(12:0)+H	AcCa(12:0)+H	AcCa	C19 H38 O4 N1	344.28	A	344.28	0.04	242.982	344.28	-0.01	242.85	NA	NA	NA	NA	NA	NA	NA	NA	NA	NA	NA	NA	NA	NA	0.01502	1.10948	NA	0.980182
HILIC POSITIVE ION	8797	M342T254	342.264	254.16	8.54428e+06									AcCa(12:1)+H	AcCa(12:1)+H	AcCa	C19 H36 O4 N1	342.264	A	342.264	-0.42	254.16	342.264	0.09	253.89	0.565767	0.901774	0.57082	0.856049	0.146236	0.88925	0.449174	0.979142	0.125733	1.22089	0.425015	1.08305	0.360672	1.27149	0.868093	1.00874	0.352473	0.846633
HILIC POSITIVE ION	9362	M358T242	358.295	241.86	1.55142e+06									AcCa(13:0)+H	AcCa(13:0)+H	AcCa	C20 H40 O4 N1	358.295	A	358.295	0.35	241.86	358.295	0.04	236.7	0.127601	1.19996	0.416479	0.913215	0.76585	0.936429	0.942401	1.01044	0.291132	1.10836	0.576348	1.0588	NA	NA	NA	1.15522	NA	NA
HILIC POSITIVE ION	10565	M400T239	400.342	238.609	1.19607e+07									AcCa(16:0)+H	AcCa(16:0)+H	AcCa	C23 H46 O4 N1	400.342	A	400.342	-0.26	238.609	400.342	0.15	232.71	0.0931564	1.09429	0.199783	1.09391	NA	0.802052	NA	0.845259	0.40538	0.970947	0.141453	0.943898	NA	0.773866	NA	0.971849	NA	NA
HILIC POSITIVE ION	10515	M398T237	398.326	236.684	2.86914e+06									AcCa(16:1)+H	AcCa(16:1)+H	AcCa	C23 H44 O4 N1	398.326	A	398.326	-0.07	236.684	398.327	0.13	233.16	0.125176	1.07367	0.240784	1.0842	0.663682	0.967652	0.437437	0.925093	0.714039	1.03733	0.917867	1.00867	0.862545	0.946818	0.0369092	0.815118	0.364391	0.939137
HILIC POSITIVE ION	11132	M426T232	426.358	231.741	1.36807e+07									AcCa(18:1)+H	AcCa(18:1)+H	AcCa	C25 H48 O4 N1	426.358	A	426.358	-0.38	231.741	426.358	0.04	231.42	0.212251	1.07094	0.342773	1.0727	0.424741	1.2753	0.500515	1.20706	0.110654	0.898543	0.255688	0.938364	NA	1.05533	NA	0.692838	NA	NA
HILIC POSITIVE ION	6953	M288T277	288.217	277.002	2.73914e+07									AcCa(8:0)+H	AcCa(8:0)+H	AcCa	C15 H30 O4 N1	288.217	A	288.217	0.33	277.002	288.217	0.13	277.08	0.138785	1.17059	0.148431	1.16555	0.0160681	0.793967	0.0800698	0.91252	0.188591	0.949348	0.175934	0.954852	0.0139583	1.18816	0.746164	1.02576	0.0495309	0.935165
HILIC POSITIVE ION	7465	M302T258	302.233	258.289	1.42117e+06									AcCa(9:0)+H	AcCa(9:0)+H	AcCa	C16 H32 O4 N1	302.233	A	302.233	-0.1	258.289	302.233	0.07	257.07	0.386075	0.956842	0.578816	1.04614	0.0140456	0.632481	0.00188583	0.734192	0.358947	0.846124	0.0725698	0.676753	0.124164	1.24344	0.515996	0.836602	0.310978	1.14733
HILIC POSITIVE ION	11931	M468T316	468.308	316.402	1.44587e+07									LPC(14:0)+H	LPC(14:0)+H	LPC	C22 H47 O7 N1 P1	468.308	B	468.308	-0.18	316.402	468.309	0.21	316.047	0.304058	1.11479	0.65068	0.969037	0.131033	0.851356	0.746148	0.967241	0.237106	1.10504	0.0583526	1.16075	0.326381	1.13724	0.0569865	1.04517	0.127967	0.879541
HILIC POSITIVE ION	11679	M454T319	454.329	319.339	206561									LPC(14:0e)+H	LPC(14:0e)+H	LPC	C22 H49 O6 N1 P1	454.329	B	454.329	-0.4	319.339	454.329	0.08	319.23	0.123238	1.04855	0.706048	1.02944	0.97261	1.00371	0.286471	1.09216	0.291182	0.940186	0.265468	1.06533	0.160111	1.2459	0.822125	1.02052	0.127766	0.94233
HILIC POSITIVE ION	12171	M482T315	482.324	314.963	1.05469e+07									LPC(15:0)+H	LPC(15:0)+H	LPC	C23 H49 O7 N1 P1	482.324	B	482.324	0.51	314.963	482.324	0.33	314.477	0.942693	1.00495	0.540007	0.953377	0.386341	0.922161	0.880292	0.98778	0.596625	1.0184	0.234722	1.03951	0.444756	1.14952	0.389086	1.03629	0.237938	0.893572
HILIC POSITIVE ION	12366	M496T314_2	496.339	313.612	1368414156									LPC(16:0)+H	LPC(16:0)+H	LPC	C24 H51 O7 N1 P1	496.34	B	496.339	-1.11	313.612	496.34	-0.04	312.948	0.156267	1.06423	0.0235323	1.07095	0.977229	1.00101	0.800197	1.01595	0.271464	1.09529	0.962129	0.997298	0.611638	1.09628	0.358213	0.95245	0.137539	0.871967
HILIC POSITIVE ION	12367	M496T307	496.339	307.388	2.65231e+08									LPC(16:0)+H	LPC(16:0)+H	LPC	C24 H51 O7 N1 P1	496.34	B	496.339	-0.75	307.388	496.34	-0.04	312.948	0.142802	1.10116	0.00596036	1.13092	0.654061	1.05617	0.335522	1.05379	0.330446	0.945204	0.867192	0.988158	0.522124	1.17224	0.665121	0.968777	0.899319	0.992003
HILIC POSITIVE ION	12175	M482T317	482.36	316.529	1.27704e+07									LPC(16:0e)+H	LPC(16:0e)+H	LPC	C24 H53 O6 N1 P1	482.361	B	482.36	-0.41	316.529	482.36	-0.05	316.38	0.0405063	1.17488	0.422037	1.05688	0.702912	0.966912	0.410323	1.0916	0.423724	1.04257	0.490915	1.0385	0.612512	1.10034	0.713893	0.983381	0.0493182	0.869016
HILIC POSITIVE ION	12337	M494T314	494.324	314.295	2.93488e+07									LPC(16:1)+H	LPC(16:1)+H	LPC	C24 H49 O7 N1 P1	494.324	B	494.324	0.01	314.295	494.324	0.27	314.251	0.427656	1.07145	0.812211	1.02308	0.84388	1.02912	0.140295	1.05116	0.838902	1.01226	0.255946	1.10073	0.686116	1.0736	0.503635	0.982748	0.265279	0.903058
HILIC POSITIVE ION	12144	M480T306	480.345	306.259	1.96324e+07									LPC(16:1e)+H	LPC(16:1e)+H	LPC	C24 H51 O6 N1 P1	480.345	B	480.345	0	306.259	480.345	0.04	306.06	0.150832	1.11015	0.0305623	1.12749	0.757298	1.02676	0.363795	1.04617	0.800143	0.99045	0.976003	0.998022	0.975589	1.00596	0.360968	0.942662	0.360752	0.909667
HILIC POSITIVE ION	12527	M508T313	508.34	312.918	2.44806e+06									LPC(17:1)+H	LPC(17:1)+H	LPC	C25 H51 O7 N1 P1	508.34	B	508.34	-0.33	312.918	508.34	0.25	312.6	0.174176	1.15442	0.198428	1.18321	0.772546	1.03731	0.798374	0.970545	0.675599	1.03338	0.17202	0.882395	0.970818	1.00691	0.853185	0.988807	0.791722	0.983843
HILIC POSITIVE ION	12762	M524T311	524.37	311.112	4.52082e+08									LPC(18:0)+H	LPC(18:0)+H	LPC	C26 H55 O7 N1 P1	524.371	B	524.37	-1.56	311.112	524.371	0.12	310.918	0.0842121	1.08034	0.0769424	1.10862	0.665375	0.970825	0.801382	0.988099	0.316504	0.937392	0.520409	1.05995	0.951783	1.01769	0.564483	0.960476	0.015162	0.883164
HILIC POSITIVE ION	12530	M508T314	508.375	314.47	9.65483e+06									LPC(18:1e)+H	LPC(18:1e)+H	LPC	C26 H55 O6 N1 P1	508.376	B	508.375	-1.51	314.47	508.376	-0.26	314.4	0.132423	1.12125	0.112532	1.17872	0.722312	0.953303	0.450194	0.907837	0.459285	0.952179	0.928399	1.01134	0.660163	1.12257	0.183847	0.912431	0.996476	1.00046
HILIC POSITIVE ION	12702	M520T313	520.339	312.666	3.50087e+08									LPC(18:2)+H	LPC(18:2)+H	LPC	C26 H51 O7 N1 P1	520.34	B	520.339	-1.35	312.666	520.34	0.02	311.949	0.134597	1.11076	0.0862514	1.10783	0.0201754	1.07007	0.336236	1.0812	0.243291	0.881388	0.208106	0.870679	0.838825	1.03824	0.423892	0.964579	0.0285401	0.838483
HILIC POSITIVE ION	12504	M506T304	506.36	304.458	1.67683e+06									LPC(18:2e)+H	LPC(18:2e)+H	LPC	C26 H53 O6 N1 P1	506.361	B	506.36	-0.09	304.458	506.361	0.09	304.26	0.169879	1.09601	0.299689	1.10289	0.467282	1.03581	0.119173	1.12503	0.81238	0.975323	0.822083	1.02589	0.717283	1.05447	0.648641	0.965712	0.256813	0.910258
HILIC POSITIVE ION	12966	M538T310	538.386	310.139	1.15366e+06									LPC(19:0)+H	LPC(19:0)+H	LPC	C27 H57 O7 N1 P1	538.387	B	538.386	-1.14	310.139	538.387	-0.02	309.9	0.395589	1.06721	0.142955	1.10054	0.101308	1.12494	0.245122	1.12965	0.220418	0.91341	0.506975	0.959279	0.739626	0.857968	0.329314	0.932771	0.00135303	0.784979
HILIC POSITIVE ION	13132	M550T310	550.386	309.537	3.41283e+06									LPC(20:1)+H	LPC(20:1)+H	LPC	C28 H57 O7 N1 P1	550.387	B	550.386	-0.68	309.537	550.387	-0.05	309.18	0.460556	1.07745	0.0667864	1.13235	0.6424	0.956975	0.970062	1.0032	0.955252	1.0047	0.577362	1.02434	0.963206	0.983235	0.607647	0.954623	0.0147272	0.760978
HILIC POSITIVE ION	13385	M570T310	570.355	309.709	8.5478e+06									LPC(22:5)+H	LPC(22:5)+H	LPC	C30 H53 O7 N1 P1	570.355	B	570.355	-0.39	309.709	570.355	-0.13	309.57	0.563107	1.04998	0.104109	1.10547	0.612076	1.04676	0.248243	1.13522	0.955642	0.993955	0.576033	0.976992	0.588085	0.8034	0.344436	0.908187	0.0275825	0.840845
HILIC POSITIVE ION	13988	M614T346	614.33	345.512	123049									LPI(18:2)+NH4	LPI(18:2)+NH4	LPI	C27 H53 O12 N1 P1	614.33	B	614.33	-0.72	345.512	614.33	0.11	345.3	0.365797	0.955626	0.561042	1.03563	0.321354	1.11983	0.174303	1.16751	0.534425	0.952929	0.720746	0.970368	0.113559	1.08557	0.903254	1.01129	0.958176	0.996013
HILIC POSITIVE ION	14520	M679T272	678.507	272.253	341166									PC(28:0)+H	PC(28:0)+H	PC	C36 H73 O8 N1 P1	678.507	C	678.507	-0.39	272.253	678.507	0.35	271.89	0.0149782	1.36081	0.315554	1.14184	0.0142242	1.18461	0.00636158	1.34091	0.0977641	0.906096	0.525216	0.971383	NA	NA	NA	NA	0.00759827	0.747441
HILIC POSITIVE ION	14749	M707T271	706.538	270.56	2.85136e+06									PC(30:0)+H	PC(30:0)+H	PC	C38 H77 O8 N1 P1	706.538	C	706.538	-0.02	270.56	706.538	0.05	270.03	0.0117927	1.43767	0.0661673	1.37955	0.017781	1.43846	0.00320072	1.57727	0.288732	0.855947	0.595	1.06377	NA	NA	0.295793	0.325019	0.026234	0.728786
HILIC POSITIVE ION	14730	M705T270	704.522	269.864	1.0301e+06									PC(30:1)+H	PC(30:1)+H	PC	C38 H75 O8 N1 P1	704.522	C	704.522	-0.16	269.864	704.522	-0.03	269.4	0.00768351	1.27109	0.0527858	1.2099	0.672677	1.02325	0.204884	1.08355	0.575617	0.960032	0.995842	1.00032	NA	NA	NA	NA	0.0156446	0.781606
HILIC POSITIVE ION	14877	M721T270	720.554	269.773	578665									PC(31:0)+H	PC(31:0)+H	PC	C39 H79 O8 N1 P1	720.554	C	720.554	-0.28	269.773	720.554	-0.33	269.4	0.0150444	1.3634	0.0675087	1.31469	0.0269141	1.54434	0.00302326	1.64997	0.0855515	0.77938	0.95501	1.0064	NA	NA	NA	NA	0.0450541	0.749747
HILIC POSITIVE ION	14977	M733T268	732.554	268.32	2.43543e+07									PC(32:1)+H	PC(32:1)+H	PC	C40 H79 O8 N1 P1	732.554	C	732.554	0.23	268.32	732.554	-0.31	268.02	0.0547411	1.23053	0.172689	1.1613	0.504035	1.03467	0.146685	1.09817	0.669273	0.9239	0.440904	0.903706	NA	NA	0.467297	0.406266	0.0480649	0.807612
HILIC POSITIVE ION	14956	M731T269	730.538	268.517	1.26936e+07									PC(32:2)+H	PC(32:2)+H	PC	C40 H77 O8 N1 P1	730.538	C	730.538	0.35	268.517	730.538	0.05	268.2	0.0779531	1.16839	0.163105	1.13448	0.169792	0.909296	0.594776	0.97104	0.890912	0.992948	0.744987	1.03385	NA	NA	NA	0.487817	0.0479077	0.819135
HILIC POSITIVE ION	15046	M745T268	744.554	267.657	6.0691e+06									PC(33:2)+H	PC(33:2)+H	PC	C41 H79 O8 N1 P1	744.554	C	744.554	0.07	267.657	744.554	0.28	267.45	0.13892	1.14767	0.2541	1.10689	0.403607	0.96539	0.499175	1.02558	0.202992	0.821744	0.27379	0.855902	0.238733	1.79137	0.317006	0.231552	0.0528109	0.867904
HILIC POSITIVE ION	15170	M759T267_1	758.569	266.623	795741912									PC(34:2)+H	PC(34:2)+H	PC	C42 H81 O8 N1 P1	758.569	C	758.569	-1.05	266.623	758.569	-0.01	266.28	0.102184	1.18728	0.141905	1.13165	0.0839358	1.09341	0.0595172	1.11949	0.111409	0.783194	0.295031	0.87311	0.388352	1.3784	0.366895	0.244061	0.124374	0.878147
HILIC POSITIVE ION	15156	M757T267	756.554	266.562	3.56853e+07									PC(34:3)+H	PC(34:3)+H	PC	C42 H79 O8 N1 P1	756.554	C	756.554	-0.19	266.562	756.554	0.12	266.37	0.218445	1.09729	0.237087	1.06284	0.14954	0.895059	0.65871	0.963519	1.86221e-05	0.672767	0.0623669	0.777316	0.42163	1.43392	0.367704	0.259574	0.0886084	0.849618
HILIC POSITIVE ION	15034	M743T263	742.575	263.167	1.19839e+07									PC(34:3e)+H	PC(34:3e)+H	PC	C42 H81 O7 N1 P1	742.575	C	742.575	0	263.167	742.575	0.11	263.01	0.105908	1.16852	0.202833	1.10521	0.0727732	1.11284	0.0415874	1.16263	0.301947	0.745898	0.766408	0.92413	0.983498	1.00968	0.364218	0.197527	0.037892	0.769764
HILIC POSITIVE ION	15142	M755T264	754.539	263.803	4.42873e+06									PC(34:4)+H	PC(34:4)+H	PC	C42 H77 O8 N1 P1	754.538	C	754.539	0.72	263.803	754.538	-0.12	263.61	0.313618	1.08064	0.272458	1.08589	0.00969881	0.813378	0.000543599	0.852707	7.35336e-06	0.452532	1.8814e-05	0.475129	NA	NA	NA	NA	0.0145185	0.803076
HILIC POSITIVE ION	15377	M787T265	786.599	264.801	2.03738e+08									PC(36:2)+H	PC(36:2)+H	PC	C44 H85 O8 N1 P1	786.601	C	786.599	-2.51	264.801	786.601	-0.13	264.21	0.0211256	1.27152	0.0355885	1.19306	0.0311198	1.29545	0.0136395	1.26543	0.887993	1.03854	0.839266	1.06612	0.238376	1.52779	0.376622	0.190256	0.0838441	0.81117
HILIC POSITIVE ION	15366	M785T264	784.583	264.372	2.8969e+08									PC(36:3)+H	PC(36:3)+H	PC	C44 H83 O8 N1 P1	784.585	C	784.583	-2.38	264.372	784.585	-0.17	263.94	0.273738	1.14087	0.193477	1.17129	0.0614047	0.91994	0.986181	0.999378	0.00103688	0.863412	0.892444	0.993291	0.304209	1.43228	0.378021	0.206462	0.0525931	0.788092
HILIC POSITIVE ION	15358	M783T262	782.569	262.134	5.71285e+08									PC(36:4)+H	PC(36:4)+H	PC	C44 H81 O8 N1 P1	782.569	C	782.569	-1.04	262.134	782.567	-2.84	261.45	0.20271	1.13589	0.293929	1.08513	0.667536	1.02669	0.0679747	1.05752	0.314246	0.864595	0.681749	1.0469	0.351306	1.38365	0.373516	0.19365	0.0539575	0.811765
HILIC POSITIVE ION	15242	M769T262	768.59	262.123	3.18815e+07									PC(36:4e)+H	PC(36:4e)+H	PC	C44 H83 O7 N1 P1	768.59	C	768.59	-0.44	262.123	768.59	0.24	261.51	0.150924	1.16365	0.122188	1.12386	0.850355	1.00896	0.322048	1.09582	0.0839769	0.812862	0.387258	0.906694	0.305794	1.55041	0.376311	0.162897	0.0522137	0.78987
HILIC POSITIVE ION	15348	M781T262	780.554	262.476	4.57274e+07									PC(36:5)+H	PC(36:5)+H	PC	C44 H79 O8 N1 P1	780.554	C	780.554	-0.2	262.476	780.554	-0.02	262.29	0.382265	1.07665	0.479732	1.05184	0.17441	0.899517	0.159389	0.954857	0.142987	0.783438	0.35937	0.838477	NA	0.514737	NA	0.0796664	0.0363205	0.816955
HILIC POSITIVE ION	15228	M767T259	766.574	258.601	3.5725e+07									PC(36:5e)+H	PC(36:5e)+H	PC	C44 H81 O7 N1 P1	766.575	C	766.574	-0.47	258.601	766.575	0.25	258.33	0.00942521	1.34662	0.0278679	1.21267	0.307177	1.07908	0.106598	1.10985	0.00653183	0.905728	0.639053	1.0818	0.599329	1.3629	0.382635	0.188705	0.06869	0.753084
HILIC POSITIVE ION	15216	M765T259	764.559	258.936	2.59312e+06									PC(36:6e)+H	PC(36:6e)+H	PC	C44 H79 O7 N1 P1	764.559	C	764.559	-0.06	258.936	764.559	0.23	258.9	0.0338493	1.2452	0.0493471	1.15887	0.745087	0.971543	0.942804	0.995973	0.844339	1.03272	0.926156	0.986573	NA	NA	NA	NA	0.0321787	0.730955
HILIC POSITIVE ION	15349	M781T258	780.59	257.992	2.19268e+06									PC(37:5e)+H	PC(37:5e)+H	PC	C45 H83 O7 N1 P1	780.59	C	780.59	-0.58	257.992	780.59	0.07	257.73	0.00637602	1.3998	0.0309514	1.24095	0.132107	1.14008	0.0755364	1.17925	0.000423821	0.692959	0.0432475	0.790905	NA	NA	NA	NA	0.08823	0.774868
HILIC POSITIVE ION	15534	M811T260	810.599	260.41	2.10458e+08									PC(38:4)+H	PC(38:4)+H	PC	C46 H85 O8 N1 P1	810.601	C	810.599	-2.07	260.41	810.6	-0.32	259.65	0.0379698	1.28473	0.0344444	1.18867	0.00293866	1.267	0.0031485	1.26855	0.412456	1.13998	0.335705	1.37576	0.312729	1.37999	0.382249	0.151196	0.0802432	0.759137
HILIC POSITIVE ION	15438	M795T260	794.605	259.903	3.39549e+07									PC(38:5e)+H	PC(38:5e)+H	PC	C46 H85 O7 N1 P1	794.606	C	794.605	-0.97	259.903	794.606	0.04	259.32	0.0199299	1.27498	0.0148676	1.20621	0.0187957	1.17268	0.019302	1.24186	0.00797289	0.812279	0.403367	0.951828	0.185413	1.66965	0.385214	0.135707	0.0645499	0.753431
HILIC POSITIVE ION	15519	M807T261	806.568	260.83	1.23635e+08									PC(38:6)+H	PC(38:6)+H	PC	C46 H81 O8 N1 P1	806.569	C	806.568	-1.28	260.83	806.567	-2.72	260.43	0.0898152	1.15821	0.128382	1.12901	0.768567	1.01929	0.00807601	1.04584	0.379276	0.914176	0.205753	0.906791	0.320977	1.38777	0.384516	0.178216	0.0717237	0.779445
HILIC POSITIVE ION	15420	M793T258	792.589	257.662	1.50414e+07									PC(38:6e)+H	PC(38:6e)+H	PC	C46 H83 O7 N1 P1	792.59	C	792.589	-0.95	257.662	792.59	0.18	258.45	0.0170818	1.29918	0.0629313	1.20123	0.206976	1.08167	0.103479	1.09764	0.142624	0.823287	0.552851	1.29017	NA	NA	NA	NA	0.470202	0.750466
HILIC POSITIVE ION	15504	M805T262	804.552	261.638	4.38189e+06									PC(38:7)+H	PC(38:7)+H	PC	C46 H79 O8 N1 P1	804.554	C	804.552	-2.03	261.638	804.554	-0.18	260.91	0.912595	0.992809	0.544676	0.968928	0.555868	0.960806	0.28111	0.982435	NA	1.00755	NA	1.07452	0.688722	1.18232	0.404975	0.216817	0.0660084	0.906065
HILIC POSITIVE ION	15399	M791T257	790.574	257.372	4.3055e+06									PC(38:7e)+H	PC(38:7e)+H	PC	C46 H81 O7 N1 P1	790.575	C	790.574	-0.7	257.372	790.575	0.17	257.28	0.00425304	1.36075	0.0487084	1.22877	0.752849	1.02271	0.200455	1.07103	0.0135687	0.872592	0.536858	1.07993	NA	NA	NA	NA	0.0410833	0.733025
HILIC POSITIVE ION	15673	M837T260	836.613	260.171	1.68068e+07									PC(40:5)+H	PC(40:5)+H	PC	C48 H87 O8 N1 P1	836.616	C	836.613	-3.83	260.171	836.616	-0.37	259.65	0.0138352	1.33474	0.0534351	1.21715	0.0041746	1.25389	0.0059385	1.24598	0.793018	0.926489	0.553329	0.900109	0.349598	1.71161	0.381548	0.0859874	0.103509	0.764051
HILIC POSITIVE ION	15658	M835T259	834.599	259.266	3.04302e+07									PC(40:6)+H	PC(40:6)+H	PC	C48 H85 O8 N1 P1	834.601	C	834.599	-1.67	259.266	834.601	-0.09	258.96	0.0145331	1.3442	0.0229689	1.21708	0.0626885	1.14847	0.0414093	1.15726	0.170573	0.822987	0.193555	0.856484	0.225424	1.55684	0.382778	0.112352	0.0914297	0.74432
HILIC POSITIVE ION	15590	M821T259	820.62	259.375	4.6811e+06									PC(40:6e)+H	PC(40:6e)+H	PC	C48 H87 O7 N1 P1	820.621	C	820.62	-1.72	259.375	820.622	0.11	259.02	0.00677576	1.33037	0.0137245	1.22746	0.0464757	1.14923	0.0345091	1.16878	0.195973	0.858356	0.28527	0.916422	NA	NA	NA	NA	0.0686112	0.723149
HILIC POSITIVE ION	15640	M831T258	830.568	257.879	5.40031e+06									PC(40:8)+H	PC(40:8)+H	PC	C48 H81 O8 N1 P1	830.569	C	830.568	-1.21	257.879	830.569	-0.06	258.24	0.0161126	1.20562	0.125962	1.13114	0.394185	0.925832	0.402865	0.966463	0.207383	0.797007	0.90616	0.976598	NA	NA	NA	NA	0.0395122	0.837709
HILIC POSITIVE ION	15563	M817T256	816.589	255.794	1.18714e+06									PC(40:8e)+H	PC(40:8e)+H	PC	C48 H83 O7 N1 P1	816.59	C	816.589	-1.66	255.794	816.59	0.15	255.45	0.000268555	1.30984	0.0576954	1.16968	0.0327158	1.1452	0.0430223	1.16231	0.411105	1.13083	0.217735	1.09435	NA	NA	NA	NA	NA	0.672101
HILIC POSITIVE ION	15757	M855T255	854.568	255.315	778082									PC(42:10)+H	PC(42:10)+H	PC	C50 H81 O8 N1 P1	854.569	C	854.568	-1.98	255.315	854.57	0.08	254.85	0.0114537	1.24913	0.156489	1.13917	0.681754	0.971142	0.145423	1.06348	0.503709	0.912299	0.141518	0.838423	NA	NA	NA	NA	0.107155	0.542099
HILIC POSITIVE ION	15722	M849T259	848.652	258.559	895913									PC(42:6e)+H	PC(42:6e)+H	PC	C50 H91 O7 N1 P1	848.653	C	848.652	-1.07	258.559	848.653	-0.27	258.57	0.0156526	1.47161	0.0106561	1.24393	0.0372469	1.54119	0.0371792	1.47654	0.199034	1.11404	0.0265695	1.28324	NA	NA	NA	NA	0.13185	0.761961
HILIC POSITIVE ION	15785	M859T257	858.599	257.045	763305									PC(42:8)+H	PC(42:8)+H	PC	C50 H85 O8 N1 P1	858.601	C	858.599	-2.55	257.045	858.601	-0.21	256.83	0.0100534	1.35367	0.0700252	1.21024	0.709689	0.969941	0.657775	1.02728	0.838147	1.01131	0.209427	0.89446	NA	NA	NA	NA	NA	NA
HILIC POSITIVE ION	15019	M741T212	740.522	211.848	2.04181e+06									PE(16:0_20:4)+H	PE(36:4)+H	PE	C41 H75 O8 N1 P1	740.522	B	740.522	-0.65	211.848	740.523	0.06	211.59	0.0136793	1.32547	0.135087	1.16745	0.0216002	1.902	0.0426802	1.66075	0.31301	0.871602	0.636211	1.05635	NA	NA	NA	NA	0.0034738	0.903177
HILIC POSITIVE ION	14674	M701T199	700.527	198.679	363233									PE(16:0p_18:2)+H	PE(34:2p)+H	PE	C39 H75 O7 N1 P1	700.528	A	700.527	-1.17	198.679	700.528	0.03	197.04	NA	NA	NA	NA	NA	NA	NA	NA	NA	NA	NA	NA	NA	NA	NA	NA	NA	0.97915
HILIC POSITIVE ION	14917	M725T181	724.527	181.226	2.25637e+06									PE(16:0p_20:4)+H	PE(36:4p)+H	PE	C41 H75 O7 N1 P1	724.528	A	724.527	-0.81	181.226	724.528	0.06	180.27	NA	NA	NA	NA	NA	NA	NA	NA	NA	NA	NA	NA	NA	NA	NA	NA	0.230711	0.788429
HILIC POSITIVE ION	15081	M749T196	748.527	196.171	2.85202e+06									PE(16:0p_22:6)+H	PE(38:6p)+H	PE	C43 H75 O7 N1 P1	748.528	A	748.527	-1.13	196.171	748.528	0.34	195.69	0.100906	1.23603	NA	1.06433	0.0674314	1.83214	0.0231123	1.67995	0.786853	1.03425	0.025914	1.22423	NA	NA	NA	NA	NA	NA
HILIC POSITIVE ION	15239	M769T208	768.553	207.921	2.73596e+06									PE(18:0_20:4)+H	PE(38:4)+H	PE	C43 H79 O8 N1 P1	768.554	B	768.553	-1.2	207.921	768.554	-0.1	207.78	NA	1.2945	NA	1.03056	NA	1.68365	NA	1.70337	0.509502	0.919203	0.128014	1.22689	NA	NA	NA	NA	0.0696616	0.70067
HILIC POSITIVE ION	15240	M769T193	768.553	192.894	1.23706e+06									PE(18:0_20:4)+H	PE(38:4)+H	PE	C43 H79 O8 N1 P1	768.554	B	768.553	-1.37	192.894	768.554	-0.03	191.01	NA	NA	NA	NA	NA	NA	NA	NA	NA	NA	NA	NA	NA	NA	NA	NA	0.160673	0.723252
HILIC POSITIVE ION	12170	M482T299	482.324	299.227	4.25048e+06									PE(18:0e)+H	PE(18:0e)+H	PE	C23 H49 O7 N1 P1	482.324	C	482.324	0.23	299.227	482.324	0.01	299.13	0.291391	1.13168	0.138524	1.15149	0.88339	1.01165	0.0350768	1.12656	0.239579	0.951664	0.270859	0.962751	NA	1.93439	0.342023	0.925626	0.0014178	0.813878
HILIC POSITIVE ION	15215	M765T195	764.521	195.372	1.77412e+06									PE(18:1_20:5)+H	PE(38:6)+H	PE	C43 H75 O8 N1 P1	764.522	B	764.521	-1.4	195.372	764.523	0.06	193.98	NA	NA	NA	NA	NA	NA	NA	NA	NA	NA	NA	NA	NA	NA	NA	NA	0.683736	0.882843
HILIC POSITIVE ION	15097	M751T194	750.542	193.769	5.49547e+06									PE(18:1p_20:4)+H	PE(38:5p)+H	PE	C43 H77 O7 N1 P1	750.543	A	750.542	-1.12	193.769	750.543	0.03	192.72	NA	1.30396	0.0117014	1.38015	0.0133381	1.69748	0.0308167	1.41334	0.954286	0.990381	0.6285	1.08471	NA	NA	NA	NA	0.239328	0.769953
HILIC POSITIVE ION	15098	M751T174	750.542	174.18	2.96428e+06									PE(18:1p_20:4)+H	PE(38:5p)+H	PE	C43 H77 O7 N1 P1	750.543	B	750.542	-1.85	174.18	750.543	0.01	172.86	NA	NA	NA	NA	NA	0.472557	NA	0.600724	NA	NA	NA	NA	NA	NA	NA	NA	0.0398176	0.677256
HILIC POSITIVE ION	12110	M478T292	478.293	291.97	640138									PE(18:2e)+H	PE(18:2e)+H	PE	C23 H45 O7 N1 P1	478.293	C	478.293	0.02	291.97	478.293	0.07	291.84	0.248009	1.16701	0.210557	1.07916	NA	1.24389	0.016668	1.22469	0.800974	1.01817	0.934858	1.00456	NA	NA	NA	NA	NA	NA
HILIC POSITIVE ION	12444	M502T297	502.293	297.167	5.78262e+06									PE(20:4e)+H	PE(20:4e)+H	PE	C25 H45 O7 N1 P1	502.293	C	502.293	-0.29	297.167	502.293	0.04	296.91	0.0987012	1.09152	0.303563	1.04237	0.546853	1.0385	0.0752013	1.13302	0.532496	0.949164	0.145476	0.881236	0.693577	1.05641	0.194034	0.919886	0.0125781	0.84192
HILIC POSITIVE ION	14832	M717T221	716.522	221.265	1.45068e+06									PE(34:2)+H	PE(34:2)+H	PE	C39 H75 O8 N1 P1	716.522	C	716.522	-0.85	221.265	716.522	-0.09	221.4	0.579855	0.853457	0.254714	0.744426	0.000108532	2.21035	0.00412462	1.98491	0.0334801	0.830983	0.864244	1.01448	NA	NA	NA	NA	NA	0.787654
HILIC POSITIVE ION	14834	M717T212	716.522	212.187	536373									PE(34:2)+H	PE(34:2)+H	PE	C39 H75 O8 N1 P1	716.522	C	716.522	-1.09	212.187	716.522	-0.06	210.48	NA	NA	NA	NA	NA	NA	NA	NA	NA	NA	NA	NA	NA	NA	NA	NA	0.157944	0.583768
HILIC POSITIVE ION	15214	M765T210	764.522	209.538	2.36192e+06									PE(38:6)+H	PE(38:6)+H	PE	C43 H75 O8 N1 P1	764.522	C	764.522	-1.13	209.538	764.523	0.04	209.25	NA	1.3497	NA	1.16055	NA	1.49665	NA	1.48328	0.811958	0.96906	0.273377	1.11812	NA	NA	NA	NA	NA	0.783779
HILIC POSITIVE ION	14319	M648T303	647.512	303.129	632728									SM(d30:1)+H	SM(d30:1)+H	SM	C35 H72 O6 N2 P1	647.512	C	647.512	-0.45	303.129	647.512	0.02	302.73	0.0874001	1.2205	0.063121	1.31037	0.00175912	1.32692	0.0163401	1.44574	0.855735	1.00917	0.0703848	1.07412	0.99703	1.00075	0.203303	0.780563	0.0841555	0.81586
HILIC POSITIVE ION	14497	M676T301	675.543	301.489	8.8352e+06									SM(d32:1)+H	SM(d32:1)+H	SM	C37 H76 O6 N2 P1	675.544	C	675.543	-0.39	301.489	675.544	0.1	301.08	0.113735	1.29593	0.137016	1.31105	0.00295003	1.64764	0.000703738	1.68861	0.429749	0.961859	0.23451	1.05308	0.836121	1.07183	0.0590121	0.737407	0.00302334	0.768141
HILIC POSITIVE ION	14480	M674T302	673.528	301.721	1.56269e+06									SM(d32:2)+H	SM(d32:2)+H	SM	C37 H74 O6 N2 P1	673.528	C	673.528	0.03	301.721	673.528	0.08	301.44	0.10768	1.24795	0.174191	1.21658	0.000770848	1.17677	0.0110498	1.20103	0.703786	0.978806	0.365367	1.03031	0.945716	1.02332	0.207741	0.840132	0.000767027	0.768222
HILIC POSITIVE ION	14613	M690T301	689.559	300.798	2.65035e+06									SM(d33:1)+H	SM(d33:1)+H	SM	C38 H78 O6 N2 P1	689.559	C	689.559	-0.07	300.798	689.559	0.22	300.36	0.149602	1.28179	0.127745	1.30545	0.00313954	1.99452	0.000395611	2.01756	0.164901	0.90612	0.409598	1.04017	0.915983	1.0411	0.0461312	0.714259	0.00470506	0.764158
HILIC POSITIVE ION	14688	M702T300	701.559	300.175	2.54002e+07									SM(d34:2)+H	SM(d34:2)+H	SM	C39 H78 O6 N2 P1	701.559	C	701.559	-0.42	300.175	701.559	0.01	299.91	0.0919652	1.37871	0.0979781	1.2875	0.0259945	1.22271	0.00685861	1.29057	0.185112	0.952692	0.403266	0.967367	0.873875	1.06373	0.12103	0.697746	0.00565147	0.749261
HILIC POSITIVE ION	14826	M716T299	715.574	299.233	427797									SM(d35:2)+H	SM(d35:2)+H	SM	C40 H80 O6 N2 P1	715.575	C	715.574	-1.32	299.233	715.575	-0.15	299.13	0.0795757	1.44132	0.0413193	1.30178	0.00284641	1.45691	0.00148727	1.58413	0.352389	0.930546	0.441919	0.975317	NA	NA	0.355443	0.663904	0.0253014	0.767175
HILIC POSITIVE ION	14950	M730T299	729.59	298.766	7.30797e+06									SM(d36:2)+H	SM(d36:2)+H	SM	C41 H82 O6 N2 P1	729.591	C	729.59	-0.87	298.766	729.59	-0.04	298.26	0.0800136	1.39425	0.0230755	1.28608	0.00194313	1.84657	0.000923546	1.94231	0.360391	0.917869	0.650886	0.975186	0.991421	0.995761	0.151535	0.6306	0.0566396	0.757444
HILIC POSITIVE ION	14937	M728T298	727.575	298.144	1.31783e+06									SM(d36:3)+H	SM(d36:3)+H	SM	C41 H80 O6 N2 P1	727.575	C	727.575	-0.48	298.144	727.575	0.03	297.78	0.0931806	1.36811	0.0389504	1.20165	0.0188994	1.29745	0.00489752	1.37179	0.934136	0.991842	0.561592	0.953442	NA	NA	0.198405	0.594235	0.0324531	0.734569
HILIC POSITIVE ION	15371	M786T296	785.652	296.342	2.89191e+06									SM(d40:2)+H	SM(d40:2)+H	SM	C45 H90 O6 N2 P1	785.653	C	785.652	-1.22	296.342	785.653	-0.21	295.74	0.140594	1.3541	0.0573664	1.23222	0.0133482	5.19619	0.000608067	3.84515	0.723681	0.938859	0.439649	1.1181	0.501607	1.44679	0.278099	0.460817	0.138777	0.716515
HILIC POSITIVE ION	15539	M812T295	811.667	295.443	3.50861e+06									SM(d42:3)+H	SM(d42:3)+H	SM	C47 H92 O6 N2 P1	811.669	C	811.667	-1.59	295.443	811.669	-0.18	294.72	0.156708	1.43564	0.126806	1.24967	0.0119803	4.21714	0.000956725	3.36744	0.901287	0.98045	0.193607	1.17935	0.0676885	2.7227	0.331883	0.422026	0.199803	0.733696
HILIC POSITIVE ION	15531	M810T295	809.652	295.459	980188									SM(d42:4)+H	SM(d42:4)+H	SM	C47 H90 O6 N2 P1	809.653	C	809.652	-1.37	295.459	809.653	-0.09	295.11	0.138872	1.50233	0.0927674	1.29113	0.0092035	2.51236	0.00183852	2.30463	0.780294	0.961728	0.370033	1.09154	NA	NA	0.44642	0.291917	0.13828	0.702487
HILIC NEGATIVE ION	8998	M583T27	583.256	26.9728	286902	8998	Bilirubin	C33H36N4O6	26.7	583.256	[M-H]-1	-1	76.3													0.19905	1.16612	0.30853	1.11667	0.0528433	1.32994	0.0634219	1.18834	0.885897	1.02142	0.559871	0.945484	0.0588398	0.66148	0.490024	0.895385	0.408247	0.900865
HILIC NEGATIVE ION	8532	M464T308	464.301	308.053	67301.8	8532	Glycocholic acid	C26H43NO6	307.68	464.302	[M-H]-1	-1	77.1													0.512848	0.976166	0.0113079	1.14412	0.28429	0.865398	0.941665	1.00992	0.238859	0.923727	0.921314	0.993817	0.450527	0.951422	0.151812	1.14708	0.260801	0.930492
HILIC NEGATIVE ION	8806	M524T306	524.336	306.271	41528.2									CerP(d24:0)+HCOO	CerP(d24:0)+HCOO	CerP	C25 H51 O8 N1 P1	524.336	D	524.336	-0.43	306.271	524.336	1.22	305.97	0.0949608	0.838483	0.324015	1.10281	0.107416	0.884956	0.416029	1.06253	0.0736686	0.937552	0.307921	0.954208	NA	NA	0.970832	0.987885	0.132604	0.902251
HILIC NEGATIVE ION	8069	M409T295	409.236	294.9	30495.4									LPA(16:0)-H	LPA(16:0)-H	LPA	C19 H38 O7 N0 P1	409.236	B	409.236	-0.24	294.9	409.237	1.16	294.84	0.282687	1.1741	0.134769	1.60808	0.600856	1.10364	0.101771	1.22418	0.385182	1.08006	0.359942	1.08176	NA	1.46753	0.0696765	1.41552	0.135501	0.765935
HILIC NEGATIVE ION	8490	M457T287	457.236	286.593	44682									LPA(20:4)-H	LPA(20:4)-H	LPA	C23 H38 O7 N0 P1	457.236	A	457.236	0.22	286.593	457.238	3.79	282.36	0.0341197	0.784051	0.501709	0.938878	0.00692233	0.657098	0.0451363	0.779212	0.47319	0.901879	0.997071	0.999482	0.279116	0.920795	0.392717	1.08783	0.096245	0.845795
HILIC NEGATIVE ION	8859	M540T314	540.33	313.597	4.11841e+06									LPC(16:0)+HCOO	LPC(16:0)+HCOO	LPC	C25 H51 O9 N1 P1	540.331	A	540.33	-0.43	313.597	540.331	1.38	312.908	0.00297476	0.790684	0.107706	0.930443	0.0123896	0.857683	0.144233	1.09918	0.368834	0.967367	0.709666	0.974647	0.419673	0.882889	0.607714	1.05765	0.248392	0.863146
HILIC NEGATIVE ION	8950	M566T312	566.347	311.574	721882									LPC(18:1)+HCOO	LPC(18:1)+HCOO	LPC	C27 H53 O9 N1 P1	566.346	A	566.347	0.47	311.574	566.347	1.64	310.957	0.0032044	0.810149	0.263032	1.04164	0.00326712	1.08042	0.000824774	1.08641	0.166458	0.868529	0.525503	0.945582	0.99157	1.00283	0.0950363	0.813342	0.0317852	0.802763
HILIC NEGATIVE ION	8946	M564T313	564.331	312.594	1.09977e+06									LPC(18:2)+HCOO	LPC(18:2)+HCOO	LPC	C27 H51 O9 N1 P1	564.331	A	564.331	0.09	312.594	564.332	1.61	312.63	0.00851491	0.748955	0.616023	0.954473	0.261633	1.08365	0.18274	1.15876	0.887326	0.993394	0.3777	0.961133	0.954708	0.989562	0.877526	1.01326	0.211575	0.889512
HILIC NEGATIVE ION	9414	M777T269	776.546	268.562	80298									PC(16:0_16:1)+HCOO	PC(32:1)+HCOO	PC	C41 H79 O10 N1 P1	776.545	A	776.546	1.53	268.562	776.547	3.17	268.2	0.661355	1.02303	0.280022	1.05605	0.120832	1.03323	0.187651	1.06253	0.0599503	0.882308	0.315774	1.0521	NA	NA	NA	NA	0.0610283	0.704087
HILIC NEGATIVE ION	9494	M803T267	802.561	266.881	2.50442e+06									PC(16:0_18:2)+HCOO	PC(34:2)+HCOO	PC	C43 H81 O10 N1 P1	802.56	A	802.561	1.27	266.881	802.563	2.82	266.851	0.744217	0.98501	0.39547	1.07094	0.0948342	1.08614	0.0254019	1.13339	0.363192	0.960218	0.120759	1.20227	0.619696	1.20716	0.378518	0.282081	0.083604	0.783115
HILIC NEGATIVE ION	9547	M827T262	826.561	262.378	1.9282e+06									PC(16:0_20:4)+HCOO	PC(36:4)+HCOO	PC	C45 H81 O10 N1 P1	826.56	A	826.561	1.31	262.378	826.562	1.8	261.63	0.774532	0.977096	0.431197	1.05702	0.94676	1.00237	0.945981	0.997227	0.932212	1.00564	0.518748	1.06811	NA	1.59306	0.390796	0.212593	0.0300074	0.799352
HILIC NEGATIVE ION	9543	M825T263	824.546	262.902	143028									PC(16:0_20:5)+HCOO	PC(36:5)+HCOO	PC	C45 H79 O10 N1 P1	824.545	B	824.546	1.44	262.902	824.547	3.22	262.62	0.689108	0.967585	0.686468	1.01855	0.129755	0.889018	0.174124	0.902366	0.0755029	0.979011	0.933252	1.00155	NA	NA	NA	NA	0.0774242	0.803251
HILIC NEGATIVE ION	9644	M851T261	850.562	261.137	477607									PC(16:0_22:6)+HCOO	PC(38:6)+HCOO	PC	C47 H81 O10 N1 P1	850.56	A	850.562	1.43	261.137	850.562	2.3	260.76	0.378795	0.951738	0.480436	1.03787	0.16705	1.07264	0.0475322	1.08091	0.708726	0.958532	0.588798	1.05135	NA	NA	NA	NA	0.0357249	0.762951
HILIC NEGATIVE ION	9509	M811T258	810.567	258.492	135091									PC(16:1e_20:4)+HCOO	PC(36:5e)+HCOO	PC	C45 H81 O9 N1 P1	810.565	B	810.567	1.63	258.492	810.567	2.33	258.21	0.643842	1.02652	0.06429	1.12989	0.845718	0.990733	0.131031	1.0632	0.332278	0.932581	0.0851543	1.04934	NA	NA	NA	NA	0.0387593	0.724151
HILIC NEGATIVE ION	9521	M817T266	816.576	265.79	31357.1									PC(17:0_18:2)+HCOO	PC(35:2)+HCOO	PC	C44 H83 O10 N1 P1	816.576	A	816.576	0.55	265.79	816.578	2.53	265.5	0.405109	0.939684	0.789639	1.03714	0.0288534	1.15733	0.00213561	1.20143	0.0174077	0.888378	0.243361	1.0808	NA	NA	NA	NA	0.41668	0.879177
HILIC NEGATIVE ION	9653	M855T260	854.593	260.432	783814									PC(18:0_20:4)+HCOO	PC(38:4)+HCOO	PC	C47 H85 O10 N1 P1	854.592	A	854.593	1.14	260.432	854.593	1.84	260.04	0.537013	1.04498	0.201154	1.09563	0.00118625	1.34515	0.00185327	1.33241	0.0807348	0.901529	0.14901	1.06056	NA	NA	NA	NA	0.0543358	0.735116
HILIC NEGATIVE ION	9650	M853T261	852.576	261.051	509230									PC(18:1_20:4)+HCOO	PC(38:5)+HCOO	PC	C47 H83 O10 N1 P1	852.576	A	852.576	0.55	261.051	852.578	1.76	260.1	0.957198	1.00334	0.243449	1.07829	0.0691534	1.07377	0.0435246	1.08388	0.250709	0.843093	0.523033	0.92165	NA	NA	NA	NA	0.0345115	0.747316
HILIC NEGATIVE ION	9582	M837T257	836.582	257.217	61254.1									PC(18:2e_20:4)+HCOO	PC(38:6e)+HCOO	PC	C47 H83 O9 N1 P1	836.581	B	836.582	1.57	257.217	836.582	1.5	256.44	0.649119	1.03231	0.155456	1.13504	0.0116455	0.909822	0.018252	1.05129	0.0652661	0.906051	0.355266	1.07268	NA	NA	NA	NA	NA	0.766268
HILIC NEGATIVE ION	9559	M834T306	833.519	305.534	37201.3									PI(16:0_18:2)-H	PI(34:2)-H	PI	C43 H78 O13 N0 P1	833.519	A	833.519	0.99	305.534	833.52	1.23	305.04	0.0499945	1.44817	0.187078	1.49414	0.0657724	1.56783	0.00189085	1.77746	0.635955	0.94691	0.0651982	1.24858	NA	NA	NA	NA	0.189955	0.889471
HILIC NEGATIVE ION	9656	M858T302	857.519	301.654	50521.2									PI(16:0_20:4)-H	PI(36:4)-H	PI	C45 H78 O13 N0 P1	857.519	A	857.519	0.95	301.654	857.52	2.14	301.23	0.510565	1.07089	0.415202	1.13987	0.0498326	1.1938	0.00203557	1.41643	0.00761703	0.818533	0.126568	1.0438	NA	NA	NA	0.2366	0.0892172	0.78567
HILIC NEGATIVE ION	9743	M886T300	885.551	300.075	314747									PI(18:0_20:4)-H	PI(38:4)-H	PI	C47 H82 O13 N0 P1	885.55	B	885.551	1.35	300.075	885.552	2.3	299.91	0.377409	1.10948	0.0360784	1.24565	0.0274321	1.41385	0.000222023	1.66546	0.471549	0.940721	0.316085	1.11071	0.478784	1.26879	0.425809	0.47688	0.0776582	0.835704
HILIC NEGATIVE ION	9097	M619T343	619.289	342.776	37817.3									PI(20:4e)-H	PI(20:4e)-H	PI	C29 H48 O12 N0 P1	619.289	C	619.289	0.63	342.776	619.29	2.31	342.63	0.0695904	0.796601	0.0855941	0.914781	0.0957876	0.903354	0.0609284	0.917619	0.772002	0.951655	0.868948	0.975184	0.99492	1.00034	0.208149	1.13425	0.986282	0.997802
HILIC NEGATIVE ION	9483	M801T267	800.546	266.817	105377									PS(37:2)-H	PS(37:2)-H	PS	C43 H79 O10 N1 P1	800.545	C	800.546	1.37	266.817	800.547	2.51	266.85	0.162802	0.941602	0.944147	0.995378	0.21308	0.936126	0.580727	1.0246	0.707024	0.977383	0.298228	1.0459	NA	NA	NA	NA	0.0507321	0.793578
HILIC NEGATIVE ION	9552	M829T264	828.576	264.315	985477									PS(39:2)-H	PS(39:2)-H	PS	C45 H83 O10 N1 P1	828.576	C	828.576	-0.31	264.315	828.577	0.62	264.15	0.702768	1.02571	0.504638	1.05001	0.0105169	0.942212	0.396245	0.970862	0.0472528	0.93797	0.0860141	1.06381	NA	NA	NA	0.12516	0.0174919	0.791935

## Sheet: Table_S2D_PLASMA_C18_LIPIDS
TABLE S2D: PLASMA UHPLC-MS C18 LIPID ASSAY: COMPOUNDS IDENTIFIED USING MS/MS DATABASE MATCHES: VARIATIONS CAUSED BY INCUBATIONS DURING EXTRACTIONS
INITIAL FILTERING - peaks retained:
- where present in <70% QC samples; - where QC RSD<30%, - where blank filter >5%																		LEGEND
- XCMS minfrac =0.2																		unpaired ttest			fold change >15%
- peaks with a putative ID																		p<0.05			fold change >30%
- the highest peak intensity ionform for each putative ID																		p<0.01			fold change <15%
MS/MS Identification																					fold change <30%
- QC MS/MS files were submitted to Thermo Fisher Lipid Search to annotate lipid compounds based on MS/MS spectral matches to databases.
	XCMS					LIPID SEARCH ID (MS/MS)												100% ACN				25:75 IPA:ACN				50:50 IPA:ACN				75:25 IPA:ACN				100% IPA				CHCl3:MeOH:H2O		DCM:MeOH:H2O		MTBE:MeOH:H2O
Ion mode	IDX	name	MZ	RT	MPA	LipidIon	LipidGroup	Class	IonFormula	theor_mass	Grade	XCMS_mz	XCMS_mz_ppm	XCMS_rt	lipidsearch_mz	lipidsearch_mz_ppm	lipidsearch_rt	60 min at -20oC incubation/no incubation		60 min on ice incubation/no incubation		60 min at -20oC incubation/no incubation		60 min on ice incubation/no incubation		60 min at -20oC incubation/no incubation		60 min on ice incubation/no incubation		60 min at -20oC incubation/no incubation		60 min on ice incubation/no incubation		60 min at -20oC incubation/no incubation		60 min on ice incubation/no incubation		20 min biphase partition/1 min partition		20 min biphase partition/1 min partition		20 min biphase partition/1 min partition
																		p value	fold change	p value	fold change	p value	fold change	p value	fold change	p value	fold change	p value	fold change	p value	fold change	p value	fold change	p value	fold change	p value	fold change	p value	fold change	p value	fold change	p value	fold change
POSITIVE ION LIPIDS	2266	M316T46	316.248	45.9596	2.94513e+07	AcCa(10:0)+H	AcCa(10:0)+H	AcCa	C17 H34 O4 N1	316.248	A	316.248	-1.15	45.9596	316.248	-0.11	45.6	0.483697	1.02858	0.663142	1.01694	0.541935	0.979663	0.213139	0.95735	0.931452	1.00317	0.514665	1.02658	0.0214129	0.937203	0.728517	0.981795	0.686731	0.978224	0.132359	0.932147	0.508193	1.06859	0.164108	1.11678	0.463791	1.2618
POSITIVE ION LIPIDS	2232	M314T42	314.232	42.2104	3.11477e+07	AcCa(10:1)+H	AcCa(10:1)+H	AcCa	C17 H32 O4 N1	314.233	A	314.232	-1.38	42.2104	314.233	-0.15	41.85	0.0438491	1.07888	0.762476	1.00712	0.814065	0.994231	0.859394	0.996488	0.303805	1.04602	0.0801411	1.08981	0.0127352	0.922704	0.664995	0.975381	0.87599	0.992184	0.0858683	0.916296	0.595389	1.05441	0.205138	1.13731	0.440233	1.33241
POSITIVE ION LIPIDS	2670	M344T60	344.279	59.545	1.08078e+07	AcCa(12:0)+H	AcCa(12:0)+H	AcCa	C19 H38 O4 N1	344.28	A	344.279	-0.81	59.545	344.279	-0.12	59.31	0.100537	1.05925	0.698732	1.01035	0.105163	0.913468	0.0271384	0.953265	0.879525	0.988638	0.119698	1.13153	0.678113	0.976635	0.212384	0.918998	0.442949	0.946832	0.151619	0.872855	0.446269	1.12022	0.240904	1.0931	0.257882	1.21003
POSITIVE ION LIPIDS	2640	M342T51	342.264	51.1201	1.22559e+07	AcCa(12:1)+H	AcCa(12:1)+H	AcCa	C19 H36 O4 N1	342.264	A	342.264	-0.99	51.1201	342.264	-0.12	50.13	0.0893861	1.06661	0.316354	1.027	0.490904	1.00996	0.31642	0.9782	0.166983	1.06027	0.156814	1.09928	0.0214682	0.924828	0.50922	0.955816	0.808252	0.987266	0.0789168	0.89698	0.465607	1.11528	0.180183	1.17077	0.419998	1.18916
POSITIVE ION LIPIDS	3056	M370T68	370.295	67.9938	9.0752e+06	AcCa(14:1)+H	AcCa(14:1)+H	AcCa	C21 H40 O4 N1	370.295	A	370.295	-1.17	67.9938	370.295	0.05	67.8	0.144902	1.04706	0.762531	1.00974	0.941471	1.00199	0.416187	0.975104	0.0630886	1.09647	0.42665	1.04567	0.196199	0.951934	0.887253	0.990194	0.499947	1.04746	0.128984	0.908343	0.464058	1.14129	0.321668	1.11571	0.469455	1.07695
POSITIVE ION LIPIDS	3016	M368T56	368.279	56.0916	7.4524e+06	AcCa(14:2)+H	AcCa(14:2)+H	AcCa	C21 H38 O4 N1	368.28	B	368.279	-0.78	56.0916	368.279	-0.15	55.53	0.233088	1.03748	0.480571	1.01416	0.588387	0.987633	0.520235	0.980218	0.458287	1.04049	0.229631	1.06887	0.037658	0.925448	0.551485	0.963373	0.947259	1.00447	0.149695	0.917821	0.421802	1.14046	0.139053	1.12772	0.317827	1.18824
POSITIVE ION LIPIDS	3537	M400T135	400.341	135.425	9.17494e+06	AcCa(16:0)+H	AcCa(16:0)+H	AcCa	C23 H46 O4 N1	400.342	A	400.341	-1.92	135.425	400.342	-0.27	134.4	0.0460862	1.06045	0.459826	1.01729	0.352311	0.969322	0.318972	0.962844	0.164637	1.04824	0.134172	1.03328	0.0668632	0.96864	0.805853	0.986389	0.396503	1.04072	0.203985	0.943473	0.401116	1.14403	0.9642	1.00315	0.769223	1.01931
POSITIVE ION LIPIDS	4021	M428T213	428.373	213.214	3.68346e+06	AcCa(18:0)+H	AcCa(18:0)+H	AcCa	C25 H50 O4 N1	428.373	B	428.373	-1.46	213.214	428.373	-0.08	213.51	0.728993	1.02308	0.931996	0.99497	0.900758	0.998125	0.270746	0.96891	0.253472	1.04223	0.244968	1.05745	0.0156665	0.924796	0.436625	0.954115	0.472609	0.965147	0.0213584	0.884014	0.285915	1.20915	0.991836	1.00083	0.346688	1.0774
POSITIVE ION LIPIDS	3982	M426T149	426.357	149.451	1.29129e+07	AcCa(18:1)+H	AcCa(18:1)+H	AcCa	C25 H48 O4 N1	426.358	B	426.357	-1.53	149.451	426.358	-0.24	149.67	0.211645	1.07018	0.725326	1.00925	0.26897	0.984805	0.164321	0.961778	0.446417	1.03106	0.198138	1.05864	0.294045	0.948167	0.436167	0.943597	0.846514	0.988258	0.0686013	0.903044	0.541997	1.13635	0.345145	1.06576	0.267474	1.0606
POSITIVE ION LIPIDS	3931	M424T107	424.341	106.952	1.09648e+07	AcCa(18:2)+H	AcCa(18:2)+H	AcCa	C25 H46 O4 N1	424.342	B	424.341	-1.76	106.952	424.342	-0.2	106.8	0.0854811	1.05995	0.465445	1.01491	0.022921	0.965957	0.106728	0.969968	0.900187	1.00557	0.182397	1.06904	0.0261703	0.928661	0.506757	0.965	0.89621	1.00818	0.212077	0.914089	0.482236	1.13526	0.265329	1.10091	0.142186	1.08231
POSITIVE ION LIPIDS	1881	M288T39	288.217	39.4576	2.45116e+07	AcCa(8:0)+H	AcCa(8:0)+H	AcCa	C15 H30 O4 N1	288.217	A	288.217	-1.31	39.4576	288.217	-0.07	39.21	0.0576097	1.05274	0.688563	1.00476	0.768042	0.993429	0.166732	0.961089	0.464405	1.04153	0.243519	1.08429	0.0984683	0.929583	0.723032	0.979907	0.962089	1.00287	0.0955302	0.913717	0.366881	0.955515	0.964502	1.00283	0.476826	1.37522
POSITIVE ION LIPIDS	5542	M539T480	538.519	479.844	2.29396e+06	Cer(d18:1_16:0)+H	Cer(d34:1)+H	Cer	C34 H68 O3 N1	538.519	B	538.519	-1.28	479.844	538.519	-0.08	479.88	NA	NA	NA	NA	NA	NA	NA	1.3447	0.621629	0.933123	0.781694	1.04647	0.0137509	0.913769	0.68323	0.971629	0.737988	1.01995	0.57669	0.980858	0.429865	1.08393	0.210934	0.916897	0.776711	0.979154
POSITIVE ION LIPIDS	5919	M567T502	566.55	502.159	1.64105e+06	Cer(d18:1_18:0)+H	Cer(d36:1)+H	Cer	C36 H72 O3 N1	566.551	B	566.55	-1.17	502.159	566.551	0.02	502.23	NA	NA	NA	NA	NA	NA	NA	NA	0.127807	1.31795	0.566096	0.923985	0.00871641	0.897085	0.755501	1.01182	0.0667734	1.10682	0.929154	1.00237	0.36701	1.17364	0.198301	1.0613	0.453681	0.907069
POSITIVE ION LIPIDS	6303	M595T522	594.581	521.76	2.0047e+06	Cer(d18:1_20:0)+H	Cer(d38:1)+H	Cer	C38 H76 O3 N1	594.582	B	594.581	-0.92	521.76	594.582	-0.04	521.67	NA	NA	NA	NA	NA	1.1657	NA	1.31664	0.0675287	1.44159	0.501767	1.07493	0.0292876	0.932498	0.957881	1.0031	0.871855	0.991853	0.52616	0.966196	0.285759	1.18411	0.217379	1.09875	0.489443	0.950514
POSITIVE ION LIPIDS	6713	M623T539	622.613	538.954	1.4299e+07	Cer(d18:1_22:0)+H	Cer(d40:1)+H	Cer	C40 H80 O3 N1	622.613	B	622.613	-0.68	538.954	622.613	-0.03	538.77	0.331993	1.46564	0.500005	1.39672	0.0618799	1.77234	0.000204462	1.83079	0.022905	1.65371	0.349024	1.15593	0.924265	1.00713	0.757112	0.972394	0.860087	1.00835	0.135738	0.92543	0.403422	1.17545	0.19353	1.09137	0.460482	0.915305
POSITIVE ION LIPIDS	6689	M621T523	620.597	522.793	2.33778e+06	Cer(d18:2_22:0)+H	Cer(d40:2)+H	Cer	C40 H78 O3 N1	620.598	B	620.597	-0.54	522.793	620.598	-0.02	522.63	0.852533	1.07931	0.765957	0.882612	0.0602388	0.840773	0.0299712	1.17091	0.62051	0.982354	0.523898	1.01658	0.724879	0.992647	0.700422	1.01974	0.392208	1.0467	0.814933	0.985982	0.331799	1.17563	0.124484	1.1401	0.380231	0.931911
POSITIVE ION LIPIDS	7061	M649T539	648.628	539.295	1.9528e+07	Cer(d18:1_24:1)+H	Cer(d42:2)+H	Cer	C42 H82 O3 N1	648.629	B	648.628	-0.77	539.295	648.629	-0.05	538.83	0.553814	1.21772	0.778522	0.889314	0.791227	1.02291	0.000228328	1.35788	0.476918	0.951452	0.0998925	0.857125	0.0460588	0.954349	0.818084	1.01113	0.949386	0.997259	0.0812569	0.92729	0.437542	1.16447	0.153796	1.09001	0.383729	0.901474
POSITIVE ION LIPIDS	7038	M647T523	646.613	523.052	2.66965e+06	Cer(d18:2_24:1)+H	Cer(d42:3)+H	Cer	C42 H80 O3 N1	646.613	B	646.613	-0.74	523.052	646.613	-0.05	522.9	0.550586	1.23412	0.752385	0.874778	0.0267297	0.81476	0.177398	1.09259	0.367843	0.965	0.684374	0.989445	0.954336	1.00212	0.946253	0.995607	0.367339	1.03055	0.597784	0.97981	0.489897	1.09755	0.194057	1.07643	0.270633	0.889984
POSITIVE ION LIPIDS	3037	M369T428	369.351	428.103	9.05244e+07	ChE()+H-H2O	ChE()+H-H2O	ChE	C27 H45 O0	369.352	C	369.351	-1.42	428.103	369.352	-0.09	428.37	0.982493	1.00098	0.959946	0.997071	0.389649	0.954703	0.454086	1.02047	0.78156	0.993835	0.485104	0.982044	0.819825	1.01123	0.715766	1.02084	0.434504	0.976413	0.016816	0.94595	0.70954	1.0263	0.949358	1.00278	0.639967	0.962573
POSITIVE ION LIPIDS	7649	M693T599	692.633	599.227	3.6146e+06	ChE(20:3)+NH4	ChE(20:3)+NH4	ChE	C47 H82 O2 N1	692.634	B	692.633	-1.6	599.227	692.634	-0.18	599.37	0.814071	0.979828	0.532879	0.911969	0.441068	1.0635	0.0700427	1.27482	0.473988	0.853645	0.539778	0.773234	0.0453829	1.09223	0.30509	0.912746	0.108608	0.821014	0.513586	1.04793	0.763713	0.97608	0.428809	0.715621	0.719426	0.909946
POSITIVE ION LIPIDS	7383	M674T591	673.591	591.023	1.4888e+06	ChE(20:4)+H	ChE(20:4)+H	ChE	C47 H77 O2	673.592	B	673.591	-1.21	591.023	673.592	-0.1	591.24	NA	NA	NA	NA	NA	NA	NA	1.23073	0.227868	0.831727	0.161057	0.713159	0.0952388	1.14421	0.350822	0.924381	0.0437975	0.755369	0.470971	1.11732	0.274643	1.06718	0.873694	0.973472	0.525206	0.811688
POSITIVE ION LIPIDS	7942	M715T585	714.617	584.627	1.43591e+07	ChE(22:6)+NH4	ChE(22:6)+NH4	ChE	C49 H80 O2 N1	714.618	B	714.617	-1.33	584.627	714.618	-0.11	584.52	0.888618	1.02753	0.41532	0.780269	0.116996	0.87522	0.0258179	1.23032	0.46879	0.887425	0.445456	0.802192	0.111117	1.23648	0.412275	0.872951	0.285343	0.914802	0.254719	1.09456	0.308	1.0739	0.716611	1.08941	0.509346	1.18281
POSITIVE ION LIPIDS	10448	M881T573	880.717	572.67	9.48286e+06	Co(Q10)+NH4	Co(Q10)+NH4	Co	C59 H94 O4 N1	880.718	A	880.717	-1.34	572.67	880.718	-0.1	572.67	0.660293	0.827704	0.420191	0.710222	0.0101787	0.55902	0.081842	0.813267	0.395846	1.29402	0.259975	1.225	0.826182	1.04258	0.401929	0.84943	0.174094	1.08567	0.304086	1.03689	0.775124	1.02331	0.565899	1.13046	0.3479	1.14603
POSITIVE ION LIPIDS	6130	M583T477	582.509	476.58	4.72112e+06	DG(14:0_18:2)+NH4	DG(32:2)+NH4	DG	C35 H68 O5 N1	582.509	B	582.509	-0.97	476.58	582.509	-0.03	476.25	0.285417	1.27715	0.608572	1.10612	0.288254	0.915572	0.394896	0.982609	0.164269	1.05175	0.62573	1.00999	0.555252	0.964634	0.414594	0.95489	0.95155	1.00371	0.189471	0.916746	0.493485	1.10253	0.853308	1.01288	0.0392596	0.807101
POSITIVE ION LIPIDS	6607	M615T531	614.571	531.257	2.95702e+06	DG(18:0_16:0)+NH4	DG(34:0)+NH4	DG	C37 H76 O5 N1	614.572	B	614.571	-0.62	531.257	614.572	-0.01	531.48	0.959766	0.987089	0.407091	0.753071	0.126677	0.801349	0.00507871	1.13654	0.39713	1.10266	0.724186	0.965402	0.00424487	0.88334	0.508732	0.967118	0.998663	0.999897	0.214595	0.944658	0.372212	1.17101	0.289606	1.08087	0.293115	0.87742
POSITIVE ION LIPIDS	6512	M609T479	608.524	479.093	9.10908e+06	DG(16:0_18:3)+NH4	DG(34:3)+NH4	DG	C37 H70 O5 N1	608.525	B	608.524	-0.94	479.093	608.525	-0.06	478.5	0.14379	1.23941	0.605311	1.06729	0.459335	0.915418	0.528619	0.974553	0.960879	0.996004	0.98563	1.00143	0.746917	0.984051	0.652767	0.952112	0.676032	1.0299	0.9647	0.997406	0.169645	1.14326	0.590471	1.03409	0.0754401	0.873548
POSITIVE ION LIPIDS	6870	M635T483	634.54	482.824	2.23718e+07	DG(18:2_18:2)+NH4	DG(36:4)+NH4	DG	C39 H72 O5 N1	634.541	A	634.54	-1.48	482.824	634.54	-0.05	482.7	0.0867419	1.30103	0.36914	1.11386	0.360081	0.926054	0.232024	0.976777	0.119394	0.966345	0.489997	0.984863	0.213988	0.960505	0.296094	0.963673	0.462883	1.04429	0.505914	0.974926	0.370937	1.09934	0.589345	1.01687	0.150198	0.870354
POSITIVE ION LIPIDS	6830	M633T469	632.525	468.714	9.6384e+06	DG(18:3_18:2)+NH4	DG(36:5)+NH4	DG	C39 H70 O5 N1	632.525	B	632.525	-0.36	468.714	632.525	-0.12	464.64	0.172799	1.26615	0.413162	1.11344	0.456722	0.949895	0.039169	0.951812	0.816883	1.00857	0.212427	1.02521	0.29336	0.967204	0.652827	0.977892	0.645373	0.974514	0.0498003	0.905258	0.588159	1.07719	0.289654	1.05755	0.194855	0.87952
POSITIVE ION LIPIDS	7200	M661T495	660.555	494.675	2.06285e+07	DG(20:3_18:2)+NH4	DG(38:5)+NH4	DG	C41 H74 O5 N1	660.556	B	660.555	-1.29	494.675	660.556	-0.11	494.46	0.229441	1.27333	0.789653	1.04438	0.115206	0.825931	0.776141	0.985077	0.85042	0.998015	0.969707	0.998618	0.44696	0.97654	0.227871	0.949788	0.565318	0.963322	0.467517	0.960063	0.617527	1.09671	0.613545	1.02845	0.237917	0.899801
POSITIVE ION LIPIDS	7166	M659T477	658.54	476.833	1.67073e+07	DG(18:2_20:4)+NH4	DG(38:6)+NH4	DG	C41 H72 O5 N1	658.541	B	658.54	-1.21	476.833	658.54	-0.06	476.58	0.165967	1.29844	0.403048	1.12181	0.348319	0.922876	0.0355994	0.964739	0.499857	1.01795	0.552314	0.989893	0.444716	0.974034	0.505231	0.97291	0.405057	1.05676	0.446337	0.958692	0.510767	1.10643	0.2895	1.04777	0.181234	0.8723
POSITIVE ION LIPIDS	7138	M657T459	656.523	458.944	1.96234e+06	DG(20:5_18:2)+NH4	DG(38:7)+NH4	DG	C41 H70 O5 N1	656.525	B	656.523	-2.73	458.944	656.525	-0.11	458.82	0.0119383	1.38908	0.0269908	1.26055	0.732981	0.963842	0.142616	1.1063	0.286406	1.08781	0.812668	1.01683	0.901999	1.00658	0.213205	1.08897	0.233484	0.922162	0.0580967	0.876957	0.234984	1.19873	0.487944	0.942775	0.0934694	0.872595
POSITIVE ION LIPIDS	7593	M689T510	688.587	509.948	1.56844e+06	DG(18:1_22:4)+NH4	DG(40:5)+NH4	DG	C43 H78 O5 N1	688.587	B	688.587	-0.75	509.948	688.587	-0.1	509.37	0.227569	1.43699	0.99153	1.00305	0.178431	0.789973	0.348247	0.975855	0.257948	1.0287	0.76861	0.993392	0.171706	0.943389	0.343395	0.958799	0.208799	0.958308	0.0376036	0.861184	0.469617	1.16754	0.322604	1.06355	0.148348	0.822157
POSITIVE ION LIPIDS	7565	M687T494	686.571	494.291	2.99444e+06	DG(18:1_22:5)+NH4	DG(40:6)+NH4	DG	C43 H76 O5 N1	686.572	B	686.571	-1.03	494.291	686.572	-0.23	494.76	0.208415	1.47445	0.530389	1.12593	0.0885732	0.813864	0.0736889	0.936423	0.48521	0.973443	0.294668	0.968401	0.224669	0.960423	0.11558	0.906143	0.666485	0.980679	0.310431	0.939007	0.620027	1.09359	0.401313	1.05037	0.237557	0.799456
POSITIVE ION LIPIDS	7533	M685T477	684.555	476.924	1.35054e+06	DG(22:5_18:2)+NH4	DG(40:7)+NH4	DG	C43 H74 O5 N1	684.556	B	684.555	-1.03	476.924	684.556	-0.13	476.61	NA	1.63252	NA	1.40414	0.376939	0.924246	0.211788	0.912486	0.318732	0.908939	0.25045	0.882904	NA	1.11364	0.328455	0.819555	NA	1.1229	NA	1.30283	0.397817	1.20947	0.473129	1.08255	0.0658106	0.788188
POSITIVE ION LIPIDS	8890	M785T525	784.665	524.524	6.63516e+06	Hex1Cer(d18:1_22:0)+H	Hex1Cer(d40:1)+H	Hex1Cer	C46 H90 O8 N1	784.666	A	784.665	-0.8	524.524	784.666	-0.1	524.16	NA	NA	NA	NA	NA	NA	NA	NA	0.115662	1.27474	0.494303	0.873464	0.0709933	0.915235	0.314845	0.96486	0.541848	0.960447	0.100581	0.889386	0.234291	1.18399	0.394045	1.05268	0.385007	0.925723
POSITIVE ION LIPIDS	9094	M799T533	798.681	532.803	3.97403e+06	Hex1Cer(d18:1_23:0)+H	Hex1Cer(d41:1)+H	Hex1Cer	C47 H92 O8 N1	798.682	A	798.681	-0.84	532.803	798.682	-0.04	532.62	NA	NA	NA	NA	NA	NA	NA	NA	0.04616	1.51726	0.841024	0.965436	0.868461	1.00934	0.439844	0.953735	0.580295	0.971217	0.0855853	0.891249	0.344371	1.19126	0.0592915	1.1661	0.360695	0.888675
POSITIVE ION LIPIDS	10170	M863T452	862.623	452.359	9.34297e+06	Hex2Cer(d18:1_16:0)+H	Hex2Cer(d34:1)+H	Hex2Cer	C46 H88 O13 N1	862.625	A	862.623	-1.97	452.359	862.625	-0.22	452.4	0.50337	0.91002	NA	1.30225	NA	1.04666	NA	1.45246	0.00539094	0.756793	0.0153834	0.791394	0.435966	0.97643	0.926963	1.00701	0.900546	1.0059	0.116721	0.930166	0.413475	1.17093	0.515467	1.03382	0.872852	0.982938
POSITIVE ION LIPIDS	11543	M973T518	972.733	517.589	2.89281e+06	Hex2Cer(d18:1_24:1)+H	Hex2Cer(d42:2)+H	Hex2Cer	C54 H102 O13 N1	972.735	A	972.733	-1.31	517.589	972.734	-0.15	517.38	NA	NA	NA	NA	NA	NA	NA	NA	0.0249026	0.767707	0.0731764	0.758786	0.0659831	0.906758	0.466861	0.943001	0.994908	1.00048	0.065991	0.878034	0.455212	1.22427	0.198087	1.11965	0.499921	0.899562
POSITIVE ION LIPIDS	4623	M468T86	468.308	86.175	3.29793e+07	LPC(14:0)+H	LPC(14:0)+H	LPC	C22 H47 O7 N1 P1	468.308	B	468.308	-0.47	86.175	468.308	0	85.6749	0.113014	1.07256	0.695113	1.01297	0.275778	0.949134	0.097241	0.926489	0.428961	1.07331	0.0578922	1.14619	0.0609237	0.890624	0.588065	0.957619	0.731045	1.01718	0.725882	1.01487	0.467664	1.12275	0.270911	1.11396	0.341236	1.1453
POSITIVE ION LIPIDS	4813	M482T107	482.324	106.684	2.21827e+07	LPC(15:0)+H	LPC(15:0)+H	LPC	C23 H49 O7 N1 P1	482.324	B	482.324	-0.98	106.684	482.324	0	106.65	0.538313	1.0536	0.956701	1.00377	0.806135	1.01793	0.168079	0.915627	0.458875	1.07967	0.509829	1.07672	0.247155	0.892454	0.175463	0.907353	0.70257	0.965081	0.528592	0.93028	0.862305	1.03823	0.289724	1.10912	0.903612	0.986008
POSITIVE ION LIPIDS	4989	M496T135	496.339	134.849	3049629256	LPC(16:0)+H	LPC(16:0)+H	LPC	C24 H51 O7 N1 P1	496.34	B	496.339	-0.8	134.849	496.34	-0.06	134.55	0.547378	1.06688	0.695747	1.03386	0.311915	0.924591	0.193784	0.894483	0.241639	0.914129	0.781631	0.981417	0.149107	0.953193	0.677212	0.976764	0.874996	1.01836	0.649643	1.03974	0.531364	1.10803	0.33459	1.08298	0.398108	1.05435
POSITIVE ION LIPIDS	4818	M482T165	482.36	165.285	2.82402e+07	LPC(16:0e)+H	LPC(16:0e)+H	LPC	C24 H53 O6 N1 P1	482.361	B	482.36	-0.31	165.285	482.361	0.01	164.91	0.425727	1.04246	0.560451	1.02613	0.027924	0.976856	0.0932451	0.967577	0.512754	1.0244	0.211694	1.06081	0.0148183	0.908565	0.541318	0.95873	0.940019	0.996137	0.115335	0.915101	0.503738	1.13391	0.334041	1.10519	0.300021	1.06147
POSITIVE ION LIPIDS	5168	M510T173	510.355	172.611	5.30724e+07	LPC(17:0)+H	LPC(17:0)+H	LPC	C25 H53 O7 N1 P1	510.355	B	510.355	-0.05	172.611	510.355	0	172.56	0.412573	1.1488	0.18839	1.20488	0.172408	0.987925	0.0775237	0.964173	0.444404	1.03142	0.279408	1.05908	0.0225838	0.929822	0.646455	0.968027	0.483547	1.13655	0.80547	1.04596	0.486491	1.13697	0.278397	1.10485	0.241745	1.05937
POSITIVE ION LIPIDS	5138	M508T118	508.34	118.103	5.05573e+06	LPC(17:1)+H	LPC(17:1)+H	LPC	C25 H51 O7 N1 P1	508.34	B	508.34	-0.23	118.103	508.34	-0.01	118.02	0.0468633	1.06828	0.537836	1.0148	0.324544	1.01328	0.121918	0.971035	0.387092	1.03779	0.130688	1.07653	0.113195	0.939656	0.62079	0.96949	0.956592	1.00302	0.158868	0.922065	0.530304	1.12429	0.286681	1.09495	0.27673	1.06927
POSITIVE ION LIPIDS	5351	M524T214	524.371	214.461	1084560870	LPC(18:0)+H	LPC(18:0)+H	LPC	C26 H55 O7 N1 P1	524.371	B	524.371	-0.41	214.461	524.371	0	214.23	0.541666	1.04437	0.767856	1.0189	0.0839446	0.976423	0.19785	0.963626	0.320117	1.05414	0.198773	1.05778	0.018518	0.932484	0.549231	0.960768	0.939567	0.996081	0.0617954	0.904427	0.409831	1.16202	0.31922	1.0762	0.212361	1.06959
POSITIVE ION LIPIDS	5174	M510T251	510.392	251.156	7.68058e+06	LPC(18:0e)+H	LPC(18:0e)+H	LPC	C26 H57 O6 N1 P1	510.392	B	510.392	0.09	251.156	510.392	-0.01	250.41	0.859682	0.982663	0.922581	0.990928	0.03723	0.97639	0.0340967	0.980092	0.613852	1.01986	0.226335	1.0658	0.135062	0.942684	0.611294	0.960955	0.491065	0.962231	0.0889163	0.890486	0.423551	1.16037	0.379612	1.06842	0.164884	1.0848
POSITIVE ION LIPIDS	5318	M522T150	522.355	149.608	4.98198e+08	LPC(18:1)+H	LPC(18:1)+H	LPC	C26 H53 O7 N1 P1	522.355	B	522.355	-0.47	149.608	522.355	0	149.7	0.425912	1.02733	0.697152	1.01429	0.00545636	0.97743	0.136485	0.9702	0.45325	1.03366	0.140866	1.06048	0.0532517	0.938103	0.469561	0.957844	0.85556	1.00975	0.0721277	0.916599	0.505587	1.13659	0.268297	1.10216	0.266144	1.05806
POSITIVE ION LIPIDS	5140	M508T244	508.376	244.228	4.64006e+06	LPC(18:1e)+H	LPC(18:1e)+H	LPC	C26 H55 O6 N1 P1	508.376	B	508.376	0.26	244.228	508.376	-0.13	244.05	0.445759	1.05606	0.669469	1.03076	0.466336	0.991373	0.0997045	0.973495	0.34015	1.04267	0.167357	1.06492	0.0692253	0.940471	0.564467	0.961525	0.962093	0.997969	0.101805	0.914367	0.459787	1.15583	0.373999	1.08481	0.424123	1.05684
POSITIVE ION LIPIDS	5141	M508T181	508.376	181.318	1.58105e+07	LPC(18:1e)+H	LPC(18:1e)+H	LPC	C26 H55 O6 N1 P1	508.376	B	508.376	0.03	181.318	508.376	-0.09	180.63	0.139229	1.05785	0.618597	1.01135	0.185197	0.980251	0.0450203	0.952549	0.587873	1.02417	0.286229	1.05957	0.0871964	0.934336	0.542857	0.954738	0.868526	1.0078	0.11242	0.923095	0.525274	1.1375	0.330633	1.08456	0.390994	1.04336
POSITIVE ION LIPIDS	5260	M518T83	518.324	82.6819	1.47982e+07	LPC(18:3)+H	LPC(18:3)+H	LPC	C26 H49 O7 N1 P1	518.324	B	518.324	-0.15	82.6819	518.324	-0.07	85.68	0.160711	1.04726	0.502807	1.00586	0.264767	0.981844	0.158847	0.966168	0.451982	1.03734	0.186427	1.05987	0.0269477	0.940412	0.480204	0.96049	0.806274	1.01334	0.106431	0.91756	0.450938	1.1447	0.173678	1.12328	0.304358	1.10264
POSITIVE ION LIPIDS	5536	M538T256	538.387	256.455	3.15428e+06	LPC(19:0)+H	LPC(19:0)+H	LPC	C27 H57 O7 N1 P1	538.387	B	538.387	0.04	256.455	538.387	-0.05	256.35	0.560084	1.18002	0.255466	1.31196	0.882475	0.971226	0.883341	0.971431	0.294127	1.17021	0.219843	1.20178	0.836284	0.955069	0.576178	0.853661	0.983889	1.00468	0.345672	0.784369	0.139752	1.45832	0.332846	1.08039	0.104167	1.19037
POSITIVE ION LIPIDS	5748	M552T294	552.402	293.956	4.00857e+06	LPC(20:0)+H	LPC(20:0)+H	LPC	C28 H59 O7 N1 P1	552.402	B	552.402	0.07	293.956	552.402	0.06	294	0.780699	1.03298	0.896157	1.0147	0.0281914	0.962796	0.080294	0.970223	0.27914	1.04421	0.276192	1.06711	0.106649	0.943197	0.81438	0.985654	0.916538	1.00523	0.0565757	0.897335	0.493602	1.1426	0.358805	1.06722	0.622221	1.03847
POSITIVE ION LIPIDS	5715	M550T229	550.387	228.812	7.66741e+06	LPC(20:1)+H	LPC(20:1)+H	LPC	C28 H57 O7 N1 P1	550.387	B	550.387	-0.18	228.812	550.387	-0.06	228.66	0.200906	1.07447	0.413109	1.03509	0.14429	0.98708	0.0320216	0.966674	0.572969	1.02508	0.278295	1.06078	0.0848638	0.944678	0.585499	0.964909	0.968901	0.998157	0.0672369	0.908125	0.421067	1.17009	0.266769	1.09175	0.51948	1.03829
POSITIVE ION LIPIDS	5680	M548T168	548.371	167.538	8.43938e+06	LPC(20:2)+H	LPC(20:2)+H	LPC	C28 H55 O7 N1 P1	548.371	B	548.371	-0.24	167.538	548.371	-0.06	167.28	0.168432	1.06485	0.383973	1.03042	0.0855057	0.980714	0.11742	0.968296	0.494149	1.02885	0.319986	1.0519	0.028007	0.922422	0.522428	0.95845	0.798741	0.987018	0.141398	0.911058	0.473583	1.15356	0.332853	1.08928	0.263421	1.04629
POSITIVE ION LIPIDS	5645	M546T125	546.355	124.693	5.98148e+07	LPC(20:3)+H	LPC(20:3)+H	LPC	C28 H53 O7 N1 P1	546.355	B	546.355	-0.66	124.693	546.355	-0.09	124.62	0.12675	1.06209	0.109465	1.03417	0.295526	1.00925	0.0321266	0.964379	0.498693	1.02311	0.188627	1.07302	0.0994892	0.93909	0.662177	0.970025	0.988703	0.999255	0.152375	0.919267	0.534432	1.12972	0.372949	1.07355	0.233665	1.0628
POSITIVE ION LIPIDS	5646	M546T113	546.355	113.454	6.34891e+06	LPC(20:3)+H	LPC(20:3)+H	LPC	C28 H53 O7 N1 P1	546.355	B	546.355	0	113.454	546.355	-0.12	114.6	0.0745665	1.07789	0.468128	1.01761	0.499089	0.991473	0.132784	0.976355	0.83001	0.993973	0.137501	1.06515	0.047937	0.937197	0.583894	0.968926	0.901372	0.993513	0.116275	0.91185	0.553951	1.1623	0.365385	1.07729	0.787507	1.01865
POSITIVE ION LIPIDS	5624	M544T102	544.339	102.489	2.48524e+08	LPC(20:4)+H	LPC(20:4)+H	LPC	C28 H51 O7 N1 P1	544.34	B	544.339	-0.56	102.489	544.34	-0.01	102.145	0.355855	1.08256	0.237926	1.06681	3.48011e-05	0.876308	0.321375	0.984998	0.636045	1.03422	0.0831157	1.16603	0.645204	0.961018	0.620638	0.971222	0.381835	1.04795	0.0356667	0.885181	0.496637	1.12992	0.324259	1.08116	0.208744	1.08008
POSITIVE ION LIPIDS	5598	M542T79	542.324	79.3799	1.53222e+07	LPC(20:5)+H	LPC(20:5)+H	LPC	C28 H49 O7 N1 P1	542.324	B	542.324	-0.27	79.3799	542.324	-0.02	74.25	0.129297	1.05286	0.30375	1.01992	0.490317	0.992555	0.158008	0.975337	0.579265	1.02449	0.232529	1.0754	0.38508	0.919322	0.446733	0.918781	0.996815	0.99976	0.834741	0.981711	0.395023	1.16528	0.0866879	1.15402	0.290494	1.08296
POSITIVE ION LIPIDS	5997	M572T148	572.371	148.111	5.25968e+06	LPC(22:4)+H	LPC(22:4)+H	LPC	C30 H55 O7 N1 P1	572.371	B	572.371	-0.92	148.111	572.371	-0.12	147.99	0.117293	1.16865	0.267165	1.06096	0.0259433	0.970858	0.146858	0.962957	0.536292	1.02556	0.140895	1.04632	0.0652869	0.937128	0.434781	0.962184	0.564666	0.953311	0.0896358	0.862107	0.518467	1.13534	0.174251	1.11612	0.300995	1.06534
POSITIVE ION LIPIDS	6507	M608T403	608.465	403.372	2.34902e+06	LPC(24:0)+H	LPC(24:0)+H	LPC	C32 H67 O7 N1 P1	608.465	B	608.465	-0.28	403.372	608.465	0.01	403.11	0.870229	1.02851	0.987148	1.00295	8.04286e-05	0.867606	0.0184728	0.961019	0.707208	1.01428	0.237561	1.05106	0.0601704	0.955817	0.869664	0.990257	0.912619	1.00682	0.0651464	0.906859	0.455708	1.15418	0.329001	1.06807	0.992611	0.999043
POSITIVE ION LIPIDS	5995	M572T109	572.334	108.772	1.7588e+06	PC(21:4)+H	PC(21:4)+H	PC	C29 H51 O8 N1 P1	572.335	C	572.334	-1.11	108.772	572.334	-0.33	108.09	NA	NA	NA	NA	NA	NA	NA	NA	NA	NA	NA	NA	NA	NA	NA	NA	NA	NA	NA	NA	0.148766	1.55008	0.0410307	0.675465	0.848751	1.05872
POSITIVE ION LIPIDS	7445	M679T426	678.506	426.175	6.43674e+06	PC(28:0)+H	PC(28:0)+H	PC	C36 H73 O8 N1 P1	678.507	C	678.506	-1.47	426.175	678.507	-0.06	426.12	0.530118	1.14201	0.892886	1.02976	0.964451	1.00129	0.14435	1.04843	0.078467	1.08473	0.17256	1.05543	0.402068	0.96711	0.767101	0.97994	0.864846	1.01051	0.217955	0.929987	0.516882	1.11148	0.270137	1.06846	0.931834	1.00798
POSITIVE ION LIPIDS	7835	M707T455_1	706.536	454.797	3.75901e+07	PC(30:0)+H	PC(30:0)+H	PC	C38 H77 O8 N1 P1	706.538	C	706.536	-2.34	454.797	706.538	-0.16	454.65	0.885316	1.03402	0.784949	0.936331	0.000155409	0.850722	0.64065	1.00918	0.79316	1.00501	0.550996	1.00942	0.063516	0.950491	0.745009	0.986797	0.534203	0.982225	0.268387	0.960324	0.471433	1.0684	0.813325	0.994901	0.936376	1.00482
POSITIVE ION LIPIDS	7802	M705T429	704.521	429.169	1.16685e+07	PC(30:1)+H	PC(30:1)+H	PC	C38 H75 O8 N1 P1	704.522	C	704.521	-1.59	429.169	704.522	-0.08	428.97	0.438701	1.14767	0.663184	1.07789	0.00158376	0.902062	0.0315749	0.953636	0.565855	0.973618	0.30583	1.04086	0.0163963	0.909233	0.53645	0.960903	0.546413	0.962146	0.0845767	0.913789	0.556304	1.11952	0.481185	1.04777	0.854235	0.982112
POSITIVE ION LIPIDS	7620	M691T469	690.542	468.85	1.83574e+06	PC(30:1e)+H	PC(30:1e)+H	PC	C38 H77 O7 N1 P1	690.543	C	690.542	-1.05	468.85	690.543	-0.01	468.36	NA	NA	NA	1.35764	0.0258804	0.741182	0.748502	0.976642	0.0505205	0.926404	0.941175	0.995078	0.375138	0.957013	0.401016	0.938267	0.221997	0.879173	0.147699	0.91472	0.266768	1.21109	0.83889	0.982896	0.372648	0.915562
POSITIVE ION LIPIDS	7957	M717T465	716.522	465.304	1.82252e+07	PC(31:2)+H	PC(31:2)+H	PC	C39 H75 O8 N1 P1	716.522	C	716.522	-1.27	465.304	716.522	-0.08	465.36	0.387545	1.15972	0.792792	1.04081	0.0173526	0.864251	0.330788	0.966176	0.835375	0.993986	0.940312	1.00307	0.218536	0.954334	0.930352	1.00437	0.953377	0.995791	0.226284	0.925023	0.619992	1.09042	0.874399	1.01085	0.619666	0.960705
POSITIVE ION LIPIDS	8210	M735T480	734.569	479.785	1.9195e+08	PC(32:0)+H	PC(32:0)+H	PC	C40 H81 O8 N1 P1	734.569	C	734.569	-1.26	479.785	734.569	-0.11	479.49	0.859854	0.963451	0.643848	0.898616	0.000601337	0.829451	0.020549	1.0889	0.00701748	0.93245	0.00339681	0.968885	0.00396672	0.942662	0.36586	0.97128	0.361406	1.02425	0.0526953	0.963749	0.474738	1.07144	0.704905	0.986363	0.558263	0.967023
POSITIVE ION LIPIDS	8029	M721T497	720.589	496.517	6.01757e+07	PC(32:0e)+H	PC(32:0e)+H	PC	C40 H83 O7 N1 P1	720.59	C	720.589	-1.31	496.517	720.59	-0.15	496.02	0.90401	0.971886	0.780753	0.93069	0.00622848	0.858192	0.0040593	1.15258	0.0137776	0.887549	0.0327036	0.919482	0.0253595	0.925101	0.367499	0.950644	0.853826	1.00655	0.105809	0.935866	0.504181	1.11865	0.428419	1.04269	0.658046	0.961226
POSITIVE ION LIPIDS	8181	M733T458	732.552	457.698	1.63802e+08	PC(32:1)+H	PC(32:1)+H	PC	C40 H79 O8 N1 P1	732.554	C	732.552	-1.77	457.698	732.554	-0.18	457.41	0.307454	1.12439	0.640723	1.05262	0.0721847	0.956169	0.465075	0.98576	0.149911	1.02873	0.341473	1.03061	0.0483173	0.960571	0.874593	0.994339	0.7833	0.991847	0.136795	0.952318	0.510444	1.07095	0.614434	0.987835	0.931171	0.994062
POSITIVE ION LIPIDS	7998	M719T476	718.573	475.569	1.17208e+07	PC(32:1e)+H	PC(32:1e)+H	PC	C40 H81 O7 N1 P1	718.575	C	718.573	-2.29	475.569	718.574	-0.2	475.95	0.828335	1.04601	NA	1.0935	0.000950096	0.894688	0.296674	0.981481	0.821176	0.996524	0.823004	1.00775	0.0672485	0.931608	0.515372	0.964592	0.966732	1.00176	0.359589	0.968782	0.624595	1.08157	0.600118	1.02108	0.361467	0.933624
POSITIVE ION LIPIDS	7999	M719T493	718.574	493.112	5.15021e+07	PC(32:1e)+H	PC(32:1e)+H	PC	C40 H81 O7 N1 P1	718.575	C	718.574	-1.32	493.112	718.574	-0.03	492.75	0.501065	0.847325	0.737237	1.0808	4.08999e-05	0.829874	0.015501	1.08607	0.0317901	0.915908	0.0609932	0.940593	0.0446372	0.935477	0.409145	0.969663	0.782193	0.987965	0.0483409	0.937996	0.530094	1.10406	0.309174	1.04734	0.741858	0.9703
POSITIVE ION LIPIDS	8157	M731T435	730.537	435.105	1.04937e+08	PC(32:2)+H	PC(32:2)+H	PC	C40 H77 O8 N1 P1	730.538	C	730.537	-1.26	435.105	730.538	-0.14	434.82	0.261803	1.17175	0.453205	1.09568	0.0110385	0.953373	0.00373811	0.953736	0.524277	1.02463	0.269122	1.05458	0.0904734	0.950432	0.763852	0.981959	0.983284	0.998905	0.0575946	0.896736	0.489404	1.13844	0.564688	1.03673	0.757306	0.970817
POSITIVE ION LIPIDS	8136	M729T412	728.522	411.568	2.33737e+06	PC(32:3)+H	PC(32:3)+H	PC	C40 H75 O8 N1 P1	728.522	C	728.522	-0.72	411.568	728.523	0.05	411.57	0.215066	1.14891	0.372226	1.08619	0.0908356	0.97267	0.158798	0.970243	0.654796	1.02286	0.015997	1.11017	NA	0.963756	NA	1.06309	0.724466	0.976263	NA	0.855242	0.482108	1.17912	0.894422	0.989313	0.780673	0.974837
POSITIVE ION LIPIDS	8391	M749T489	748.585	488.578	1.5831e+07	PC(33:0)+H	PC(33:0)+H	PC	C41 H83 O8 N1 P1	748.585	C	748.585	-0.53	488.578	748.585	-0.17	487.44	0.745447	1.07611	0.855174	0.956499	0.000283093	0.848644	0.0535399	1.07103	0.0819924	0.945069	0.428576	0.981072	0.0380416	0.934016	0.732643	0.988508	0.734918	1.01342	0.0183572	0.942776	0.496482	1.09559	0.525163	1.03319	0.36058	0.947789
POSITIVE ION LIPIDS	8364	M747T470	746.568	470.436	5.37513e+07	PC(33:1)+H	PC(33:1)+H	PC	C41 H81 O8 N1 P1	746.569	C	746.568	-1.55	470.436	746.569	-0.12	470.34	0.38884	1.15439	0.715735	1.06135	0.0175385	0.934045	0.182927	0.96606	0.948602	0.997885	0.784439	1.01107	0.0853695	0.947198	0.163906	0.949168	0.648022	0.979294	0.164593	0.938377	0.498639	1.09749	0.374087	1.03653	0.496009	0.94376
POSITIVE ION LIPIDS	8336	M745T449	744.553	449.319	7.81355e+07	PC(33:2)+H	PC(33:2)+H	PC	C41 H79 O8 N1 P1	744.554	C	744.553	-1.42	449.319	744.554	-0.04	449.04	0.202938	1.18434	0.479442	1.09309	0.11929	0.962813	0.323695	0.978815	0.4616	0.97629	0.615182	0.988053	0.287702	0.977642	0.798913	0.987809	0.367128	0.962913	0.109047	0.917639	0.429672	1.15194	0.380476	1.04392	0.397517	0.933201
POSITIVE ION LIPIDS	8531	M761T482	760.584	481.782	2699691018	PC(34:1)+H	PC(34:1)+H	PC	C42 H83 O8 N1 P1	760.585	C	760.584	-1.48	481.782	760.585	-0.15	481.68	0.0159458	1.29621	0.0288109	0.80069	0.779984	0.952108	0.372233	0.88877	0.55359	0.990088	0.387278	1.12642	0.0677944	0.753667	0.0970451	0.784269	0.650368	0.938837	0.0970817	0.781928	0.391098	1.08135	0.348951	0.888725	0.81169	0.957397
POSITIVE ION LIPIDS	8366	M747T498	746.605	498.055	1.3989e+08	PC(34:1e)+H	PC(34:1e)+H	PC	C42 H85 O7 N1 P1	746.606	C	746.605	-1.28	498.055	746.606	-0.15	497.58	0.361249	1.19507	0.830263	1.0432	9.50189e-05	0.843396	0.906282	0.997864	0.65379	0.991775	0.639882	1.01294	0.0614798	0.933869	0.530927	0.967843	0.970389	1.0013	0.0571297	0.919569	0.513581	1.12063	0.348706	1.05216	0.559394	0.949123
POSITIVE ION LIPIDS	8499	M759T462	758.568	461.788	5933761824	PC(34:2)+H	PC(34:2)+H	PC	C42 H81 O8 N1 P1	758.569	C	758.568	-1.33	461.788	758.569	-0.11	461.34	0.163659	1.12912	0.454494	1.05838	0.285507	0.970745	0.929101	0.997858	0.615684	1.00531	0.401981	1.0171	0.0650751	0.969137	0.944228	0.997875	0.932317	0.997637	0.0964301	0.958403	0.510755	1.06623	0.861533	1.00427	0.612274	0.971119
POSITIVE ION LIPIDS	8342	M745T478	744.589	478.295	1.57109e+08	PC(34:2e)+H	PC(34:2e)+H	PC	C42 H83 O7 N1 P1	744.59	C	744.589	-2.15	478.295	744.59	-0.13	478.29	0.689458	1.11883	0.752405	0.925085	0.20761	1.21345	0.486107	1.1285	0.359959	0.853953	0.433856	0.877303	0.187292	0.879358	0.268537	0.892353	0.964349	0.994761	0.587565	0.940112	0.8319	1.03365	0.357446	0.909679	0.0776414	0.865777
POSITIVE ION LIPIDS	8474	M757T442	756.553	441.617	4.77338e+08	PC(34:3)+H	PC(34:3)+H	PC	C42 H79 O8 N1 P1	756.554	C	756.553	-1.18	441.617	756.554	-0.06	442.05	0.204397	1.17479	0.377329	1.10091	0.0989708	0.966154	0.0594124	0.96033	0.706057	1.01079	0.213286	1.05423	0.0563612	0.959249	0.589563	0.97006	0.935788	1.00348	0.119648	0.926986	0.504765	1.12763	0.543741	1.03779	0.580126	0.953166
POSITIVE ION LIPIDS	8451	M755T429	754.537	428.841	1.05094e+08	PC(34:4)+H	PC(34:4)+H	PC	C42 H77 O8 N1 P1	754.538	C	754.537	-1.56	428.841	754.538	-0.13	428.88	0.261974	1.20692	0.486913	1.11002	0.00683769	0.907034	0.0134371	0.9346	0.649203	0.983589	0.408288	1.03464	0.0618634	0.937061	0.549854	0.966961	0.979507	0.998762	0.0917618	0.935927	0.577305	1.09802	0.405374	1.04919	0.793799	0.973435
POSITIVE ION LIPIDS	8730	M775T493	774.6	493.029	9.58905e+07	PC(35:1)+H	PC(35:1)+H	PC	C43 H85 O8 N1 P1	774.601	C	774.6	-1.47	493.029	774.601	-0.05	493.14	0.322914	1.23089	0.816351	1.04997	0.00490565	0.867254	0.574398	0.983133	0.949032	0.997974	0.498809	1.02519	0.126463	0.951811	0.481218	0.963518	0.726096	1.01371	0.0240757	0.927652	0.447862	1.13801	0.264004	1.04433	0.604454	0.955074
POSITIVE ION LIPIDS	8698	M773T474	772.584	474.191	2.32112e+08	PC(35:2)+H	PC(35:2)+H	PC	C43 H83 O8 N1 P1	772.585	C	772.584	-1.66	474.191	772.585	-0.08	470.64	0.413481	1.14058	0.747988	1.04947	0.00224241	0.935738	0.0690729	0.973218	0.150449	1.02479	0.382079	1.02735	0.294163	0.964366	0.436877	0.965347	0.904177	1.00581	0.0581447	0.941304	0.455539	1.10553	0.503544	1.02544	0.503512	0.94242
POSITIVE ION LIPIDS	8667	M771T452	770.568	452.417	2.59564e+07	PC(35:3)+H	PC(35:3)+H	PC	C43 H81 O8 N1 P1	770.569	C	770.568	-1.73	452.417	770.569	-0.13	451.47	0.18343	1.19013	0.337902	1.11235	0.000256531	0.931852	NA	0.914104	NA	0.990924	0.0851036	1.04679	0.0114066	0.933623	0.703723	0.975286	0.711537	1.01609	NA	0.935729	0.418195	1.12261	0.766953	1.01829	0.357781	1.0581
POSITIVE ION LIPIDS	8634	M769T444	768.553	443.509	3.78664e+07	PC(35:4)+H	PC(35:4)+H	PC	C43 H79 O8 N1 P1	768.554	C	768.553	-1.21	443.509	768.554	-0.26	443.34	0.224473	1.16739	0.375783	1.09243	0.26875	0.982068	0.0371915	0.9676	0.598984	1.01378	0.145974	1.05381	0.186614	0.939452	0.489322	0.951111	0.536189	0.966081	0.25855	0.935917	0.531093	1.10132	0.429063	1.06267	0.411743	0.932203
POSITIVE ION LIPIDS	8765	M777T537	776.652	536.756	1.27124e+06	PC(36:0e)+H	PC(36:0e)+H	PC	C44 H91 O7 N1 P1	776.653	C	776.652	-1.45	536.756	776.653	-0.03	533.79	NA	NA	NA	NA	NA	NA	NA	NA	0.0251804	0.836153	0.0476354	0.790138	0.0123437	0.880331	0.649245	0.977634	0.227777	0.88775	0.14577	0.871364	0.447939	1.15844	0.398664	1.08509	0.595073	0.934882
POSITIVE ION LIPIDS	8933	M789T504	788.615	503.507	8.85669e+08	PC(36:1)+H	PC(36:1)+H	PC	C44 H87 O8 N1 P1	788.616	C	788.615	-1.32	503.507	788.616	-0.1	503.04	0.450423	1.17765	0.993381	0.998197	0.0806245	0.559736	0.943834	0.980916	0.399339	1.24976	0.56993	1.01455	0.027697	0.955592	0.616385	0.980916	0.781474	0.990232	0.106101	0.938014	0.466243	1.1076	0.37778	1.04234	0.386439	0.930765
POSITIVE ION LIPIDS	8913	M787T486	786.6	485.764	4085935064	PC(36:2)+H	PC(36:2)+H	PC	C44 H85 O8 N1 P1	786.601	C	786.6	-1.31	485.764	786.601	-0.13	485.37	0.29928	1.16498	0.722595	1.05419	0.0220588	0.941662	0.175348	0.969317	0.317421	1.01164	0.265822	1.02294	0.231079	0.974394	0.958526	1.00212	0.161534	1.04857	0.380458	0.988721	0.585426	1.05853	0.955457	0.997398	0.546863	0.967719
POSITIVE ION LIPIDS	8701	M773T501	772.62	500.796	7.51705e+07	PC(36:2e)+H	PC(36:2e)+H	PC	C44 H87 O7 N1 P1	772.621	C	772.62	-1.78	500.796	772.621	-0.15	500.91	0.253365	1.24548	0.749872	1.05984	4.99939e-05	0.868318	0.164373	0.968722	0.572311	0.987586	0.726463	1.01555	0.0613	0.943239	0.545866	0.972416	0.983369	0.99918	0.0242623	0.913509	0.503675	1.11543	0.413135	1.04037	0.533694	0.944012
POSITIVE ION LIPIDS	8884	M785T468	784.584	467.508	3023604961	PC(36:3)+H	PC(36:3)+H	PC	C44 H83 O8 N1 P1	784.585	C	784.584	-1.51	467.508	784.585	-0.14	467.76	0.183989	1.17366	0.324543	1.10857	0.610535	0.987497	0.696331	1.00437	0.582801	1.01998	0.0790352	1.04363	0.0947897	0.935228	0.759311	0.982343	0.906989	0.994821	0.0139469	0.935074	0.657036	1.06254	0.758937	1.01091	0.761533	0.979061
POSITIVE ION LIPIDS	8670	M771T498	770.605	497.925	8.07219e+07	PC(36:3e)+H	PC(36:3e)+H	PC	C44 H85 O7 N1 P1	770.606	C	770.605	-1.41	497.925	770.606	0	497.7	NA	NA	NA	NA	0.000677453	0.870481	0.601608	0.982725	0.950477	0.998442	0.760105	1.01027	0.0526436	0.941788	0.651506	0.975311	0.944334	1.00234	0.0682927	0.92035	0.54852	1.11151	0.297037	1.05818	0.467663	0.937908
POSITIVE ION LIPIDS	8852	M783T457	782.568	456.547	3862946008	PC(36:4)+H	PC(36:4)+H	PC	C44 H81 O8 N1 P1	782.569	C	782.568	-1.53	456.547	782.567	-2.93	456.39	0.258119	1.09397	0.787416	1.01875	0.808404	0.972733	0.232219	0.89685	0.76994	1.0313	0.490693	0.948571	0.709734	1.03852	0.611567	1.06606	0.71605	0.988043	0.662557	1.03833	0.0320641	1.32843	0.439349	1.08233	0.145551	0.872369
POSITIVE ION LIPIDS	8853	M783T443	782.568	442.947	7.69563e+08	PC(36:4)+H	PC(36:4)+H	PC	C44 H81 O8 N1 P1	782.569	C	782.568	-1.55	442.947	782.567	-2.91	442.83	0.528022	1.0721	0.589492	1.04548	0.329602	0.988485	0.0206107	0.970683	0.755837	1.01182	0.247649	1.05536	NA	0.960862	NA	0.888517	0.940087	0.997262	0.117757	0.922401	NA	NA	NA	0.936588	NA	0.891671
POSITIVE ION LIPIDS	8638	M769T473	768.589	473.38	4.98392e+08	PC(36:4e)+H	PC(36:4e)+H	PC	C44 H83 O7 N1 P1	768.59	C	768.589	-1.38	473.38	768.59	-0.05	472.98	0.277229	1.1655	0.521223	1.08879	0.0228348	0.957918	0.0457822	0.972109	0.85063	1.00326	0.46122	1.02173	0.281904	0.969285	0.433906	0.966501	0.8217	1.00933	0.121117	0.948954	0.55808	1.08576	0.515471	1.02277	0.444679	0.942021
POSITIVE ION LIPIDS	8821	M781T437	780.553	437.172	5.51011e+08	PC(36:5)+H	PC(36:5)+H	PC	C44 H79 O8 N1 P1	780.554	C	780.553	-1.41	437.172	780.554	-0.06	431.315	0.0778478	1.24076	0.267658	1.12354	0.924913	0.995639	0.940209	0.996599	0.105237	1.07188	0.249093	1.1069	0.109353	0.91302	0.571628	0.972626	0.356289	1.08121	0.102147	0.904298	0.696828	1.08932	0.962785	0.994805	0.599073	0.926865
POSITIVE ION LIPIDS	8609	M767T469	766.574	468.865	3.28571e+08	PC(36:5e)+H	PC(36:5e)+H	PC	C44 H81 O7 N1 P1	766.575	C	766.574	-1.14	468.865	766.575	0.28	468.75	0.16897	1.17976	0.249522	1.13038	0.118595	0.972312	0.252343	0.981485	0.716305	1.0136	0.420758	1.03572	0.105221	0.956797	0.515262	0.97225	0.868965	0.993872	0.242962	0.957017	0.531557	1.08825	0.540642	1.02288	0.446249	0.942599
POSITIVE ION LIPIDS	8796	M779T419	778.538	419.134	1.04374e+07	PC(36:6)+H	PC(36:6)+H	PC	C44 H77 O8 N1 P1	778.538	C	778.538	-0.75	419.134	778.536	-2.83	419.31	0.119326	1.21004	0.0483262	1.20598	0.28427	0.932097	0.133137	0.897825	0.495505	1.13463	0.382221	1.11348	0.761469	1.0364	0.202023	1.16047	0.183201	1.10747	0.257947	0.914527	0.329075	1.27152	0.1202	1.09395	NA	0.931157
POSITIVE ION LIPIDS	8579	M765T450	764.557	449.789	2.42932e+07	PC(36:6e)+H	PC(36:6e)+H	PC	C44 H79 O7 N1 P1	764.559	C	764.557	-1.82	449.789	764.559	0.17	449.52	0.107417	1.2197	0.224758	1.13862	0.694578	0.990658	0.16986	0.974172	0.273845	0.97736	0.582807	1.01451	0.196561	0.964386	0.972817	0.997365	0.413504	0.952303	0.15962	0.907196	0.490331	1.1344	0.43737	1.03887	0.399683	0.920607
POSITIVE ION LIPIDS	9162	M803T513	802.631	513.354	7.58945e+06	PC(37:1)+H	PC(37:1)+H	PC	C45 H89 O8 N1 P1	802.632	C	802.631	-1.08	513.354	802.632	-0.17	512.61	0.540002	1.16268	0.959319	1.01363	0.000517588	0.791196	0.22078	0.969182	0.651429	1.00975	0.410587	1.02759	0.0320012	0.940508	0.693901	0.974956	0.647793	0.981628	0.0922165	0.929855	0.457913	1.14734	0.293367	1.06348	0.50668	0.935581
POSITIVE ION LIPIDS	9128	M801T497	800.615	496.739	3.22519e+07	PC(37:2)+H	PC(37:2)+H	PC	C45 H87 O8 N1 P1	800.616	C	800.615	-2.05	496.739	800.616	-0.12	496.62	0.31733	1.23161	0.770511	1.0603	0.00536387	0.8584	0.516632	0.97432	0.917112	0.996818	0.381132	1.03455	0.0685419	0.930706	0.547549	0.963714	0.598707	1.01728	0.00972831	0.938063	0.439214	1.13171	0.516674	1.03334	0.453924	0.952128
POSITIVE ION LIPIDS	9044	M797T469	796.583	468.809	1.09899e+08	PC(37:4)+H	PC(37:4)+H	PC	C45 H83 O8 N1 P1	796.585	C	796.583	-2.78	468.809	796.585	-0.31	469.65	0.149235	1.2362	0.537749	1.06454	0.054374	0.969219	0.132309	0.972905	0.885228	1.00466	0.518861	1.02321	0.0383244	0.935221	0.281811	0.960644	0.799989	0.989014	0.205242	0.943291	0.486425	1.09506	0.585953	1.0223	0.391154	0.936588
POSITIVE ION LIPIDS	8827	M781T478	780.589	477.73	2.48965e+07	PC(37:5e)+H	PC(37:5e)+H	PC	C45 H83 O7 N1 P1	780.59	C	780.589	-1.51	477.73	780.59	0.33	477	0.163352	1.23821	0.329781	1.11168	0.0130056	0.947084	0.00803773	0.957776	0.517394	1.02109	0.42155	1.03431	0.238051	0.960213	0.33991	0.94683	0.743834	1.01639	0.217503	0.942736	0.441326	1.12136	0.627702	1.02688	0.474996	0.941092
POSITIVE ION LIPIDS	8981	M793T434	792.552	434.353	9.5787e+06	PC(37:6)+H	PC(37:6)+H	PC	C45 H79 O8 N1 P1	792.554	C	792.552	-1.87	434.353	792.554	-0.17	434.16	0.135886	1.24533	0.288427	1.13284	0.104174	0.851048	0.0876063	0.839475	0.407084	0.916099	0.673275	0.959484	0.719468	0.980643	0.456202	0.954791	0.795148	0.986635	0.049695	0.89277	0.897267	1.02046	0.281238	1.09585	0.446197	1.09118
POSITIVE ION LIPIDS	9341	M813T491	812.615	491.172	1364929077	PC(38:3)+H	PC(38:3)+H	PC	C46 H87 O8 N1 P1	812.616	C	812.615	-1.68	491.172	812.616	-0.18	490.74	0.965843	0.984617	0.954791	1.02306	0.00232197	0.924597	0.0937516	0.782349	0.136593	1.25792	0.000240604	1.39217	0.269944	1.13591	0.191039	1.16987	0.246437	1.10383	0.713386	1.04179	0.289578	1.10614	0.0622478	1.27497	0.529874	0.953987
POSITIVE ION LIPIDS	9088	M799T507	798.635	506.642	2.32426e+07	PC(38:3e)+H	PC(38:3e)+H	PC	C46 H89 O7 N1 P1	798.637	C	798.635	-2.11	506.642	798.637	-0.13	504.9	0.34021	1.20427	0.837652	1.03924	0.0014665	0.876703	0.163339	0.963097	0.59099	1.00975	0.389167	1.03822	0.0373616	0.950786	0.421361	0.969013	0.56173	0.974814	0.0137143	0.92607	0.431754	1.13275	0.419015	1.03233	0.375216	0.921627
POSITIVE ION LIPIDS	9686	M833T480	832.581	479.705	102082953	PC(38:4)+Na	PC(38:4)+Na	PC	C46 H84 O8 N1 P1 Na1	832.583	C	832.581	-2.41	479.705	832.583	-0.07	474.957	0.203705	1.11559	0.45597	1.06525	0.272767	0.886017	0.247896	0.87897	0.349357	1.10589	0.99379	1.00015	0.404921	1.07932	0.377394	0.984674	0.43729	0.932848	0.508019	0.943548	0.446239	1.11745	0.120934	0.9467	0.407009	0.904656
POSITIVE ION LIPIDS	9047	M797T496	796.62	496.248	2.77626e+08	PC(38:4e)+H	PC(38:4e)+H	PC	C46 H87 O7 N1 P1	796.621	C	796.62	-1.67	496.248	796.621	-0.04	490.11	0.266279	1.23023	0.306512	1.15212	0.873385	1.01041	0.704661	0.965858	0.117948	1.12512	0.826393	1.0192	0.757664	0.973905	0.730285	0.972474	0.999404	0.999946	0.0936875	0.876391	0.565481	1.09923	0.447083	1.07428	0.105608	0.880683
POSITIVE ION LIPIDS	9274	M809T458	808.583	457.951	7.7303e+08	PC(38:5)+H	PC(38:5)+H	PC	C46 H83 O8 N1 P1	808.585	C	808.583	-2.25	457.951	808.585	-0.21	458.73	0.0636964	1.1698	0.0619651	1.13355	0.869939	0.993122	0.386552	0.965746	0.028149	1.35922	0.160551	1.07856	0.862036	0.967618	0.979995	0.9955	0.595291	0.97856	0.165799	0.939516	0.480848	1.07088	0.692232	1.00993	0.61158	1.09419
POSITIVE ION LIPIDS	9013	M795T475_2	794.604	474.809	3.67065e+08	PC(38:5e)+H	PC(38:5e)+H	PC	C46 H85 O7 N1 P1	794.606	C	794.604	-1.87	474.809	794.606	-0.04	474.27	0.203978	1.17519	0.428547	1.09166	0.145592	0.974407	0.0595516	0.975628	0.199932	1.0273	0.272971	1.03661	0.327152	0.973212	0.565704	0.97356	0.816313	1.00911	0.0625561	0.950087	0.51773	1.09648	0.688036	1.01518	0.38929	0.929182
POSITIVE ION LIPIDS	9237	M807T448	806.568	448.016	1502281620	PC(38:6)+H	PC(38:6)+H	PC	C46 H81 O8 N1 P1	806.569	C	806.568	-1.39	448.016	806.569	-0.08	447.87	0.225671	1.22588	0.863518	1.01965	0.455364	0.926927	0.414722	1.05221	0.00158676	1.23534	0.116143	1.08454	0.628883	1.0468	0.800516	0.977239	0.436803	0.914414	0.263714	0.873276	0.731636	1.06641	0.477145	1.04926	0.614266	0.933758
POSITIVE ION LIPIDS	9194	M805T429	804.552	428.596	3.77661e+07	PC(38:7)+H	PC(38:7)+H	PC	C46 H79 O8 N1 P1	804.554	C	804.552	-1.79	428.596	804.554	-0.24	429.54	NA	NA	0.828409	0.955186	0.0523146	0.939001	0.00453308	0.948854	0.745777	1.01192	0.147817	1.0573	0.240416	0.974654	0.291203	0.939532	0.913279	0.994314	0.0477647	0.919202	0.491316	1.12291	0.296545	1.06678	NA	1.06884
POSITIVE ION LIPIDS	9504	M823T470	822.599	469.544	1.6452e+07	PC(39:5)+H	PC(39:5)+H	PC	C47 H85 O8 N1 P1	822.601	C	822.599	-2.52	469.544	822.601	-0.08	469.71	0.0932764	1.17589	0.391566	1.06765	0.0410424	0.933892	NA	1.00691	0.2151	1.03327	0.131715	1.05343	0.00631215	0.952084	0.738149	0.984378	0.557041	0.971888	0.413431	0.961838	0.52166	1.09897	0.750304	0.990803	0.619861	0.941228
POSITIVE ION LIPIDS	9460	M821T459	820.582	459.182	1.21356e+07	PC(39:6)+H	PC(39:6)+H	PC	C47 H83 O8 N1 P1	820.585	C	820.582	-3.38	459.182	820.585	-0.29	460.05	0.094931	1.16964	0.23904	1.07491	0.391636	1.02545	0.128467	1.04342	0.106608	1.03337	0.014651	1.08375	0.162279	0.942836	0.376748	0.97593	0.382202	1.04522	0.986832	0.99923	0.568715	1.06316	0.92222	0.99711	0.303033	1.17808
POSITIVE ION LIPIDS	9871	M843T526	842.662	525.9	4.40479e+06	PC(40:2)+H	PC(40:2)+H	PC	C48 H93 O8 N1 P1	842.663	C	842.662	-1.48	525.9	842.663	-0.21	525.9	0.766995	1.09788	0.689698	0.872532	0.000330372	0.810099	0.391757	0.970386	0.631388	0.980841	0.944076	1.00359	0.415197	0.972278	0.553004	1.06437	0.480263	1.04391	0.306709	0.937468	0.396318	1.14536	0.333378	1.08985	0.552141	0.945905
POSITIVE ION LIPIDS	9805	M839T497	838.631	496.908	1.82819e+08	PC(40:4)+H	PC(40:4)+H	PC	C48 H89 O8 N1 P1	838.632	C	838.631	-1.71	496.908	838.632	-0.21	496.62	0.20927	1.28193	0.646031	1.08857	0.968062	0.993339	0.849028	0.968972	0.792453	1.00623	0.10592	1.23219	0.177151	0.855833	0.665061	0.954667	0.941588	0.997263	0.0533533	0.918127	0.890774	1.03717	0.69514	0.941732	0.778316	1.05131
POSITIVE ION LIPIDS	9932	M847T517	846.633	516.82	8.95523e+06	PC(40:4e)+Na	PC(40:4e)+Na	PC	C48 H90 O7 N1 P1 Na1	846.635	C	846.633	-1.48	516.82	846.635	-0.15	511.14	NA	NA	NA	NA	NA	NA	NA	NA	0.984118	1.00315	0.753395	1.04517	0.754529	0.951177	0.791078	0.969907	0.350425	0.877766	0.558952	0.911711	0.471549	1.26153	0.0509054	1.08912	0.481186	0.924014
POSITIVE ION LIPIDS	9506	M823T496	822.635	496.344	6.914e+07	PC(40:5e)+H	PC(40:5e)+H	PC	C48 H89 O7 N1 P1	822.637	C	822.635	-2.24	496.344	822.637	0.03	490.98	0.109985	1.35744	0.418392	1.12301	0.00318766	0.943888	0.389095	0.987383	0.77803	1.00688	0.224634	1.04139	0.0767419	0.927023	0.541674	0.967859	0.854927	0.993701	0.0373034	0.908601	0.31401	1.19006	0.326986	1.06153	0.45553	0.933334
POSITIVE ION LIPIDS	9724	M835T473	834.599	472.898	476666185	PC(40:6)+H	PC(40:6)+H	PC	C48 H85 O8 N1 P1	834.601	C	834.599	-1.77	472.898	834.601	-0.16	472.95	0.231137	1.20682	0.544489	1.08987	0.0626142	0.962997	0.637628	1.01837	0.576419	0.987707	0.429329	1.03708	0.272922	1.03184	0.470609	0.970067	0.677417	1.01789	0.543062	0.976465	0.421575	1.11635	0.407335	1.02737	0.638704	0.956942
POSITIVE ION LIPIDS	9725	M835T459	834.598	459.373	4.33457e+07	PC(40:6)+H	PC(40:6)+H	PC	C48 H85 O8 N1 P1	834.601	C	834.598	-2.79	459.373	834.601	-0.27	458.85	0.0375813	1.20929	0.141479	1.11498	0.699713	0.995229	0.919589	1.00165	0.158588	1.04469	0.2965	1.02683	NA	0.954776	0.434993	0.970762	0.958528	1.00206	0.314441	0.957832	NA	1.19321	0.93197	1.00276	0.211026	0.912904
POSITIVE ION LIPIDS	9462	M821T476	820.619	476.387	4.00273e+07	PC(40:6e)+H	PC(40:6e)+H	PC	C48 H87 O7 N1 P1	820.621	C	820.619	-2.78	476.387	820.621	-0.14	476.94	0.158636	1.2381	0.30327	1.10978	0.697838	0.935619	0.561331	1.18927	0.712974	1.04365	0.275689	1.11203	0.312256	0.910002	0.484614	0.936149	0.131131	1.22728	0.69298	1.05134	0.984663	1.00425	0.556522	1.07677	0.539197	0.938413
POSITIVE ION LIPIDS	10036	M855T451	854.565	450.938	1.27247e+07	PC(18:1_22:6)+Na	PC(40:7)+Na	PC	C48 H82 O8 N1 P1 Na1	854.567	B	854.565	-2	450.938	854.567	-0.21	450.69	0.146593	1.21594	0.0379353	1.2554	0.853295	0.990781	0.809253	0.988403	0.435809	0.974258	0.21822	0.974298	0.215242	0.930154	0.154798	0.922622	0.677612	1.02199	0.341438	0.95362	0.719112	1.04515	0.719063	0.969504	0.14383	0.889718
POSITIVE ION LIPIDS	9644	M831T429	830.568	428.799	7.52889e+07	PC(40:8)+H	PC(40:8)+H	PC	C48 H81 O8 N1 P1	830.569	C	830.568	-1.68	428.799	830.569	-0.19	429.51	0.0772616	1.25565	0.446739	1.08995	0.180082	0.927025	0.433745	0.955678	0.155045	0.936892	0.499943	1.02685	0.263267	0.933236	0.48579	0.943866	0.721788	1.01955	0.297427	0.954749	0.368964	1.19332	0.112186	1.13109	0.568058	0.928276
POSITIVE ION LIPIDS	10306	M871T544	870.693	543.624	2.77215e+06	PC(42:2)+H	PC(42:2)+H	PC	C50 H97 O8 N1 P1	870.695	C	870.693	-1.32	543.624	870.695	0	543.03	0.87125	1.08502	0.488533	0.662658	0.000274319	0.685496	0.383026	0.958572	0.0301942	0.897307	0.0579043	0.906734	0.319755	0.98316	0.972011	0.997923	0.766845	0.98483	0.159522	0.923505	0.35104	1.20319	0.324791	1.0576	0.508457	0.924049
POSITIVE ION LIPIDS	10075	M857T556	856.714	556.062	4.55208e+06	PC(42:2e)+H	PC(42:2e)+H	PC	C50 H99 O7 N1 P1	856.715	C	856.714	-1.1	556.062	856.715	-0.13	556.11	0.838151	0.902446	0.370938	0.572878	0.326953	0.668035	0.593591	0.899532	0.197198	0.938997	0.0976545	0.93631	0.269796	0.951485	0.456208	0.954985	0.227802	0.931806	0.0247292	0.892124	0.344861	1.18713	0.0217013	1.12438	0.358337	0.918691
POSITIVE ION LIPIDS	10242	M867T513	866.663	513.043	3.94898e+06	PC(42:4)+H	PC(42:4)+H	PC	C50 H93 O8 N1 P1	866.663	C	866.663	-0.77	513.043	866.663	-0.09	512.7	0.183032	1.36029	0.999149	0.999715	0.00112878	0.836562	0.172119	0.954736	0.306889	1.05048	0.0808343	1.02926	0.574421	1.12974	0.638112	0.965183	0.37013	0.961304	0.624152	1.06814	0.489433	1.14082	0.103928	1.09153	0.437216	0.923046
POSITIVE ION LIPIDS	10013	M853T535	852.683	535.229	2.52168e+07	PC(42:4e)+H	PC(42:4e)+H	PC	C50 H95 O7 N1 P1	852.684	C	852.683	-1.14	535.229	852.684	-0.12	534.87	0.364748	1.27325	0.750375	0.929031	0.311156	0.890665	0.301925	1.11318	0.6029	1.05764	0.451878	0.890991	0.766815	0.962479	0.418652	0.917119	0.362946	0.80872	0.892827	0.975114	0.820984	1.08061	0.341549	1.15993	0.832689	0.962245
POSITIVE ION LIPIDS	10204	M865T498	864.646	498.495	8.43029e+06	PC(42:5)+H	PC(42:5)+H	PC	C50 H91 O8 N1 P1	864.648	C	864.646	-1.39	498.495	864.648	-0.15	497.64	0.17877	1.3303	0.584298	1.109	0.000825798	0.89998	0.106082	0.968664	0.882858	0.99498	0.735882	1.01399	0.0367905	0.930399	0.488363	0.957523	0.806223	1.00782	0.00317872	0.906041	0.665082	1.0822	0.483164	1.04806	0.39431	0.919266
POSITIVE ION LIPIDS	9960	M849T499	848.651	498.751	2.5106e+07	PC(42:6e)+H	PC(42:6e)+H	PC	C50 H91 O7 N1 P1	848.653	C	848.651	-1.95	498.751	848.653	-0.11	498.18	0.117664	1.33148	0.315697	1.18709	0.00318905	0.919518	0.290203	0.976686	0.576736	1.01145	0.703597	1.01202	0.160203	0.941104	0.616051	0.975121	0.413737	0.974714	0.327384	0.939543	0.414275	1.15335	0.286131	1.06774	0.242698	0.908564
POSITIVE ION LIPIDS	10103	M859T451	858.599	451.14	6.25054e+06	PC(42:8)+H	PC(42:8)+H	PC	C50 H85 O8 N1 P1	858.601	C	858.599	-1.79	451.14	858.601	-0.21	450.63	0.112457	1.24455	0.20159	1.13417	0.626758	0.97855	0.664356	0.985748	0.81094	0.989715	0.880136	0.995224	0.108212	0.979828	0.196395	1.05339	0.0953459	0.907139	0.0233532	0.83837	0.775583	1.04302	0.974776	1.00195	0.518902	0.927057
POSITIVE ION LIPIDS	10660	M895T539	894.693	539.259	1.79644e+06	PC(44:4)+H	PC(44:4)+H	PC	C52 H97 O8 N1 P1	894.695	C	894.693	-2.22	539.259	894.695	-0.14	538.92	0.987408	0.993111	0.51157	0.66932	0.00181122	0.561211	0.0892815	0.828021	0.167255	0.905699	0.531796	0.939621	0.184507	0.904929	0.0854575	0.857693	0.504359	0.964055	0.844658	1.01884	0.880119	1.04495	0.771163	1.03059	0.400872	0.860231
POSITIVE ION LIPIDS	10416	M879T535	878.699	534.694	4.71853e+07	PC(44:5e)+H	PC(44:5e)+H	PC	C52 H97 O7 N1 P1	878.7	C	878.699	-1.14	534.694	878.7	-0.09	534.3	0.893332	0.957708	0.50206	0.783841	0.0125979	0.717014	0.041798	0.931967	0.115804	0.835763	0.0958279	0.838357	0.0919289	0.950419	0.856384	0.988856	0.395039	0.886815	0.913633	0.98164	0.48806	1.13722	0.252459	1.06763	0.509431	0.933126
POSITIVE ION LIPIDS	10389	M877T518	876.683	518.19	3.80112e+07	PC(44:6e)+H	PC(44:6e)+H	PC	C52 H95 O7 N1 P1	876.684	C	876.683	-1.34	518.19	876.684	-0.19	517.62	0.286016	1.27516	0.834113	1.04729	0.000131993	0.853685	0.0180523	0.944048	0.616091	1.01766	0.280962	1.0337	0.0327354	0.93549	0.6958	0.974923	0.64585	0.976759	0.101515	0.915738	0.524842	1.13335	0.325647	1.06299	0.312797	0.905193
POSITIVE ION LIPIDS	7993	M719T484	718.537	484.39	7.91656e+06	PE(34:1)+H	PE(34:1)+H	PE	C39 H77 O8 N1 P1	718.538	C	718.537	-1.53	484.39	718.538	-0.35	484.29	0.941663	1.01825	0.618768	0.870294	0.0159512	0.838172	0.869462	0.991864	0.193493	0.958383	0.717742	1.0089	0.432462	0.970697	0.710006	0.981069	0.217209	1.06196	0.59513	0.991635	0.687394	1.05433	0.720422	1.01826	0.511801	0.948922
POSITIVE ION LIPIDS	7775	M703T496	702.542	496.368	8.34918e+06	PE(16:0p_18:1)+H	PE(34:1p)+H	PE	C39 H77 O7 N1 P1	702.543	A	702.542	-1.47	496.368	702.543	-0.15	496.26	0.615522	1.10662	0.734262	0.925427	0.00013457	0.76697	0.278642	0.98655	0.293303	0.973665	0.567117	1.00981	0.00121113	0.912866	0.499091	0.949752	0.752252	0.981346	0.0983691	0.893986	0.5889	1.12234	0.420361	1.05076	0.5178	0.928132
POSITIVE ION LIPIDS	7738	M701T478	700.527	477.735	1.90238e+07	PE(16:0p_18:2)+H	PE(34:2p)+H	PE	C39 H75 O7 N1 P1	700.528	A	700.527	-1.44	477.735	700.527	-0.14	477.66	0.722284	1.08508	0.90693	0.973715	0.00329041	0.829173	0.61796	0.986404	0.836968	1.0086	0.314365	1.03281	0.166685	0.953977	0.358746	0.940319	0.24024	1.06337	0.587272	0.972795	0.479723	1.13048	0.624493	1.03243	0.456677	0.92713
POSITIVE ION LIPIDS	8633	M769T484	768.553	483.685	6.32752e+07	PE(18:0_18:1)+Na	PE(36:1)+Na	PE	C41 H80 O8 N1 P1 Na1	768.551	B	768.553	1.77	483.685	768.551	-0.17	483.57	0.468549	1.17506	0.992573	1.00214	0.00474007	0.864116	0.792227	0.99091	0.06962	0.961702	0.227544	0.975666	0.347536	0.978181	0.627488	0.981812	0.164093	1.07559	0.493611	0.985797	0.494497	1.09525	0.700815	0.97918	0.449837	0.937262
POSITIVE ION LIPIDS	8162	M731T515	730.573	515.487	8.69686e+06	PE(18:0p_18:1)+H	PE(36:1p)+H	PE	C41 H81 O7 N1 P1	730.575	A	730.573	-1.4	515.487	730.574	-0.12	515.43	0.588101	1.15773	0.887792	0.953649	0.845483	0.944079	0.247802	1.27749	0.377535	0.926767	0.365631	0.92421	0.323506	0.95984	0.798614	0.982216	0.372988	0.927248	0.321044	0.910466	0.682889	1.10547	0.308849	1.08358	0.451769	0.900515
POSITIVE ION LIPIDS	8337	M745T488	744.553	488.006	4.63734e+07	PE(18:0_18:2)+H	PE(36:2)+H	PE	C41 H79 O8 N1 P1	744.554	B	744.553	-1.19	488.006	744.554	-0.21	488.07	0.640687	1.12768	0.924662	0.966562	0.000352145	0.817975	0.540019	0.98505	0.222698	0.98424	0.863132	1.00289	0.143524	0.944407	0.800746	0.987662	0.713444	1.01827	0.10409	0.940641	0.587829	1.09691	0.901021	1.00528	0.321771	0.930011
POSITIVE ION LIPIDS	8604	M767T463	766.537	462.722	1.4006e+07	PE(18:1_18:1)+Na	PE(36:2)+Na	PE	C41 H78 O8 N1 P1 Na1	766.536	A	766.537	1.04	462.722	766.535	-0.31	462.96	0.019876	1.41178	0.0128181	1.34161	0.0542174	0.932822	0.505572	0.979863	0.371787	0.835673	0.925925	0.997477	0.280581	0.956172	0.80685	1.00671	0.43861	0.959143	0.0209432	0.866831	0.426958	1.11981	0.721124	1.01633	0.436683	0.932892
POSITIVE ION LIPIDS	8138	M729T499	728.558	499.213	3.97992e+07	PE(18:0p_18:2)+H	PE(36:2p)+H	PE	C41 H79 O7 N1 P1	728.559	A	728.558	-1.09	499.213	728.559	-0.11	499.26	0.390804	1.23226	0.991924	1.00267	0.000486176	0.774488	0.677467	1.01554	0.0492829	0.95626	0.294149	0.969847	0.0792098	0.931888	0.750414	0.977793	0.93016	1.00355	0.0247152	0.888581	0.521475	1.15241	0.311849	1.07691	0.442215	0.920202
POSITIVE ION LIPIDS	8316	M743T468	742.537	468.127	1.51283e+07	PE(36:3)+H	PE(36:3)+H	PE	C41 H77 O8 N1 P1	742.538	C	742.537	-1.83	468.127	742.538	-0.15	467.49	0.260323	1.23098	0.535866	1.11058	0.00159761	0.888102	0.110791	0.975925	0.258508	1.02371	0.311395	1.04011	0.11637	0.961037	0.813438	0.983899	0.795702	0.987658	0.223192	0.950846	0.56713	1.08879	0.21118	1.04668	0.281371	0.911354
POSITIVE ION LIPIDS	8280	M741T460	740.522	460.123	1.91344e+07	PE(16:0_20:4)+H	PE(36:4)+H	PE	C41 H75 O8 N1 P1	740.522	B	740.522	-0.72	460.123	740.522	-0.12	460.14	0.553652	1.10286	0.452362	1.13102	0.649981	1.03101	0.343938	1.03723	0.418335	1.04133	0.458423	0.977397	0.303327	1.09009	0.59485	1.02282	0.566611	1.04033	0.869749	0.99296	0.908885	1.0171	0.964882	1.00267	0.69844	0.953868
POSITIVE ION LIPIDS	8080	M725T473	724.527	472.537	7.04552e+07	PE(16:0p_20:4)+H	PE(36:4p)+H	PE	C41 H75 O7 N1 P1	724.528	A	724.527	-1.42	472.537	724.527	-0.14	472.53	0.421738	1.17611	0.795118	1.0525	0.0115423	0.895528	0.664852	0.988886	0.311274	0.973388	0.940782	0.998007	0.349468	0.960983	0.394131	0.956601	0.952162	0.996988	0.109308	0.936409	0.581787	1.09603	0.324633	1.04774	0.208172	0.899767
POSITIVE ION LIPIDS	8410	M751T475	750.542	474.625	8.12717e+07	PE(16:0p_22:5)+H	PE(38:5p)+H	PE	C43 H77 O7 N1 P1	750.543	A	750.542	-1.36	474.625	750.543	-0.06	474.78	0.323758	1.20483	0.736691	1.06061	0.00217963	0.915788	0.863736	1.00712	0.42058	1.01762	0.353744	1.02729	0.356306	0.970232	0.973622	1.00298	0.789207	1.02033	0.00310399	0.918713	0.496942	1.14282	0.557548	1.02771	0.319999	0.910939
POSITIVE ION LIPIDS	8386	M749T464	748.526	463.825	2.09442e+07	PE(16:0p_22:6)+H	PE(38:6p)+H	PE	C43 H75 O7 N1 P1	748.528	A	748.526	-1.7	463.825	748.527	-0.15	463.83	0.42338	1.13002	0.853642	0.961574	0.386528	0.947966	0.869476	0.991736	0.940294	0.997425	0.419435	0.976671	0.798677	0.989833	0.869619	0.989919	0.17603	0.952284	0.486823	0.937206	0.716674	1.06285	0.769342	1.02411	0.84566	0.983101
POSITIVE ION LIPIDS	8798	M779T494	778.574	493.881	1.95658e+07	PE(18:0p_22:5)+H	PE(40:5p)+H	PE	C45 H81 O7 N1 P1	778.575	A	778.574	-1.23	493.881	778.574	-0.16	493.89	NA	0.805359	NA	0.838923	0.00159795	0.825138	0.144945	0.967061	0.469609	1.00782	0.507798	1.01393	0.440343	0.95955	0.0944495	0.925091	0.904665	1.00496	0.0436272	0.927198	0.52126	1.124	0.399021	1.04677	0.489454	0.932259
POSITIVE ION LIPIDS	8755	M777T487	776.558	486.842	1.79875e+07	PE(18:0p_22:6)+H	PE(40:6p)+H	PE	C45 H79 O7 N1 P1	776.559	A	776.558	-0.62	486.842	776.559	0.11	486.69	0.369234	1.21473	0.889081	0.966716	0.0853821	0.884485	0.653364	1.07845	0.403917	1.1451	0.911181	0.999134	0.754625	1.02809	0.472762	1.088	0.818908	1.02446	0.126193	0.866586	0.756527	1.04029	0.751289	0.975522	0.0928569	0.876932
POSITIVE ION LIPIDS	8725	M775T466	774.543	466.087	1.15164e+07	PE(18:1p_22:6)+H	PE(40:7p)+H	PE	C45 H77 O7 N1 P1	774.543	A	774.543	-0.64	466.087	774.543	-0.07	466.14	0.0881904	1.23476	0.2246	1.16048	0.0993685	0.880377	0.912443	0.99552	0.718872	0.970901	0.499896	1.05729	0.813306	1.01509	0.575981	1.05126	0.826073	1.02442	0.0429416	0.865469	0.592212	1.11988	0.116689	0.901359	0.198879	0.866879
POSITIVE ION LIPIDS	10008	M853T439	852.558	438.584	6.28084e+06	PI(16:0_18:2)+NH4	PI(34:2)+NH4	PI	C43 H83 O13 N1 P1	852.56	B	852.558	-2.32	438.584	852.559	-0.25	438.18	0.512347	1.12668	0.763408	1.06257	0.0113954	0.816282	0.263932	0.950928	0.712732	0.9785	0.812394	1.0106	0.168833	0.946982	0.427516	0.949108	0.742544	1.01887	0.102264	0.90339	0.551895	1.12739	0.259372	0.895204	0.67027	1.04831
POSITIVE ION LIPIDS	10409	M879T442	878.573	442.181	3.75053e+06	PI(36:3)+NH4	PI(36:3)+NH4	PI	C45 H85 O13 N1 P1	878.575	C	878.573	-2.75	442.181	878.575	-0.35	441.21	0.86137	0.976223	0.684059	0.933203	8.32182e-05	0.839137	0.112375	0.955183	0.047242	0.980672	0.0617104	1.07444	0.183002	0.953226	0.680573	0.962134	0.941904	0.995357	0.245689	0.930646	0.594082	1.12074	0.95291	0.99523	0.686937	0.967699
POSITIVE ION LIPIDS	10384	M877T434	876.559	433.59	5.99869e+06	PI(16:0_20:4)+NH4	PI(36:4)+NH4	PI	C45 H83 O13 N1 P1	876.56	B	876.559	-1.3	433.59	876.56	-0.16	433.658	NA	NA	NA	NA	0.000550488	0.809854	0.124156	0.961339	0.718896	1.01468	0.348507	1.03564	0.073715	0.949333	0.87057	0.985519	0.995463	1.00038	0.123829	0.903034	0.597303	1.1214	0.2899	0.899559	0.793665	0.973867
POSITIVE ION LIPIDS	10802	M905T459	904.589	459.047	6.54701e+07	PI(18:0_20:4)+NH4	PI(38:4)+NH4	PI	C47 H87 O13 N1 P1	904.591	B	904.589	-2.14	459.047	904.591	-0.07	459	0.32635	1.18482	0.863738	1.03234	0.000431433	0.822181	0.912813	1.00274	0.392128	1.01837	0.280757	1.02006	0.975604	1.00125	0.857297	1.01036	0.224367	1.04531	0.418679	0.972383	0.561552	1.10081	0.11038	0.835285	0.828612	1.01883
POSITIVE ION LIPIDS	10772	M903T438	902.573	437.707	4.22934e+06	PI(18:1_20:4)+NH4	PI(38:5)+NH4	PI	C47 H85 O13 N1 P1	902.575	B	902.573	-2.4	437.707	902.575	-0.17	436.8	NA	NA	NA	NA	0.00436219	0.836276	0.0727502	0.932177	0.585997	0.985917	0.286532	1.06435	0.289396	0.971342	0.840929	0.983745	0.952102	1.0037	0.0750102	0.901538	0.551672	1.15112	0.351944	0.902073	0.945186	1.0065
POSITIVE ION LIPIDS	10741	M901T425	900.559	424.946	1.51682e+06	PI(38:6)+NH4	PI(38:6)+NH4	PI	C47 H83 O13 N1 P1	900.56	C	900.559	-1.06	424.946	900.559	-0.19	425.01	0.218348	1.65519	0.156486	1.41168	0.0478909	0.867612	0.803138	0.990072	0.611707	1.02911	0.518015	1.03881	0.206242	0.964629	0.569005	0.966012	0.690426	0.973019	0.316507	0.932566	0.555904	1.11705	0.26292	0.878402	0.898605	0.989314
POSITIVE ION LIPIDS	7047	M648T383	647.512	383.432	5.30131e+06	SM(d30:1)+H	SM(d30:1)+H	SM	C35 H72 O6 N2 P1	647.512	C	647.512	-0.5	383.432	647.512	-0.06	383.16	0.930656	0.984298	0.764751	0.945634	0.00775169	0.919815	0.345193	0.986151	0.431351	1.0361	0.155085	1.06121	0.0218342	0.929648	0.777326	0.982222	0.989039	0.999154	0.0954215	0.902937	0.43293	1.1574	0.379267	1.07294	0.767144	1.02538
POSITIVE ION LIPIDS	7217	M662T405	661.528	405.064	2.26578e+06	SM(d31:1)+H	SM(d31:1)+H	SM	C36 H74 O6 N2 P1	661.528	C	661.528	-0.52	405.064	661.528	-0.06	404.97	0.800169	0.9392	0.692458	0.904929	0.000199616	0.857182	0.696801	0.995072	0.691603	1.0137	0.186463	1.04909	0.164983	0.959581	0.943158	0.995227	0.678803	0.975348	0.0515099	0.887774	0.405108	1.16991	0.26594	1.0794	0.966895	1.00394
POSITIVE ION LIPIDS	7437	M678T437	677.558	436.6	5.79861e+06	SM(d32:0)+H	SM(d32:0)+H	SM	C37 H78 O6 N2 P1	677.559	C	677.558	-1.22	436.6	677.559	-0.12	436.11	0.677587	0.857604	0.579905	0.840891	0.00144031	0.886777	0.00602503	1.1825	0.0221204	0.940359	0.216232	0.96606	0.0328414	0.944471	0.915318	0.9927	0.819533	0.988076	0.0575429	0.876284	0.474115	1.1473	0.748702	1.0174	0.925238	0.990721
POSITIVE ION LIPIDS	7411	M676T424	675.543	423.957	2.48281e+08	SM(d32:1)+H	SM(d32:1)+H	SM	C37 H76 O6 N2 P1	675.544	C	675.543	-0.93	423.957	675.544	0.02	423.66	0.88853	0.964483	0.736196	0.911304	0.00530288	0.854746	0.0177142	1.07492	0.267525	1.02922	0.184775	1.03321	0.89532	0.995685	0.766117	0.979309	0.647777	1.02652	0.147687	0.9202	0.425705	1.13862	0.285022	1.06672	0.743469	1.02799
POSITIVE ION LIPIDS	7379	M674T389	673.528	389.153	1.14276e+07	SM(d32:2)+H	SM(d32:2)+H	SM	C37 H74 O6 N2 P1	673.528	C	673.528	-0.59	389.153	673.528	-0.07	388.8	0.690056	1.05621	0.869129	1.02192	0.0100268	0.951648	0.0981414	0.963703	0.461677	1.02931	0.198145	1.05606	0.0701946	0.932495	0.740714	0.976569	0.911164	1.0062	0.105422	0.916654	0.468976	1.14659	0.327524	1.06717	0.778518	1.0238
POSITIVE ION LIPIDS	7606	M690T440	689.558	440.304	8.6377e+07	SM(d33:1)+H	SM(d33:1)+H	SM	C38 H78 O6 N2 P1	689.559	C	689.558	-1.27	440.304	689.559	-0.06	440.25	0.591839	0.86892	0.659581	0.886886	1.18833e-06	0.811798	0.0015766	1.09436	0.00912246	0.954007	0.534634	0.993827	0.179193	0.968219	0.716321	0.975595	0.990629	0.999323	0.132084	0.917474	0.544477	1.11478	0.483712	1.05119	0.9867	0.998484
POSITIVE ION LIPIDS	7577	M688T410	687.543	409.806	1.91468e+06	SM(d33:2)+H	SM(d33:2)+H	SM	C38 H76 O6 N2 P1	687.544	C	687.543	-0.66	409.806	687.544	-0.04	409.5	0.894743	1.02353	0.870672	0.971719	0.0110495	0.927018	0.781852	0.994541	0.76539	1.0092	0.181825	1.06873	0.0240726	0.93131	0.682287	0.974941	0.811176	1.01293	0.0718253	0.90469	0.34421	1.17025	0.154081	1.08512	0.103421	1.11697
POSITIVE ION LIPIDS	7793	M704T455	703.574	454.654	1420876927	SM(d34:1)+H	SM(d34:1)+H	SM	C39 H80 O6 N2 P1	703.575	C	703.574	-1.42	454.654	703.575	-0.09	454.5	0.439966	0.821665	0.618025	0.883001	0.0238168	0.907599	0.0182816	1.18249	0.0715475	0.940106	0.0187426	0.925811	0.160368	0.962581	0.863529	0.991719	0.743581	0.990213	0.183166	0.958449	0.483678	1.07436	0.463711	1.01731	0.788447	1.0163
POSITIVE ION LIPIDS	7761	M702T427	701.558	427.278	8.08866e+08	SM(d18:1_16:1)+H	SM(d34:2)+H	SM	C39 H78 O6 N2 P1	701.559	B	701.558	-1.22	427.278	701.559	-0.06	427.38	0.690097	1.09833	0.936193	0.980081	0.0136371	0.91468	0.186362	1.02687	0.437551	1.02	0.362804	1.02764	0.216162	0.976734	0.707267	0.980243	0.673089	1.0218	0.2128	0.947496	0.43569	1.10932	0.224235	1.05756	0.746807	1.02552
POSITIVE ION LIPIDS	7951	M716T443	715.574	443.267	7.82977e+06	SM(d35:2)+H	SM(d35:2)+H	SM	C40 H80 O6 N2 P1	715.575	C	715.574	-1.07	443.267	715.575	-0.15	442.8	0.871163	1.0362	0.889611	0.970516	0.0181773	0.899128	0.314112	1.03033	0.667884	0.990404	0.210249	1.0411	0.126533	0.943505	0.796942	0.982775	0.631659	0.976624	0.107577	0.921054	0.50055	1.12669	0.559876	1.04236	0.802749	0.975789
POSITIVE ION LIPIDS	8200	M734T490	733.621	489.832	1.87719e+07	SM(d36:0)+H	SM(d36:0)+H	SM	C41 H86 O6 N2 P1	733.622	C	733.621	-1.11	489.832	733.622	-0.13	489.54	0.68086	0.922524	0.103382	1.36794	0.0298971	2.66914	6.64143e-05	1.98781	0.0230009	0.749852	0.0700483	0.714452	0.00984131	0.896856	0.646911	0.976459	0.76447	0.985479	0.0153114	0.915922	0.455288	1.11412	0.525066	1.0309	0.916736	0.992167
POSITIVE ION LIPIDS	8173	M732T481	731.605	480.776	2.18455e+08	SM(d36:1)+H	SM(d36:1)+H	SM	C41 H84 O6 N2 P1	731.606	C	731.605	-1.4	480.776	731.606	-0.07	480.36	0.343562	0.857481	0.896633	0.980337	0.0449783	1.29699	0.000778097	1.46763	0.0100333	0.803354	0.0783427	0.829789	0.00300982	0.932076	0.486573	0.979328	0.206926	1.04671	0.0507347	0.959132	0.357231	1.08567	0.625208	0.981549	0.894166	0.993025
POSITIVE ION LIPIDS	8152	M730T457	729.589	457.299	1.33193e+08	SM(d36:2)+H	SM(d36:2)+H	SM	C41 H82 O6 N2 P1	729.591	C	729.589	-1.86	457.299	729.59	-0.18	457.32	0.869366	0.972994	0.7678	0.94908	0.000534887	0.850903	0.0264209	1.03848	0.519564	1.01015	0.658502	1.00999	0.113553	0.96223	0.669393	0.982812	0.590051	0.981773	0.0754894	0.942996	0.478588	1.08181	0.875207	0.995818	0.619608	1.03293
POSITIVE ION LIPIDS	8127	M728T434	727.574	433.935	2.65973e+07	SM(d36:3)+H	SM(d36:3)+H	SM	C41 H80 O6 N2 P1	727.575	C	727.574	-1.32	433.935	727.575	-0.28	430.17	0.523638	1.11458	0.805764	1.04218	0.00175006	0.877875	0.11118	0.966603	0.782667	0.989117	0.28095	1.03834	0.0502403	0.947631	0.718138	0.976318	0.69154	1.02181	0.0575156	0.892052	0.549577	1.123	0.534404	1.0435	0.843122	0.981577
POSITIVE ION LIPIDS	8356	M746T492	745.621	492.344	2.16144e+07	SM(d37:1)+H	SM(d37:1)+H	SM	C42 H86 O6 N2 P1	745.622	C	745.621	-0.6	492.344	745.622	0.23	492.24	0.270011	0.76228	0.844415	1.0447	0.0241217	1.59663	0.0126281	1.75092	0.0441535	0.83009	0.060606	0.820931	0.0244728	0.9234	0.409027	0.974338	0.961136	0.998726	0.0112943	0.930066	0.547173	1.10185	0.440092	1.0372	0.720858	0.963587
POSITIVE ION LIPIDS	8544	M762T513	761.652	512.667	1.19992e+07	SM(d38:0)+H	SM(d38:0)+H	SM	C43 H90 O6 N2 P1	761.653	C	761.652	-1.38	512.667	761.653	-0.29	511.32	NA	NA	NA	NA	NA	NA	NA	NA	0.177045	0.870359	NA	0.932282	0.0103296	0.900115	0.708817	0.974655	0.983567	0.9989	0.136809	0.921731	0.398401	1.16067	0.166458	1.06505	0.696361	0.961681
POSITIVE ION LIPIDS	8518	M760T504	759.637	503.505	2.50359e+08	SM(d38:1)+H	SM(d38:1)+H	SM	C43 H88 O6 N2 P1	759.637	C	759.637	-0.96	503.505	759.637	-0.16	503.04	0.844319	0.975605	0.642613	1.06848	0.0293425	1.56993	0.000971742	1.62015	0.0267298	0.829158	0.0787908	0.811145	0.00450349	0.934494	0.453225	0.973855	0.704144	0.986052	0.115304	0.939854	0.391081	1.1171	0.520559	1.03095	0.520432	0.947792
POSITIVE ION LIPIDS	8491	M758T482	757.621	482.489	6.93701e+07	SM(d38:2)+H	SM(d38:2)+H	SM	C43 H86 O6 N2 P1	757.622	C	757.621	-0.89	482.489	757.622	-0.05	482.4	0.967296	1.00602	0.785954	0.95284	0.000628282	0.851483	0.0182038	1.09866	0.182109	0.961376	0.32761	0.987125	0.0109333	0.941507	0.364044	0.963271	0.393672	1.0403	0.265209	0.976072	0.402203	1.09321	0.872176	1.00564	0.309696	0.945933
POSITIVE ION LIPIDS	8469	M756T460	755.606	459.935	3.75455e+06	SM(d38:3)+H	SM(d38:3)+H	SM	C43 H84 O6 N2 P1	755.606	C	755.606	-0.65	459.935	755.606	-0.16	460.68	0.415906	1.15436	0.924545	0.980997	0.0323357	0.799168	0.183602	0.883355	0.264974	0.879423	0.184922	0.949565	0.313417	0.919186	0.97878	1.00194	0.275973	1.07314	0.532401	1.04931	0.140617	1.2163	0.895846	1.00773	0.604341	0.946893
POSITIVE ION LIPIDS	8717	M774T514	773.653	514.225	9.66804e+07	SM(d39:1)+H	SM(d39:1)+H	SM	C44 H90 O6 N2 P1	773.653	C	773.653	-0.52	514.225	773.653	-0.03	513.96	0.824352	1.02177	0.546623	1.09726	0.0302164	1.86746	0.00066406	1.77459	0.0639503	0.829985	0.106254	0.815567	0.0392077	0.925956	0.616735	0.969825	0.86141	1.00834	0.117174	0.928768	0.472804	1.15039	0.274236	1.06746	0.556073	0.943815
POSITIVE ION LIPIDS	8688	M772T494	771.637	494.115	1.29003e+07	SM(d39:2)+H	SM(d39:2)+H	SM	C44 H88 O6 N2 P1	771.637	C	771.637	-0.57	494.115	771.637	-0.32	493.71	0.752062	0.940628	0.81621	0.950419	0.000219128	0.782295	0.00841543	1.11825	0.100448	0.938679	0.00191258	0.922991	0.189209	0.946936	0.324653	0.956168	0.945123	0.99702	0.0464262	0.924677	0.600495	1.09804	0.530496	1.0397	0.816836	0.979673
POSITIVE ION LIPIDS	8925	M788T523	787.668	523.01	5.43723e+08	SM(d40:1)+H	SM(d40:1)+H	SM	C45 H92 O6 N2 P1	787.669	C	787.668	-0.85	523.01	787.669	-0.12	522.51	0.0799117	1.17169	0.127986	1.2891	0.0194796	2.65688	0.000309815	2.07148	0.392768	0.841446	0.266873	0.788594	0.00117878	0.933301	0.59387	0.979467	0.977347	0.998922	0.126876	0.931605	0.312362	1.14311	0.283366	1.06695	0.719926	0.972724
POSITIVE ION LIPIDS	8904	M786T505	785.652	504.623	4.2222e+08	SM(d40:2)+H	SM(d40:2)+H	SM	C45 H90 O6 N2 P1	785.653	C	785.652	-0.86	504.623	785.653	-0.09	504.27	0.928015	0.983986	0.75583	0.941074	0.0267789	0.891016	0.00449904	1.19907	0.0560328	0.934129	0.140225	0.947589	0.0233715	0.948225	0.629469	0.979827	0.753835	0.987049	0.152065	0.942534	0.436025	1.11884	0.385293	1.04868	0.577613	0.954239
POSITIVE ION LIPIDS	9151	M802T532	801.684	532.333	272843888	SM(d41:1)+H	SM(d41:1)+H	SM	C46 H94 O6 N2 P1	801.684	C	801.684	-0.65	532.333	801.684	-0.07	531.75	0.0146176	1.31353	0.0947374	1.40955	0.012027	3.47175	0.000232971	2.39482	0.698298	0.956854	0.114343	0.724383	0.0534945	0.945707	0.493204	0.972718	0.82128	0.990133	0.0577194	0.910487	0.397878	1.15038	0.199914	1.09069	0.638901	0.951098
POSITIVE ION LIPIDS	9110	M800T515	799.668	514.984	2.33015e+08	SM(d41:2)+H	SM(d41:2)+H	SM	C46 H92 O6 N2 P1	799.669	C	799.668	-0.98	514.984	799.669	-0.03	514.68	0.987446	0.997142	0.824106	0.953531	0.790901	0.982536	0.00288453	1.27656	0.0866355	0.926161	0.167043	0.942672	0.0596204	0.935368	0.63647	0.970017	0.948442	0.996672	0.153277	0.926371	0.479737	1.15683	0.264771	1.06899	0.547777	0.939547
POSITIVE ION LIPIDS	9384	M816T541	815.699	540.692	589731982	SM(d42:1)+H	SM(d42:1)+H	SM	C47 H96 O6 N2 P1	815.7	C	815.699	-0.76	540.692	815.7	-0.08	540.27	0.0273633	1.39239	0.17225	1.42568	0.0161185	2.77576	9.31099e-05	2.12562	0.588611	1.07322	0.139433	0.721989	0.43814	1.01535	0.000197388	0.701854	0.459683	1.11384	0.787793	1.03494	0.781224	1.06305	0.131635	1.29253	0.375889	1.16813
POSITIVE ION LIPIDS	9356	M814T523	813.683	523.239	1124745902	SM(d42:2)+H	SM(d42:2)+H	SM	C47 H94 O6 N2 P1	813.684	C	813.683	-1.26	523.239	813.684	-0.04	522.57	0.769552	0.936449	0.721112	0.923141	0.287039	0.916903	0.0193701	1.28898	0.0354411	0.895961	0.0988851	0.910496	0.0759453	0.959137	0.743227	0.984056	0.969235	0.998426	0.120093	0.928979	0.349675	1.14661	0.259486	1.07514	0.682003	0.966944
POSITIVE ION LIPIDS	9331	M812T505	811.667	505.015	5.09293e+08	SM(d42:3)+H	SM(d42:3)+H	SM	C47 H92 O6 N2 P1	811.669	C	811.667	-1.61	505.015	811.669	-0.13	504.36	0.839344	1.03746	0.827299	0.95779	0.00129063	0.825042	0.029291	1.0858	0.0478459	0.944059	0.132604	0.958299	0.0323288	0.953643	0.743751	0.983338	0.780152	0.988094	0.151314	0.942089	0.44173	1.12116	0.377782	1.05124	0.553495	0.947775
POSITIVE ION LIPIDS	9636	M830T547	829.715	547.03	2.09182e+07	SM(d43:1)+H	SM(d43:1)+H	SM	C48 H98 O6 N2 P1	829.716	C	829.715	-0.28	547.03	829.716	-0.13	545.67	0.010491	1.52048	0.179667	1.48673	NA	NA	NA	NA	0.252184	0.852644	0.123313	0.678017	0.0112161	0.962539	0.497142	0.969132	0.779402	0.985789	0.102996	0.909778	0.338525	1.19014	0.436272	1.06295	0.667301	0.955863
POSITIVE ION LIPIDS	9606	M828T530	827.699	529.98	3.88346e+07	SM(d43:2)+H	SM(d43:2)+H	SM	C48 H96 O6 N2 P1	827.7	C	827.699	-0.92	529.98	827.7	-0.14	528.54	0.648327	1.07076	0.782537	1.0584	0.0108985	1.42594	0.0012337	1.63242	0.0557465	0.872984	0.0995331	0.87357	0.153105	0.946471	0.845947	0.987722	0.821376	0.988669	0.0752589	0.902247	0.44223	1.14447	0.188943	1.09522	0.590967	0.945366
POSITIVE ION LIPIDS	9567	M826T514	825.684	513.986	6.39954e+06	SM(d43:3)+H	SM(d43:3)+H	SM	C48 H94 O6 N2 P1	825.684	C	825.684	-0.57	513.986	825.684	-0.13	514.11	0.633313	0.907249	0.750095	1.08023	0.0146339	0.710849	0.079143	1.20901	0.147552	0.943362	0.180024	0.951717	0.192374	0.949252	0.712587	0.974921	0.449879	1.03907	0.634027	0.978047	0.51306	1.14871	0.321363	1.06777	0.431158	0.924154
POSITIVE ION LIPIDS	9860	M842T540	841.715	540.415	7.82701e+06	SM(d44:2)+H	SM(d44:2)+H	SM	C49 H98 O6 N2 P1	841.716	C	841.715	-0.67	540.415	841.716	-0.14	539.46	NA	0.918504	NA	1.09118	NA	1.71469	NA	2.04609	0.0597594	0.697347	0.136115	0.800045	0.651832	0.947941	0.299531	0.881433	0.941815	1.00375	0.845165	1.01407	0.191574	1.36009	0.314567	1.06612	0.797334	1.01953
POSITIVE ION LIPIDS	8011	M720T446	719.569	445.62	7.24472e+06	SM(t34:1)+H	SM(t34:1)+H	SM	C39 H80 O7 N2 P1	719.57	C	719.569	-1.2	445.62	719.57	0.07	445.41	0.403506	0.753816	0.618796	1.12285	0.735104	1.09379	0.49952	1.16219	0.747753	0.969118	0.141764	0.896184	0.369672	0.914601	0.579049	0.939832	0.480048	1.09219	0.821533	1.01519	0.409183	1.14934	0.573918	1.03856	0.919983	1.00967
POSITIVE ION LIPIDS	8013	M720T430	719.569	429.582	1.84567e+06	SM(t34:1)+H	SM(t34:1)+H	SM	C39 H80 O7 N2 P1	719.57	C	719.569	-1.52	429.582	719.57	-0.12	429.6	NA	NA	NA	NA	NA	0.653048	0.891448	0.995865	0.00729923	0.861162	NA	0.899737	0.210136	0.91323	NA	1.17189	0.205226	0.891453	0.327041	0.929132	NA	0.773323	0.0130627	1.13602	0.685187	0.966634
POSITIVE ION LIPIDS	7978	M718T416	717.554	416.23	1.82139e+06	SM(t34:2)+H	SM(t34:2)+H	SM	C39 H78 O7 N2 P1	717.554	C	717.554	-0.76	416.23	717.554	-0.02	415.95	0.726632	0.931114	0.563251	0.879553	0.00483606	0.847934	0.741054	1.00866	0.844651	1.00664	0.444407	1.02853	0.349864	0.966279	0.842565	0.987611	0.737366	0.981547	0.118124	0.910807	0.469009	1.15372	0.616749	1.02676	0.99082	1.00107
POSITIVE ION LIPIDS	9675	M832T513	831.694	512.869	7.53104e+06	SM(t42:1)+H	SM(t42:1)+H	SM	C47 H96 O7 N2 P1	831.695	C	831.694	-1.5	512.869	831.695	-0.1	512.58	0.258583	1.06494	0.128161	1.22002	0.034874	2.72436	0.000613582	2.11254	0.0923647	0.817364	0.100708	0.765958	0.0565927	0.922786	0.707809	0.972858	0.929663	1.00361	0.0695352	0.926139	0.434805	1.16579	0.227864	1.06533	0.476591	0.931185
POSITIVE ION LIPIDS	6161	M585T496	584.524	495.509	9.25671e+06	TG(32:1e)+NH4	TG(32:1e)+NH4	TG	C35 H70 O5 N1	584.525	C	584.524	-0.81	495.509	584.525	-0.09	495.42	0.319309	1.27732	0.992304	0.997755	0.20872	0.839685	0.23271	0.977694	0.369393	0.988838	0.877549	0.998247	0.721391	0.992106	0.626646	0.977765	0.496871	0.973985	0.118061	0.930275	0.506319	1.10582	0.466941	1.04264	0.23032	0.890379
POSITIVE ION LIPIDS	6541	M611T499	610.54	498.567	7.97928e+07	TG(34:2e)+NH4	TG(34:2e)+NH4	TG	C37 H72 O5 N1	610.541	C	610.54	-0.8	498.567	610.54	-0.1	498.39	0.304457	1.29862	0.924652	1.02316	0.122234	0.811579	0.500411	0.990147	0.177866	0.980677	0.0671702	0.969554	0.104174	0.94717	0.503178	0.968054	0.530576	0.977226	0.0581228	0.906728	0.553387	1.11165	0.488367	1.04416	0.215614	0.878597
POSITIVE ION LIPIDS	6970	M641T533	640.587	532.574	7.87104e+06	TG(36:1e)+NH4	TG(36:1e)+NH4	TG	C39 H78 O5 N1	640.587	C	640.587	-0.65	532.574	640.587	-0.09	532.53	0.66075	1.16591	0.644216	0.838078	0.0911782	0.64956	0.284907	1.02369	0.0880841	0.924534	0.10686	0.886411	0.275788	0.977399	0.604584	0.974862	0.739179	0.985477	0.0348426	0.907115	0.413427	1.15312	0.213365	1.10816	0.375892	0.896587
POSITIVE ION LIPIDS	7889	M711T554_1	710.629	553.901	1.1512e+06	TG(40:1)+NH4	TG(40:1)+NH4	TG	C43 H84 O6 N1	710.629	C	710.629	-1.12	553.901	710.629	0.07	553.59	0.813477	1.08753	0.715511	0.829295	0.00237265	0.77247	0.0628407	1.16746	0.124728	0.736336	0.184963	0.69102	0.128438	1.14858	0.235751	0.890903	0.68315	0.983643	0.123373	0.942871	0.16251	1.2426	0.0856281	1.32142	0.207809	1.21586
POSITIVE ION LIPIDS	8243	M737T558	736.645	557.842	1.58296e+06	TG(6:0_18:1_18:1)+NH4	TG(42:2)+NH4	TG	C45 H86 O6 N1	736.645	B	736.645	-0.44	557.842	736.645	-0.02	559.44	NA	1.96011	NA	1.25794	0.112783	0.619153	0.0553942	1.14485	0.0207676	0.525689	NA	NA	0.686845	1.11702	0.74939	1.0733	0.62623	1.01801	0.373357	0.969191	0.151143	1.4093	0.185877	1.34885	0.109203	1.77459
POSITIVE ION LIPIDS	8587	M765T568	764.676	567.957	3.51667e+06	TG(16:0_10:0_18:2)+NH4	TG(44:2)+NH4	TG	C47 H90 O6 N1	764.676	A	764.676	-0.92	567.957	764.676	-0.02	567.6	0.752563	1.11721	0.413294	0.674116	0.0496009	0.80508	0.11638	1.16972	0.188022	0.770758	0.240182	0.71678	0.0859042	1.14736	0.290586	0.859912	0.298167	1.0209	0.420463	0.974147	0.159796	1.1769	0.115117	1.36546	0.169506	1.31673
POSITIVE ION LIPIDS	9019	M795T590	794.722	590.3	5.08895e+07	TG(18:1_14:0_14:0)+NH4	TG(46:1)+NH4	TG	C49 H96 O6 N1	794.723	A	794.722	-1.25	590.3	794.723	-0.11	590.22	0.551037	1.12785	0.41415	0.779866	0.268297	0.644031	0.0165247	1.31918	0.296155	0.777761	0.245823	0.680193	0.0805911	1.15966	0.29236	0.857777	0.251494	0.907799	0.0847255	0.890072	0.261236	1.12898	0.422783	1.15423	0.0671869	1.38044
POSITIVE ION LIPIDS	8992	M793T580	792.707	580.007	23701478	TG(16:1_12:0_18:1)+NH4	TG(46:2)+NH4	TG	C49 H94 O6 N1	792.708	A	792.707	-1.17	580.007	792.708	-0.06	579.87	0.696884	1.11177	0.407954	0.717525	0.0212307	0.844081	0.0199586	1.23804	0.22606	0.784416	0.341161	0.740425	0.0930153	1.21808	0.308119	0.833226	0.625354	1.01327	0.683089	1.01241	0.21083	1.1261	0.146714	1.41486	0.129291	1.44741
POSITIVE ION LIPIDS	8959	M791T569	790.691	569.445	5.63316e+06	TG(16:1_12:0_18:2)+NH4	TG(46:3)+NH4	TG	C49 H92 O6 N1	790.692	A	790.691	-0.86	569.445	790.692	-0.08	568.47	0.785801	1.10852	0.473972	0.703687	0.0160356	0.828954	0.097468	1.14943	0.165551	0.782821	0.250773	0.742117	0.096141	1.16069	0.34564	0.864065	0.0593303	1.04133	0.726673	1.01227	0.128395	1.16718	0.186159	1.32247	0.130007	1.38304
POSITIVE ION LIPIDS	9244	M807T586	806.722	585.797	3.45479e+06	TG(15:0_14:0_18:2)+NH4	TG(47:2)+NH4	TG	C50 H96 O6 N1	806.723	A	806.722	-1.49	585.797	806.723	-0.16	585.39	0.780389	0.966077	0.18579	0.719136	0.234628	0.647275	0.0623557	1.18195	0.299541	0.644219	0.247834	0.567727	0.091535	1.22123	0.334215	0.838216	0.558514	1.02112	0.399826	1.03182	0.208627	1.17558	0.191853	1.36683	0.131231	1.43846
POSITIVE ION LIPIDS	9607	M828T600	827.709	600.334	1.58247e+07	TG(16:0_16:0_16:1)+Na	TG(48:1)+Na	TG	C51 H96 O6 Na1	827.71	A	827.709	-1.4	600.334	827.71	-0.1	600.139	0.19645	1.11051	0.727742	0.963557	0.443998	0.753424	0.0116945	1.30765	0.420737	0.925888	0.945066	0.989518	0.223697	1.05224	0.250433	1.12086	0.072857	0.904531	0.345004	0.936633	0.569644	1.07691	0.885117	0.985468	0.706314	0.979274
POSITIVE ION LIPIDS	9472	M821T591	820.738	590.973	1.67103e+08	TG(16:0_14:0_18:2)+NH4	TG(48:2)+NH4	TG	C51 H98 O6 N1	820.739	A	820.738	-1.17	590.973	820.739	-0.13	590.91	0.495434	1.14765	0.426074	0.772001	0.271723	0.626989	0.0315178	1.32929	0.41044	0.855677	0.355514	0.759695	0.0434675	1.23294	0.360717	0.888157	0.506121	0.978236	0.130559	1.05966	0.529921	1.07372	0.234708	1.22856	0.132349	1.26308
POSITIVE ION LIPIDS	9439	M819T581	818.722	580.82	5.51065e+07	TG(16:0_14:0_18:3)+NH4	TG(48:3)+NH4	TG	C51 H96 O6 N1	818.723	A	818.722	-1.08	580.82	818.723	-0.19	580.5	0.635772	1.15136	0.396667	0.704524	0.200332	0.572121	0.03288	1.23096	0.219909	0.796545	0.296156	0.725873	0.0991533	1.20967	0.293441	0.825656	0.648346	1.01496	0.523279	1.02253	0.206317	1.12144	0.254718	1.32692	0.127952	1.44608
POSITIVE ION LIPIDS	9400	M817T570	816.707	570.492	1.38991e+07	TG(48:4)+NH4	TG(48:4)+NH4	TG	C51 H94 O6 N1	816.708	C	816.707	-1.14	570.492	816.707	-0.1	573.69	0.723115	0.890765	0.459519	0.665038	0.00447111	0.828898	0.0339691	1.14289	0.263141	0.836775	0.271707	0.748395	0.0637759	1.17941	0.369774	0.877009	0.0793468	1.04894	0.360818	1.03552	0.140939	1.15294	0.220293	1.26351	0.139619	1.35615
POSITIVE ION LIPIDS	9735	M835T596	834.754	596.268	1.99872e+07	TG(16:0_16:1_17:1)+NH4	TG(49:2)+NH4	TG	C52 H100 O6 N1	834.755	A	834.754	-1.2	596.268	834.754	-0.1	596.25	0.486907	1.08479	0.457884	0.836765	0.287101	0.683371	0.0135708	1.32753	0.343452	0.7561	0.296764	0.671573	0.0480859	1.27413	0.354845	0.861777	0.891601	1.0086	0.532839	1.03806	0.162045	1.20274	0.228457	1.24461	0.128702	1.36771
POSITIVE ION LIPIDS	9697	M833T587	832.738	586.663	7.62861e+06	TG(14:0_17:1_18:2)+NH4	TG(49:3)+NH4	TG	C52 H98 O6 N1	832.739	A	832.738	-1.26	586.663	832.739	-0.02	585.99	0.59858	1.14107	0.399181	0.716578	0.599837	0.955291	0.0577667	1.26893	0.251802	0.762412	0.352846	0.717172	0.092194	1.25647	0.237058	0.820795	0.688876	1.01634	0.400545	1.038	0.176011	1.12471	0.349295	1.26104	0.0992271	1.4676
POSITIVE ION LIPIDS	10062	M856T610	855.74	610.111	3.63018e+07	TG(16:0_16:0_18:1)+Na	TG(50:1)+Na	TG	C53 H100 O6 Na1	855.741	A	855.74	-1.42	610.111	855.741	-0.14	609.78	0.766426	1.03752	0.73105	0.961294	0.526785	0.790063	0.00393761	1.81459	0.501802	0.917463	0.297824	0.810941	0.213227	0.897675	0.202469	0.877439	0.234347	0.880849	0.972304	1.00355	0.84145	1.04313	0.68771	1.04646	0.00314022	1.21385
POSITIVE ION LIPIDS	9967	M849T601	848.769	601.178	4.85577e+08	TG(16:0_16:1_18:1)+NH4	TG(50:2)+NH4	TG	C53 H102 O6 N1	848.77	A	848.769	-1.07	601.178	848.77	-0.12	601.05	0.368148	1.13748	0.496168	0.859787	0.372134	0.652284	0.118726	1.44408	0.877364	1.03733	0.496868	0.816917	0.0852758	1.20322	0.353059	0.893732	0.98735	0.998367	0.6933	0.96716	0.530746	1.0685	0.665537	1.06984	0.0737809	1.28091
POSITIVE ION LIPIDS	9938	M847T592	846.753	591.678	3.80178e+08	TG(18:1_14:0_18:2)+NH4	TG(50:3)+NH4	TG	C53 H100 O6 N1	846.755	A	846.753	-1.24	591.678	846.754	-0.21	591.39	0.622329	1.11199	0.38939	0.741011	0.259431	0.606319	0.0174624	1.36286	0.454497	0.865468	0.400989	0.76236	0.0475775	1.18012	0.283431	0.862575	0.528875	1.02533	0.143841	1.05481	0.327764	1.06533	0.291122	1.18886	0.140783	1.27089
POSITIVE ION LIPIDS	9912	M845T582	844.738	581.946	1.17681e+08	TG(16:1_16:1_18:2)+NH4	TG(50:4)+NH4	TG	C53 H98 O6 N1	844.739	A	844.738	-1.05	581.946	844.739	-0.14	581.52	0.72092	1.10816	0.399662	0.695373	0.214263	0.57669	0.0269728	1.25588	0.292784	0.829711	0.3235	0.739484	0.0875412	1.23973	0.32065	0.829756	0.427966	1.03029	0.259757	1.04719	0.164195	1.11885	0.347571	1.26912	0.122963	1.44755
POSITIVE ION LIPIDS	9874	M843T573	842.722	573.237	2.06619e+07	TG(18:2_14:1_18:2)+NH4	TG(50:5)+NH4	TG	C53 H96 O6 N1	842.723	A	842.722	-0.86	573.237	842.723	-0.15	571.5	0.860096	1.06372	0.383655	0.653716	0.0366491	0.84101	0.0575911	1.17102	0.190325	0.795849	0.284309	0.742789	0.0997658	1.20745	0.301238	0.840422	0.0947184	1.07378	0.167412	1.07023	0.135779	1.14321	0.305733	1.29285	0.12137	1.47876
POSITIVE ION LIPIDS	9844	M841T565	840.707	565.301	3.65359e+06	TG(18:2_14:2_18:2)+NH4	TG(50:6)+NH4	TG	C53 H94 O6 N1	840.708	A	840.707	-0.31	565.301	840.708	-0.06	564.9	0.784069	1.14201	0.408979	0.560762	0.0570973	0.783158	0.164351	1.09843	0.108285	0.770434	0.258661	0.727885	0.0775941	1.17179	0.295085	0.847239	0.106624	1.0615	0.332394	1.04493	0.119963	1.15868	0.345229	1.25293	0.15784	1.40141
POSITIVE ION LIPIDS	10179	M863T606	862.785	605.931	3.65086e+07	TG(16:1_17:0_18:1)+NH4	TG(51:2)+NH4	TG	C54 H104 O6 N1	862.786	A	862.785	-0.83	605.931	862.786	-0.09	606	0.143174	1.12162	0.771532	0.953818	0.425221	0.701973	0.0334437	1.40293	0.439838	0.868119	0.854008	0.934903	0.216087	1.26655	0.608493	0.847444	0.68735	1.03432	0.191693	1.112	0.184354	1.17489	0.240948	1.32212	0.132926	1.38752
POSITIVE ION LIPIDS	10111	M859T588	858.754	587.57	1.70005e+07	TG(15:0_18:2_18:2)+NH4	TG(51:4)+NH4	TG	C54 H100 O6 N1	858.755	A	858.754	-1.17	587.57	858.754	-0.07	587.355	0.818639	1.06628	0.4036	0.70273	0.22259	0.912908	0.0490326	1.28484	0.360385	0.842884	0.397155	0.758372	0.102845	1.2545	0.240623	0.801386	0.596756	1.02964	0.217697	1.07408	0.106125	1.09968	0.391984	1.23265	0.0918096	1.44348
POSITIVE ION LIPIDS	10465	M882T611	881.755	610.749	1.07925e+08	TG(16:0_18:1_18:1)+Na	TG(52:2)+Na	TG	C55 H102 O6 Na1	881.757	A	881.755	-1.8	610.749	881.757	-0.15	610.56	0.0768755	1.20775	0.87433	0.974245	0.224702	0.601186	0.137591	1.15788	0.500864	0.913536	0.581066	0.868518	0.519298	0.971054	0.602669	0.946711	0.189762	1.11934	0.612568	1.05751	0.491927	1.06527	0.544512	1.0205	0.585657	1.04262
POSITIVE ION LIPIDS	10434	M880T602	879.739	602.011	1.2173e+08	TG(16:0_18:1_18:2)+Na	TG(52:3)+Na	TG	C55 H100 O6 Na1	879.741	A	879.739	-2.06	602.011	879.741	-0.22	601.98	0.35824	0.922841	0.412198	0.867539	0.449865	0.702395	0.013863	1.44832	0.337353	0.938363	0.0680226	0.750062	0.780762	1.03322	0.703234	0.963743	0.146262	1.10141	0.659802	0.972038	0.375392	0.900154	0.0358048	1.21853	0.341129	0.906058
POSITIVE ION LIPIDS	10341	M873T593	872.769	592.654	9.53763e+08	TG(16:0_18:2_18:2)+NH4	TG(52:4)+NH4	TG	C55 H102 O6 N1	872.77	A	872.769	-1.31	592.654	872.77	-0.03	592.38	0.602504	1.11531	0.389523	0.745879	0.281527	0.61678	0.0216206	1.34645	0.526618	0.885538	0.460339	0.781713	0.0423737	1.19977	0.276214	0.854183	0.194236	1.06862	0.113998	1.08823	0.318755	1.05427	0.195546	1.23169	0.117015	1.31237
POSITIVE ION LIPIDS	10279	M869T576	868.738	576.256	3.66402e+07	TG(16:0_18:3_18:3)+NH4	TG(52:6)+NH4	TG	C55 H98 O6 N1	868.739	A	868.738	-0.82	576.256	868.739	-0.02	577.02	0.863053	1.062	0.398916	0.664069	0.0271336	0.836818	0.0543409	1.18677	0.292915	0.822962	0.362914	0.761718	0.0933563	1.2315	0.341943	0.839709	0.231718	1.0754	0.149052	1.09495	0.14291	1.13758	0.314541	1.30436	0.125276	1.47983
POSITIVE ION LIPIDS	10679	M896T615	895.772	615.167	1.10953e+07	TG(17:0_18:1_18:1)+Na	TG(53:2)+Na	TG	C56 H104 O6 Na1	895.773	A	895.772	-0.87	615.167	895.772	-0.1	615.403	0.774157	0.955418	0.680248	0.946657	0.874949	1.033	0.0889204	1.37349	0.779154	0.940156	0.40462	0.772733	0.0520615	1.22405	0.243278	0.861231	0.728853	1.02825	0.175629	1.11871	0.274334	1.10129	0.435312	1.127	0.148353	1.25728
POSITIVE ION LIPIDS	10573	M889T606	888.8	606.304	3.3037e+07	TG(17:0_18:1_18:2)+NH4	TG(53:3)+NH4	TG	C56 H106 O6 N1	888.801	A	888.8	-1.18	606.304	888.801	-0.09	606.214	0.319815	1.11252	0.505201	0.880256	0.957959	1.01462	0.0522949	1.57965	0.62569	0.901064	0.387787	0.776723	0.0282324	1.39043	0.120798	0.785253	0.205948	1.1361	0.152586	1.15234	0.216457	1.13682	0.160442	1.37982	0.154835	1.5017
POSITIVE ION LIPIDS	10616	M892T597	891.74	597.284	4.64768e+06	TG(17:0_18:2_18:2)+Na	TG(53:4)+Na	TG	C56 H100 O6 Na1	891.741	A	891.74	-1.54	597.284	891.741	-0.2	597.06	0.351821	1.1412	0.52903	0.861174	0.790781	0.964171	0.0270947	1.32201	0.730473	0.97765	0.471984	0.880949	0.00206988	1.12663	0.469016	0.944573	0.276599	1.06298	0.644322	1.02518	0.265587	1.06505	0.478901	1.07724	0.0869529	1.35584
POSITIVE ION LIPIDS	10505	M885T588	884.769	588.363	1.28149e+07	TG(16:0_17:1_20:4)+NH4	TG(53:5)+NH4	TG	C56 H102 O6 N1	884.77	A	884.769	-1.32	588.363	884.77	-0.11	593.67	0.655243	1.19149	NA	0.369125	NA	0.705021	NA	1.2592	0.225148	0.818988	0.356585	0.747533	0.0540301	1.26026	0.288789	0.834195	0.336586	1.06265	0.141931	1.11046	0.202014	1.0747	0.469639	1.18715	0.0858252	1.41466
POSITIVE ION LIPIDS	10481	M883T583	882.753	583.452	4.99826e+06	TG(15:0_18:1_20:5)+NH4	TG(53:6)+NH4	TG	C56 H100 O6 N1	882.755	A	882.753	-1.96	583.452	882.754	-0.05	583.62	NA	NA	NA	NA	NA	NA	NA	NA	0.547274	1.26865	0.836168	1.14642	NA	1.0399	NA	0.715162	0.507591	1.03643	0.360249	1.0469	0.0751649	1.14692	0.72876	1.12504	0.0949457	1.6926
POSITIVE ION LIPIDS	10876	M910T620	909.787	619.96	3.52659e+07	TG(18:0_18:1_18:1)+Na	TG(54:2)+Na	TG	C57 H106 O6 Na1	909.788	A	909.787	-1.38	619.96	909.788	-0.12	619.981	0.522781	1.1279	0.183586	1.20102	NA	0.213847	0.253853	1.24933	0.201494	0.693713	0.269431	0.698805	0.0599615	1.21235	0.20979	0.813317	0.00163532	1.1657	0.0071733	1.11401	0.504537	1.0768	0.401337	1.16775	0.546978	1.06529
POSITIVE ION LIPIDS	10848	M908T612	907.771	611.612	4.0513e+07	TG(18:1_18:1_18:1)+Na	TG(54:3)+Na	TG	C57 H104 O6 Na1	907.773	A	907.771	-1.92	611.612	907.772	-0.24	611.947	0.161478	1.21299	0.307164	0.855417	0.222172	0.616598	0.639139	1.09625	0.633335	0.915141	0.367853	0.823847	0.0965985	0.919334	0.0250639	0.855906	0.290147	1.04564	0.214095	1.134	0.83608	0.980454	0.536673	0.931048	0.45276	0.913401
POSITIVE ION LIPIDS	10796	M904T594	903.739	593.878	8.40302e+07	TG(18:1_18:2_18:2)+Na	TG(54:5)+Na	TG	C57 H100 O6 Na1	903.741	B	903.739	-2.08	593.878	903.741	-0.18	599.07	0.419301	1.12804	0.413126	0.824695	0.307524	0.637224	0.00606196	1.25887	0.619229	0.957611	0.444242	0.88242	0.0298016	1.08255	0.142591	0.845724	0.696933	1.01651	0.671359	1.01779	0.224234	1.17605	0.609802	0.91035	0.136018	1.15354
POSITIVE ION LIPIDS	10695	M897T589	896.769	589.126	2.34631e+08	TG(16:0_18:2_20:4)+NH4	TG(54:6)+NH4	TG	C57 H102 O6 N1	896.77	B	896.769	-1.31	589.126	896.77	-0.17	589.14	NA	NA	NA	NA	NA	NA	NA	NA	NA	NA	NA	NA	NA	1.28434	NA	NA	0.778575	1.02301	0.337115	1.08498	0.482101	1.07215	0.486082	1.18446	0.0531539	1.49992
POSITIVE ION LIPIDS	10632	M893T570	892.739	570.211	8.65397e+06	TG(18:3_18:2_18:3)+NH4	TG(54:8)+NH4	TG	C57 H98 O6 N1	892.739	A	892.739	0.18	570.211	892.739	-0.17	572.37	NA	0.948948	NA	0.197919	0.0374902	0.812596	0.0421655	1.14345	0.188964	0.794335	0.263032	0.723782	0.109092	1.19358	0.247549	0.824193	0.16277	1.09706	0.156968	1.10852	0.139395	1.13765	0.442289	1.22393	0.0999887	1.50832
POSITIVE ION LIPIDS	11110	M927T607	926.816	607.492	7.91181e+07	TG(16:0_18:1_22:4)+NH4	TG(56:5)+NH4	TG	C59 H108 O6 N1	926.817	A	926.816	-1.3	607.492	926.817	-0.15	608.46	NA	1.13478	0.26111	0.783112	NA	NA	NA	1.3997	0.921812	0.977854	0.590172	0.825828	0.0276313	1.43379	0.285588	0.798374	0.346358	1.1571	0.146049	1.23748	0.365923	1.11631	0.312111	1.27294	0.0761596	1.53865
POSITIVE ION LIPIDS	11081	M925T598	924.8	598.353	1.48296e+08	TG(18:1_18:1_20:4)+NH4	TG(56:6)+NH4	TG	C59 H106 O6 N1	924.801	A	924.8	-1.54	598.353	924.801	-0.14	599.22	0.748818	1.05472	0.321972	0.751619	0.970123	0.994258	0.016084	1.39587	0.26184	0.803009	0.576568	0.801613	0.0729705	1.32944	0.180455	0.803815	0.251787	1.15349	0.172901	1.18282	0.56014	1.05591	0.410692	1.18006	0.0723231	1.48139
POSITIVE ION LIPIDS	11047	M923T589	922.784	589.445	1.41241e+08	TG(16:0_18:2_22:5)+NH4	TG(56:7)+NH4	TG	C59 H104 O6 N1	922.786	A	922.784	-1.84	589.445	922.786	-0.08	589.56	0.79622	1.07888	0.384488	0.694199	0.207508	0.888069	0.0414878	1.26834	0.402402	0.8509	0.386618	0.755306	0.0677699	1.2624	0.261441	0.809474	0.410455	1.08559	0.134384	1.16323	0.436407	1.0686	0.531947	1.17062	0.0684631	1.48009
POSITIVE ION LIPIDS	11017	M921T582	920.769	582.004	6.25253e+07	TG(18:2_18:2_20:4)+NH4	TG(56:8)+NH4	TG	C59 H102 O6 N1	920.77	A	920.769	-1.34	582.004	920.77	-0.14	579.87	0.809251	1.08164	0.381283	0.66785	0.208042	0.879501	0.0593721	1.21716	0.352562	0.837435	0.378398	0.749542	0.0768365	1.28374	0.28282	0.803753	0.359924	1.08898	0.137116	1.15424	0.202385	1.12201	0.503502	1.22037	0.0858748	1.55606
POSITIVE ION LIPIDS	10991	M919T571	918.754	571.418	1.03555e+07	TG(20:5_18:2_18:2)+NH4	TG(56:9)+NH4	TG	C59 H100 O6 N1	918.755	A	918.754	-0.1	571.418	918.754	-0.19	570.03	0.942806	1.02804	0.347092	0.611187	0.0119709	0.826086	0.0959461	1.15608	0.211798	0.787745	0.268832	0.727139	0.0979177	1.23097	0.297292	0.821889	0.224344	1.10575	0.095182	1.16426	0.150999	1.14223	0.486098	1.22371	0.104499	1.52059
POSITIVE ION LIPIDS	11303	M945T576	944.769	575.761	9.74903e+06	TG(18:2_18:2_22:6)+NH4	TG(58:10)+NH4	TG	C61 H102 O6 N1	944.77	A	944.769	-0.81	575.761	944.77	-0.12	575.7	0.791572	1.10734	0.428546	0.647	0.045521	0.846815	0.0730439	1.1566	0.295685	0.821756	0.338443	0.740768	0.0976928	1.26452	0.295563	0.80879	0.382529	1.11179	0.141955	1.18581	0.194003	1.15348	0.539554	1.21279	0.0983089	1.5708
POSITIVE ION LIPIDS	7342	M670T588	669.557	587.63	1.36273e+06	ZyE(20:5)+H	ZyE(20:5)+H	ZyE	C47 H73 O2	669.561	C	669.557	-4.91	587.63	669.56	-0.35	587.49	0.816587	1.01435	0.369452	0.858889	0.0129986	0.965513	0.0298433	1.18433	0.174739	0.851351	0.0687112	0.726389	0.323943	0.96349	0.683142	1.02475	0.000260887	0.650302	0.785181	0.974059	0.249061	1.07872	0.251032	0.886849	0.328744	0.75248
NEGATIVE ION LIPIDS	2265	M611T505	610.543	504.58	1.65143e+06	Cer(d36:1)+HCOO	Cer(d36:1)+HCOO	Cer	C37 H72 O5 N1	610.542	C	610.543	1.65	504.58	610.542	0.13	503.91	NA	NA	NA	NA	0.531773	0.962386	0.00125704	1.48151	0.822085	0.983738	0.293225	0.900191	0.00468703	0.88961	0.169308	1.04983	0.750541	1.01359	0.0644053	0.879312	0.52449	1.17895	0.445534	1.07056	0.354941	0.896889
NEGATIVE ION LIPIDS	2367	M639T524	638.574	523.882	2.61172e+06	Cer(d38:1)+HCOO	Cer(d38:1)+HCOO	Cer	C39 H76 O5 N1	638.573	C	638.574	1.7	523.882	638.573	0.01	523.47	NA	NA	NA	NA	0.420378	1.09911	0.0170469	1.56072	0.918022	1.00938	0.419492	0.887279	0.00649706	0.883519	0.246356	1.04989	0.896428	1.00904	0.0757235	0.860228	0.491344	1.22655	0.4504	1.09602	0.451243	0.90295
NEGATIVE ION LIPIDS	2470	M667T541	666.606	540.502	9.44373e+06	Cer(d40:1)+HCOO	Cer(d40:1)+HCOO	Cer	C41 H80 O5 N1	666.604	C	666.606	2.37	540.502	666.604	0.1	539.97	0.262281	1.77543	NA	1.56377	0.104291	1.57113	0.00133968	2.12854	0.221344	1.26106	0.921146	1.01683	0.837403	1.01176	0.566747	0.962267	0.861918	0.99214	0.0378941	0.885702	0.416877	1.21227	0.267867	1.09482	0.36529	0.896955
NEGATIVE ION LIPIDS	2461	M665T525	664.59	524.678	3.61716e+06	Cer(d40:2)+HCOO	Cer(d40:2)+HCOO	Cer	C41 H78 O5 N1	664.589	C	664.59	2.17	524.678	664.589	0.15	521.91	0.841154	0.921473	0.558727	0.646411	0.0342254	0.817343	0.0070343	1.27138	0.0151989	0.82808	0.164978	0.857153	0.104887	0.927199	0.417648	1.05562	0.947028	0.995715	0.0584983	0.84872	0.510606	1.21222	0.532749	1.08343	0.48497	0.905835
NEGATIVE ION LIPIDS	2538	M681T548	680.622	547.877	7.65526e+06	Cer(d41:1)+HCOO	Cer(d41:1)+HCOO	Cer	C42 H82 O5 N1	680.62	C	680.622	2.54	547.877	680.62	0.1	544.62	NA	NA	NA	NA	0.0863655	2.13864	0.0348163	2.49921	0.529582	1.17875	0.860211	0.960194	0.0638817	1.3452	0.404458	0.846298	0.896188	1.00411	0.0316719	0.892674	0.386879	1.2102	0.227694	1.09839	0.298512	0.882661
NEGATIVE ION LIPIDS	2616	M695T555	694.637	555.414	7.23804e+06	Cer(d42:1)+HCOO	Cer(d42:1)+HCOO	Cer	C43 H84 O5 N1	694.635	C	694.637	2.62	555.414	694.636	0.13	553.14	0.131236	1.98908	0.508712	1.62834	0.0715659	2.029	0.00621733	2.83649	0.339006	1.33515	0.205849	1.21868	0.0227983	1.78889	0.428817	0.778551	0.383921	1.03211	0.0202631	0.904453	0.392094	1.18238	0.185454	1.11673	0.298297	0.898276
NEGATIVE ION LIPIDS	2603	M693T541	692.621	540.943	1.12737e+07	Cer(d42:2)+HCOO	Cer(d42:2)+HCOO	Cer	C43 H82 O5 N1	692.62	C	692.621	2.38	540.943	692.62	-0.01	539.46	0.619422	1.18642	0.773155	0.891715	0.465442	0.927143	0.0101552	1.41248	0.116347	0.897034	0.322917	0.876997	0.00686448	0.968585	0.183134	1.04715	0.870273	0.992548	0.049264	0.889168	0.456212	1.20574	0.352273	1.08279	0.383477	0.902544
NEGATIVE ION LIPIDS	2926	M745T463	744.565	463.402	2.63085e+06	Hex1Cer(d34:1)+HCOO	Hex1Cer(d34:1)+HCOO	Hex1Cer	C41 H78 O10 N1	744.563	C	744.565	2.52	463.402	744.563	0.23	462.15	NA	0.738596	0.407844	0.648401	0.49117	0.930126	0.0112229	1.38332	0.0432198	0.816104	0.192446	0.891708	0.732806	0.984286	0.381123	1.05296	0.782857	1.01074	0.405173	0.949628	0.759157	1.03743	0.687056	0.973646	0.690227	0.954077
NEGATIVE ION LIPIDS	3303	M801T508	800.628	507.964	973030	Hex1Cer(d38:1)+HCOO	Hex1Cer(d38:1)+HCOO	Hex1Cer	C45 H86 O10 N1	800.626	C	800.628	2.61	507.964	800.626	0.1	507.54	NA	NA	NA	NA	NA	NA	NA	NA	0.0213753	0.822185	0.201074	0.821047	0.071945	0.926483	0.163261	1.03603	0.900939	1.00958	0.313169	0.904263	0.428902	1.22862	0.569029	1.07554	0.441155	0.89198
NEGATIVE ION LIPIDS	3472	M829T526	828.659	526.08	6.49508e+06	Hex1Cer(d40:1)+HCOO	Hex1Cer(d40:1)+HCOO	Hex1Cer	C47 H90 O10 N1	828.657	C	828.659	2.3	526.08	828.657	-0.05	525.03	NA	NA	NA	NA	NA	NA	NA	NA	0.929291	0.988111	0.310475	0.788449	0.0589627	0.905571	0.57508	1.03349	0.695457	1.01714	0.0452568	0.877952	0.497779	1.1976	0.239734	1.14813	0.674148	0.937993
NEGATIVE ION LIPIDS	3575	M843T534	842.675	534.329	1.9155e+06	Hex1Cer(d41:1)+HCOO	Hex1Cer(d41:1)+HCOO	Hex1Cer	C48 H92 O10 N1	842.673	C	842.675	2.52	534.329	842.673	-0.01	533.79	NA	NA	NA	NA	NA	NA	NA	NA	0.71519	1.05808	0.615542	0.87278	0.336867	1.05611	0.959595	1.00312	0.643099	1.02087	0.0587528	0.889661	0.571228	1.11519	0.974711	0.998208	0.268202	0.890796
NEGATIVE ION LIPIDS	3685	M857T542	856.691	542.322	4.84014e+06	Hex1Cer(d42:1)+HCOO	Hex1Cer(d42:1)+HCOO	Hex1Cer	C49 H94 O10 N1	856.688	C	856.691	2.76	542.322	856.688	0.11	541.26	NA	NA	NA	NA	NA	NA	NA	NA	0.458839	1.1957	0.894121	0.962914	0.0799788	1.16648	0.442768	0.93315	0.462112	0.985487	0.0286677	0.927091	0.396126	1.16664	0.234252	1.0843	0.373862	0.923398
NEGATIVE ION LIPIDS	4032	M907T455	906.618	454.879	2.07905e+06	Hex2Cer(d34:1)+HCOO	Hex2Cer(d34:1)+HCOO	Hex2Cer	C47 H88 O15 N1	906.616	C	906.618	1.84	454.879	906.616	0.18	453.42	0.226148	0.761919	0.610504	1.08346	0.00744265	1.25395	0.000317769	1.70451	0.00198242	0.740359	0.0645077	0.824003	0.490869	0.970833	0.401901	1.03173	0.561765	1.01284	0.0241531	0.903843	0.59652	1.08798	0.64658	1.01552	0.889951	1.00955
NEGATIVE ION LIPIDS	1865	M540T141	540.332	140.601	1.91826e+08	LPC(16:0)+HCOO	LPC(16:0)+HCOO	LPC	C25 H51 O9 N1 P1	540.331	A	540.332	1.53	140.601	540.331	0.06	140.25	0.221413	1.06427	0.428781	1.033	0.284326	1.01482	0.275764	0.98457	0.160349	1.05956	0.153195	1.0736	0.0754962	0.953593	0.157117	1.05014	0.676144	1.01724	0.111	0.907734	0.543013	1.11674	0.247268	1.11336	0.179807	1.088
NEGATIVE ION LIPIDS	1856	M538T99	538.316	99.1359	3.30202e+06	LPC(16:1)+HCOO	LPC(16:1)+HCOO	LPC	C25 H49 O9 N1 P1	538.315	A	538.316	1.78	99.1359	538.315	0.11	99.3	0.0748971	1.08434	0.323694	1.02889	0.504877	1.01316	0.0846971	0.970801	0.258927	1.04901	0.123416	1.09041	0.481315	0.978228	0.0920905	1.0722	0.372947	1.04114	0.160476	0.924289	0.524002	1.12826	0.203295	1.14685	0.318754	1.10158
NEGATIVE ION LIPIDS	1997	M568T223	568.363	222.918	6.56774e+07	LPC(18:0)+HCOO	LPC(18:0)+HCOO	LPC	C27 H55 O9 N1 P1	568.362	A	568.363	1.79	222.918	568.362	0.17	222.48	0.341611	1.0754	0.48271	1.04402	0.479132	1.0127	0.273883	0.986924	0.495047	1.02756	0.308416	1.05501	0.166716	0.946553	0.250634	1.03712	0.707809	1.01721	0.0842898	0.902251	0.521069	1.13685	0.171653	1.13027	0.142804	1.06633
NEGATIVE ION LIPIDS	1987	M566T157	566.347	156.557	2.84965e+07	LPC(18:1)+HCOO	LPC(18:1)+HCOO	LPC	C27 H53 O9 N1 P1	566.346	A	566.347	1.82	156.557	566.346	0	156.27	0.0441831	1.0946	0.262846	1.02781	0.655982	1.00965	0.336867	0.979355	0.155194	1.06994	0.0958855	1.09093	0.124229	0.954165	0.20394	1.05259	0.646137	1.02276	0.0923085	0.902846	0.513553	1.1392	0.288339	1.10063	0.03276	1.10867
NEGATIVE ION LIPIDS	1975	M564T112	564.332	111.542	4.56458e+07	LPC(18:2)+HCOO	LPC(18:2)+HCOO	LPC	C27 H51 O9 N1 P1	564.331	A	564.332	1.82	111.542	564.331	0.02	110.64	0.043049	1.09212	0.266318	1.02304	0.0909887	1.01708	0.174144	0.973437	0.086297	1.07342	0.0994212	1.08055	0.2132	0.960797	0.095146	1.05358	0.417659	1.0352	0.156413	0.924788	0.533062	1.13127	0.171931	1.12604	0.151873	1.10236
NEGATIVE ION LIPIDS	2116	M590T130	590.348	130.376	3.26384e+06	LPC(20:3)+HCOO	LPC(20:3)+HCOO	LPC	C29 H53 O9 N1 P1	590.346	A	590.348	2.06	130.376	590.346	0.07	129.9	0.146599	1.05462	0.966467	0.998812	0.102742	1.03373	0.497891	0.987217	0.364437	1.04694	0.164215	1.08324	0.229508	0.952569	0.197715	1.05511	0.371429	1.03977	0.108964	0.906302	0.579642	1.11894	0.216423	1.10233	0.0665295	1.09521
NEGATIVE ION LIPIDS	2098	M588T107	588.332	106.851	1.36681e+07	LPC(20:4)+HCOO	LPC(20:4)+HCOO	LPC	C29 H51 O9 N1 P1	588.331	A	588.332	1.96	106.851	588.331	0.06	105.98	0.0944377	1.08213	0.56147	1.01919	0.423549	1.01738	0.2725	0.980417	0.196558	1.05012	0.131422	1.08176	0.183724	0.954839	0.259943	1.05142	0.463316	1.03031	0.155159	0.915045	0.566866	1.11997	0.192273	1.12004	0.209452	1.08079
NEGATIVE ION LIPIDS	1607	M478T158	478.295	157.783	2.75265e+06	LPE(18:1)-H	LPE(18:1)-H	LPE	C23 H45 O7 N1 P1	478.294	A	478.295	1.57	157.783	478.294	0.01	157.53	0.0512416	1.09504	0.325715	1.03022	0.912111	1.00169	0.00357184	0.970381	0.107197	1.0681	0.190004	1.07752	0.168667	0.950495	0.273128	1.04083	0.671875	1.01805	0.0819075	0.905951	0.517246	1.13484	0.126641	1.14019	0.0974914	1.09486
NEGATIVE ION LIPIDS	1599	M476T112	476.279	112.029	4.74431e+06	LPE(18:2)-H	LPE(18:2)-H	LPE	C23 H43 O7 N1 P1	476.278	A	476.279	1.47	112.029	476.278	-0.01	111.78	0.271252	1.09991	0.671895	1.02499	0.700247	0.970409	0.104118	0.884033	0.210026	1.11581	0.621931	1.0328	0.591626	0.954556	0.218815	1.10759	0.340585	1.07126	0.271314	0.909938	0.53241	1.13351	0.174594	1.12293	0.20181	1.09482
NEGATIVE ION LIPIDS	1686	M500T108	500.279	107.524	3.9444e+06	LPE(20:4)-H	LPE(20:4)-H	LPE	C25 H43 O7 N1 P1	500.278	A	500.279	1.88	107.524	500.278	0.02	107.1	0.134875	1.06754	0.395905	1.05836	0.274546	1.05041	0.408336	1.03873	0.475565	1.05524	0.551998	1.04465	0.0567886	0.871033	0.106266	0.929177	0.38099	0.944992	0.128787	0.867682	0.530008	1.11272	0.261272	1.12789	0.189649	1.09119
NEGATIVE ION LIPIDS	1803	M524T100	524.279	100.317	1.75693e+06	LPE(22:6)-H	LPE(22:6)-H	LPE	C27 H43 O7 N1 P1	524.278	A	524.279	1.69	100.317	524.278	-0.01	99.63	0.0780539	1.08799	0.496308	1.01932	0.0386692	1.08778	0.717487	1.01003	0.162221	1.10404	0.00960831	1.1382	0.557584	0.985145	0.68916	1.02301	0.986377	0.998933	0.126348	0.877603	0.475136	1.15159	0.147794	1.12926	0.310219	1.0685
NEGATIVE ION LIPIDS	3125	M775T439	774.531	439.377	2.87846e+06	PC(14:0_18:2)+HCOO	PC(32:2)+HCOO	PC	C41 H77 O10 N1 P1	774.529	A	774.531	2.28	439.377	774.529	0.04	438.84	0.191619	1.2085	0.457174	1.10737	0.937161	1.0018	0.0723525	0.961652	0.0840854	1.06452	0.126809	1.08891	0.366319	0.97223	0.119265	1.06216	0.586337	1.02336	0.144166	0.927493	0.561597	1.1156	0.153778	1.08837	0.86556	0.985734
NEGATIVE ION LIPIDS	3210	M789T453	788.547	453.022	1.75615e+06	PC(15:0_18:2)+HCOO	PC(33:2)+HCOO	PC	C42 H79 O10 N1 P1	788.545	A	788.547	2.91	453.022	788.545	0.04	452.46	0.28547	1.14467	0.631213	1.05912	0.594834	1.00875	0.0164158	0.970809	0.575793	1.02377	0.308345	1.0535	0.335137	0.974435	0.325408	1.03889	0.846499	1.00452	0.0176313	0.904146	0.612055	1.09401	0.323372	1.06049	0.99605	0.999611
NEGATIVE ION LIPIDS	3372	M813T447	812.546	447.325	1.0677e+06	PC(15:0_20:4)+HCOO	PC(35:4)+HCOO	PC	C44 H79 O10 N1 P1	812.545	A	812.546	2.16	447.325	812.545	0.17	447.75	0.143006	1.21397	0.377685	1.09439	0.0872811	1.02924	0.0855217	0.958402	0.126401	1.07382	0.248725	1.06228	0.396046	0.983628	0.227803	1.05527	0.192503	1.0564	0.297323	0.94951	0.613883	1.09051	0.058302	1.08051	0.957933	0.99539
NEGATIVE ION LIPIDS	3156	M779T483	778.562	483.469	7.85349e+06	PC(16:0_16:0)+HCOO	PC(32:0)+HCOO	PC	C41 H81 O10 N1 P1	778.56	A	778.562	2.1	483.469	778.56	0.09	481.26	0.961974	1.00955	0.726183	0.925944	0.00222567	0.806653	0.155137	1.06127	0.69469	0.991757	0.955544	0.999376	0.533515	0.983384	0.0486363	1.06863	0.330854	1.02799	0.0496646	0.922086	0.458818	1.11984	0.251287	1.06905	0.859472	0.987299
NEGATIVE ION LIPIDS	3140	M777T461	776.546	461.084	6.1957e+06	PC(16:0_16:1)+HCOO	PC(32:1)+HCOO	PC	C41 H79 O10 N1 P1	776.545	A	776.546	2.14	461.084	776.545	0.19	458.73	0.280379	1.17005	0.654421	1.06109	0.352781	0.986805	0.874556	0.997587	0.547792	0.990508	0.683401	1.01503	0.917728	0.997783	0.0282343	1.06717	0.510173	1.01886	0.468595	0.959844	0.491855	1.10486	0.324389	1.04926	0.888028	0.989323
NEGATIVE ION LIPIDS	3310	M803T465	802.562	465.095	2.74512e+08	PC(16:0_18:2)+HCOO	PC(34:2)+HCOO	PC	C43 H81 O10 N1 P1	802.56	A	802.562	2.1	465.095	802.56	0.08	464.31	0.215125	1.18091	0.577553	1.07554	0.102735	0.982676	0.55607	0.994772	0.129376	1.04974	0.219146	1.0473	0.323436	0.987084	0.0228278	1.04499	0.456186	1.0186	0.0932613	0.933736	0.626138	1.07306	0.228732	1.05205	0.768379	0.979852
NEGATIVE ION LIPIDS	3300	M801T445	800.546	445.472	1.32903e+07	PC(16:0_18:3)+HCOO	PC(34:3)+HCOO	PC	C43 H79 O10 N1 P1	800.545	A	800.546	2.22	445.472	800.545	0.11	449.82	0.165011	1.18177	0.40067	1.09191	0.78257	0.995174	0.0201266	0.945557	0.276756	1.0508	0.12054	1.06753	0.453388	0.980114	0.338399	1.04419	0.700329	1.01525	0.131478	0.9249	0.584072	1.10459	0.198782	1.07678	0.805063	0.978819
NEGATIVE ION LIPIDS	3469	M829T471	828.578	471.058	9.96051e+07	PC(16:0_20:3)+HCOO	PC(36:3)+HCOO	PC	C45 H83 O10 N1 P1	828.576	A	828.578	1.81	471.058	828.576	0.09	470.7	0.202561	1.18238	0.236921	1.1547	0.63425	0.99207	0.965617	1.00044	0.0776698	1.06528	0.0356263	1.05704	0.915148	1.00298	0.0062778	1.08824	0.568536	1.01995	0.07593	0.926204	0.582766	1.09124	0.299756	1.06533	0.551853	0.914789
NEGATIVE ION LIPIDS	3459	M827T460	826.562	459.766	1.61217e+08	PC(16:0_20:4)+HCOO	PC(36:4)+HCOO	PC	C45 H81 O10 N1 P1	826.56	A	826.562	1.87	459.766	826.56	-0.03	460.74	0.516791	1.11532	0.619216	1.10249	0.53455	0.943227	0.742581	0.970152	0.417289	1.08369	0.451556	1.09133	0.107394	0.885942	0.346073	0.93391	0.904733	1.01087	0.415892	0.929382	0.687992	1.09569	0.938385	0.990941	0.781958	0.979935
NEGATIVE ION LIPIDS	3451	M825T441	824.546	441.143	1.52521e+07	PC(16:0_20:5)+HCOO	PC(36:5)+HCOO	PC	C45 H79 O10 N1 P1	824.545	A	824.546	2.15	441.143	824.545	0.05	440.37	0.122418	1.23859	0.343524	1.11368	0.501458	1.01667	0.0532866	0.961735	0.149961	1.0538	0.0916801	1.08005	0.439445	0.974353	0.138796	1.05087	0.407499	1.03728	0.180382	0.933531	0.531766	1.1219	0.197834	1.09059	0.774831	0.973823
NEGATIVE ION LIPIDS	3211	M789T482	788.582	482.429	4.13287e+06	PC(16:0e_18:2)+HCOO	PC(34:2e)+HCOO	PC	C43 H83 O9 N1 P1	788.581	B	788.582	1.4	482.429	788.581	-0.05	482.64	0.426773	1.13162	0.724028	1.05371	0.0489578	0.949627	0.758238	0.990843	0.188328	1.03729	0.508883	1.02291	0.237382	0.974822	0.049786	1.04372	0.527988	1.0136	0.0421307	0.915474	0.526068	1.12074	0.448345	1.03849	0.572083	0.953317
NEGATIVE ION LIPIDS	3374	M813T477	812.583	477.316	1.2851e+07	PC(16:0e_20:4)+HCOO	PC(36:4e)+HCOO	PC	C45 H83 O9 N1 P1	812.581	A	812.583	1.91	477.316	812.581	0.09	474.84	0.139766	1.20702	0.404024	1.09957	0.153915	0.977064	0.0125143	0.957559	0.11633	1.0558	0.179119	1.06183	0.313401	0.974078	0.0937408	1.04472	0.450795	1.02507	0.0980451	0.916819	0.543598	1.1109	0.296708	1.06353	0.693212	0.971271
NEGATIVE ION LIPIDS	3200	M787T479	786.567	478.839	6.30885e+06	PC(16:1e_18:2)+HCOO	PC(34:3e)+HCOO	PC	C43 H81 O9 N1 P1	786.565	B	786.567	2.29	478.839	786.565	0.02	478.08	0.262199	1.18346	0.562411	1.08425	0.126747	0.968941	0.238294	0.977776	0.0448347	1.06891	0.200156	1.05931	0.424206	0.976535	0.180946	1.04273	0.208941	1.04491	0.0939973	0.923584	0.635519	1.08355	0.444839	1.04519	0.810333	0.978779
NEGATIVE ION LIPIDS	3365	M811T472	810.567	472.458	1.04499e+07	PC(16:1e_20:4)+HCOO	PC(36:5e)+HCOO	PC	C45 H81 O9 N1 P1	810.565	A	810.567	2.15	472.458	810.565	0.02	471.45	0.124407	1.20041	0.418388	1.08647	0.919595	1.00227	0.112391	0.965456	0.259807	1.03555	0.235747	1.04503	0.577164	0.984914	0.0212217	1.07398	0.510918	1.02448	0.168783	0.93414	0.628668	1.08676	0.358344	1.04987	0.840248	0.98233
NEGATIVE ION LIPIDS	3416	M819T496	818.593	496.495	2.49658e+06	PC(17:0_18:1)+HCOO	PC(35:1)+HCOO	PC	C44 H85 O10 N1 P1	818.592	A	818.593	2.14	496.495	818.592	0.28	495.48	0.463071	1.16321	0.904183	1.02448	0.0229103	0.896532	0.773319	0.990068	0.181866	1.04861	0.0918429	1.04803	0.414819	0.980707	0.132293	1.04837	0.840644	1.00771	0.0755234	0.918627	0.549198	1.10749	0.399436	1.04201	0.722246	0.973362
NEGATIVE ION LIPIDS	3399	M817T478	816.578	477.677	6.34258e+06	PC(17:0_18:2)+HCOO	PC(35:2)+HCOO	PC	C44 H83 O10 N1 P1	816.576	A	816.578	1.91	477.677	816.576	0.11	477.3	0.171849	1.22011	0.523434	1.093	0.15427	0.968304	0.392223	0.980739	0.225667	1.04935	0.247528	1.04394	0.124876	0.954694	0.253187	1.03287	0.356167	1.02688	0.0941159	0.917881	0.541935	1.10566	0.375327	1.05882	0.688078	0.96853
NEGATIVE ION LIPIDS	3553	M841T472	840.577	472.141	3.26133e+06	PC(17:0_20:4)+HCOO	PC(37:4)+HCOO	PC	C46 H83 O10 N1 P1	840.576	A	840.577	1.44	472.141	840.576	0.16	468.33	0.156038	1.22101	0.501232	1.08802	0.730206	1.01054	0.194529	0.968377	0.545887	1.01943	0.229262	1.04008	0.669038	0.987051	0.036848	1.07111	0.515409	1.02723	0.412455	0.964588	0.580844	1.08867	0.511562	1.03593	0.828858	0.983779
NEGATIVE ION LIPIDS	3336	M807T506	806.593	506.012	2.38125e+06	PC(18:0_16:0)+HCOO	PC(34:0)+HCOO	PC	C43 H85 O10 N1 P1	806.592	A	806.593	1.74	506.012	806.592	-0.07	503.76	0.845309	1.03669	0.848044	0.963111	0.0286656	0.907884	0.217624	1.03008	0.596575	1.09824	0.513635	1.11345	0.183564	0.966407	0.427302	1.02888	0.556544	1.0149	0.0445656	0.920582	0.443272	1.12811	0.527808	1.03832	0.704684	0.972296
NEGATIVE ION LIPIDS	3495	M833T507	832.609	507.181	2.69554e+07	PC(18:0_18:1)+HCOO	PC(36:1)+HCOO	PC	C45 H87 O10 N1 P1	832.607	A	832.609	2.02	507.181	832.607	0.09	508.2	0.457145	1.1754	0.978378	0.993824	0.00109968	0.861811	0.158067	0.973045	0.10396	1.0465	0.450742	1.02696	0.171205	0.93777	0.772031	0.987095	0.265607	1.02863	0.0506958	0.912956	0.446941	1.13512	0.547985	1.05128	0.4819	0.947793
NEGATIVE ION LIPIDS	3481	M831T489	830.593	488.922	1.6359e+08	PC(18:0_18:2)+HCOO	PC(36:2)+HCOO	PC	C45 H85 O10 N1 P1	830.592	A	830.593	1.89	488.922	830.592	0.1	485.73	0.27943	1.17926	0.758025	1.04688	0.00654038	0.938743	0.16413	0.977593	0.324558	1.03712	0.331297	1.03259	0.566359	0.988116	0.14043	1.04153	0.47717	1.02541	0.131633	0.925922	0.569852	1.10271	0.328486	1.05031	0.684652	0.970202
NEGATIVE ION LIPIDS	3555	M841T500	840.614	500.09	7.70258e+06	PC(18:0e_20:4)+HCOO	PC(38:4e)+HCOO	PC	C47 H87 O9 N1 P1	840.612	B	840.614	1.69	500.09	840.613	0.15	499.68	0.328617	1.26867	0.841749	1.03777	0.963238	0.99772	0.217096	0.931432	0.487937	0.921068	0.706733	0.966971	0.359242	1.03609	0.0208378	1.08732	0.468589	0.9201	0.0919604	0.887789	0.105687	1.34008	0.983169	0.997119	0.420372	0.884342
NEGATIVE ION LIPIDS	3653	M853T461	852.577	461.068	2.83332e+07	PC(18:1_20:4)+HCOO	PC(38:5)+HCOO	PC	C47 H83 O10 N1 P1	852.576	A	852.577	1.47	461.068	852.576	0.05	461.55	0.0584942	1.23756	0.211257	1.12599	0.891213	1.00248	0.214483	0.985866	0.105853	1.05454	0.286597	1.06412	0.531751	1.02582	0.109439	1.05347	0.718728	0.983989	0.190396	0.912949	0.487781	1.10405	0.709284	0.943949	0.617392	0.964464
NEGATIVE ION LIPIDS	3385	M815T502	814.599	501.959	1.89734e+06	PC(18:1e_18:2)+HCOO	PC(36:3e)+HCOO	PC	C45 H85 O9 N1 P1	814.597	B	814.599	2.28	501.959	814.597	0.05	501.21	0.661292	1.08857	0.801046	0.949238	0.0535969	0.933075	0.867951	1.0061	NA	1.0917	0.988334	0.999473	0.183491	0.980027	NA	NA	0.7119	1.01832	0.307335	0.932144	0.294404	1.29987	0.403761	1.04886	NA	0.966987
NEGATIVE ION LIPIDS	3545	M839T479	838.598	478.572	9.04367e+06	PC(18:1e_20:4)+HCOO	PC(38:5e)+HCOO	PC	C47 H85 O9 N1 P1	838.597	B	838.598	1.93	478.572	838.597	-0.05	474.54	0.110135	1.21901	0.227904	1.13938	0.978123	1.00049	0.141023	0.969977	0.143194	1.0578	0.155662	1.05992	0.373299	0.972581	0.0984293	1.04534	0.289546	1.02971	0.0729803	0.920227	0.594898	1.09773	0.390377	1.05385	0.48289	0.945542
NEGATIVE ION LIPIDS	3460	M827T447	826.562	446.795	2.03733e+07	PC(18:2_18:2)+HCOO	PC(36:4)+HCOO	PC	C45 H81 O10 N1 P1	826.56	A	826.562	2.02	446.795	826.56	-0.06	446.25	0.0414627	1.28117	0.174354	1.14966	NA	0.998479	NA	0.945675	NA	0.986567	NA	0.974083	NA	0.974708	NA	1.02952	NA	1.0629	NA	0.983952	0.379365	1.15895	NA	1.08181	0.771952	0.974841
NEGATIVE ION LIPIDS	2744	M717T487	716.525	486.746	2.48174e+06	PE(16:0_18:1)-H	PE(34:1)-H	PE	C39 H75 O8 N1 P1	716.524	A	716.525	2.08	486.746	716.523	-0.14	486.36	0.963984	1.01464	0.811756	0.916551	0.00870173	0.808424	0.980539	1.00109	0.888456	0.991981	0.761702	0.988653	0.871588	0.992399	0.418109	1.05066	0.850316	1.01038	0.12739	0.878617	0.565977	1.14649	0.248498	1.09954	0.679121	0.963058
NEGATIVE ION LIPIDS	2731	M715T468	714.509	467.691	5.13664e+06	PE(16:0_18:2)-H	PE(34:2)-H	PE	C39 H73 O8 N1 P1	714.508	B	714.509	1.94	467.691	714.508	0.07	464.79	0.391387	1.20812	0.933018	1.02073	0.00923192	0.884832	0.555191	1.01438	0.25309	1.04462	0.426106	1.02809	0.076113	0.951475	0.011631	1.0556	0.845148	1.01065	0.097102	0.894926	0.662463	1.12174	0.44988	1.06858	0.904777	0.985754
NEGATIVE ION LIPIDS	2889	M739T463	738.509	463.039	8.44789e+06	PE(16:0_20:4)-H	PE(36:4)-H	PE	C41 H73 O8 N1 P1	738.508	A	738.509	1.95	463.039	738.508	0.27	461.43	0.33194	1.28391	0.739926	1.087	0.0728223	0.907736	0.525042	0.979533	0.105995	1.07236	0.126609	1.09212	0.2649	0.947259	0.334469	1.05513	0.481248	1.02239	0.185398	0.911025	0.6354	1.12238	0.47295	1.07131	0.635521	0.933422
NEGATIVE ION LIPIDS	3051	M765T465	764.525	464.814	6.69052e+06	PE(16:0_22:5)-H	PE(38:5)-H	PE	C43 H75 O8 N1 P1	764.524	A	764.525	1.86	464.814	764.524	0.11	464.7	0.304653	1.2597	0.83793	1.04758	0.112814	0.931225	0.108967	0.944617	0.437863	1.06651	0.433572	1.08561	0.948898	1.00439	0.331872	1.0665	0.537684	1.04173	0.849613	0.980542	0.575724	1.15171	0.0531095	1.11606	0.357427	0.889583
NEGATIVE ION LIPIDS	3029	M763T455	762.509	454.526	4.67821e+06	PE(16:0_22:6)-H	PE(38:6)-H	PE	C43 H73 O8 N1 P1	762.508	A	762.509	2.04	454.526	762.508	-0.04	453	0.214564	1.21361	0.561245	1.08722	0.218179	0.968707	0.263539	0.985602	0.467652	1.03128	0.365701	1.03992	0.212322	0.956453	0.208295	1.05241	0.966581	1.00212	0.0713683	0.871308	0.589225	1.12322	0.270254	1.07436	0.47222	0.933896
NEGATIVE ION LIPIDS	2641	M699T480	698.515	480.497	3.74528e+06	PE(16:1e_18:2)-H	PE(34:3e)-H	PE	C39 H73 O7 N1 P1	698.513	B	698.515	2.13	480.497	698.513	0.06	479.76	0.517223	1.12563	0.841544	1.03783	0.00229643	0.855978	0.266869	0.982804	0.259361	1.03554	0.365025	1.04162	0.160209	0.952357	0.143557	1.07114	0.542546	1.03234	0.0784607	0.882836	0.593159	1.13282	0.427035	1.06436	0.44823	0.923148
NEGATIVE ION LIPIDS	2937	M747T466	746.515	466.238	1.05919e+07	PE(16:1e_22:6)-H	PE(38:7e)-H	PE	C43 H73 O7 N1 P1	746.513	A	746.515	2.02	466.238	746.513	0.11	465.15	0.189299	1.34721	0.67919	1.09731	0.298394	0.94198	0.121397	0.96581	0.139169	1.06244	0.285062	1.05615	0.142335	0.923972	0.379916	1.0397	0.550579	1.06335	0.112715	0.892662	0.714618	1.10352	0.544435	1.04987	0.917074	0.990384
NEGATIVE ION LIPIDS	2925	M745T507	744.556	506.937	2.08437e+06	PE(18:0_18:1)-H	PE(36:1)-H	PE	C41 H79 O8 N1 P1	744.555	A	744.556	2.12	506.937	744.555	-0.18	506.49	0.255628	1.31222	0.669323	1.1041	0.00267186	0.800675	0.655311	1.015	0.240338	0.956945	0.155763	0.956685	0.136187	0.92395	0.49579	1.03637	0.710922	1.0198	0.0915271	0.859075	0.492354	1.20064	0.395797	1.09807	0.610286	0.935171
NEGATIVE ION LIPIDS	3087	M769T496	768.556	495.569	1.23908e+06	PE(18:0_20:3)-H	PE(38:3)-H	PE	C43 H79 O8 N1 P1	768.555	A	768.556	2.01	495.569	768.555	-0.04	493.98	0.692535	1.09341	0.579276	0.849873	NA	NA	NA	NA	0.337755	1.02488	0.840482	1.00468	NA	0.914874	NA	0.993584	0.870738	1.01119	0.265031	0.928891	NA	0.927282	0.0430502	1.16367	0.683936	0.959102
NEGATIVE ION LIPIDS	3072	M767T486	766.541	486.023	2.14502e+07	PE(18:0_20:4)-H	PE(38:4)-H	PE	C43 H77 O8 N1 P1	766.539	A	766.541	2.08	486.023	766.539	-0.05	482.13	0.473752	1.19634	0.861283	0.955504	0.00939162	0.842517	0.701865	0.985486	0.649907	1.02237	0.577287	0.977842	0.245722	0.967677	0.206717	1.05602	0.860802	1.01006	0.157386	0.900137	0.549107	1.14597	0.209221	1.12564	0.633683	0.949265
NEGATIVE ION LIPIDS	3245	M793T485	792.555	485.274	1.66369e+06	PE(18:0_22:5)-H	PE(40:5)-H	PE	C45 H79 O8 N1 P1	792.555	B	792.555	0.75	485.274	792.555	-0.16	485.19	0.641706	1.11386	0.823771	1.06286	0.0223387	0.833577	0.261983	0.945042	0.457598	0.848922	0.778105	0.946107	0.599951	1.12995	0.0695832	1.43627	0.359909	0.838436	0.590471	0.89015	0.475749	1.3608	0.677189	1.12278	0.480621	0.831957
NEGATIVE ION LIPIDS	2913	M743T490	742.541	490.085	1.05808e+07	PE(18:1_18:1)-H	PE(36:2)-H	PE	C41 H77 O8 N1 P1	742.539	A	742.541	2.01	490.085	742.539	-0.07	488.34	0.513364	1.15409	0.798352	0.941406	0.00527701	0.806074	0.629696	0.976641	0.333756	1.04677	0.189163	1.03993	0.38931	0.969559	0.172906	1.06828	0.606272	1.03546	0.204397	0.898693	0.642678	1.12164	0.296751	1.08576	0.606619	0.948193
NEGATIVE ION LIPIDS	2903	M741T470	740.525	470.333	4.39909e+06	PE(18:1_18:2)-H	PE(36:3)-H	PE	C41 H75 O8 N1 P1	740.524	B	740.525	1.53	470.333	740.524	-0.08	469.8	0.248644	1.24414	0.796257	1.04627	0.887836	1.02051	0.307665	0.893182	0.625291	1.02418	0.763784	0.97283	0.417514	0.968038	0.995776	0.999633	0.762056	0.969851	0.0939347	0.886865	0.502157	1.22234	0.940591	0.994062	0.863948	0.967421
NEGATIVE ION LIPIDS	2821	M729T518	728.562	517.738	1.30341e+06	PE(18:1e_18:1)-H	PE(36:2e)-H	PE	C41 H79 O7 N1 P1	728.56	B	728.562	2.37	517.738	728.56	0.16	516.36	0.17888	1.48503	0.52017	1.26765	0.0199892	0.816191	0.577688	1.03264	0.0478773	0.939335	0.135169	0.959611	0.157209	0.964344	0.178979	1.04018	0.81091	1.00954	0.124846	0.909105	0.60353	1.10781	0.279646	1.05889	0.948526	1.0072
NEGATIVE ION LIPIDS	2969	M751T497	750.546	496.964	2.0833e+07	PE(18:1e_20:4)-H	PE(38:5e)-H	PE	C43 H77 O7 N1 P1	750.544	A	750.546	2.25	496.964	750.544	0.02	496.47	0.493083	1.14619	0.950301	0.98632	0.00125525	0.843287	0.71487	1.0119	0.437684	1.02318	0.18246	1.06404	0.189541	0.927665	0.698672	1.02483	0.8213	0.98848	0.0789175	0.883756	0.560279	1.1461	0.108316	1.10293	0.544405	0.937161
NEGATIVE ION LIPIDS	3127	M775T489	774.546	489.03	6.96875e+06	PE(18:1e_22:6)-H	PE(40:7e)-H	PE	C45 H77 O7 N1 P1	774.544	A	774.546	1.85	489.03	774.544	0.12	488.67	0.392056	1.25711	0.899978	1.03444	0.0230242	0.834339	0.521856	0.965807	0.102137	1.09837	0.393066	1.03176	0.0382932	0.956771	0.235045	1.04898	0.67633	1.02946	0.269976	0.902454	0.651456	1.12493	0.208161	1.10197	0.557882	0.939025
NEGATIVE ION LIPIDS	2810	M727T502	726.546	501.599	5.86549e+06	PE(18:2e_18:1)-H	PE(36:3e)-H	PE	C41 H77 O7 N1 P1	726.544	B	726.546	2.27	501.599	726.544	0.04	498.15	0.643914	1.11628	0.937181	0.979579	0.00162494	0.839205	0.701426	1.01092	0.420995	1.01277	0.900112	1.00071	0.283998	0.976613	0.0363287	1.06268	0.709141	1.02148	0.206491	0.92066	0.562319	1.11463	0.230163	1.06299	0.529485	0.946451
NEGATIVE ION LIPIDS	2795	M725T483	724.53	483.148	7.85098e+06	PE(18:2e_18:2)-H	PE(36:4e)-H	PE	C41 H75 O7 N1 P1	724.529	A	724.53	1.9	483.148	724.529	0.15	477.84	0.0343643	1.66511	0.365963	1.20989	0.89138	0.979342	0.897061	0.980631	0.230492	1.06109	0.228672	1.0559	0.543439	0.980789	0.844719	1.02323	0.900322	1.0187	0.839896	0.972897	0.217426	1.32519	0.223733	1.10669	0.58295	0.9343
NEGATIVE ION LIPIDS	3113	M773T469	772.53	468.759	3.94775e+06	PE(18:2e_22:6)-H	PE(40:8e)-H	PE	C45 H75 O7 N1 P1	772.529	A	772.53	1.97	468.759	772.529	0.06	468.36	0.131086	1.40858	0.470634	1.15211	0.527537	0.98069	0.937309	0.998433	0.349344	1.04337	0.335567	1.0354	0.218437	0.971486	0.0348443	1.07109	0.436474	1.042	0.147524	0.901692	0.628345	1.13111	0.556501	1.05867	0.875509	0.980522
NEGATIVE ION LIPIDS	3158	M779T516	778.578	516.178	1.1825e+06	PE(20:1e_20:4)-H	PE(40:5e)-H	PE	C45 H81 O7 N1 P1	778.576	B	778.578	2.72	516.178	778.576	0.01	515.58	NA	NA	NA	NA	0.111526	0.679628	0.21801	0.803399	0.400499	0.835905	0.866105	1.04242	0.17026	0.941017	0.189396	1.03141	0.391164	0.87455	0.155522	0.770763	0.0799255	1.26891	0.646808	0.944159	0.648734	0.935568
NEGATIVE ION LIPIDS	3518	M836T461	835.535	460.765	2.80878e+06	PI(16:0_18:1)-H	PI(34:1)-H	PI	C43 H80 O13 N0 P1	835.534	A	835.535	1.17	460.765	835.534	0.01	460.41	0.800948	1.05874	0.900509	1.03163	0.00198153	0.802136	0.386207	1.02268	0.00819242	0.915361	0.123787	0.959948	0.536318	0.973334	0.467965	1.04336	0.996606	1.00014	0.226634	0.9084	0.422174	1.19123	0.591678	0.926423	0.787778	1.02462
NEGATIVE ION LIPIDS	3497	M834T441	833.52	440.519	2.76485e+06	PI(16:0_18:2)-H	PI(34:2)-H	PI	C43 H78 O13 N0 P1	833.519	A	833.52	1.91	440.519	833.519	-0.04	438.15	0.669455	1.07787	0.978582	1.00521	0.00272796	0.834197	0.539923	0.9869	0.990744	1.00018	0.19797	1.03286	0.619899	0.985255	0.172178	1.06066	0.5294	1.02795	0.0903295	0.911678	0.512821	1.11228	0.620203	0.943976	0.717142	1.01976
NEGATIVE ION LIPIDS	3686	M858T436	857.52	436.165	2.57748e+06	PI(16:0_20:4)-H	PI(36:4)-H	PI	C45 H78 O13 N0 P1	857.519	A	857.52	2.11	436.165	857.519	0.02	434.73	0.249581	1.18911	0.531101	1.11305	0.0539657	0.886309	0.675873	0.990881	0.527438	1.02455	0.352418	1.04625	0.0604253	0.940539	0.434163	1.02369	0.748933	1.01338	0.293172	0.92727	0.66461	1.07771	0.260414	0.894712	0.608902	1.03551
NEGATIVE ION LIPIDS	3749	M864T483	863.567	482.701	1.96779e+06	PI(18:0_18:1)-H	PI(36:1)-H	PI	C45 H84 O13 N0 P1	863.566	A	863.567	1.54	482.701	863.565	-0.04	482.4	0.679323	0.925076	0.953811	1.01333	0.0223558	0.886386	0.0129757	1.19411	0.110277	0.909628	0.0829636	0.952264	0.340739	0.979267	0.0701616	1.08608	0.699258	1.02657	0.0767545	0.907116	0.430049	1.16959	0.481452	0.91433	0.772535	1.02693
NEGATIVE ION LIPIDS	3924	M888T471	887.568	470.886	3.04911e+06	PI(18:0_20:3)-H	PI(38:3)-H	PI	C47 H84 O13 N0 P1	887.566	A	887.568	2.28	470.886	887.565	-0.01	470.34	0.7833	1.05815	0.840051	0.950597	0.000148859	0.808786	0.81566	1.01201	0.299589	0.970672	0.731613	1.00659	0.384784	0.965467	0.0879525	1.0743	0.254725	1.04485	0.232533	0.940398	0.274016	1.26761	0.461462	0.919229	0.591855	1.0514
NEGATIVE ION LIPIDS	3730	M862T465	861.551	465.032	1.00166e+07	PI(18:1_18:1)-H	PI(36:2)-H	PI	C45 H82 O13 N0 P1	861.55	A	861.551	1.55	465.032	861.55	-0.13	461.73	0.789226	1.0638	0.947584	1.01774	0.00453643	0.803216	0.230802	1.05095	0.844099	0.989063	0.635869	1.01504	0.57837	0.978191	0.0248545	1.08984	0.652816	1.02152	0.227685	0.915816	0.547459	1.12454	0.241621	0.876344	0.929377	0.992019
NEGATIVE ION LIPIDS	3709	M860T444	859.535	444.303	2.16497e+06	PI(18:1_18:2)-H	PI(36:3)-H	PI	C45 H80 O13 N0 P1	859.534	A	859.535	0.83	444.303	859.534	-0.04	443.01	0.583256	1.10036	0.781014	1.05167	0.000215759	0.828785	0.13555	0.866957	0.487891	1.02235	0.3906	1.03273	0.306496	0.898446	0.302032	1.03751	0.642784	1.01891	0.118394	0.91511	0.551947	1.0962	0.22464	0.816503	0.217323	1.11415
NEGATIVE ION LIPIDS	3893	M884T440	883.536	440.276	1.79166e+06	PI(18:1_20:4)-H	PI(38:5)-H	PI	C47 H80 O13 N0 P1	883.534	A	883.536	2.13	440.276	883.534	0.08	435.57	0.265067	1.18649	0.626265	1.07327	0.144744	0.913508	0.013969	0.968845	0.118048	1.03733	0.075825	1.05448	0.238452	0.969867	0.487253	1.02413	0.510984	1.0285	0.181052	0.933451	0.511856	1.12041	0.420747	0.935718	0.897743	1.00886
NEGATIVE ION LIPIDS	2759	M720T427	719.536	427.287	6.08601e+06	SM(d32:1)+HCOO	SM(d32:1)+HCOO	SM	C38 H76 O8 N2 P1	719.534	C	719.536	2.4	427.287	719.535	0.07	426.69	0.774533	0.937171	0.709686	0.917269	0.0410854	0.866785	0.0234195	1.05964	0.439146	1.02338	0.150977	1.05146	0.248242	0.962104	0.144349	1.05758	0.881746	1.00573	0.14776	0.919563	0.579388	1.11243	0.203351	1.10273	0.72154	1.03056
NEGATIVE ION LIPIDS	2853	M734T444	733.552	444.29	4.47982e+06	SM(d33:1)+HCOO	SM(d33:1)+HCOO	SM	C39 H78 O8 N2 P1	733.55	C	733.552	2.25	444.29	733.55	0.12	446.64	0.572511	0.857149	0.671566	0.891446	0.00257459	0.833946	0.0106473	1.08728	0.535518	0.990464	0.690949	1.00511	0.417112	0.975229	0.142255	1.05405	0.362434	1.03893	0.219641	0.940405	0.488505	1.12949	0.123176	1.08958	0.678393	1.03942
NEGATIVE ION LIPIDS	2947	M748T458	747.567	458.095	8.24711e+07	SM(d34:1)+HCOO	SM(d34:1)+HCOO	SM	C40 H80 O8 N2 P1	747.566	C	747.567	1.99	458.095	747.566	0.16	457.38	0.407403	0.825255	0.638635	0.900588	0.0456695	0.914604	0.00497518	1.22414	0.0495298	0.920203	0.0904909	0.946583	0.956614	0.998793	0.0649745	1.06366	0.749325	1.00982	0.167919	0.928814	0.476994	1.10019	0.419045	1.03807	0.707677	1.02418
NEGATIVE ION LIPIDS	2933	M746T431	745.552	431.06	8.89412e+06	SM(d34:2)+HCOO	SM(d34:2)+HCOO	SM	C40 H78 O8 N2 P1	745.55	C	745.552	2.39	431.06	745.55	0.15	428.91	0.857746	1.02943	0.886655	0.976368	0.0705553	0.930391	0.82106	0.997476	0.557151	1.02268	0.470144	1.0258	0.997734	1.00006	0.0642445	1.09085	0.88549	1.00767	0.0959699	0.900317	0.569936	1.12017	0.203154	1.09468	0.84512	1.01655
NEGATIVE ION LIPIDS	3025	M762T472	761.583	471.594	1.88294e+06	SM(d35:1)+HCOO	SM(d35:1)+HCOO	SM	C41 H82 O8 N2 P1	761.581	C	761.583	2.25	471.594	761.581	0.08	471.12	0.599033	0.862219	0.39155	0.712681	0.957695	1.00411	0.0110165	1.32236	0.0194533	0.891922	0.244204	0.938977	0.768415	0.991297	0.0995841	1.05999	0.520034	1.02337	0.180648	0.939103	0.638653	1.07594	0.299815	1.04602	0.834749	1.01749
NEGATIVE ION LIPIDS	3135	M776T484	775.599	483.976	1.38191e+07	SM(d36:1)+HCOO	SM(d36:1)+HCOO	SM	C42 H84 O8 N2 P1	775.597	C	775.599	2.11	483.976	775.597	0.01	482.31	0.156965	0.791166	0.790787	0.965201	0.0331084	1.20354	0.00051729	1.48852	0.0268287	0.834934	0.120818	0.864876	0.36587	0.984305	0.028707	1.05669	0.2751	1.02798	0.182755	0.944916	0.448819	1.11245	0.282761	1.04884	0.975862	1.00199
NEGATIVE ION LIPIDS	3122	M774T461	773.583	460.536	7.72261e+06	SM(d36:2)+HCOO	SM(d36:2)+HCOO	SM	C42 H82 O8 N2 P1	773.581	C	773.583	1.99	460.536	773.582	0.19	458.88	0.927997	1.01629	0.842545	0.962458	0.000287301	0.853549	0.0168549	1.03471	0.559236	0.994882	0.868084	1.00204	0.810126	1.0033	0.062796	1.06012	0.887953	0.996453	0.152793	0.916871	0.558709	1.08561	0.236436	1.05832	0.871167	1.0112
NEGATIVE ION LIPIDS	3319	M804T507	803.63	506.779	1.22554e+07	SM(d38:1)+HCOO	SM(d38:1)+HCOO	SM	C44 H88 O8 N2 P1	803.628	C	803.63	2.31	506.779	803.629	0.25	505.32	0.428641	0.89448	0.953799	1.00758	0.0138364	1.3972	0.00141387	1.57151	0.0201065	0.809291	0.0784365	0.834991	0.0317738	0.94819	0.747671	1.00968	0.430973	1.01771	0.019559	0.899853	0.460994	1.1223	0.498687	1.03987	0.818387	0.982559
NEGATIVE ION LIPIDS	3307	M802T485	801.615	485.488	4.30361e+06	SM(d38:2)+HCOO	SM(d38:2)+HCOO	SM	C44 H86 O8 N2 P1	801.613	C	801.615	2.53	485.488	801.613	0.16	484.83	0.908996	0.982296	0.794552	0.955796	0.0120511	0.859669	0.0100897	1.12072	0.740047	1.00701	0.697813	0.995366	0.973083	0.998973	0.0183795	1.0503	0.615319	1.01445	0.182097	0.928258	0.441894	1.13038	0.320619	1.05124	0.848477	1.01193
NEGATIVE ION LIPIDS	3410	M818T518	817.646	517.682	4.07453e+06	SM(d39:1)+HCOO	SM(d39:1)+HCOO	SM	C45 H90 O8 N2 P1	817.644	C	817.646	2.91	517.682	817.644	0.09	516.15	0.865304	1.02021	0.639384	1.08147	0.0238947	1.57576	0.00296189	1.91029	0.0158064	0.78409	0.139623	0.817744	0.101306	0.950363	0.400624	1.01663	0.968147	0.998518	0.0899547	0.907448	0.477214	1.12146	0.334397	1.05692	0.776203	0.978259
NEGATIVE ION LIPIDS	3489	M832T526	831.662	526.132	2.6529e+07	SM(d40:1)+HCOO	SM(d40:1)+HCOO	SM	C46 H92 O8 N2 P1	831.66	C	831.662	2.23	526.132	831.66	0.13	524.07	0.378226	1.09199	0.129654	1.29415	0.0174778	2.05176	0.00275817	2.20238	0.0389392	0.800964	0.254901	0.859004	0.00024363	0.943128	0.246044	1.02962	0.840317	1.00742	0.0604935	0.91301	0.484936	1.11423	0.328049	1.06147	0.892732	0.988658
NEGATIVE ION LIPIDS	3476	M830T508	829.646	507.769	2.08297e+07	SM(d40:2)+HCOO	SM(d40:2)+HCOO	SM	C46 H90 O8 N2 P1	829.644	C	829.646	2.26	507.769	829.644	0.22	506.73	0.956183	0.989953	0.802151	0.949394	0.0477813	0.889954	0.0239697	1.16471	0.0339253	0.963026	0.00133383	0.950327	0.355881	0.972599	0.40239	1.02271	0.35235	1.02473	0.0676424	0.91031	0.478427	1.12668	0.424475	1.04531	0.744063	0.975735
NEGATIVE ION LIPIDS	3601	M846T536	845.677	535.781	1.23231e+07	SM(d41:1)+HCOO	SM(d41:1)+HCOO	SM	C47 H94 O8 N2 P1	845.675	C	845.677	2.39	535.781	845.675	0.03	535.71	0.1056	1.24717	0.118237	1.48346	0.0130297	2.90178	0.00204012	3.18839	0.0755307	0.798974	0.207053	0.747757	0.00436254	0.973527	0.442311	1.00633	0.837408	1.00662	0.0920803	0.912929	0.426695	1.13205	0.515659	1.03292	0.619547	0.962962
NEGATIVE ION LIPIDS	3583	M844T518	843.662	518.397	9.34237e+06	SM(d41:2)+HCOO	SM(d41:2)+HCOO	SM	C47 H92 O8 N2 P1	843.66	C	843.662	2.49	518.397	843.66	0	516.33	0.964167	0.992424	0.879738	0.96933	0.255987	0.92789	0.0171463	1.24735	0.04492	0.93894	0.123168	0.943393	0.324777	0.978894	0.322136	1.02719	0.694413	1.01363	0.10805	0.918708	0.500303	1.12377	0.335978	1.05586	0.693525	0.970481
NEGATIVE ION LIPIDS	3691	M858T526	857.677	526.343	5.31813e+07	SM(d42:2)+HCOO	SM(d42:2)+HCOO	SM	C48 H94 O8 N2 P1	857.675	C	857.677	2.07	526.343	857.675	0.16	524.28	0.97554	1.0046	0.941814	1.01371	0.167135	1.14808	0.00591171	1.48985	0.00848615	0.872572	0.0809568	0.885908	0.0375397	0.968827	0.257504	1.03781	0.882158	1.00483	0.0549909	0.91538	0.536056	1.10742	0.245764	1.07212	0.826033	0.98247
NEGATIVE ION LIPIDS	3676	M856T508	855.661	508.184	2.46929e+07	SM(d42:3)+HCOO	SM(d42:3)+HCOO	SM	C48 H92 O8 N2 P1	855.66	C	855.661	1.92	508.184	855.66	0.08	505.95	0.814096	1.04505	0.900352	0.973935	0.00257623	0.847684	0.150214	1.05738	0.15919	0.987315	0.0291498	0.970913	0.34332	0.970994	0.239471	1.02879	0.38116	1.02841	0.113708	0.924513	0.48001	1.12404	0.427898	1.04432	0.663617	0.96682
NEGATIVE ION LIPIDS	3809	M872T533	871.693	533.373	1.8994e+06	SM(d43:2)+HCOO	SM(d43:2)+HCOO	SM	C49 H96 O8 N2 P1	871.691	C	871.693	2.64	533.373	871.691	0.08	531.66	NA	NA	NA	NA	NA	1.59468	NA	2.12745	0.0123932	0.855681	0.0805403	0.86404	0.213569	0.977284	0.10326	1.04602	0.95375	1.00186	0.0871653	0.920326	0.518427	1.11321	0.366556	1.04809	0.719336	0.974204
